# Supplementary material for: The Evolution of the Secreted Regulatory Protein Progranulin
Source: PubMed Central journal article supplement (PMC4527844; doi:10.1371/journal.pone.0133749), 2015-08-06

LONG FORM PROGRAMULIN\_A of Danio rerio

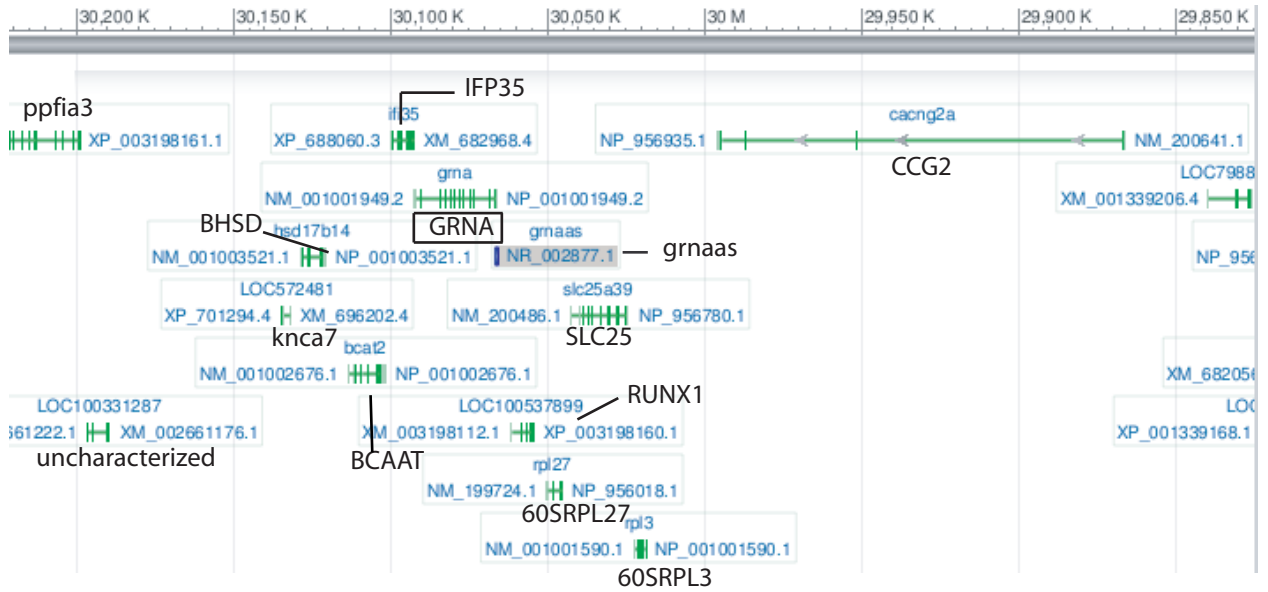

LONG FORM PROGRAMULIN\_A OF Oreochromis niloticus

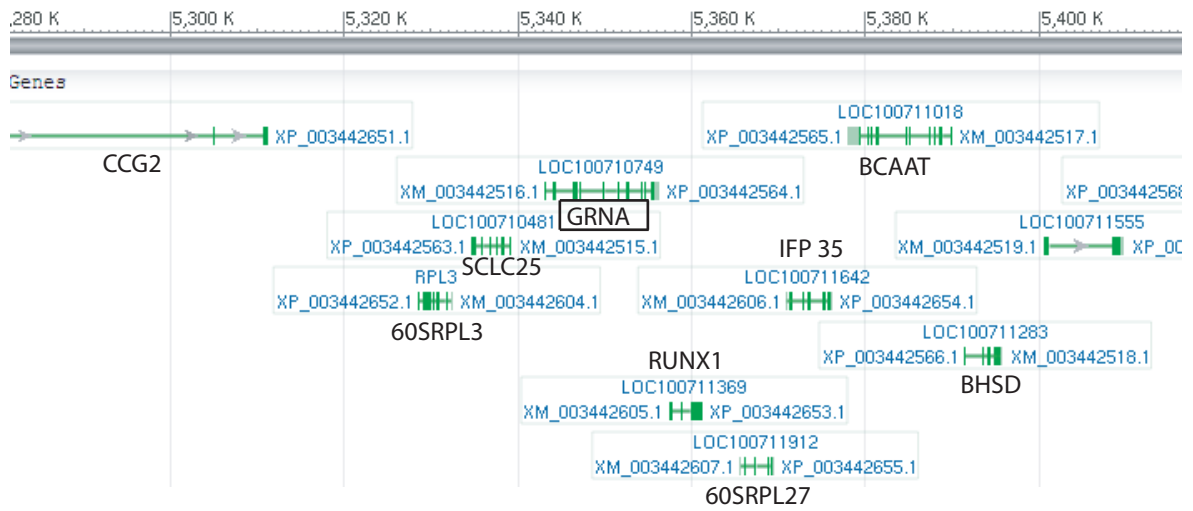

SHORT PROGRAMULIN\_A RELATED PROTEIN OF Takifugu rubripes

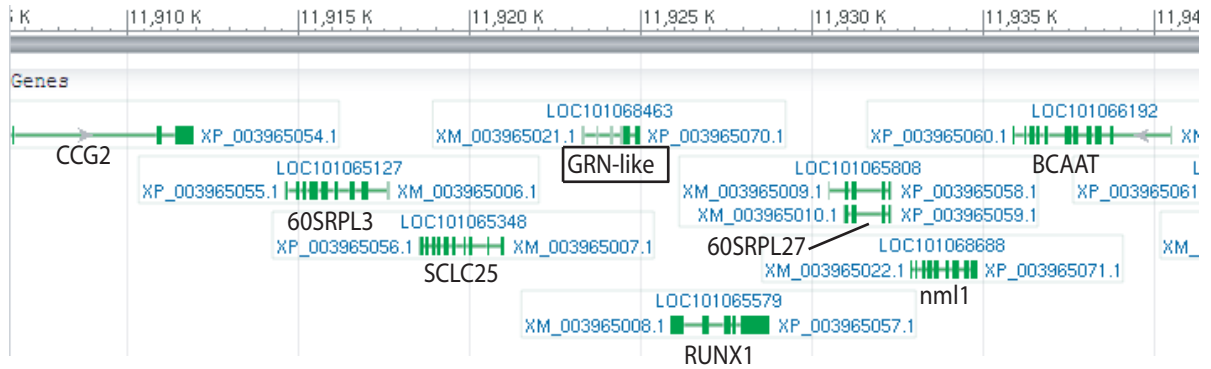

Supplement: pone.0133749.s001.pdf [file pone.0133749.s001.pdf]
