# Supplementary material for: The Evolution of the Secreted Regulatory Protein Progranulin
Source: PubMed Central journal article supplement (PMC4527844; doi:10.1371/journal.pone.0133749), 2015-08-06

LONG FORM PROGRANULIN\_B of Danio rerio

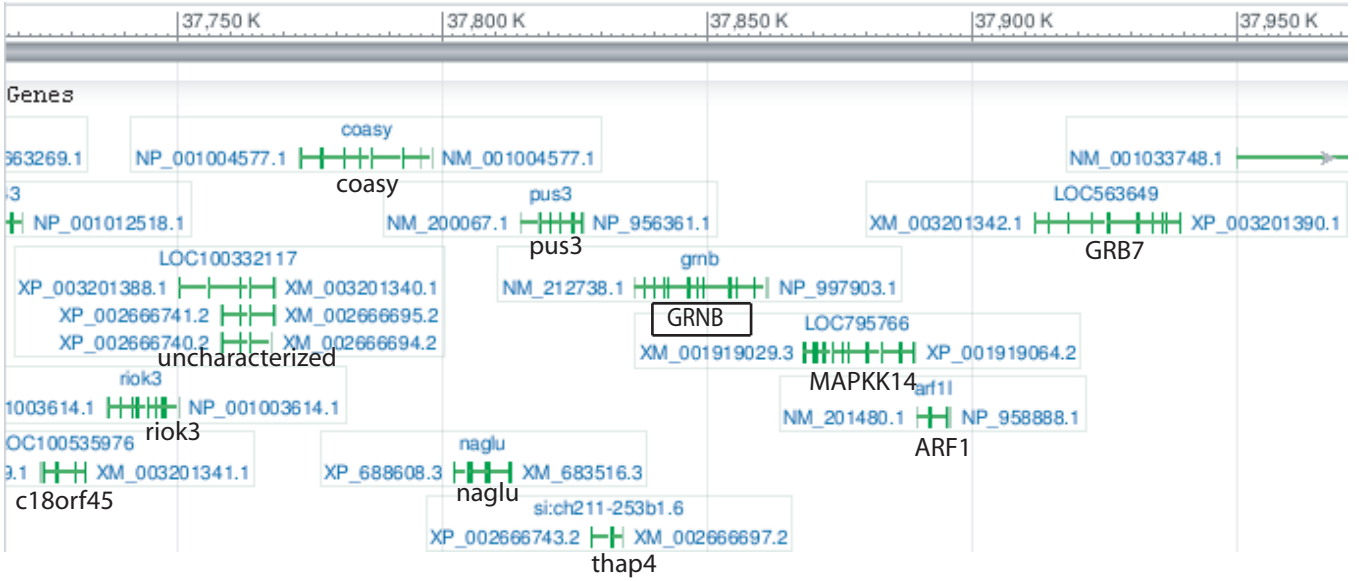

LONG FORM PROGRANULIN\_B OF Oreochromis niloticus

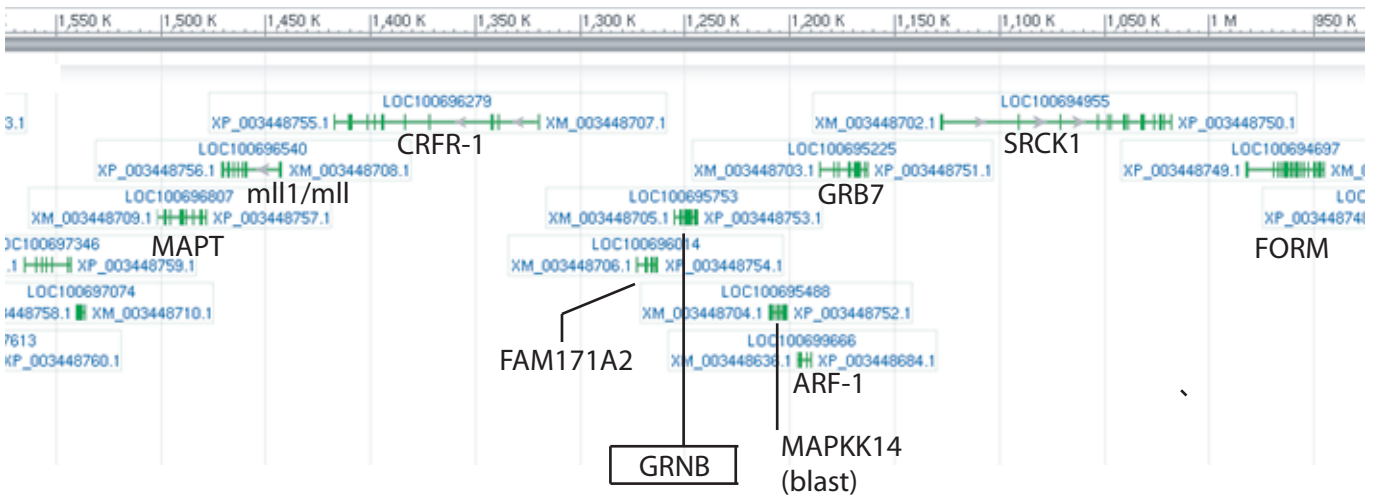

LONG FORM PROGRANULIN OF Takifugu rubripes -

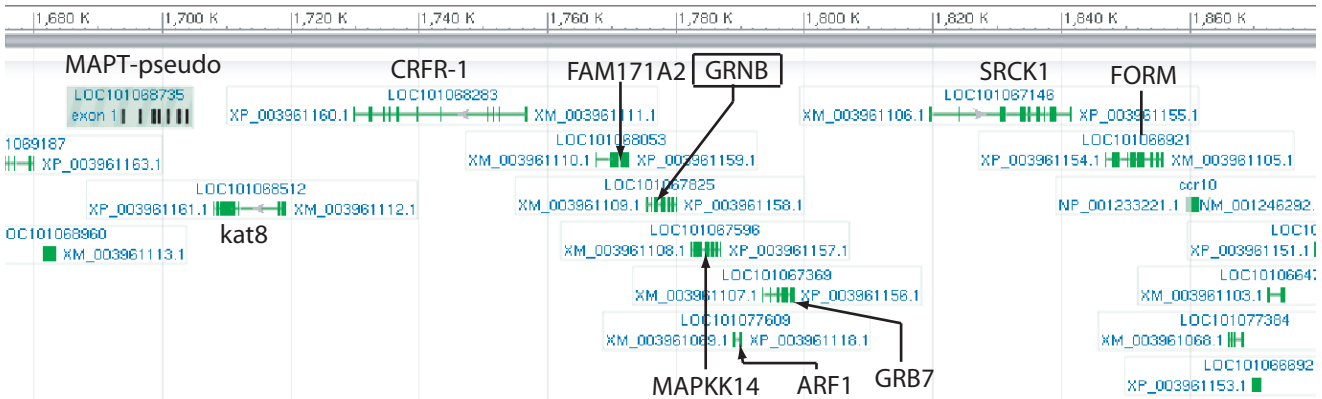

Supplement: pone.0133749.s002.pdf [file pone.0133749.s002.pdf]
