# Supplementary material for: The Evolution of the Secreted Regulatory Protein Progranulin
Source: PubMed Central journal article supplement (PMC4527844; doi:10.1371/journal.pone.0133749), 2015-08-06

SHORT FORM GRANULINS OF *Danio rerio*

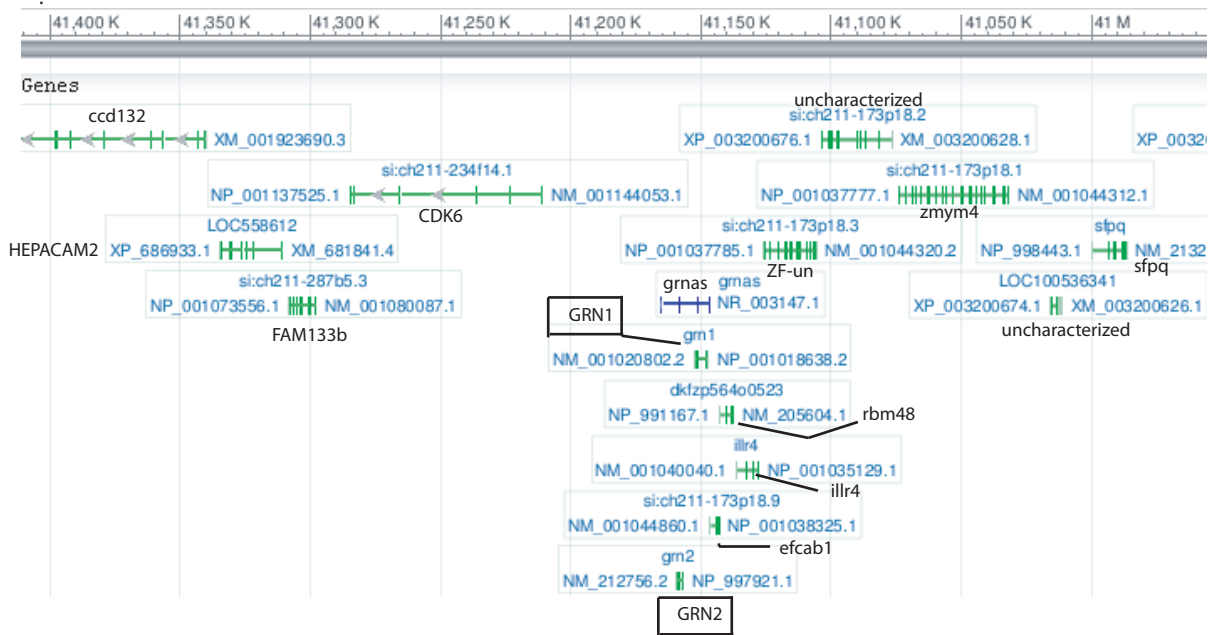

SHORT FORM GRANULINS OF *Oreochromis niloticus* (Nile Tilapia)

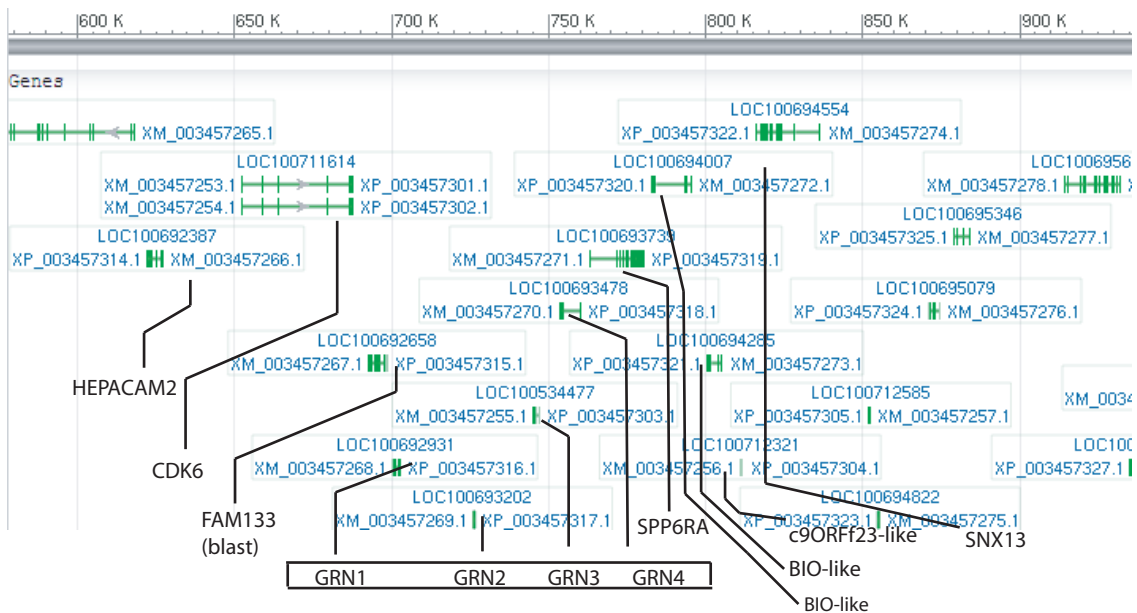

SHORT FORM GRANULIN OF *Takifugu rubripes* (Fugu fish)

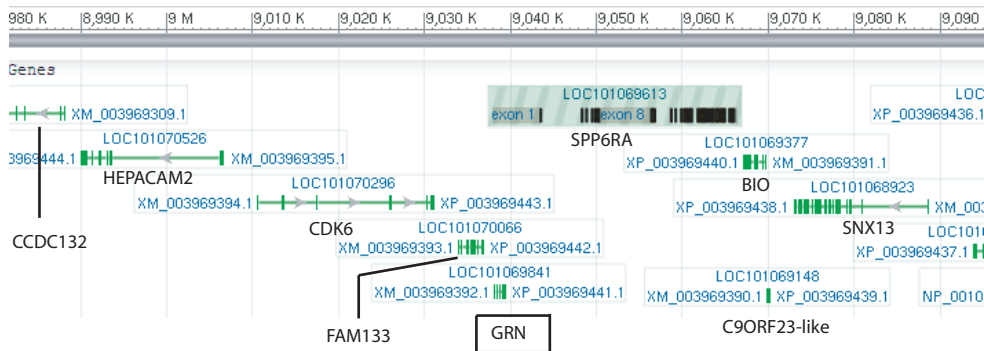

Supplement: pone.0133749.s003.pdf [file pone.0133749.s003.pdf]
