# Supplementary material for: The Evolution of the Secreted Regulatory Protein Progranulin
Source: PubMed Central journal article supplement (PMC4527844; doi:10.1371/journal.pone.0133749), 2015-08-06

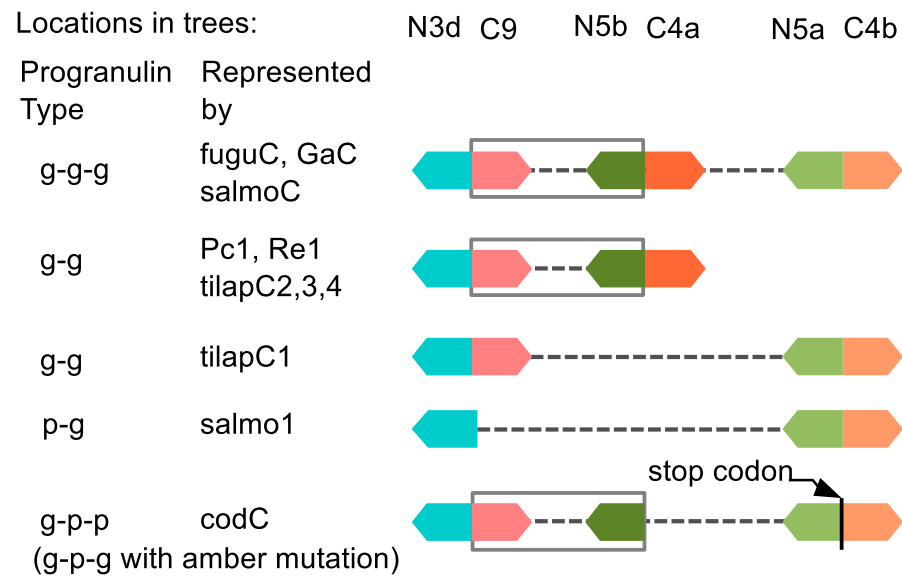

Supplement: pone.0133749.s004.pdf [file pone.0133749.s004.pdf]
