# Supplementary material for: The Evolution of the Secreted Regulatory Protein Progranulin
Source: PubMed Central journal article supplement (PMC4527844; doi:10.1371/journal.pone.0133749), 2015-08-06
Supplement: pone.0133749.s007.pdf [file pone.0133749.s007.pdf]

## The evolution of the secreted regulatory protein progranulin: from premetazoan protozoa to humans.

### Sequences used in the phylogenetic analysis for manuscript.

Updated: 2015-04-14 (y-m-d)

- Note 1: A predicted transcript sequence is given only when cDNA data provides less of the coding sequence than predictable from genomic data.
- Note 2: A genomic sequence is provided only in special cases. In most cases the exons and the appropriate database accession code are sufficient.
- Note 3: Predicted sequence (if any) is followed by cDNA data (if any), then exons from genomic data, finally a full genomic sequence if necessary.
- Note 4: The names and abbreviations for the proteins containing Grn modules and Grn-related modules were chosen for illustrations and discussion in the manuscript.
- Note 5: Shorthand to indicate that an exon encodes an N- or C-half uses n or c. Variant forms are indicated by n' or n", for example. There can be no consistency with respect to what kind of variant it is. One must read the annotation with the exon for that information.

#### List of the 48 progranulins described here:

A. queenslandica L A. queenslandica S1 A. queenslandica S2 A. queenslandica S3 Bovine Branchiostoma floridae (I) C. intestinalis (long) C. milii 1 C. milii 2 Chicken Danio rerio 1 Danio rerio 2 Danio rerio A Danio rerio B G. aculeatus A G. aculeatus B G. aculeatus C G. morhua C Green Anole Human L. chalumnae A L. chalumnae C N. vectensis O. lobularis O. niloticus A O. niloticus B O. niloticus C1 O. niloticus C2 O. niloticus C3 O. niloticus C4 P. lividus Paralabidochromis chilotes C Petromyzon marinus Grn-related S1 Petromyzon marinus Grn-related S2 Petromyzon marinus Grn-related S3 Petromyzon marinus Grn-related S4 Petromyzon marinus L (Large or Long form) R. esox C S. kowalevskii S. purpuratus S. salar 1 S. salar A S. salar B S. salar C T. rubripes B T. rubripes C T. rubripes D X. tropicalis

00040 **A. queenslandica progranulin L** Short name: **A\_queL** Date entered: 2014-03

**Species:** *Amphimedon queenslandica* (sponge)

**Taxonomy (via NCBI):** Eukaryota; Metazoa; Porifera; Demospongiae; Ceractinomorpha; Haplosclerida; Niphatidae; Amphimedon.

**General Comment:** Four apparent progranulin genes are close together in the genome. This is the first and largest, encoding 15 granulin modules in just 2 exons. At present it seems to be the only one represented by cDNA sequences in the EST database. The other small forms encode 2 or 3 modules, and have just one coding exon. While splicing of the large exon into a downstream granulin sequence is possible (a la ensembl Aqu1.229537), current cDNA evidence only supports termination of the large form in the A\_queL coding exon 2.

#### Protein Sequence

MAVKFVLLLLLFA SVYCRPSLFPQSNLYPQLD VVHCPNSEDLC PANNTCCRLTP ELWGCCPHIDAYCCSDKR  
HCCPRGHPCSADSLNCS DSTTTFFSVLMSFKRQRNRNKPF FESKISDTLSQVAVNVNCTPPGSKESWQCP  
ADHTCCYI STTRRYGCCPIVPATCCPDGRGCCPSGYTCDLTDNCTPPKDSLATLAPTLLIDVRPRPTNVT  
DIICPNGINQCPDGETCCRVS SDDFGCCHF SNAVCCADMKHCCPSGYMCS PNDGNCIRSQVAILKKKPAI  
SISFTNVTVEVHCPDGK VCLDGN TCCQTL SSGSYGCCPREDAVCCADRVHCCPHGTECKSDGTCTRTNEVKK  
TLKLD SVKCPDGGVCLDGETCCRESGYKYGCCSYPDATCCSDGIHCCPSGEICDVARGTCTFYGGSAKAMM  
KKLSFLRSP IKVKNVCPDGGSCPDNDTCCLTGDNKYGCCPQPNANCCADKVHCCPSGYSCNVADGTCTR  
GVSVPMMKKLSSLRSPSDVKNVCPGGRQKCPDDNTCCLES GSYGCCPRDAVCCADKTHCCPNGYTC  
QNDGTCKKDTKVYEALAVVKLDSVKCPDGGVCLDGTCCRESGYKYGCCPYLDATCCSDGIHCCPSGEIC  
DVARGTCTFYGDSAKAMIKKLSFLKSP TKVKNVCPNGRQECPDNDTCCELKSGSYGCCPRADAVCCADKI  
HCCPNGYTCENDGTCKRDSKVYEALAVLKLNTVDCPDGGSCPDNDTCCLTGVDKYGCCPQPNAVCCADKV  
HCCPKDFSCNTADHTCTKGVSVIPMMKKLPTLGSPTKLGKGVVCPNGKNECPDGSTCCSKGDAGYGCCPLA  
NAVCCADQTHCCPNGFSCDASNGTCVKEAPVFSALHKKVFQPLYNSKVKENVCPDGQSECSDINTCCKTDT  
GKYGCCLELPQATCCSDMKHCCPSGYICNSDGS CNRQDSFIQIEAVLIKKNVKVDVTCSDGNTSCKNDQ TCC  
LLKDGRYGCCNLTDANCCGDGIHCCPNGYSCDVAKGTVCVKEASVIPILKMM SVSTQVKDDIKCPDDTVC  
SDNNTCCAKSNSFGCCPSPKATCCADEIHCCPSGTTCDLEGH TCRVSEAKHQPLLHVGSMMKPKVVVNVV

CPSVPGHEEKECSSNSTCCLMSEGNYGCCPFNAVCCDDKKHCCPFDYACNPDDGTCTDKSKGFLYTIPP  
TRMSYKRPLL\*

### Transcript:

**Note:** The transcript sequence predicted from ACUQ01000195.1 is mostly confirmed by EST data. In particular, the single splice is confirmed by one EST sequence, and 18 EST sequences confirm the transcription stop. At present, none support a proposed splice into what we are calling S1 or either of the other apparent small form single coding exon genes.

### Predicted sequence:

**Note:** Predicted from ACUQ01000195.1 from translation start codon to stop codon. The first coding exon probably starts at base 7164, 16 bases before the start codon.

**Derivation:** NCBI wgs ACUQ01000195.1 GI:296313059

```
ATGGCCGTGAAATTCGTTCTTGGCTGCTGTTTGGCTTCAGTTTACTGTCGTCCTTCTCTCCACAAAGCA  
ACCTTTATCCTCAACTGGATGTAAGTTCAGTCCCAATTCTGAGGACCTCTGCCCGGCTAATAATACGTG  
TTGCCGCTTACCCCGGAGCTCTGGGGATGCTGTCACACATAGACGTTACTGCTGCTCTGATAAGCGC  
CACTGCTGTCTCGTGGCCATCCTTGTCCGCGGACTCCTTGAAGTCTCGGACTCTACTACAACCTTCC  
CTTCCGTTTTGATGAGTTTTAAAAGGCAAAGAAACAGAAATAAACCTTCTTTGAAAGTAAAAATTCAGA  
TACATTATCACAAAGTTGCCGTTAATGTGAATTGCACTCCTCCTGGTTCAAAGAGAGCTGGCAGTGTCTT  
GCCGATCATACGTGCTGCTATATTTCAACCACTAGGAGATAAGTTGCTGTCCAATAGTACCTGCAACTT  
GCTGCCCTGATGGAAGAGGATGCTGTCCATCAGGATACACTTGTGACCTAACCGATAATACATGCACTCC  
ACCAAAAAGACTCACTTGCACACTGGCACCAGACTCTAATTGACGTGAGACCTAGACCCACCAACGTTACT  
GATAATAATTTGCCCAATGGGATAAATCAATGTCTGATGGTGAACCTGCTGTGCGGTGAGCAGTGATG  
ATTTCCGGGTGCTGTCAATTTTTCCAAATGCTGTCTGCTGTGCTGATAATGAAGCACTGCTGTCTAGCGGATA  
TATGTGTAGTCCGAATGACGGTAACTGTATAAGGTCTCAAGTGGCTATACTTAAGAAGAAAACCTGCAATT  
AGCATATCCTTCACTAACGTGACTGAAGTCCATTGTCTGATGGTAAAGTATGCTCGATGGCAATACTT  
GCTGTGACAGCCCTCTCTGGTAGCTATGTTGCTGTCTAGGGAAGATGCTGTTTTGTTGTGCTGATAGAGT  
TCACTGCTGTCTCATGGCACTGAATGCAAAAAGTGAATGGCACTTGGCACTAGGACCAATGAGGTAAAGAA  
ACCCTGAAAATTGATTCAGTTAAGTGTCTGATGGTGGAGTTTGTCTTGGATGGTGAACCTGTTGTGCGAG  
AAAGTGGTTATAAATATGGTTGTTGTTCTTATCCTGATGCTACCTGTTGCTCTGATGGAATCCATTGCTG  
TCCCTCAGGAGAGATAATGTGACGTAGCTCGTGGGACTTGTTTTTATGGAGGCTCTGCTAAAAGCAATGATG  
AAGAACTGTCAATTTGAGGTCACCAATTTAAAGTTAAAAATGTGGTTTTGCTGATGGAGGAAGCTGTC  
CTGATGATAATACATGTTGTCTAACTGGTGACAATAAGTATGGGTGCTGTCTCAACCTAATGCTAACTG  
TTGCGCTGATAAAGTCCATTGCTGTCTTCAGGCTATTCTTGTAATGTAGCTGATGGTACTTGTACTAGA  
GGGTCTCTGTTGTACCAATGATGAAGAAATTTGCATCCTTGGAGTCACCATCTGATGTAAAAAATGTGG  
TTTTGCTGTTGGTGGGAGGAGAGTGTCTGATGACAATACTTGTGTGAATTGGAATCTGGTAGCTATGG  
TTGCTGTCTAGACCAGATGCTGTTTGTGTGCTGATAAAACTCACTGCTGTCTAATGGCTATACGTGC  
CAGAACGATGGTACCTGCAAGAAAGACACGAAAGTCTATGAAGCACTGGCAGTTGTGAAACTTGATTGAG  
TTAAGTGTCTGATGGTGGAGTTTGTCTTGTGATGGTCAAACCTTGTGTGAGAAAGTGGTTATAAATATGG  
TTGTTGCTCTTATCTTGTGCTACCTGTTGCTCTGATGGAATCCATTGCTGTCTCCTCAGGAGAGATAATG  
GACGTAGCTCGTGGGACTTGTTTTTACGGAGACTCCGCTAAAGCAATGATCAAGAACTGTCAATCTTGA  
AGTCAACCACTAAAGTTAAAAATGTGGTTTTGCTCTAATGGGAGGCAGGAGTGTCTGATGACAATACTTG  
TTGTGAATTGAAATCTGGTAGCTAAGTTGCTGTCTTAGAGCAGATGCTGTTTGTGTGCTGATAAAAT  
CACTGCTGTCTAATGGCTACACGTGCGAGAACGATGGTACTTGCAGAGAGACTCGAAAGTCTATGAAG  
CTCTGGCAGTTTTGAAACTCAATACAGTTGACTGTCTGATGGGGGAAGCTGTCTGATAAATAATACATG  
TTGTCTAACTGGTGTAGATAAGTACGGGTGCTGTCTCAACCTAATGCTGTCTGTTGCGCTGATAAAGT  
CATTGCTGCCCTAAAGACTTTTTCTTGTAAATACAGCTGATCATACTTGTACTAAGGGGGTCTCTGTTATAC  
CAATGATGAAGAAAGCTTCCAACGTTGGGCTCACCTACTAAATTTAAAAGGGGTTGTATGCCCTAATGGAAA  
GAATGAGTGTCTGATGGTAGCACTTGTGTCAGTAAAGGTGATGCAGGATAAGGCTGTGCCCTTTGGCT  
AATGCTGTTTTGCTGTGCTGATCAAACCCATTGTTGCTCTAATGGTTTTCTCATGTGATGCAAGTAAATGGTA  
CCTGTGTCAAGGAAGCCCTGTATTCTCAGCCTTACACAAAAGTCTTTTACGCTCTGTATAATAGTAAAGT  
CAAAGAAAAATGTCTGCCCTGATGGTCAAAGTGAATGCTCTGATATTAATACATGCTGTAAAGACCGATA  
GGAAAGTATGGCTGTGAGTTACCTCAAGCTACCTGCTGCTCTGATAATGAAGCATTGCTGTCCAAGT  
GTTACATTTGCAATTTCTGATGGCTCCTGTAAATAGGCAAGGATTCCTTTTATACAAATTTGAAGCAGTTCTCAT  
TAAGAATAAGGTAAAGGATGCTACTTGTAGCGATGGCAATACATCGTGTAAAAATGATCAGACTTGTCTGT  
CTTCTTAAAGATGGACGCTATGGTTGCTGTAACTCACTGATGCTAATTGCTGTGGCGATGGGATACATT  
GCTGTCCAAATGGTTACTCGTGTGACGTGGCAAAGGACGCTGTGTAAAAAGAACATCTGTCAATACCAAT  
ACTAAAGAAAAATGATGTCAGTGTCTACTCAAGTAAAGGATGATAAATAATGTCTGATGATACGGTTTTGC  
TCTGACAATAACACTTGTGTAAAGCAAAGTCTAATTCGTTTTGTTGTTGCTCTCACCTAAAGCTACCT
```

GTTGTGCTGATGAGATCCACTGCTGCTCTAGTGGCACAACTTGCATCTTGAAGGCCATACCTGCAGGGT  
CTCAGAAGCAAAGCATCAACCATTACTTTCATGTTGGGAGTATGAAGAAACCAGTCGTCGTTAATGTTGTG  
TGTCCTTCTGTTCCAGGCCACGAGGAGAAGGAGTGCTCTAGTAACAGCACGTGCTGCTTGTATGCTGAAG  
GCAATTATGGTTGCTGCCCTTTTCCGAATGCTGTCTGCTGTGATGACAAGAAGCATTGCTGTCTTTTGA  
TTATGCATGTAACCTGATGATGGAACATGTACAGACAAATCCAAAGGATTCTTTACACCATCCCTCT  
ACAAGGATGAGCTACAAGAGGCCCTCTCTGTAA

**cDNA data:**

**From:** NCBI est: GI:282424200 and GI:282424199

**Note:** This cDNA data confirms the splice between coding exons 1 and 2. gi:282424199 is in gi:282424200  
TCTCGTGGCCATCCTTGTCCGCGACTCCTTGAAGTGCCTCGGACTCTACTACAACCTTCCCTTCCGTT  
TTGATGAGTTTTAAAAGGCAAAGAAACAGAAATAAACCTTCTTTGAAAAGTAAAAATTCAGATACATTAT  
CACAAAGTTGCCGTTAATGTGAATTGCACTCCTCCTGGTTCAAAGAGAGCTGGCAGTGTCTGCCGATCA  
TACGTGCTGCTATATTTCAACCACTAGGAGATATGGTTGCTGTCCAATAGTACCTGCAACTTGTGCCCT  
GATGGAAGAGGATGCTGTCCATCAGGATACACTTGTGACCTAACCGATAATACATGCACCTCCC

**From:** NCBI est: Contig of GI:(282445370, 282447771, 282447773, 282448561, 282448360, 282452022)

**Note:** This cDNA contig encodes granulin modules most of 6 to the start of 12.

ATAATACATGTTTGTCTAACTGGTGACAATAAGTATGGGTGCTGTCTCAACCTAATGCTAACTGTTGCGC  
TGATAAAGTCCATTGCTGTCTTCAGGCTATTCTTGTAAATGTAGCTGATGGTACTTGTACTAGAGGGGTC  
TCTGTTGTACCAATGATGAAGAAATGTCATCCTTGAGGTCACCATCTGATGTAAAAAATGTGGTTTTGTC  
CTGGTGGGAGGCAGAAGTGTCTGATGACAATACTTGTGTGAATTGGAATCTGGTAGCTATGGTTGCTG  
TCTAGACCAGATGCTGTTTGTGTGCTGATAAAACTCACTGCTGTCTAATAGCTATACGTGCCAGAAC  
GATGGTACCTGCAAGAAAGACACGAAAAGTCTATGAAGCACTGGCAGTTGTGAACTTGATTCAGTTAAGT  
GCCCTGATGGTGGAGTTTGTCTTGTATGGTCAAACCTTGTGTGCGAGAAAGTGGTTATAAATATGGTTGTTG  
TCTTATCTTGTATGCTACCTGTTGCTCTGATGGAATCCATTGCTGTCCCTCAGGAGAGATATGTGACGTA  
GCTCGTGGGACTTGTTTTTACGGAGACTCCGCTAAAAGCAATGATCAAGAAACTGTCATTCTTGAAGTCAC  
CAACTAAAAGTTAAAAATGTGGTTTTGTCTAATGGGAGGCAGGAGTGTCTGATGACAATACTTGTTTGTA  
ATTGAAAATCTGGTAGCTATGGTTGTCTTAGAGCAGATGCTGTTTGTGTGCTGATAAAAATCACTGC  
TGCTCTAATGGCTACACGTGCGAGAACGATGGTACTTGAAGAGAGACTCGAAAAGTCTATGAAGCTCTGG  
CAGTTTTGAACTCAATACAGTTGACTGTCTGATGGGGAAAGCTGTCTGATAAATAACATGTTGTCT  
AACTGGTGTAGATAAGTACGGGTGCTGTCTCAACCTAATGCTGTCTGTTGCGCTGATAAAGTCCATTGC  
TGCCCTAAAAGACTTTTCTTGTAAATACAGCTGATCATACTTGTACTAAGGGGGTCTCTGTTATACCAATGA  
TGAAGAAGCTTCCAACGTTGGGCTCACCTACTAAAATTAAGGGGGTTGTATGCCCTAATGGAAAAGATGA  
GTGTCTGATGGTAGCACTTGTGTCAGTAAAGGTGATGCAGGATATGGCTGCTGCCCTTTGGCTAATGCT  
GTTTGTGTGCTGATCAAACCCATTGTTGTCTAATGGTTTTCTCATGTGATGCAAGTAATGGTACCTGTG  
TCAAGGAAGCCCTGTATTCTCAGCCTTACACAAAAGTCTTTACGCCCTCTGTATAATAGTAAAAGTCAAAGA  
AAATGTCTGCCCTGATGGTCAAAGTGAATGCTCTGATAT

**From:** NCBI est: Contig of GI:(282431968, 282442850, 282431967, 282461281, 282448361, 282448074, 282447774,  
282436548, 282446597, 282447772, 282445371, 282428021, 282428020, 282452023, 282465071, 282448562,  
282461280, 282436547, 282465070, 282446596, 282442849, 282448073)

**Note:** This cDNA contig encodes a little more than the last 7 modules, confirming the termination, and including the 3'ut. There are some differences with the genomic prediction which may be due to allelic differences.

TTGCTCAACCTAATGCTGTCTGTTGTGCTGATAAAGTCCACTGCTGTCTTCAGGCTATTCTTGTAAAT  
ACAGCTGATGGTACTTGTACTAGAGGGTCTCTGTTGTACCGATGATGAAGAACTTACATCCTTGAGGT  
CACTGTCTGATATAAAAAATGTGGTTTTGTCTGATGGGAGGCAGAAGTGTCTGATGACAATACTTGTCTG  
TGAATTGGAATCTGGTAGCTATGGTTGCTGTCTAGAGCAGATGCTGTTTGTGTGCTGATAAAACTCAC  
TGCTGTCTAATGGCTACATGTGCGAGAATAATGGTACCTGCAAGAGAGACTCTAAAAGTCTATGAAGCAC  
TGGCAGTTGTGAGACTTGTGAAAGTAAAGTGTCTGATGGGGAAAGCTGTCTGATAAATAACATGTTG  
TCCAACCTGGTGAAGATAAGTATGGGTGTTGTCTCAACCTAATACTGTCTGTTGTGCTGATAAAGTCCAT  
TGCTGCCCTAAAAGACTTTTCTTGTAAACACAGCTGATCATACTTGTACTAAGGGGGTCTCTGTTATACCAA  
TGATGAAGAAGCTTCCAACGTTGGGCTCACCTACTAATTTTAAAGGGGGTTGTATGCCCTAATGGAAAAGGA  
TGAGTGTCTGATGGTAGCACTTGTGTCATTAGAGGTGATGCAAAAAGATGGCTGCTGTCTTTGGCTGGT  
GCTGTTTGTGTGCTGATCAAACCCATTGTTGTCTAATGGTTTTCTCATGTGATGCAAGTAATGGTACCT  
GTGTCAAAGAAGCTCTGTATTCTCAGCCTTACACAAAAGTCTTTACGCCCTCTGTATAATAGTAAAAGTCAA  
AGAAAATGTCTGCCCTGATGGTCAAAGTGAATGCTCTGATATTAATACATGCTGTAAGACCGATACAGGA  
AAGTATGGCTGCTGTGAGTTACCTCAAGCTACCTGCTGCTCTGATATGAAGCATTGCTGTCCAAGTGGTT  
ACATTTGCAATTTAATGGCACCTGTAATAGGCAGGATTCAATTTATACCAATTGAAGCAGTTCTCATTTAA  
GAATAAGGTAAAGGATGTCACCTGTAGCGATGGCAGTACATCGTGAAAAATGATCAGACTTGTGTCTT

CTTAAAGATGGACGCTACGGTTGCTGTAACCTCACTGATGCCAATTGCTGTGGTGATGGGATACATTGCT  
GTCCAAATGGTTACTTGTGTGACGTGGCACAAGGCACGTGTGTAAGAAAGCATCAGTCATAACCAATACT  
GAAGAAAATGATGTCAGTGTCTACTCAAGTAAAGGGTGTATATAAAATGTCTGATGATACGGTTTGTCTCT  
GACAATAACACTTGTCTGTAACGAAAGTCTAATTCGTTTGGTTGTTGTCCTTACCTAAAAGCTACCTGTT  
GTGCTGATGAGGTCCACTGCTGTCTAGTGGCACAACCTGTGATCTTGAAGGTCATACATGCAGGGTCTC  
AGAAGCAAAGCATCAACCATTACTTCGTGTTGGGAGTATGAAGAAACCGGTCGTCGTTAATGTTGTGTGC  
CCTTCTGTTCCAGGCCACGAGGAGAAGGAGTGTCTAGTAAACAGCACATGCTGCTTGATGTCTGAAGGCA  
ATTATGGTTGCTGCCCTTTCCGAATGCTGTCTGCTGTGATGACAAGAAGCATTGCTGTCCTTTTGTATTA  
TGCATGTAACCCTGATGATGGAACATGTACAGACAAAATCCAAAGGATTCCTTTACACCATCCCTCCTACA  
ACGATGAGCTACAAGAGGCCTCTCTGTAAAGTATCATGACAATAGCTTGCTGTCATTATACGTTGCTATT  
GCTGTATAAAATTTGTTTTCTCCCATATTGCTACATGCATTATACTCCTTATTAATAATTTATTGTGATT  
CAGTCTCAATTCATTGCTAGTATAAATTTGTTGCTTTTTTCTTAAGGATACAATTTTGTGTAAACACTTC  
AAAAAAAAAAAAAAAAAAAA

**Genomic data:**

**Note:** Genomic data (exons).

From NCBI wgs: ACUQ01000195.1 GI:296313059

**Coding exon 1 Exon type: snc**

**Note:** From the start codon

atggcctgaaattcgttctcttctgctgctgtttgcttcagtttactgtcgtccttctctccacaagca  
accttatacctcaactggatgtagttcactgccccattctgaggacctctgcccgctaataatacgtg  
ttgccgtcttaccocggagctctgggatgctgtccacacatagacgcttactgctgctctgataagcgc  
cactgctgctcctcgtggccatccttctccgcgactccttgaactgctcggactctactacaaccttcc  
cttccgttttgatgagttttaaaggcaagaaacagaaataaaccttcttgaagtaaaa

**Coding exon 2 Exon type: ncnncnncnncnncnncnnc**

**Note:** Showing to the stop codon. This exon continues through the 3'ut as confirmed by an EST contig.

tttcagatacattatcacaagttgccgttaattgtaattgcactcctcctggttcaaaagagagctggca  
gtgctcctgccgatcatacgtgctgctatattcaaccactaggagatatggttgcctgtccaatagtaacct  
gcaacttgcctgccctgatggaagaggatgctgtccatcaggatacacttgtgacctaacggataatacat  
gcaactccacaaaagactcacttgcacactggcaccgactctaattgacgtgagacctagaccaccaa  
cgttactgatataatttgcctcaatgggataaatcaatgctcctgatggtgaaacctgctgtcgggtgagc  
agtgatgatttccgggtgctgtcattttccaatgctgtctgctgtgctgatataagcactgctgtccta  
gcggatataatgtagtccgaatgacggtaactgtataaggctcgaagtggctataacttaagaagaaacc  
tgcaattagcatatccttcaactaacgtgactgaagtcatttgcctgatggtgaaagtatgtctcgatggc  
aatacttgcctgctcagacctctctggtagctatggttgcctgctcctagggaaagtatgctgttgcctg  
atagagttcactgctgctcctcatggcactgaatgcaaaagtgatggcacttgcactaggaccaatgaggt  
aaagaagacctgaaacttgattcagtttaagtgtcctgatggtggagtgttgccttgatggtgaaacttgt  
tgtcgagaaagtgggtataaataatggttgttcttatcctgatgctacctgttgcctgatggaatcc  
attgctgtccctcaggagagatatgtgacgtagctcgtgggacttgttttatggaggctctgctaaagc  
aatgatgaagaaactgtcattcttgaggtcaccaattaaagttaaaaatgtggttgcctgatggagga  
agctgctcctgatgataatacatgttgcctaaactggtgacaataagatgggtgctgctcctcaacctaatg  
ctaactgttgcgctgataaaagtccattgctgctcctcaggctattcttgaatgtagctgatggtacttg  
tactagaggggtctctgttgtaccaatgatgaagaaattgtcatccttgaggtcacctctgatgtaaaa  
aatgtggttgcctggtgggaggcagaagtgtcctgatgacaataacttgcctgtgaattggaatctggtg  
gctatggttgcctgctagaccagatgctgttgcctgctgctgataaaaactcactgctgctcctaatggcta  
tacgtgccagAACGATGGTACCTGCAAGAAAGACACGAAAGTCTATGAAGCACTGGCAGTTGTGAAACTT  
GATTCAGTTAAGTGTCTGATGGTGGAGTTTGTCTTGATGGTCAAACCTGTTGTGCGAGAAAGTGGTTATA  
AATATGGTTGTTGCTTATCTTGATGCTACCTGTTGCTCTGATGGAATCCATTGCTGTCCCTCAGGAGA  
GATATGTGACGTAGCTCGTGGGACTTGTTTTACGGAGACTCCGCTAAAGCAATGATCAAGAAACTGTCA  
TTCTTGAAGTACCAACTAAAGTTAAAAATGTGGTTTGCCTAATGGGAGGCAGGAGTGTCTGATGACA  
ATACTTGTGTGAATTGAAATCTGGTAGCTATGGTTGCTGCTCCTAGAGCAGATGCTGTTTGTGTGCTGA  
TAAAAATCACTGCTGCTCCTAATGGCTACACGTGCGAGAACGATGGTACTTGAAGAGAGACTCGAAAAGTC  
TATGAAGCTCTGGCAGTTTGAAGCTCAATACAGTTGACTGTCTGATGGGGGAAAGCTGTCTGATAATA  
ATACATGTTGTCTAACTGGTGTAGATAAGTACGGGTGCTGCTCCTCAACCTAATGCTGTCTGTTGCCTGA  
TAAAGTCCATTGCTGCCCTAAAGACTTTTCTTGAATACAGCTGATCATACTTGTACTAAGGGGGTCTCT  
GTTATACCAATGATGAAGAAGCTTCCAACGTTGGGCTCACCTACTAAATAAAAAGGGGTTGTATGCCCTA  
ATGGAAAAGATGAGTGTCTGATGGTAGCACTTGTGCAAGTAAAGGTGATGCAGGATATGGCTGCTGCC  
TTTGGCTAATGCTGTTTGTGCTGCTGATCAAACCCATTGTTGCTCCTAATGGTTTCTCATGTGATGCAAGT

aatggtacctgtgtcaaggaagcccctgtattctcagccttacacaaaagctcttcagcctctgtataata  
gtaaaagcaaaagaaatgtctgccctgatggtcaaagtgaatgctctgatattaatacatgctgtaagac  
cgatacaggaaagataggctgctgtgagttacctcaagctacctgctgctctgatatgaagcattgctgt  
ccaagtggttacatttgcaattctgatggctcctgtaataggcaggattcctttatacaaaattgaagcag  
ttctcattaagaataaggtaaaggatgctactgtagcgatggcaatacatcgtgtaaaaaatgatcagac  
ttgctgtcttctaaagatggacgctatggttctgtaacctcactgatgctaattgctgtggcgatggg  
atacattgctgtccaaatggttactcgtgtgacgtggcaaaaggcacgtgtgtaaaagaagcatctgtca  
taccaataactaaagaaatgatgtcagtgctactcaagtaaggatgatataaaatgctctgatgatac  
ggtttgctctgacaataacacttctgtgtaaaagcaaaagctcaattcgtttggttgttgccttcacctaaa  
gctacctgttgtgctgatgagatccactgctgtcctagtggcacaacttgcgatcttgaaggccatacct  
gcagggtctcagaagcaaaagcatcaaccattacttcatgttgggagatgaagaaaccagtcgtcgttaa  
tggtgtgtgtccttctgttccaggccacgaggagaaggagtgctctagtaacagcacgtgctgcttgatg  
tctgaaggcaattatggttctgtcccttttccgaatgctgtctgctgtgatgacaagaagcattgctgtc  
cttttgattatgcatgtaaccctgatgatggaacatgtacagacaaaatccaaaggattcctttacaccat  
ccctcctacaaggatgagctacaagaggcctctcctgtaa

**Genomic sequence note:** A genomic sequence is not presented (see note 2 in header).

---

00041 **A. queenslandica progranulin S1** Short name: **A\_queS1** Date entered: 2014-03

**Species:** *Amphimedon queenslandica* (sponge)

**Taxonomy (via NCBI):** Eukaryota; Metazoa; Porifera; Demospongiae; Ceractinomorpha; Haplosclerida; Niphatidae; Amphimedon.

**General Comment:** Four apparent progranulin genes are close together in the genome. This is the second, which encodes a progranulin with 2 modules in a single exon. Its coding starts about 810 bases after the stop codon, and 600 bases after the cDNA-supported 3'ut end of the preceding large progranulin gene (A\_queL). The translation begins with a signal-peptide-like sequence, but it does not score well as a signal sequence. There is a possible splice from just before the A\_queL stop codon into the beginning of A\_queS1 (see ensembl Aqu1.229537), but so far all cDNA data support the termination of the large form and its 3'ut in A\_queL exon 2.

### Protein Sequence

MKVTILSFFFAAICLTNARMVSYVKDIPCDNGSCPLGDTCCSGDAKPCCLPNAVCCGDSKCCPSGYTCS  
PPHCVREEDNHITLMLSSSDIPQKSNNVTIIPCNTGYCPDGDTCPCDGCPCDYNGVCCYNGFCCTPTGYVC  
SRVDCVRSAGEGLNVVPQRKILLPHTKKNKD\*

### Transcript:

**Note:** The transcript sequence is predicted from ACUQ01000195.1. There is as yet no cDNA data for this gene.

### Predicted sequence:

**Note:** Predicted from ACUQ01000195.1 from translation start codon to stop codon. It is the same as the single coding exon sequence.

**Derivation:** NCBI wgs ACUQ01000195.1 GI:296313059

ATGAAGGTCACTATTTCTTTTCTTTTCTTTGCTGCAATTTGCTGACCAATGCAAGAATGGTCAGTTATG  
TAAAAGATATACCTTGTGATAATGGTTCATGTCCTCTTGGTGACACATGCTGCTCTGGTGATGCAAAGCC  
ATGCTGTCCTTTACCTAATGCTGTCTGCTGTGGTGATAGCAAAATGCTGTCCCTCTGGCTACACTTGCAGT  
CCACCTCACTGTGTCAGGGAAGAAGATAATCACATTACTCTAATGCTGTCTTCATCAGACATTCCACAAA  
AGAGCAACAATGTCACAATCATTCTTGAACACTGGATACTGCCCTGATGGTGATACATGCTGCCCTGA  
TGGTTGTTGTCCTGACTATAATGGCGTCTGCTGCTATAACGGATTTTGTCTGCTACTGTTACGCTCTGC  
AGCAGGGTTGATTGTGTGCGAAGTGCAAAGGAAGGTTTAAATGTTGTGCCTCAAAGAAAAATCCTTCTCC  
CACATACCAAGAAGAATAAAGATTAA

### cDNA data:

**cDNA sequence data:** No cDNA data (or empty cDNA entry).

### Genomic data:

**Note:** Genomic data (exons).

From NCBI wgs: ACUQ01000195.1 GI:296313059

**Coding exon 1** Exon type: **snnc**

**Note:** From start codon to stop codon.

```
atgaaggtcactattctttctttttcttttctttgctgcaatttgtctgaccaatgcaagaatggtcagttatg
taaaagataataccttgtgataatggttcatgtcctcttggtagacacatgctgctctggtgatgcaaagcc
atgctgtcctttacctaataatgctgtctgctgtggtgatagcaaatgctgtccctctggctacacttgcagt
ccacctcactgtgtcaggaagaagataatcacattactctaataatgctgtcttcatcagacattccacaaa
agagcaacaatgtcacaatcattccttgcacaactggatactgccctgatggtgatacatgctgccctga
tggttgttgcctgactataatggcgtctgctgctataacggatcttctgctgctcactggttacgtctgc
agcaggttgattgtgtgcgaagtgcaaaggaaggttttaaatgttgtgctcaagaaaaatccttctcc
cacataccaagaagaataaagattaa
```

**Genomic sequence note:** A genomic sequence is not presented (see note 2 in header).

---

00042 **A. queenslandica progranulin S2** Short name: **A\_queS2** Date entered: 2014-03

**Species:** *Amphimedon queenslandica* (sponge)

**Taxonomy (via NCBI):** Eukaryota; Metazoa; Porifera; Demospongiae; Ceractinomorpha; Haplosclerida; Niphatidae; Amphimedon.

**General Comment:** Four apparent progranulin genes are close together in the genome. This is the third, which encodes a progranulin with 2 modules in a single exon. Its coding starts about 886 bases after the stop codon of the preceding small progranulin gene (A\_queS1).

### Protein Sequence

```
MKVAILLSFVFAAICLTNARMVSYVKDIPCDGGTCDPDGDTCCSGDAKPCCPNPGVCCGGGKCCRSGYTCR
PPYCIKDDAHYESVILSKSRTVEKMKHYQKSSLTGIPCNNGECPDGYNTCCPNEPKPCCSYNGVCCGDG
TCCPSGYTCSGDSCLREDAHEKGVTRMLSTSGLPRKGNNVTDIPCNGDSCPRKKDKNY*
```

### Transcript:

**Note:** The transcript sequence is predicted from ACUQ01000195.1. There is as yet no cDNA data for this gene. It begins with a signal peptide which is skipped by ensembl Aqu1.229538, which begins 20 codons downstream.

### Predicted sequence:

**Note:** Predicted from ACUQ01000195.1 from translation start codon to stop codon. It is the same as the single coding exon sequence.

**Derivation:** NCBI wgs ACUQ01000195.1 GI:296313059

```
ATGAAAGTTGCTATTCTTTCTTTTGTCTTTGCTGCAATTTGTTTGACCAATGCAAGAATGGTCAGTTATG
TAAAAGATATACCTTGCATGGAGGTACATGCCCTGATGGGGACACGTGCTGCTCTGGTGATGCAAAGCC
ATGCTGTCTACACCTAATGGTGTGTTGCTGTGGTGGCGGCAAAATGCTGTGCTCTGGCTACACTTGCCGT
CCACCTTACTGTATCAAGGACGACGCTCATTATGAATCAGTGATTCTATCCAAGTCTCGTACAGTTGAAA
AGATGAAGCATTACCAAAAAATCTTCCCTGACTGGCATTCCATGTAATGGAGGAGAAATGCCCTGATGGTTA
CAACACATGCTGTCCCAATGAACCTAAACCATGTTGCTCATATTCTAATGGTGTCTGCTGTGGTGATGGT
ACTTGCTGCCCTCTGGGTACACCTGCAGTGGAGACTCCTGTCTCAGGGAAGATGCACATGAGAAAAGGTG
TTACTCGAATGCTATCTACATCAGGCCCTTCCAAGAAAAGGGCAACAATGTCACAGACATTCTTGCAATGG
AGATTCTGTCCACGCAAGAAGGATAAAAAATTACTGA
```

### cDNA data:

**cDNA sequence data:** No cDNA data (or empty cDNA entry).

### Genomic data:

**Note:** Genomic data (exons).

From NCBI wgs: ACUQ01000195.1 GI:296313059

**Coding exon 1 Exon type: sncnc**

```
atgaaagttgctattctttcttttcttttctttgctgcaatttgtttgaccaatgcaagaatggtcagttatg
taaaagataataccttgcgatggaggtagatgccctgatggggacacgtgctgctctggtgatgcaaagcc
atgctgtcctacacctaataatggtgtttgctgtggtggcggcaaatgctgtcgctctggctacacttgcctg
ccaccttactgtatcaaggacgacgctcattatgaatcagtgattctatccaagtctcgtacagttgaaa
agatgaagcattaccaaaaaatcttccctgactggcattccatgtaatggaggagaatgccctgatggtta
caacacatgctgtcccaatgaacctaaacctggtgctcatattctaataatggtgtctgctgtggtgatggt
acttctgctcccctctgggtacacctgcagtgagactcctgtctcagggaaagatgcacatgagaaaaggtg
```

ttactcgaatgctatctacatcaggccttccaagaaagggaacaatgtcacagacattccttgcaatgg  
agattcctgtccacgcaagaaggataaaaaattactga

**Genomic sequence note:** A genomic sequence is not presented (see note 2 in header).

00043 **A. queenslandica progranulin S3** Short name: **A\_queS3** Date entered: 2014-03

**Species:** *Amphimedon queenslandica* (sponge)

**Taxonomy (via NCBI):** Eukaryota; Metazoa; Porifera; Demospongiae; Ceractinomorpha; Haplosclerida; Niphatidae; Amphimedon.

**General Comment:** Four apparent progranulin genes are close together in the genome. This is the fourth, which encodes a progranulin with 3 modules in a single exon. Its coding starts about 620 bases after the stop codon of the preceding small progranulin gene (A\_queS2).

### Protein Sequence

MKVAILSLVLAAICLTNARMVSYVKDIPCNNGGTCPDGDTCCSGDSLPCPCPTSNVCCGDNHCCPSGTTCS  
PPFCIGKDAELSSFVLPKIHGAEKMKLNSQPTLTDIPCEGGYCPDGDTCSSNEPKPCPTSNVCCGDGT  
CCPSGYTCTPTSCIREDAHKKGVTLMLSSSGLPRKDNVTDIPCGGGKSCRDRGETCCPTGCCPESNGVCC  
SNDACCPGYS CSDSDGVHCDPDAKDGFAVLQTKIPLGRTRKTKN\*

### Transcript:

**Note:** The transcript sequence is predicted from ACUQ01000195.1. There is as yet no cDNA data for this gene. It begins with a signal peptide which is skipped by ensembl Aqu1.229539, which begins 20 codons downstream.

### Predicted sequence:

**Note:** Predicted from ACUQ01000195.1 from translation start codon to stop codon. It is the same as the single coding exon sequence.

**Derivation:** NCBI wgs ACUQ01000195.1 GI:296313059

ATGAAGGTTGCTATTCTTTCTTGTCTTAGCTGCAATTTGTTTGACCAATGCAAGAATGGTCAGTTATG  
TAAAAGATATACCTTGCAATGGAGGCACATGTCCTGATGGTGACACATGCTGCTCTGGTGATTCATTGCC  
CTGCTGTCTACATCTAACGGTGTCTGCTGTGGTGATAACCATTGCTGTCTTCTGGAACCACTTGCAGT  
CCACCTTTCTGTATTGGGAAAAGATGCCGAGTTGTCATCTTTTGTCTACAAAAAATTCATGGTGCTGAAA  
AGATGAAACTAAAACACCAACCCACACTGACAGATATACCTTGCGAAGGAGGTTACTGTCTGATGGTGA  
CACATGCTGCTCTAATGAACCAAAGCCATGCTGTCTTACATCTAATGGTGTCTGCTGTGGTGATGGTACT  
TGCTGCCCTCTGGGTACACCTGCACTCCAACCTCCTGTATCAGGGAAGATGCACATAAGAAAAGGTGTCA  
CTCTAATGCTATCTTCATCAGGCCTTCCAAGAAAAGGACAACAATGTCACAGACATTCCTTGTGGCGGTGG  
TAAGTCTTGTGCTGATGGTGAAAACATGCTGTCTACTGGTTGCTGTCTGAAATCTAACGGTGTCTGCTGT  
AGTAATGATGCATGCTGTCTTCTGGTTACTCCTGTGACAGTGATGGGGTCCATTGTGATCCAGATGCAA  
AGGATGGTTTTGCAGTACTTCAAACAAAAATCCCTCTTGGACGTACTAAGAAGACTAAAAATTAA

### cDNA data:

**cDNA sequence data:** No cDNA data (or empty cDNA entry).

### Genomic data:

**Note:** Genomic data (exons).

From NCBI wgs: ACUQ01000195.1 GI:296313059

**Coding exon 1 Exon type: sncnc**

**Note:** From the start codon to the stop codon.

atgaagggtgctattctttctcttcttagctgcaatttgtttgaccaatgcaagaatggtcagttatg  
taaaagatataaccttgcaatggaggcacatgctcctgatggtgacacatgctgctctggtgattcattgcc  
ctgctgtcctacatctaacggtgtctgctgtggtgataaccattgctgtccttctggaaccacttgcagt  
ccacctttctgtattgggaaaagatgccgagttgtcatctttgttctacaaaaattcatggtgctgaaa  
agatgaaactaaaactcacaacccacactgacagatataaccttgcaaggaggttactgtcctgatggtga  
cacatgctgctctaataaaccaaagccatgctgtcctacatctaataggtgtctgctgtggtgatggtact  
tgctgccctctgggtacacctgcaactccaacctcctgtatcagggaaagatgcacataagaaaaggtgtca  
ctctaatagctatcttcatcaggccttccaagaaaggacaacaatgtcacagacattccttgtggcggtgg  
taagtcttgtcgtgatggtgaaacatgctgtcctactggttctgctgtcctgaatctaacggtgtctgctgt  
agtaatgatgcatgctgtccttctggttactcctgtgacagtgatggggtccattgtgatccagatgcaa

aggatggttttgcagtacttcaaacaaaaatccctcttggacgtactaagaagactaaaaattaa

**Genomic sequence note:** A genomic sequence is not presented (see note 2 in header).

00002 **Bovine progranulin** Short name: **B\_tau or bovine** Date entered: 2014-03

**Species:** *Bos taurus (cattle)*

**Taxonomy (via NCBI):** *Eukaryota; Metazoa; Chordata; Craniata; Vertebrata; Euteleostomi; Mammalia; Eutheria; Laurasiatheria; Cetartiodactyla; Ruminantia; Pecora; Bovidae; Bovinae; Bos.*

**General Comment:** Well documented transcript and genomic sequences

**Protein Sequence**

MWTLVSWVALVTGLVVGTQCPDGLCPVACCLDPNGATYSCCNPVQDQRPVLSQRLGRPCQADGHCAPG  
YSCILTVSGTSSCCPFPEAVSCGDGRHCCPRGFHCNADGRSCFQRSDTKPLDAVQCPDKQFQCPNNSSTCC  
TMPDGSWGCCPMPQASCCEDKIHCCPHGTSCDLARGRCLSATGTHPLAKKMPAHKTKSSVILCPDGGQSQ  
PDGSTCCKLPTGKYGCCPMPNAICCSDDLHCCPQNTVCDLTQSKLSKENATDLLTKLPAHTVQDVKCDM  
EVSCPDYDTCRLQSGAWGCCPFVQAVCCEDHVHCCPSGFRCDTEKGVCEQGTQVPMKKAPAHLSLLD  
LGAVEGDVPCDNTVSCPSSTTCCRLKSGEWACCPAPEAVCCSDHQHCCPKGYTCVARRHCKRKGQVVTGL  
DKVPAHRASPSHPRDMGCDQHTSCPVGQTCPSLRGAWACCKLPHAVCCEDRQHCCPAGYTCNVKARSCE  
KEVDVPHPAVRLASGPPVGMGNVECGARHFCHDNQTCPPDSQGGWACCPYRKGTCGGDKHHCCPSGFRCA  
ARGTKCLRREALRWDAPWRDPTPRQLL\*

**Transcript:**

The cDNA data define the transcript well (below), so no predicted sequence is required.

**cDNA data:**

**From:** NCBI: BC105334

**Note:** cDNA sequence data:

GAGAGATCGCGGACCCCGACGCAGGTGGACCATGTGGACTTTGGTGAGCTGGGTGGCCTTAGTGACAGGG  
CTGGTGGTTGGAACACAGTGGCCAGACGGTCAGCTCTGCCCTGTGGCCTGCTGCTGGACCCGAATGGAG  
CCACCTACAGCTGCTGCAATCCCGTTTCAGGACCAGCGCCGCTCTGTGCTGAGCCAGCGTCTGGGCCGACC  
CTGCCAGGCCGATGGCCACTGCGCTCCTGGCTACTCCTGCATCCTCACTGTCTCAGGGACCTCCAGCTGC  
TGCCCGTTCCAGAGGCTGTGTCATGTGGGGATGGCCGCCACTGTTGCCCGGGGCTTCCACTGCAACG  
CTGACGGGCGGTCTGCTTCCAAAGATCAGATACCAAGCCCTGGATGCCGTCCAGTGCCCGACAAAACA  
GTTCCAGTGCCCAACTCCTCCACGTGCTGCACCATGCCTGATGGCTCCTGGGGATGCTGCCCCATGCC  
CAGGCTTCTTGCTGTGAAGACAAGATACACTGCTGCCCCATGGCACGTCTCTGTGACCTGGCTCGTGGCC  
GCTGTCTCTCGGCCACAGGCACCCACCCCTGGCTAAGAAGATGCCTGCACACAAGACTAAAAGTTTCA  
GATCTTATGCCAGATGGACAGTCCAGTGGCCGATGGTTCTACCTGCTGCAAGCTGCCCACTGGAAA  
TATGGCTGCTGCCGATGCCCAATGCCATTTGCTGCTCCGACCACCTGCACTGCTGCCCCAGAACACTG  
TGTGTGACCTGACCCAGAGTAAGTGCTCTCCAAGGAGAACGCTACGGACCTCCTACCAAGCTGCCCGC  
ACACACAGTGCAGGATGTCAAGTGCACATGGAGGTGAGCTGCCAGACGACTACACCTGCTGCCGCCTA  
CAGTCCGGGGCTGGGGCTGCTGCCCTTTTGTGAGGCCGTGTGCTGTGAGGACCATGTGCACTGCTGCC  
CGTCCGGGTTTAGGTGTGACACAGAGAAGGGTGTGTGTGAGCAGGGGACCCGCCAGGTGCCGTGGATGAA  
GAAAGCCCCAGCCACCTCAGCCTGCTGGACCTCGGAGCCGTGGAGGGGGACGTCCCCTGTGATAACGTC  
ACCAGCTGTCTTCTTCCACTACCTGCTGTCGACTCAAGTCTGGGGAGTGGGCCTGCTGTCTGCTCCAG  
AGGCTGTCTGCTGCTCGGACCACCAGCACTGCTGCCCCAAGGGCTACACGTGTGTGGCCAGAAGGCACTG  
TAAGAGGGGGAAAACAGGTGGTGACCGGACTGGACAAAAGTGCCTGCCACAGGGCTCCCCGTCCCACCC  
AGAGACATGGGCTGTGACCAGCACACCAGCTGCCCGTGGGGCAGACCTGCTGCCCGAGCCTGAGGGGGG  
CCTGGGCTGCTGCAAGTTGCCGCACGCCGTGTGCTGTGAGGACCGCCAGCACTGCTGCCCGGCTGGCTA  
CACCTGCAACGTGAAGGCCGATCCTGTGAGAAGGAGGTGGACCTGTGACCCCTGCCGTCCGCTGGCC  
AGCGGCCCTCCTGTGGGCATGGGGAACGTGGAGTGTGGGGCGAGGCACTTCTGCCACGATAACCAGACCT  
GCTGCCAGACAGCCAGGGGGGCTGGGCTGCTGCCCTACCGCAAGGGCACCTGTTGTGGGGACAAGCA  
TCACTGCTGTCCAGTGGCTTCCGCTGTGCAGCCAGGGGGACCAAGTGTACGTCGGGAGGCCCTGCGC  
TGGGACGCTCCTTGGAGGGACCCGACACCAGACAGCTGCTGTGAGGAGGGCTGAGGACTGAAGACACT  
TGGCAGCCCTCAGGACCTGCTCAGAGGGTCCCCACTGCTCAGGCCTCCCAGCACCTTCCCCACCAC  
ATTCTCCAGACCCCTTCTGAGTCCCCATCACCTGGGAGGTGGGGCTCAATCTAAGGCTCCCTTA  
TGCCAAGGTGGTGGTGGGGGGGGGCTGTGGCAAAAAGCCACGTTTCAAGCTGCCATCCCCTCCCCAATT  
TCTGTCAACTCTGTGGCCAGGTGCTCTTCTATCCACGGGTGTGCGTGCCTGTGTATGTGTGTGTGTG  
CGTGTGCAATAAAGTTTGTACACTTTCAAAAAAAAAAAAAAAAAAAAAAAAAAAAAAAAAAAAAAAAAA



## Genomic data:

**Note:** Genomic data (exons).

From NCBI: NC\_007317

### Coding exon 1 Exon type: sn

**Note:** from start codon

ATGTGGACTTTGGTGAGCTGGGTGGCCTTAGTGACAGGGCTGGTGGTTGGAACACAGTGCCCAGACGGTC  
AGCTCTGCCCTGTGGCTGCTGCCTGGACCCGAATGGAGCCACCTACAGCTGCTGCAATCCCGTTTCAG

### Coding exon 2 Exon type: n\*

**Note:** \* Encodes the N-half of a 10 cys module

GACCAGCGCCGTCTGTGCTGAGCCAGCTCTGGGCGACCTGCCAGGCCGATGGCCACTGCGCTCCTG  
GCTACTCCTGCATCCTCACTGTCTCAGGGACCTCCAGCTGCTGCCCGTTCCAGAG

### Coding exon 3 Exon type: c\*

**Note:** \* Encodes the C-half of a 10 cys module

GCTGTGTCATGTGGGGATGGCCGCCACTGTTGCCCCGGGGCTTCCACTGCAACGCTGACGGGGCGGTCTT  
GCTTCCAAAGATCAG

### Coding exon 4 Exon type: n

ATACCAAGCCCCTGGATGCCGTCCAGTGCCCCGACAAACAGTTCCAGTGCCCCAACTCCTCCACGTGCTG  
CACCATGCCTGATGGCTCCTGGGGATGCTGCCCCATGCCCCAG

### Coding exon 5 Exon type: c

GCTTCTTGCTGTGAAGACAAGATACACTGCTGCCCCATGGCACGTCCTGTGACCTGGCTCGTGGCCGCT  
GTCTCTCGGCCACAGGCACCCACCCCTGGCTAAGAAGATGCCTGCACACAAGACTAAAAGTTCAG

### Coding exon 6 Exon type: n

TCTTTCCCCCTTCCAGTGATCTTATGCCAGATGGACAGTCCCAGTGCCCCGATGGTTCTACCTGCTGCAA  
GCTGCCCACTGGAAGTATGGCTGCTGCCCGATGCCCAAT

### Coding exon 7 Exon type: c

GCCATTTGCTGCTCCGACCACCTGCACTGCTGCCCCAGAACACTGTGTGTGACCTGACCCAGAGTAAGT  
GCCTCTCCAAGGAGAACGCTACGGACCTCCTCACCAAGCTGCCCGCACACACAG

### Coding exon 8 Exon type: n

TGCAGGATGTCAAGTGCACATGGAGGTGAGCTGCCAGACGACTACACCTGCTGCCGCTACAGTCCGG  
GGCCTGGGGCTGCTGCCCTTTTGTGCAG

### Coding exon 9 Exon type: cn

GCCGTGTGCTGTGAGGACCATGTGCACTGCTGCCCCGTCCGGGTTTAGGTGTGACACAGAGAAGGGTGTGT  
GTGAGCAGGGGACCCGCCAGGTGCCGTGGATGAAGAAAGCCCCAGCCACCTCAGCCTGCTGGACCTCGG  
AGCCGTGGAGGGGACGTCCTTGTGATAACGTACCAGCTGTCTTCTTCCACTACCTGCTGTGCACTC  
AAGTCTGGGGAGTGGGCTGCTGTCTGCTCCAGAG

### Coding exon 10 Exon type: cn

GCTGTCTGCTGCTCGGACCACCAGCACTGCTGCCCCAAGGGCTACACGTGTGTGGCCAGAAGGCACTGTA  
AGAGGGGGAAAACAGGTGGTGACCGGACTGGACAAAAGTGCTGCCACAGGGCCTCCCCGTCCCACCCAG  
AGACATGGGCTGTGACCAGCACACCAGCTGCCCGTGGGGCAGACCTGCTGCCGAGCCTGAGGGGGGCC  
TGGCCTGCTGCAAGTTGCCGCAC

### Coding exon 11 Exon type: cn

GCCGTGTGCTGTGAGGACCCAGCACTGCTGCCCCGGCTGGCTACACCTGCAACGTGAAGCCCCGATCCT  
GTGAGAAGGAGGTGGACCTGTGCACCCTGCCGTCCGCTGGCCAGCGGCCCTCCTGTGGGCATGGGGAA  
CGTGGAGTGTGGGGCGAGGCACCTTCTGCCACGATAACCAGACCTGCTGCCAGACAGCCAGGGGGGCTG  
GCCTGCTGCCCTACCGCAAG

### Coding exon 12 Exon type: c

**Note:** to stop codon

GGCACCTGTTGTGGGACAAGCATCACTGCTGTCCCAGTGGCTTCCGCTGTGCAGCCAGGGGGACCAAGT  
GCTTACGTCGGGAGGCCCTGCGCTGGGACGCTCCTTGGAGGGACCCGACACCGAGACAGCTGCTGTGA

**Genomic sequence note:** A genomic sequence is not presented (see note 2 in header).

00004 **Branchiostoma floridae progranulin (I)** Short name: **B\_flo or Brafl** Date entered: 2014-03

**Species:** *Branchiostoma floridae (Florida lancelet)*

**Taxonomy (via NCBI):** *Eukaryota; Metazoa; Chordata; Cephalochordata; Branchiostomidae; Branchiostoma.*

**General Comment:** There are no cDNA data for this progranulin gene. In the middle of the gene there is a long repeat sequence (about 27 repeats) encoding nearly identical granulin modules except that the data indicate frame-shifts within the repeat. It is likely assembly errors were introduced here, but also splice donors and acceptors can be found within the sequence, so it remains to be clarified how the repeat sequence is used in the transcripts. The prediction here for the transcript before and after the repetitive sequence is from the now "obsolete" wgs sequence NW\_002235344 and the current ABEP02018454. A second, distinct transcript with a high level of identity was predicted from the now "obsolete" NW\_002234951. These differences are most likely allelic. In the original analysis we kept track of these two sequences by labelling them A and B, but when this might be confused with the distinct A and B forms found in fish, we used I and II respectively. The latest sequence for this gene at the JGI B. floridae genome project site is estExt\_fgenesh2\_pg.C\_160005. There is only one, and it appears to be a hybrid between our two predictions. For our analysis these differences are not important, except for coding exon 7, which the jgi prediction omits. Except for the middle repetitive sequence, the sequence provided here is from our prediction I. For the splicing within the repeat, we include here the exons predicted in estExt\_fgenesh2\_pg.C\_160005. It encodes repeat modules typical of those encoded by the sequences we used in our analysis.

### Protein Sequence

MRLLIIVLLCSLALCSAVPFPPKGAHQCPDVCQPEETCCCKSNSTLTHGCCPISQATCCSDGLHCCPSGFKCD  
LSQNAQLQGDLTLNWSPKMEVKFRATITCPGGTHDCPENTTCCCLTAKGDYGCCPLAKAACCKDHTHCCPS  
GFKCDESAGKCRQGNRTLPPFLKFAARPRFVANQEQVCPGGKSTCPTTSTCCMLKNGKYGCCPMEKAVCC  
EDKVHCCPSGFTCAATKCKKGEYSIPLFSKTEAKIRQMHPAKDAKVVTCPDGLSACKDNTTCCCKDDTGEY  
GCCPIPQAECCNDQIHCCPAGFTCQTEKGGKSKGGVVVPLLTKTRADVLSEEVSVHCDDGSACPNHHTC  
CKTQTGKYGCCPLPKAVCCQDEIHCCPDGYTCDTAKSRCIKGDMTLPWLEKRPSKSSRKDPGKPPPGAV  
VCPDHVMPDNNTCCLLQDGSYGCCPEPHAVCCSDRKHCCPQGYTCDTSQKCLQGYRTIPWIENTVAP  
PNKVVTPYKVEPPVNPIDCDEEGKVKCPDKNTCCCKTTGEWGCCPLEKALCCEDKVHCCPHGTVCNKTS  
ECHYDPGTSQAWVQKTPPLLDVRRDDVKDVPDVGKSAACEEDYTCCKNSTGYGCCPF SRAVCCNDIVHCCP  
QHYTCNSGAPGTCIHNFLLPTVPMAKKTPKMQVQLHNEEIEITDNEILNNVRCDFHECPANNTCCCKLSSGQ  
WGCCPLPSAVCCDDHVHCCPEDTTCSVSTGKCHKGDASITWFEKLPKATVQNDPNIMCDATHECPSKHTC  
CKLASQWGCCPLPSAVCCNDHVHCCPEGTTCKVSTGKCEKGDITLAWFEKTSAITVEDAPNVMCDATHE  
CKAKETCCCKLKSQWGCCPLPKAVCCDDKVHCCPEGTTCSVSTGKCNKGDVSLAWFEKSPAKNVQNDQNI  
MCDATHECPSKHTCCKLASQWGCCPLPSAVCCNDHVHCCPEGTTCSVSTGKCEKGEITLAWFEKTSAIT  
VEDAPNVMCDATHECKAKETCCCKLASQWGCCPLPKAVCCDDKVHCCPEGTTCSVSTGKCNKGDISFPWF  
EKVPANNVQNVQNMKCDATHECPSKHTCCKLASQWGCCPLPSAVCCNDHVHCCPEDTTCEVSSGKCKRK  
DISFPWFEEKVPAITTAQEVSNVKCDATHECPSKHTCLLSAVTTTSTAVPKILHVKCLLESEKGENSLPWF  
EKTSAITVEDAPNVMCDATHECKAKETCCCKLASQWGCCPLPKAVCCDDHVHCCPEGTTYTTCEVSSGKC  
KRKDSIPWFEEKVPAITTEEVSNVKCDATHECPSKHTCCKLASQWGCCPLPSAVCCNDHVHCCPEDTTC  
SVSTGKCEKGEISLPWFEEKTSAITVEDAPNVMCDATHECKARETCCCKLESQWGCCPLPKAVCCDDKVC  
CPEGTTCSVSTGKCHKGDVSIWFEKVPAITAEVEVSNVKCDATHECPSKHTCCKLASQWGCCPLPSAV  
CCNDHVHCCPEDTTCEVSSGKCKRKDASIPWFDKVPAITTEEVSNVKCDASHECPSKHTCCKLASQWGC  
CPLPSAVCCNDHVHCCPEDTTCEAVCCDDKVHCCPEGTTCSVSTGKCHKGDVSIWFEKVPAITAEVEV  
NVKCDATHECPSKHTCCKLASQWGCCPLPSAVCCNDHVHCCPEDTTCEVSSGKCKRKDISFPWFEEKAA  
INVEESPNIKDSTHECKATDTCCCKLKSQWGCCPLPKAVCCDDKVHCCPEGTTCSVSTGKCHKGDVSI  
WFEKVPAITADKEVSNVKCDATHECPSKHTCCKLASQWGCCPLPSAVCCNDHVHCCPEDTTFEDAPNVM  
CDATHECKAKETCCCKLASQWGCCPLPSAVCCNDHVHCCPEGTTCSVSTGKCHKGDISLPWFEEKAAALTV  
DVEKTPCPGGKQECATNYTCCQRGATPYTWGCCDFPNAVCCPDRKTCCPKGYHCDPSRATCFKSESDDIV  
VAKQLAIPDTEQAEVGNVICPGGEYQCEKTTCCVSPSGTFGCCPVPEAVCCVDGVHCCPKDHTCDPSSQ  
TCKSASQLPWQDKLLAKQVQKDIKGSSTSCGDTEETCCMATGQWGCCPMPKAVCCEDHLHCCPRGY  
KCDMPTSTCIRGNDILPMAKKRPADIFNKS\*

### Transcript:

**Note:** No cDNA data available.

### Predicted sequence:

**Note:** The prediction here is from the exons presented and explained in this entry. The parts predicted from the sequence in the current ABEP02018454 (originally from the now "obsolete" wgs sequence NW\_002235344) were based upon manual splice prediction assisted by programs Augustus and FGENESH. The splicing within the repeat is from the JGI estExt\_fgenesh2\_pg.C\_160005 entry and remains to be clarified by additional data.

**Derivation:** As described in this entry.

```
atgaggttactgatagtgtcctgtgcagcctggcctctgcagtgtgtgccattccccaaagggggcgc
accaatgccctgatgtctgccaacctgaagaaacctgctgcaagtccaacagtaactgacacatggctg
ctgtcctatctcaggtacctgttgcaagtgcagcctccactgttgcccagcgggttcaaagtgtgac
ctttcccagaatgctgctgcagggagacctgaccttgaattggtccccaaaaatggaggtcaaattcc
gcgccacgatcacatgtccgggcggaactcatgactgtccggagaataccacttgttgtttgaccgcaa
ggcgactatgggtgctgccctcttgcaaggtgctgctgtaaggatcacaccactgctgccctct
gggttcaaagtgcgacgagtgcggcgggaaagtgtcgccaaggcaacaggacactccccttctggagaagt
ttgcagccagaccaggtttgttgcaaccaagaacaggtgtgccctggcgggaaagtccactgtcccac
caccagcactgctgtatgctgaagaatgggaagtatggctgctgtcccatggaaaaggctgtgtgtgt
gaagacaaggtccactgctgtcccagcggcttccactgtgcagctaccaagtgaagaaggagagtaga
gcattcctctgttcagcaaaaacagaagctaagatcaggcaaatgacccagcgaagacgccaaaagtgt
gacgtccccgacggctgtgtctgctgtaaggacaacaccactgctgcaaggatgacactggagagtac
ggctgctgtccaataccacaggtgagtgtgtaatgatcagatccactgctgtcctgctggcttccact
gccagacagagaagggaagtgttccaagggggcgtggtcgtccctctcctgactaaaaacacgggctga
tgttttgcagaggaggttgagtcggtccattgcatgatggaagtgcctgtccaaacctcacactgc
tgcaagacgcagactgggaaatacggctgctgtccattgccaaaggccgtgtgctgtcaggatgagatcc
actgctgtcctgacggctacactgtgacactgccaagagcaggtgtatcaagggcgacatgaccctccc
ctggctggagaaacgaccttcaaagtctccaggaaggaccctggaaccaagccccctcccgtgcaagt
gtctgtcccgaccacgtgtcaatgtgtccagacaacaacacctgctgtctgctgcaggatgggagctatg
gctgtgccccgagccacatgccgtgtgctgcagcagcctgtaagcactgctgccacaaggctacactg
cgacacctcacagggaaagtgcctgcagggctacagaacctcccgtggatagagaacacggctcgcgccc
cccaacaaggtcgtgactccctacaaggtcgagccccagtcacccccatcgactgtgatgaggaaggca
aggtcaagtcccagataagaacacctgctgcaagaagacgaccggagaatgggggtgctgtcctcttga
gaaggcctgtgctgtgaggacaaggtccactgctgtccccacggtaaccgtgtgtaacaaaacctccggg
gagtgctactatcctgatggcactcccaggcctgggtgcagaagacaccaccctcctggacgtcaggg
atgatgtgaaagatgtgccgtgtcccgatggaaagtccgcttgtgaggaagactacactgctgtaagaa
cagcaccggctatggctgctgtcccttctccagggctgtctgctgtaacgacacggctccactgctgtccc
cagcactacacatgcaactctggggctccaggaacctgtatccacaacttctgccactgtccaatgg
ccaagaagactactccaaagatggtacaactccacaacgaagagattgaaactgacaatgagatactgaa
caatgtaaggtgcgacacattccatgagtcccagctaacaaacgtgctgtaagcttctcctctggacag
tggggctgctgtcccttgccttgcgctgtctgctgtgacgacctgtccactgctgtcctgaagatacaa
catgcagtgtgtccactggaaaatgtcacaaaggtgatgccagcattacttggtttgagaagttgcctgc
taagactgttcagaatgacccaaacatcatgtgtgatgccaccacgaatgcccttcaaaaacacacatgc
tgaagctggcctctggacagtggggctgctgtcccttaccagtgctgtctgctgtaacgacctatgtc
actgctgtcctgaaggaacaacatgtaaaagtctcaacaggaaaagtgtgaaaaggagacatcaccttggc
ttggtttgagaaaaacaagtgccataacagttgaagatgacccaaatgtcatgtgtgatgccaccatgaa
tgcaaaagctaaagaaacgtgctgtaaaactaaagtctggacagtggggctgctgtcctttgccaaaggctg
tctgctgtgatgacaaaagttcactgctgtcctgaaggaacaacctgtagtgtgtccactggaaaatgcaa
caaaggtgatgttagcttagcctggtttgaaaagtgcctgctaagaatgtccaaaatgacccaaacatc
atgtgtgatgccaccacgaatgcccttcaaaaacacacgtgctgtaagctggcctctggacagtggggct
gctgtcccttaccagtgctgtctgctgtaacgacctgtccactgctgtcctgagggaaacaacatgcag
tgtttcaacaggaaaagtgtgaaaaggagaaaatcaccttggcttggtttgagaaaaacaagtgccataaca
gttgaagatgacccaaatgtcatgtgtgatgccaccatgaatgcaaaagctaaagaaacgtgctgtaaac
tggcgtctggacagtggggctgctgtcctcttccaaaggctgtctgctgtgatgacaaaagttcactgctg
tccctgaaggaacaacctgtagtgtgtccactggaaaatgcaacaaaggtgacattagcttccctggttt
gagaaaagttcctgctaacaatgtccaaaatgtccaaaacatgaagtgtgacgccaccacagtgccctt
caaaaacacacgtgctgtaagctggcctctggacagtggggctgctgtcccttaccagtgctgtctgctg
taacgaccacgtccactgctgtcccgaagatactacatgcgaagtttcatctggaaagtgaagagaaaa
gacatcagcttccctggtttgagaaaagttccagccataacaacagcacaagaagtttcaaagtgaat
gcgacgccaccatgaatgcccttcaaaaacacacgtgcttgcctgtctgctgtaacgaccacgtccactgc
tgtcccgaagatactacatgtgaagtgtcttctggaaagtgaaaaggagaaaaacagcttaccatggttt
gagaaaaacaagtgccataacagttgaagatgacccaaatgtcatgtgtgatgccaccatgaatgcaaaag
ctaaaagaaacttgcctgtaagctggcctctggacagtggggctgctgtcctcttccaaaggctgtctgctg
tgacgacctgttccactgctgtccagaaggaaacaacctatactacatgtgaggtgtcatcaggaaagtgc
aagagaaaggattctagcattccctggtttgaaaagttccagctataacaactgaagaagtttcaaagt
```

taaaatgcgatgccaccacgaatgcccttcaaaacacacatgctgtaagctggcctctggacagtgggg  
ctgctgtcccttaccagtgctgtctgctgtaacgaccatgttactgctgtcccgaagatactacatgc  
agtgtgacaggaagtgtgaaaaggagaaatcagccttcccttggtttgagaaaacaagtgccataa  
cagttgaagatgcaccaaagtcatgtgtgatgccaccatgaatgcaaggcaagagaaacttgctgtaa  
gctggagtctggacagtggggctgctgtcctcttccaaaggctgtctgctgtgatgacaaagttcattgc  
tgtcctgaaggaactacctgtagtgtgcaactggaaaatgtcaciaaaggtagcgttagcattacttgg  
tcgagaaagttccagctataacagctgaggaagaagtctccaatgtaaaatgcgatgccaccacgagt  
tcccttcaaaacacacatgctgtaagctggcctctggacagtggggctgctgtcccctaccagtgctgtc  
tgctgtaacgaccagttcactgctgtcctgaagatacaacgtgagaggtttcatctggaaagtgcaaga  
gaaaggatgctagcattccttggtttgacaaagttccagctataacaactgaagaagtttcaaatgtaa  
atgcgatgcctcccacgaatgcccttcaaaacacacatgctgtaagctggcctctggacagtggggctgc  
tgtcccttaccagtgctgtctgctgtaacgaccatgttactgctgtcccgaagatactacatgcgagg  
ctgtctgctgtgatgacaaagttcactgctgtcctgaaggaactacctgtagtgtgcaactggaaaatg  
tcaciaaaggtagtttagcattccttggtttgagaaagtgccagctataacagctgaggaagaagtttcc  
aatgtcaaatgcgatgccaccacgagtgtccttcaaaacacacgtgctgtaagctggcctctggacagt  
ggggctgctgtcccctaccagtgctgtctgctgtaacgaccatgttactgctgtcccgaagatactac  
atgcgagggtgtcttctggaaagtgaagagaaaagacatcagcttcccttggtttgagaagaaagcagcc  
attaatgttgaagaaagcccaaacattaaatgtgactccaccatgagtcaaggccactgacacttgct  
gtaaaactaaagtctggacagtggggctgctgtcctcttccaaaggctgtctgctgtgatgacaaagttca  
ttgctgtcctgaaggaactacctgtagtgtgcaactggtaaatgtcaciaaaggtagtttagcattccc  
tggtttgagaaagttccagctataacagctgacaaagaagtctccaatgtcaaatgcgatgccaccacg  
agtgtccttcaaaacacacgtgctgtaagctggcctctggacagtggggctgctgtcccctaccagtg  
tgtctgctgtaacgaccatgttactgctgtccagaagatactacatttgaagatgcaccaaagtcatg  
tgtgacgccaccacgaatgcaaagctaaagaaacgtgctgcaagctggcctctggacagtggggctgct  
gtccccttaccagtgctgtctgctgtaacgaccagctccactgctgtccagaaggaactactttagt  
gtcaacgggaaaatgcaagcatggtgacatcagcttaccctggttggagaagaaggctgtttaaactg  
gatgttgagaagaccctgtccaggaggtaaacaggaatgtgcaacaaactacacctgctgccagagag  
gagccacaccttacacctgggggtgctgagacttccctaacgctgtatgttgcggatcgtaagacctg  
ctgtcctaaaggataccactgtgatcctagcagagcaacgtgcttcaagagcgaagtagacattgtt  
gtagccaagcaacttgccataccggatactgaacaggctgaggtgggaaatgtgatatgtcctggtggtg  
agtaccagtcccagagaagaccacctgttgtgtgagtcctctggtacatttggatgctgtcctgtccc  
cgaggctgtatgctgtgtggatggggtacactgttggccaaaggaccacacgtgtgatccgtcatcaca  
acttgaagagtgccagtggtcaactgccctggcaggacaagctgttagccaaacaagtagcaggtgaaag  
atattaagtgtggcagtagcacctccacttgcggagatacagagacctgctgtaagatggctactggaca  
gtggggatgctgtcctatgcctaaggctgtctgctgtgaggaccacctacactgctgccctagaggctac  
aagtgcgacatgccgaccagtagctgtatccgtggtaacgacatccttccatggccaagaaaagaccgc  
cagacatcctcaacaaatcttaa

**cDNA data:**

**cDNA sequence data:** No cDNA data (or empty cDNA entry).

**Genomic data:**

**Note:** Genomic data (exons). The exons before and after the granulin repeat sequence were predicted from ABEP02018454.1 (GI:227042074), because these were used in our analysis of relationships between modules in the various species. The 5 exons from the repeat were taken from the estExt\_fgenes2\_pg.C\_160005 model. They come from splicing within a highly repetitive sequence of about 27 granulin-module-coding sequences. There is not a clean read through this repeat because of frame shifts, but there may be sequence errors in this region, so the prediction within the repeat is quite tentative. Whatever the number in the transcript, however, the repeat modules are highly similar.

From NCBI and JGI: ABEP02018454.1 GI:227042074, and estExt\_fgenes2\_pg.C\_160005

**Coding exon 1 Exon type: sn**

**Note:** From start codon

ATGAGGTTACTGATAGTGTCTCCTGTGCAGCCTGGCCCTCTGCAGTGCTGTGCCATTCCCCAAGGGGGCGC  
ACCAATGCCCTGATGTCTGCCAACCTGAAGAAAACCTGCTGCAAGTCCAACAGTACACTGACACATGGCTG  
CTGTCTATTCTCAG

**Coding exon 2 Exon type: cn**

GCTACCTGTTGCAGTGACGGCCTCCACTGTTGCCCCAGCGGGTTCAAATGTGACCTTTCCAGAAATGCCT  
GCCTGCAGGGAGACCTGACCTTGAATTGGTCCCCAAAATGGAGGTCAAATTCGCGCCACGATCACATG

TCCGGGCGGAACTCATGACTGTCCGGAGAATACCACTTGTGTTTGACCGCCAAGGGCGACTATGGGTGC  
TGCCCTCTTGCGAAG

**Coding exon 3 Exon type: cn**

GCTGCCGTGCTGTAAGGATCACACCCACTGCTGCCCCCTCTGGGTTCAAATGCGACGAGTCGGCGGGAAAGT  
GTCGCCAAGGCAACAGGACACTCCCCCTCCTGGAGAAGTTTGACAGCCAGACCCAGGTTTGTGCGAACCA  
AGAACAGGTGTGCCCTGGCGGGAAGTCCACCTGTCCCACCACCAGCACCTGCTGTATGCTGAAGAATGGG  
AAGTATGGCTGCTGTCCCATGGAAAAG

**Coding exon 4 Exon type: c**

GCTGTGTGTTGTGAAGACAAGGTCCACTGCTGTCCCAGCGGCTTCACCTGTGCAGCTACCAAGTGTAAGA  
AGGGAGAGTACAGCATTCCTCTGTTCAGCAAAAACAGAAGCTAAGATCAG

**Coding exon 5 Exon type: n**

GCAAAATGCACCCAGCGAAAAGACGCCAAAAGTAGTGACGTGCCCCGACGGTCTGTCTGCCTGTAAGGACAAC  
ACCACCTGTGCAAGGATGACACTGGAGAGTACGGCTGCTGTCCAATACCACAG

**Coding exon 6 Exon type: cn**

GCTGAGTGTGCTGTAATGATCAGATCCACTGCTGTCTGCTGGCTTCACCTGCCAGACAGAGAAGGGGAAGT  
GTTCCAAGGGGGCGTGGTCTCCCTCCTGACTAAAACACGGGCTGATGTTTTGTGAGAGGAGTTGA  
GTCCGTCCATTGCGATGATGGAAGTGCTGTCCAAACCATCACACCTGTGCAAGACGCAGACTGGGAAA  
TACGGCTGCTGTCCATTGCCAAAAG

**Coding exon 7 Exon type: c**

GCCGTGTGCTGTGAGGATGAGATCCACTGCTGTCTGACGGCTACACCTGTGACACTGCCAAGAGCAGGT  
GTATCAAGGGCGACATGACCCCTCCCTGGCTGGAGAAAACGACCTTCAAAGTCCCTCCAGGAAG

**Coding exon 8 Exon type: n**

GACCTGGAACCAAGCCCCCTCCGGTGCAGTGGTCTGTCCCGACCAGTGTCAATGTGTCCAGACAACA  
ACACCTGCTGTCTGCTGCAGGATGGGAGCTATGGCTGCTGCCCCGAGCCACAT

**Coding exon 9 Exon type: cn**

GCCGTGTGCTGCAGCGACCGTAAGCACTGCTGCCCACAAGGCTACACCTGCGACACCTCACAGGGAAAGT  
GCTGCAGGGTACAGAACCATCCCGTGGATAGAGAACACGGTTCGCGCCCCCAACAAGGTCTGACTCC  
CTACAAGGTCGAGCCCCAGTCAACCCCATCGACTGTGATGAGGAAGGCAAGGTCAAGTGCCAGATAAG  
AACACCTGTGCAAGAAGACGACCCGGAGAATGGGGGTGCTGTCTCTTGAGAAG

**Coding exon 10 Exon type: c'**

**Note:** The notation c' for this unusual exon denotes encoding also the first Cys of the next granulin module

GCCCTGTGCTGTGAGGACAAGGTCCACTGCTGTCCCCACGGTACCGTGTGTAACAAAACCTCCGGGGAGT  
GTCATATCCTGATGGCACCTCCAGGCTGGGTGCAGAAAGACACCACCCCTCCTGGACGTGAGGGATGA  
TGTGAAAAGATGTGCCGTGTCCCGATGGAAAAG

**Coding exon 11 Exon type: Incl**

**Note:** The notation Incl denotes an exon encoding all but the first and last Cys of a granulin module

TCCGCTTGTGAGGAAGACTACACCTGCTGTAAGAACAGCACCGGCTATGGCTGCTGTCCCTTCTCCAGGG  
CTGTCTGCTGTAACGACACGGTCCACTGCTGTCCCAGCACTACACATGCAACTCTGGGGCTCCAG

**Coding exon r1 Exon type: n'cncncncnc+**

**Note:** From estExt\_fgenesh2\_pg.C\_160005. The notation n' indicates the exon encodes also the last Cys of the previous module, and + indicates the beginning of an N-half module truncated after the third Cys codon.

GAACCTGTATCCACAACCTCCCTGCCACTGTCCCAATGGCCAAGAAGACTACTCCAAAGATGGTACAAC  
CCACAACGAAGAGATTGAAACTGACAAATGAGATACTGAACAATGTAAGGTGCGACACATCCATGAGTGC  
CCAGCTAACATACTGCTGTAAAGCTTCTCTGGACAGTGGGGCTGCTGTCCCTTGCCTTCGGTGTCT  
GCTGTGACGACCATGTCCACTGCTGTCTGAAAGATAACAATGCAGTGTGTCCACTGGAAAATGTCACAA  
AGGTGATGCCAGCATTACTTGGTTTGAGAAGTTGCCCTGCTAAGACTGTTGAGAATGACCCAAACATCATG  
TGTGATGCCACCCACGAATGCCCTTCAAACACACATGCTGTAAGCTGGCCTCTGGACAGTGGGGCTGCT  
GTCCCTTACCCAGTGTGTCTGCTGTAACGACCATGTTCACTGCTGTCTGAAAGGAACAACATGTAAAGT  
CTCAACAGGAAAAGTGTGAAAAGGGAGACATCACCTTGGCTTGGTTTGAGAAAACAAGTGCCATAACAGTT  
GAAGATGCACCAATGTATGTGTGATGCCACCATGAATGCAAAGCTAAAGAAACGTGCTGTAAACTAA  
AGTCTGGACAGTGGGGCTGCTGTCTTTCGCAAAGGCTGTCTGCTGTGATGACAAAGTTCACCTGCTGTCC

TGAAGGAACAACCTGTAGTGTGTCCACTGGAAAAATGCAACAAAGGTGATGTTAGCTTAGCCTGGTTTGA  
AAGTCGCCTGCTAAGAAATGTCCAAAATGACCAAAAACATCATGTGTGATGCCACCCACGAATGCCCTTCAA  
AACACACGTGCTGTAAGCTGGCCTCTGGACAGTGGGGCTGCTGTCCCTTACCCAGTGCTGTCTGCTGTAA  
CGACCATGTCCACTGCTGTCTGAGGGAAACAACATGCAGTGTTCACACAGGAAAAGTGTGAAAAAGGGAGAA  
ATCACCTTGGCTTGGTTTGGAGAAAAAAGTGCATAACAGTTGAAGATGCACCAAATGTCATGTGTGATG  
CCACCATGAATGCAAAGCTAAAAGAAACGTGCTGTAAACTGGCGTCTGGACAGTGGGGCTGCTGTCCCTCT  
TCCAAAGGCTGTCTGCTGTGATGACAAAAGTTCACTGCTGTCTGAAGGAACAACCTGTAGTGTGTCCACT  
GGAAAAATGCAACAAAGGTGACATTAGCTTTCCCTGGTTTTGAGAAAAGTTCTGTAAACAATGTCCAAAATG  
TCCAAAACATGAAGTGTGACGCCACCCACGAGTGCCTTCAAAAACACACGTGCTGTAAGCTGGCCTCTGG  
ACAGTGGGGCTGCTGTCCCTTACCCAGTGCTGTCTGCTGTAAACGACCACGTCCACTGCTGTCCGGAAGAT  
ACTACATGCGAAGTTTCATCTGGAAAAGTGCAAGAGAAAAGACATCAGCTTTCCCTGGTTTTGAGAAAAGTTC  
CAGCCATAACAACAGCACAAAGAAAGTTTCAAATGTGAAATGCGACGCCACCCATGAATGCCCTTCAAAAACA  
CACGTGCT

**Coding exon r2 Exon type: jnc"**

**Note:** From estExt\_fgenes2\_pg.C\_160005. Here j is a module joining sequence produced by a mostly out of frame C-half sequence, and c" denotes encoding of a C-half truncated before the last two single Cys.

TGCTGTCTGCTGTAACGACCACGTCCTACTGCTGTCCCGAAGATACTACATGTGAAGTGTCTTCTGGAAAAG  
TGAAAAGGGAGAAAACAGTCTACCATGGTTTTGAGAAAACAAGTGCATAACAGTTGAAGATGCACCAAAT  
GTCATGTGTGATGCCACCCATGAATGCAAAGCTAAAGAAACTTGCTGTAAGCTGGCCTCTGGACAGTGGG  
GCTGTCTGCTCTTCCAAAGGCTGTCTGCTGTGACGACCATGTTCACTGCTGTCCAGAAGGAACAACCT

**Coding exon r3 Exon type: ncnncnc"**

**Note:** From estExt\_fgenes2\_pg.C\_160005. In this case the C-half truncation (c") is after the penultimate single Cys.

ATACTACATGTGAGGTGTCATCAGGAAAAGTGCAAGAGAAAAGGATTCTAGCATTCCCTGGTTTGA AAAAAGT  
TCCAGCTATAACAACCTGAAGAAGTTTCAAATGTAAAAATGCGATGCCACCCACGAATGCCCTTCAAAAACAC  
ACATGCTGTAAGCTGGCCTCTGGACAGTGGGGCTGCTGTCCCTTACCCAGTGCTGTCTGCTGTAACGACC  
ATGTTCACTGCTGTCCCGAAGATACTACATGCAGTGTGTGACAGGAAAAGTGTGAAAAGGGAGAAAATCAG  
CCTTCCCTGGTTTTGAGAAAACAAGTGCATAACAGTTGAAGATGCACCAAATGTCATGTGTGATGCCACC  
CATGAATGCAAGGCAAGAGAAAACCTGCTGTAAGCTGGAGTCTGGACAGTGGGGCTGCTGTCCCTCTTCCAA  
AGGCTGTCTGCTGTGATGACAAAAGTTCAATTGCTGTCTGAAAGGAACTACCTGTAGTGTGTCAACTGGAAA  
ATGTCACAAAAGGTGACGTTAGCATTACTTGGTTCGAGAAAAGTTCAGCTATAACAGCTGAGGAAGAAAGTC  
TCCAAATGTA AAAATGCGATGCCACCCACGAGTGTCCCTTCAAAAACACACATGCTGTAAGCTGGCCTCTGGAC  
AGTGGGGCTGCTGTCCCTTACCCAGTGCTGTCTGCTGTAAACGACCACGTTCACTGCTGTCTGAAAGATA  
AACGTGCGAGGTTTCATCTGGAAAAGTGCAAGAGAAAAGGATGCTAGCATTCCCTGGTTTGA CAAAAGTTCCA  
GCTATAACAACCTGAAGAAGTTTCAAATGTAAAAATGCGATGCCTCCACGAATGCCCTTCAAAAACACACAT  
GCTGTAAGCTGGCCTCTGGACAGTGGGGCTGCTGTCCCTTACCCAGTGCTGTCTGCTGTAACGACCATGT  
TCACTGCTGTCCCGAAGATACTACATGCGAG

**Coding exon r4 Exon type: cncncnc"**

**Note:** From estExt\_fgenes2\_pg.C\_160005. Here c" denotes encoding of a C-half truncated before the last two single Cys.

GCTGTCTGCTGTGATGACAAAAGTTCACTGCTGTCTGAAAGGAACTACCTGTAGTGTGTCAACTGGAAAAAT  
GTCACAAAAGGTGATGTTAGCATTCCCTGGTTTGA GAAAAGTGCCAGCTATAACAGCTGAGGAAGAAAGTTTC  
CAATGTCAAATGCGATGCCACCCACGAGTGTCCCTTCAAAAACACACGTGCTGTAAGCTGGCCTCTGGACAG  
TGGGGCTGCTGTCCCTTACCCAGTGCTGTCTGCTGTAAACGACCATGTTCACTGCTGTCCCGAAGATACTA  
CATGCGAGGTGCTTCTGGAAAAGTGAAGAGAAAAGACATCAGCTTTCCCTGGTTTGA GAAAGAAAGCAGC  
CATTAATGTTGAAGAAAAGCCAAAACATTAATGTGACTCCACCCATGAGTGCAAGGCCACTGACACTTGC  
TGTA AACTAAAAGTCTGGACAGTGGGGCTGCTGTCCCTTCCAAAGGCTGTCTGCTGTGATGACAAAAGTTT  
ATTGCTGTCTGAAAGGAACTACCTGTAGTGTGTCAACTGGTAAATGTCACAAAAGGTGATGTTAGCATTCC  
CTGGTTTTGAGAAAAGTTCCAGCTATAACAGCTGACAAAAGTCTCCAATGTCAAATGCGATGCCACCCAC  
GAGTGTCCCTTCAAAAACACACGTGCTGTAAGCTGGCCTCTGGACAGTGGGGCTGCTGTCCCTTACCCAGT  
CTGTCTGCTGTAACGACCATGTTCACTGCTGTCCAGAAGATACTACAT

**Coding exon r5 Exon type: nc**

**Note:** From estExt\_fgenes2\_pg.C\_160005.

TTGAAGATGCACCAAATGTCATGTGTGACGCCACCCACGAATGCAAAGCTAAAAGAAACGTGCTGCAAGCT  
GGCCTCTGGACAGTGGGGCTGCTGTCCCTTACCCAGTGCTGTCTGCTGTAACGACCACGTCCACTGCTGT  
CCAGAAGGAACTACTTGTAGTGTGTCAACGGGAAAATGCAAGCATGGTGACATCAGCTTACCCTGGTTTTG  
AGAAGAAGGCTGCTTTAACA

**Coding exon u Exon type: n**

GTGGATGTTGAGAAGACCCCTGTCCAGGAGGTAAACAGGAATGTGCAACAACTACACCTGCTGCCAGA  
GAGGAGCCACACCTTACACCTGGGGGTGCTGCGACTTCCCTAAC

**Coding exon v Exon type: c**

GCTGTAATGTTGCCGATCGTAAGACCTGCTGTCTTAAAGGATACCACTGTGATCCTAGCAGAGCAACGT  
GCTTCAAGAGCGAAAGTGATGACATTGTTGTAGCCAAGCAACTTGCCATACCGGATACTGAACAGGCTGA  
G

**Coding exon w Exon type: n**

GTGGGAAATGTGATATGTCCTGGTGGTGAGTACCAGTGCCAGAGAAAGACCACCTGTTGTGTGAGTCCCT  
CTGGTACATTTGGATGCTGTCTGTCCCGAG

**Coding exon x Exon type: c**

GCTGTATGCTGTGTGGATGGGGTACACTGTTGCCCAAAGGACCACACGTGTGATCCGTCATCACAACTT  
GTAAGAGTGCCAGTGGTCAACTGCCCTGGCAGGACAAGCTGTTAGCCAAACAAGTACAG

**Coding exon y Exon type: n**

GTGAAAGATATTAAGTGTGGCAGTAGCACCTCCACTTGCGGAGATACAGAGACCTGCTGTAAGATGGCTA  
CTGGACAGTGGGGATGCTGTCTTATGCCTAAG

**Coding exon z Exon type: c**

**Note:** Up to stop codon  
GCTGTCTGCTGTGAGGACCACCTACACTGCTGCCCTAGAGGCTACAAGTGCAGACATGCCGACCAGTACGT  
GTATCCGTGGTAAACGACATCCTTCCCATGGCCAAGAAAAGACCCGCAGACATCTTCAACAAATCTTAA

**Genomic sequence note:** A genomic sequence is not presented (see note 2 in header).

---

00036 **C. intestinalis progranulin (long)** Short name: **C\_intL** Date entered: 2014-03

**Species:** *Ciona intestinalis* (yellow sea squirt)

**Taxonomy (via NCBI):** Eukaryota; Metazoa; Chordata; Tunicata; Ascidiacea; Enterogona; Phlebobranchia; Cionidae; Ciona.

**General Comment:** We include the L (long) suffix in case a short form is found, as we have found a short form in *C. savignyi*. The *C. intestinalis* data are currently better for the long form progranulin. Genomic data allow prediction of a 7 module progranulin (as in the protein sequence presented). The EST cDNA data allow assembly of 2 contigs representing the same gene. One encodes a complete 4 module progranulin having the first 2 and last 2 predicted modules. The other is incomplete, beginning in the middle repetitive sequence and encoding the last 4 modules of a longer product. We are assuming there are 7 modules in the maximum progranulin from this gene, because the gap in AABS01000126.1 is given as only 50 bases, but perhaps the number of nearly identical modules encoded in the middle of this gene is not definitely settled by the data at this time.

**Protein Sequence**

MNLYFILTLCIVLSSSFSTSSNGQVSNFGLKRILRPEYDTATVLCPDGRSECFSGSTCCKLSTGQYGCCPHF  
NAVCKDDKHCCPHNYKCNVQNSTCDMALDVQVQPIMLTDSVILNVGMVQCPDGRSACPDGNTCCKLASG  
AYGCCPQPKAVCCSDHVHCCPQGYSCNVGSGTCLKQDSL SVVPWMEKQEAVAYNVGMVQCPDGRSACPDG  
NTCKLASGAYGCCPQPKAVCCSDHVHCCPQGYSCNVGSGTCLKQDSL SVVPWMEKQEAVTLNVGMVQCP  
DGHSACPDGNTCCXXXXXXXXXXXXXXXXAVCCSDHVHCCPQGYSCNVGSGTCLKQDSL SVVPWMEKQDSVA  
FNVGMVQCPDGRSACPDGNTCCKLASGAYGCCPQPKAVCCSDHVHCCPQGYSCNVGSGTCLKQDSL SVVP  
WMEKQEAVAYNVGMVQCPDGRSACPDGNTCCKLASGAYGCCPQPKAVCCSDHVHCCPQGYSCNVGSGTCL  
KQDSL SVVPWMEKQMSLRMTLNQNKKLKLTKEKCTMCPDGSECPDYTCCTLTSGRYGCKFNSAVCCA  
DHLHCCPYNTVCDTQRKVCLSRFGEIGFEPMASTWSENEVTDNTDDESP I I L \*

**Transcript:**

**Note:** So far the EST cDNA data indicate at least 2 alternatively spliced transcripts.

**Predicted sequence:**

**Note:** This hypothetical sequence comes from the maximum exon use.

**Derivation:** Based upon the analysis of genomic data (see below).

ATGAATTTGTACTTCATCTTAACTTGTATAGTTCTGTCTAGCTTCAGCACTTCATCAAATGGCCAAGTTT  
CAAACCTCGGTTTAAAAAGAAATTTAAGACCAGAGTATGACACAGCCACAGTTCTTTGTCCAGATGGAAG

GTCCGAGTGTTCCTGGAAGCACTTGTCTGCAAGTTGTCAACTGGTCAGTATGGTTGCTGTCCTCATCCA  
AATGCTGTTTGTGCAAGGATGATAAGCATTGTCTGCCACATAATTACAAATGCAATGTTCAAAATTTCCA  
CATGTGACATGGCCTTGGATGTACAAGTACAGCCAATCATGTTAACAGACTCCGTTATATTTAAATGTTGG  
TATGGTTCAATGTCTGATGGTCTGTTCTGCTTGTCCAGATGGTAACTTGTGTAAGCTAGCATCTGGT  
GCATATGGTTGTTGCCACAACCTAAAGCAGTATGCTGCTCAGATCATGTACATTGTTGTCCACAAGGTT  
ATTCTTGTAAATGTTGGCAGTGGAACTTGCCTTAAACAAGATTCTTTATCAGTTGTACCATGGATGGAGAA  
GCAAGAAGCGGTTGCATATAATGTTGGTATGGTTCAATGTCTGATGGTCTGTTCTGCTTGTCCAGATGGT  
AACACTTGTGTAAGCTAGCATCTGGTGCATATGGTTGTTGCCACAACCTAAAGCAGTTTGTGCTCAG  
ATCATGTACATTGTTGTCCACAAGGTTATTCTTGTAAATGTTGGCAGTGGAACTTGCCTTAAACAAGATTC  
TTTATCAGTTGTACCATGGATGGAGAAGCAAGAAGCGGTTACATTAAATGTTGGTATGGTTCAATGTCCC  
GATGGTCATTCTGCTTGTCCAGATGGTAACTTGTGTAANNNNNNNNNNNNNNNNNNNNNNNNNNNNNN  
NNNNNNNNNNNGCAGTTTGTGCTCAGATCATGTACATTGTTGTCCACAAGGTTATTCTTGTAAATGTTGG  
CAGTGGAACTTGCCTTAAACAAGATTCTTTATCAGTAGTACCATGGATGGAGAAGCAAGATTCTGTTGCA  
TTTAAATGTTGGTATGGTTCAATGTCCCGATGGTCTGTTCTGCTTGTCCAGATGGTAACTTGTGTAAGC  
TAGCATCTGGTGCATATGGTTGTTGCCACAACCTAAAGCAGTATGCTGCTCAGATCATGTACATTGTTG  
TCCACAAGGTTATTCTTGTAAATGTTGGCAGTGGAACTTGCCTTAAACAAGATTCTTTATCAGTAGTACCA  
TGGATGGAGAAGCAAGAAGCGGTTGCATATAATGTTGGTATGGTTCAATGTCTGATGGTCTGTTCTGCTT  
GTCCAGATGGTAACTTGTGTAAGCTAGCATCTGGTGCATATGGTTGTTGCCACAACCTAAAGCAGT  
TTGTTGCTCAGATCATGTACATTGTTGTCCACAAGGTTATTCTTGTAAATGTTGGCAGTGGCACTTGCCCT  
AAACAAGATTCTTTATCAGTTGTACCATGGATGGAGAAGCAAAATGTCATCCCTGAGAATGACTTTGAACC  
AAAATAAAAAGCTTAAACTTACCAAAGAAAAATGCACAAATGTGCCCCGATGGTTCCGGAATGTCGGGATTA  
TTACTTGTGACATTAACCTCTGGAAGATATGGCTGTTGCAAGTTTAACTCGGCTGTATGTTGTGCT  
GATCATTTGCACTGCTGCCCTACAACACTGTGTGTGACACACAAAGAAAAGTTTGCCTTTTCGAGATTTG  
GTGAGATTGGTTTTGAACCAATGGTTGCTTCAACTGGAGTGAGAATGAAGTAACAGACAACACAGATGA  
TGAATCTCCAATTATACTTTAA

**cDNA data:**

**From:** NCBI est: Contig of GI:(184067240, 192945343, 47769051, 184134408, 184145879, 192907757, 183991537, 47779693, 183989778, 184101113, 184080464, 184078806, 23952661, 23950672, 47741963, 184015413, 192978372, 183262339, 183323666, 47735750, 184126120, 47784603, 24149927, 23923469, 184110755, 24162279)

**Note:** This cDNA contig represents a complete short spliced transcript encoding just 4 granulin modules.

ATAAGGTATTGCCGTTAAACTAAGTATATAGGCTACATCATTTGTTGTTTAAACAGAAAGTAAATATGAA  
TTTGACTTTCATCTTAACTTGTATAGTTCTGCTAGCTTCAGCACTTTCATCAAATGGCCAAGTTTCAAAC  
TTCGGTTTTAAAAAGAAATTTAAGACCAGAGTATGACACAGCCACAGTTCTTTGTCCAGATGGAAAGTCCG  
AGTGTTCCTGGAAGCACTTGTCTGCAAGTTGTCAACTGGTTCAGTATGGTTGCTGTCCTCATCCAAATGC  
TGTTTGTGCAAGGATGATAAGCATTGCTGTCCACATAATTACAAATGCAATGTTCAAAATTTCCACATGT  
GACATGGCCTTGGATGTACAAGTACAGCCAATCATGTTAACAGACTCCGTTATATTTAAATGTTGGTATGG  
TTCAAATGCTGATGGTCACTTCTGCTTGTCCAGATGGTAACTTGTGTAAGCTAGCATCTGGTGCATA  
TGGTTGTTGCCACAACCTAAAGCAGTATGCTGCTCGGATCATGTACATTGTTGTCCACAAGGTTATTCT  
TGTAATGTTGGCAGTGGAACTTGCCTTAAACAAGATTCTTTATCAGTTGTACCATGGATGGAGAAGCAAG  
AAGCTGTTGCATATAATGTTGGTATGGTTCAATGTCCCGATGGTCTGTTCTGCTTGTCCAGATGGTAAAC  
TTGTTGTAAGCTAGCATCTGGTGCATATGGTTGTTGCCACAACCTAAAGCAGTTTGTGCTCAGATCAT  
GTACATTGTTGTCCACAAGGTTATTCTTGTAAATGTTGGCAGTGGCACTTGCCTTAAACAAGATTCTTTAT  
CAGTTGTACCATGGATGGAGAAGCAAAATGTCATCCCTGAGAATGACTTTGAACCAAAAATAAAAAGCTTAA  
ACTTACCAAAGAAAAATGCACAAATGTGCCCCGATGGTTCCGGAATGTCGGGATTATTACTTGTGACACA  
TTAACCCTCTGGAAGATATGGCTGTTGCAAGTTTAACTCGGCTGTATGTTGTGCTGATCATTTGCACTGCT  
GCCCTACAACACTGTGTGTGACACACAAAGAAAAGTTTGCCTTTTCGAGATTTGGTGAGATTGGTTTTGA  
ACCAATGGTTGCTTCAACTTGGAGTGAGAATGAAGTAACAGACAACACAGATGATGAATCTCCAATTATA  
CTTTAACTCACCGAAGCTAATTGAATATTCCTTAATAATCAAATAAATGTGTATCTATTATCTAATGAA  
TGATATCTATCATCTATGCATATAGAACAGTTCTATTTGTTAATTTTGGATTGTGATTTTTCTCTGAA  
TGCGAATAAATTGATTGTATGCAA

**From:** NCBI est: Contig of GI:(24156788, 184067241, 184123034, 183991538, 193031297, 184078807, 183347246, 192978373, 184086795, 192907758, 183262338, 183989779, 184126121, 23935852, 24165809, 24568171, 47955823, 47841386, 24570348, 47960792, 47800072, 47793741, 47958869, 23942826, 24175060, 183275187, 192945344, 23921482, 184123033, 183347247, 183275188, 183249457, 47765322)

**Note:** This cDNA contig represents an incomplete transcript missing sequence from the 5' end, but complete to polyA at 3' end.

AAGGTTATTCTTGTAAATGTTGGCAGTGGCACTTGCCTTAAACAAGATTCTTTATCAGTTGTACCATGGAT



GGAGAAGCAAGAAGCGGTTACATTAATGTTGGTATGGTTCAATGTCCTGATGGTCGTTCTGCTTGCCA  
GATGGTAACACTTGTGTAAAGCTAGCATCTGGTGCATATGGTTGTTGCCACAACCTAAAGCAGTATGCT  
GCTCGGATCATGTACATTGTTGTCCACAAGGTTATTCTTGTAAATGTTGGCAGTGGAACTTGCCTTAAACA  
AGATTCTTTATCAGTTGTACCATGGATGGAGAAGCAAGAAGCGGTTACATTAATGTTGGTATGGTTCAA  
TGTCCTGATGGTCGTTCTGCTTGCCAGATGGTAACTTGTGTAAAGCTAGCATCTGGTGCATATGGTT  
GTTGCCACAACCTAAAGCAGTTTGTGCTCAGATCATGTACATTGTTGTCCACAAGGTTATTCTTGTAA  
TGTTGGCAGTGGCACTTGCCTTAAACAAGATTCTTTATCAGTTGTACCATGGATGGAGAAGCAAGATGCT  
GTTGCATTTAATGTTGGTATGGTTCAATGTCCTGATGGTCGTTCTGCTTGCCAGATGGTAACTTGT  
GTAAGCTAGCATCTGGTGCATATGGTTGTTGCCACAACCTAAAGCAGTTTGTGCTCAGATCATGTACA  
TTGTTGTCCACAAGGTTATTCTTGTAAATGTTGGCAGTGGCACTTGCCTTAAACAAGATTCTTTATCAGTT  
GTACCATGGATGGAGAAGCAAATGTCATCCCTGAGAATGACTTTGAACCAAAAATAAAAAGCTTAAACTTA  
CCAAAGAAAAATGCACAATGTGCCCGATGGTTCGGAATGTCCGATTATTACACTTGTGACATTAAC  
CTCTGGAAGATATGGCTGTTGCAAGTTTAACTCGGCTGTATGTTGTGCTGATCATTTGCACTGCTGCCCC  
TACAACACTGTGTGTGACACACAAAAGAAAGTTTGCCTTTCGAGATTTGGTGAGATTGGTTTTGAACCAA  
TGGTTGCTTCAACTTGGAGTGAGAATGAAGTAACATAACACAGATGATGAATCTCCAATTATACTTTA  
ACTCACCGAAGCTAATTGAATATTCCCTTAATAATCAAATAAATGTGTATCTATTATCTAATGAATGTAT  
ATCTATCATCTATGCATATAGAACAGTTCTATTGTTAATTTGGATTGTGTATTTTTCTCTGAATGCGA  
ATAAATTGATTGTATGCAAAAAAAAAA

### Genomic data:

**Note:** Genomic data (exons). This gene contains only n and c exons. EAAA01000240.1 GI:330857085 contains 7 exons including the first coding exon with signal peptide. The reverse complement of AABS01000126.1 GI:26554616 contains the same, a short gap (given as about 50 bases), which coincides with the end of EAAA01000240.1, and the last 7 exons.

From NCBI wgs: AABS01000126.1 GI:26554616 (122052-130654) in reverse

**Note:** The relevant sequence has a short (50 base) gap in it and ends within the 3'ut of the last coding exon at a much larger gap. EST cDNA data shows that this last exon has errors which do not affect the C-half granulin module encoded in it, but shift frame to predict a different stop.

#### Coding exon 1 Exon type: s

**Note:** From the start codon. (The exon has 60 bases of upstream 5'ut).

ATGAATTTGACTTCATCTTAACTTGTATAGTTCGTCTAGCTTCAGCACTTCATCAAATGGCCAAGTTT  
CAAACCTCGGTTTAAAAAGAAATTTAAGACCAGAGTATGACACAGCCACAG

#### Coding exon 2 Exon type: n

TTCTTTGTCCAGATGGAAAGGTCCGAGTGTTTTTCTGGAAAGCACTTGTGCAAGTTGTCAACTGGTCAGTA  
TGGTTGCTGTCTCATCCAAAT

#### Coding exon 3 Exon type: c

GCTGTTTGTGCAAGGATGATAAGCATTGCTGTCCACATAATTACAAATGCAATGTTCAAAATTCACAT  
GTGACATGGCCTTGGATGTACAAGTACAGCCAATCATGTTAACAG

#### Coding exon 4 Exon type: n

ACTCCGTTATATTAATGTTGGTATGGTTCAATGTCCTGATGGTCGTTCTGCTTGCCAGATGGTAAACAC  
TTGTTGTAAGCTAGCATCTGGTGCATATGGTTGTTGCCACAACCTAAA

#### Coding exon 5 Exon type: c

GCAGTATGCTGCTCAGATCATGTACATTGTTGTCCACAAGGTTATTCTTGTAAATGTTGGCAGTGGAACTT  
GCCTTAAACAAGATTCTTTATCAGTTGTACCATGGATGGAGAAGCAAG

#### Coding exon 6 Exon type: n

AAGCGTTGCATATAATGTTGGTATGGTTCAATGTCCTGATGGTCGTTCTGCTTGCCAGATGGTAAACAC  
TTGTTGTAAGCTAGCATCTGGTGCATATGGTTGTTGCCACAACCTAAA

#### Coding exon 7 Exon type: c

GCAGTTTGTGCTCAGATCATGTACATTGTTGTCCACAAGGTTATTCTTGTAAATGTTGGCAGTGGAACTT  
GCCTTAAACAAGATTCTTTATCAGTTGTACCATGGATGGAGAAGCAAG

#### Coding exon 8 Exon type: n

**Note:** The gap in sequence here would have prevented automatic inclusion of this exon. It is one of the repetitive exons, and is expected to be much like exons 6 and 10.

AAGCGGTTACATTAAATGTTGGTATGGTTCAATGTCCCGATGGTCATTCTGCTTGCCAGATGGTAACAC  
TTGTTGTAANNNNNNNNNNNNNNNNNNNNNNNNNNNNNNNNNNNNNNNNNNNNNNNNNNNNNNNN

**Coding exon 9 Exon type: c**

GCAGTTTGTGCTCAGATCATGTACATTGTTGTCCACAAGGTTATTCTTGTAAATGTTGGCAGTGGAACTT  
GCCTTAAACAAGATTCTTTATCAGTAGTACCATGGATGGAGAAGCAAG

**Coding exon 10 Exon type: n**

ATTCTGTTGCATTTAAATGTTGGTATGGTTCAATGTCCCGATGGTCGTTCTGCTTGCCAGATGGTAACAC  
TTGTTGTAAGCTAGCATCTGGTGCATATGGTTGTTGCCCAACCTAAA

**Coding exon 11 Exon type: c**

GCAGTATGCTGCTCAGATCATGTACATTGTTGTCCACAAGGTTATTCTTGTAAATGTTGGCAGTGGAACTT  
GCCTTAAACAAGATTCTTTATCAGTAGTACCATGGATGGAGAAGCAAG

**Coding exon 12 Exon type: n**

AAGCGGTTGCATAATAATGTTGGTATGGTTCAATGTCCCGATGGTCGTTCTGCTTGCCAGATGGTAACAC  
TTGTTGTAAGCTAGCATCTGGTGCATATGGTTGTTGCCCAACCTAAA

**Coding exon 13 Exon type: c**

GCAGTTTGTGCTCAGATCATGTACATTGTTGTCCACAAGGTTATTCTTGTAAATGTTGGCAGTGGCACTT  
GCCTTAAACAAGATTCTTTATCAGTTGTACCATGGATGGAGAAGCAAATGTCATCCCTGAGAAATGACTTT  
GAACCAAAAATAAAAAGCTTAA

**Coding exon 14 Exon type: n**

ACTTACCAAAGAAAAATGCACAAATGTGCCCGATGGTTCGGAATGTCCGGATTATTACACTTGTTCACA  
TTAACCTCTGGAAGATATGGCTGTTGCAAGTTTAACTCG

**Coding exon 15 Exon type: c**

**Note:** Up to the stop codon. A base (a) was added to correct the end of this exon's coding sequence based upon about 28 EST sequences confirming the read.

GCTGTATGTTGTGCTGATCATTGCACTGCTGCCCTACAACACTGTGTGTGACACACAAAGAAAAGTTT  
GCCTTTCGAGATTGGTGAGATTGTTTTGAACCAATGGTTGCTTCAACTTGGAGTGAGAATGAAGTAAC  
AGACAACACAGATGATGAaTCTCCAATTATACTTTAA

**Genomic sequence note:** A genomic sequence is not presented (see note 2 in header).

---

00032 **C. milii progranulin 1** Short name: **C\_mil1 or Cm1** Date entered: 2014-03

**Species:** *Callorhinchus milii* (elephantfish)

**Taxonomy (via NCBI):** Eukaryota; Metazoa; Chordata; Craniata; Vertebrata; Chondrichthyes; Holocephali; Chimaeriformes; Callorhinchidae; Callorhinchus.

**General Comment:** This has the character of a large form of fish progranulin (A/B). Genomic prediction almost completely confirmed by cDNA data. There is evidence of alternative splicing or allelic variation in EST data.

**Protein Sequence**

MFQAVVILWLATGWAAAHPCPDGSECLDEETCCKSGVETYACCPMPDAVCCSDELHCCPANTTCDLVHSA  
CIQGFNLVSWVKKMPANYPATTKAVCCGDEQHCCPEGFRCETGGNSCIKISENEKAVICPDGASECPDGS  
TCLLPNDQWGCCPLEKAVCCNDRHLHCCPFQTKCDLKMSKCLFPYGLVDMWEKVPARRRFSLTNVGDQDV  
RCSSTASCSAGHTCCQLPSGRFGCCPSPEAVCCADHRHCCPTGSTCDTQAETCQMKGSSIPWLTKVQATV  
RGNVELDVQCDGTVSPTGATCCRASSGGWSCPLPQAVCCEDHIHCCPTGHTCNLTKGTCDPVGFPIPW  
FTKNPATVKDNEALRVMCDETASCPSTGTTCCRKPSGYWGCCPMPEAVCCEDHIHCCPNGYTCETRTECQ  
QQIPPVWVSKFPATVRRIEDEMADVQCDGTVSPTGATCCRASSGGWSCPLPQAVCCEDHLHCCPTGH  
TCNLKKGTCDPVGFPIPWFTKNPATLKDNLKALNVMCDKTASCPSTGTTCCRKPSGYWGCCPVPEAVCCVDH  
VHCCPRGLTCSMDKCEGNETLPWLTKIPATEKLSAPGIKDEKTIKPPENTCCKQSSAEWSCPLPQAV  
CCEDREHCCPKGYTCNVGAGTCEKQSLSLLEWVQRASLSASDRNLPIVMCDDTHHCSSPATCCRSASGWA  
CCPYEQAVCCGDRFCPPQGYVCDGALRECVKPKPRLNWNLLISKHKKTFGTL\*

**Transcript:**

**Note:** Support for prediction from EST cDNA data confirms all granulin modules. Just 48 codons in a module joining

region remain to be confirmed. Transcript beginning defined by JK876886.1. Last 7 modules well defined by a 20 EST contig.

**Predicted sequence:**

**Note:** Predicted from AAVX02031853.1 GI:564441399 from start codon to stop codon.

**Derivation:** Prediction from NCBI wgs AAVX02031853.1 GI:564441399

```
ATGTTCCAAGCTGTTGTGATCTTGTGGTTGGCCACTGGTTGGGCTGCAGCTCATCCATGTCCTGATGGCT
CCGAGTGTCTGGATGAAGAAAACCTGCTGCAAGTCCGGTGTGAGACATATGCTTGTGCTCCTATGCCAGA
TGCGGTGTGCTGCTCAGATGAATTGCATTGTTGCCCGCTAATAACCACCTGTGATCTGGTCCATTACAGCC
TGCAATCAAGGTTTCAATCTTGTGTCTTGGGTAAAAGAAAATGCCAGCAAATATCCAGCAAATACCAAGG
CTGTTTGTGTTGGTGATGAGCAGCACTGCTGTCTGAAAGGCTTCAGGTGTGAAACTGGGGGGAATTCCTG
CATTAAAAATCAGTGAAAAATGAAAAAGCAGTGATTTGCCAGACGGGGCATCTGAATGCCCGGACGGCTCA
ACGTGCTGTTTGTGGCAAATGATCAATGGGGTGTGTTGTCCATTGGAAAAGGCCGTGTGTTGTAATGACC
GACTGCACTGTTGTCTTTTCAAACAAAATGCGATTTGAAAATGTCCAAGTGTGTTGTTTCCGTACGGTCT
GGTGGACATGTGGGAAAAAGTTCCAGCTCGCAGGAGATTTTTCTTTAACAAAATGTTGGAGATCAGGATGTG
CGGTGCACTCCACAGCGAGTTGCTCTGCTGGCCACACCTGCTGCCAGCTCCCTCGGGCCGGTTCGGGT
GCTGTCCCTCACCAAGCAGTTTGTGTGCTGACCACAGACATTGCTGTCCACTGGCTCCACATGTGA
CACTCAGGCAGAAAACCTGTGAGATGAAAGGTTCTTCCATCCCATGGCTCACCAAGGTCCAGGCCACTGTG
AGAGGCAATGTGGAGTTAGATGTCCAGTGTGATGGCACTGTGTCTGTCCACGGGTGCCACCTGCTGCA
GGGCCAGTTCTGGAGTTGGAGCTGTGGCCCTGTGCTCAGGCAGTTTGTGTGAGGATCATATACACTG
TTGTCTACTGGCCATACGTGTAACCTTACGAAAAGGAACCTGTGATGTGCCGGTTTTTCCCATCCCTGG
TTCACCAAGAAATCCAGCGACTGTGAAAAGCAACGAGGCGTTAAGAGTCAATGTGTGATGAAAACCGTAGTT
GTCTTTCAGGGACCACCTGCTGCAGAAAACCTCGGGATATTGGGGCTGCTGCCCTATGCCGTAGGGCGGT
TTGCTGTGAGGACCACATTCAGTGTCTTAATGGCTACACGTGTGAAACTCGGACAGAAAACCTGTGAG
CAGAAAATCCCTCCTATCCCTGGGTGTCAAAGTTCCAGCAACCGTGCAGAGGATTGAAGACGAGATGG
CTGATGTGCAGTGTGATGGCACTGTGTCTGTCCACGGGTGCCACCTGCTGCAGGGCCAGTTCTGGAGG
TTGGAGCTGTGGCCCTGTGCTCAGGCAGTTTGTGTGAGGATCATTACACTGTTGTCTACTGGCCAT
ACCTGTAATCTTAAGAAAAGGAACCTGTGATGTGCCGGTTTTTCCCATCCCTGGTTCACCAAGAAATCCAG
CGACTCTGAAAAGCAACAAAGGCATTAAATGTCAATGTGTGATAAAAACCGTAGTTGTCTTTCAGGGACCAC
CTGCTGCAGAAAAGCCCTCGGGGTATTGGGGCTGCTGCCCTGTGCTGAGGCAGTCTGTTGTGTGGACCAT
GTGCACTGCTGTCTCGAGGGTTAAGTGTGAGTATAAGAGTGTGAAGGTAATGGAGAAACACTTCCTT
GGCTTACTAAGATAACCAGCCACAGAGAAAACCTTCTGCTCCAGGTATCAAATGTGATGAGAAGACAATAAG
TCCACCAGAGAAATACCTGTGCAACAGAGCTCAGCAGAGTGGAGCTGCTGTCTTTGCTCAAGCTGTG
GTTGTGAGGATCGTGAGCATTGTTGTCCGAAGGGTTACACTTGTAAATGTTGGTGTGGTACCTGTGAGA
AGCAAAGCCTCTCTACTCTGGGAAGTCCAGAGAGCTCTCTCTCTGCCAGTGACCGCAATCTCCCTAT
AGTGATGTGTGATGACACCCACCATTGCTCTTCTCTGCCACTTGTGTGCGGTCTGCGTCAGGCTGGGCT
TGCTGCCCTACGAACAAGCTGTGTGCTGTGGGACAGGTTCTGCTGCCACAGGGTTATGCTGTGATG
GGGCACTGAGAGAAATGTGTGAAGAAAACCTCGCCTGAATTGGAATTTGTTAATTTCAAACATAAAAAGAC
CTTTGGTACTCTGTGA
```

**cDNA data:**

**From:** NCBI est: JK876886.1 GI:408952554

**Note:** This is the only cDNA sequence data at present which confirms the first exons and encoding of the C-half module unpaired with an N-half.

```
ATTTAGGAGCTGTGCCTCAGAGACAGCAGTGTGAATTTGTTTCAGAGAGTTGCTGAACTGCATCCTTCTG
CAATTGAGATTACTCCATTCGGAGAAAGCAGGCATGTTCCAAGCTGTTGTGATCTTGTGGTTGGCCACTGG
CTGGGCTGCAGCTCATCCATGTCCTGATGGCTCCGAGTGTGCTTGGATGAAGAAAACCTGCTGCAAGTCCGGT
GTTGAGACATATGCTTGGCTCCTATGCCAGATGCGGTGTGCTGCTCAGATGAATTGCATTGTTGCCCGG
CTAATAACCACCTGTGATCTGGTCCATTACGCTGCATTCAAGGTTTCAATCTTGTGTCTTGGGTAAAAGAA
AATGCCAGCAAATATCCAGCAAATACCAAGGCTGTTTGTGTTGGTGATGAGCAGCACTGCTGTCTGAA
GGCTTCAGGTGTGAAACTGGGGGGAATTCCTGCATTAAAAATCAGTGGTGAAAAATGAAAAAGCAGTGATTT
GCCAGACGGGGCATCTGAATGCCCGGACGGCTCAACGTGCTGTTTGTGTTGCCAAAATGATCAATGGGGTTG
TTGTCCATTGGAAAAGGCCGTGTGTTGTAATGACCGACTGCACTGTTGTCTTTTCAAACAAAATGCGAT
TTGAAAATGTCCAAGTGTGTTTCCGTACGGTCTGGTGGACATGTGGGAAAAAGTTCCAGCTC
```

**From:** NCBI est: Contig of GI:(408959291, 408971809, 408984391, 408909623, 408993559, 408945979, 408972633, 408960618, 409007115, 408911307, 408954242, 408984430, 408929023, 408979615, 409017901, 408947103, 408945943, 408912119, 408980485, 408983476)

**Note:** This cDNA contig confirms exons encoding the last 7 granulin modules.

CAGGATGTGCGGTGCAGCTCCACAGCGAGTTGCTCTGCTGGCCACACCTGCTGCCAGCTCCCCTCGGGCC  
GGTTCGGGTGCTGTCCCTCACCAGAAGCAGTTTGTGTGCTGACCACAGACATTGCTGTCCACTGGCTC  
CACATGTGACACTCAGGCAGAAAACCTGTCAGATGAAAGGTTCTTCCATCCCATGGCTCACCAAGGTCCAG  
GCCACTGTGAGAGGCAATGTGGAGTTAGATGTCCAGTGTGATGGCACTGTGTCTGTCCCACGGGTGCCA  
CCTGTGCAGGGCCAGTTCTGGAGTTGGAGCTGTTGCCCTCTGCCTCAGGCAGTTTGTGTGAGGATCA  
TATACTGTGTCTACTGGCCATACGTGTAACCTTACGAAAAGGAACCTGTGATGTGCCCGTTTTTCCC  
ATCCCCTGGTTACCAAGAATCCAGCGACTGTGAAAAGACAACGAGGCGTTAAGAGTCATGTGTGATGAAA  
CCGCTAGTTGTCTTACAGGGACCACCTGCTGCAGAAAACCTCGGGATATTGGGGCTGTGCCCTATGCC  
TGAGGCGGTTTGTGTGAGGACCACATTCCTGCTGTCTAATGGCTACACGTGTGAAACTCGGACAGAA  
ACCTGTCAGCAGCAAATCCCTCCTATCCCCTGGGTGTCAAAGTTCAGCAACCGTGCAGAGGATTGAAG  
ACGAGATGGCTGATGTGCAGTGTGATGGCACTGTGTCTGTCCCACGGGTGCCACCTGCTGCAGGGCCAG  
TTCTGGAGGTTGGAGCTGTTGCCCTCTGCCTCAGGCAGTTTGTGTGAGGATCATTTACTGTGTCTCT  
ACTGGCCATACCTGTAATCTTAAGAAAAGGAACCTGTGATGTGCCCGTTTTTCCCATCCCCTGGTTACCA  
AGAATCCAGCGACTCTGAAAAGACAACAAGGCATTAATGTCATGTGTGATAAAAACCGCTAGTTGTCTTTC  
AGGGACCACCTGCTGCAGAAAAGCCCTCGGGGTATTGGGGCTGTGCCCTGTGCCTGAGGCAGTCTGTTGT  
GTGGACCATGTGCACTGCTGTCTCGAGGGTTAACGTGCAGTGATATGAAGTGTGAAGGTAATGGAGAAA  
CACTTCTTGGCTTACTAAGATACCAGCCACAGAGAACTTTCTGCTCCAGGTATCAAATGTGATGAGAA  
GACAATATGTCCACCAGAGAATACCTGCTGCAAACAGAGCTCAGCAGAGTGGAGCTGCTGTCTTTGCCT  
CAAGCTGTGTGTTGTGAGGATCGTGAGCATTGTTGTCCGAAGGGTTACACTTGTAAATGTTGGTGTGGTA  
CCTGTGAGAAGCAAAGCCTCTCTACTCTGGGAAAGTCCAGAGAGCGTCTCTCTCTGCCAGTGACCGCAA  
TCTCCCTATAGTGATGTGTGATGACACCCACCATTGCTCTTCTCTGCCACTTGTGTGCGTCTGCGTCA  
GGCTGGGCTTGTGCCCTACGAACAAGCTGTGTGCTGTGGGGACAGGTTCTGCTGCCACAGGGTTATG  
TCTGTGATGGGGCACTGAGAGAATGTGTGAAGAAAACCTGCCTGAATTGGAATTTGTTAATTTCCAAACA  
TAAAAAGACCTTTGGTACTCTGTGATGCTCGGGTACCTTCTCTCCATGTTATGCAGCCAATGAAATGCA  
CTTGTCTTCTGGAGCCTTTTGAACATATAATTGCTTCTTGATTTTTTTTTTTC

**Genomic data:**

**Note:** Genomic sequence is in AAVX02031853.1

From NCBI wgs: AAVX02031853.1 GI:564441399

**Coding exon 1 Exon type: sn**

**Note:** From the start codon. There is 5'ut sequence in this exon.

ATGTTCCAAGCTGTTGTGATCTTGTGGTTGGCCACTGGTTGGGCTGCAGCTCATCCAATGCTCCTGATGGCT  
CCGAGTGTCTGGATGAAGAAACCTGCTGCAAGTCCGGTGTGAGACATATGCTTGTCTCTATGCCAGAA  
T

**Coding exon 2 Exon type: c**

GCGGTGTGCTGCTCAGATGAATTGCATTGTTGCCCGCTAATACCACCTGTGATCTGGTCCATTACAGCCT  
GCATTCAAGGTTTCAATCTTGTGTCTTGGGTAAAAGAAAATGCCAGCAAACCTATCCAGCAAACCTACCAAG

**Coding exon 3 Exon type: c**

GCTGTTTGTGTGGTGTGATGAGCAGCACTGCTGTCTGAAGGCTTCAGGTGTGAAACTGGGGGAATTCCT  
GCATTAATAATCA

**Coding exon 4 Exon type: n**

GTGAAAATGAAAAGCAGTGATTTGCCAGACGGGGCATCTGAATGCCCGGACGGCTCAACGTGCTGTTT  
GTTGCCAAAATGATCAATGGGGTGTGTTGCCATTGGAAAAG

**Coding exon 5 Exon type: c**

GCCGTGTGTTGTAATGACCGACTGCACTGTTGTCTTTTTCAAACAAAATGCGATTTGAAAATGTCCAAGT  
GTTTGTTCCTGACGGTCTGGTGGACATGTGGGAAAAAGTTCAGCTCGCAGGAGATTTTCTTTAAACAAA  
TGTTGGAG

**Coding exon 6 Exon type: n**

ATCAGGATGTGCGGTGCAGCTCCACAGCGAGTTGCTCTGCTGGCCACACCTGCTGCCAGCTCCCCTCGGG  
CCGGTTCCGGGTGCTGTCCCTCACCAGAA

**Coding exon 7 Exon type: cn**

GCAGTTTGTGTGCTGACCACAGACATTGCTGTCCCACTGGCTCCACATGTGACACTCAGGCAGAAAACCT  
GTCAGATGAAAGGTTCTTCCATCCCATGGCTCACCAAGGTCCAGGCCACTGTGAGAGGCAATGTGGAGTT  
AGAATGCCAGTGTGATGGCACTGTGTCTGTCCCACGGGTGCCACCTGCTGCAGGGCCAGTTCTGGAGGT

TGGAGCTGTTGCCCTCTGCCTCAG

**Coding exon 8 Exon type: cn**

GCAGTTTGCTGTGAGGATCATATACACTGTTGTCTACTGGCCATACGTGTAACCTTACGAAAGGAACCT  
GTGATGTGCCCGTTTTCCCATCCCCTGGTTACCAAGAATCCAGCGACTGTGAAAGACAACGAGGCGTT  
AAGAGTCATGTGTGATGAAACCGCTAGTTGTCTTCAGGGACCACCTGCTGCAGAAAACCTCGGGATAT  
TGGGGCTGCTGCCCTATGCCTGAG

**Coding exon 9 Exon type: cn**

GCGGTTTGCTGTGAGGACCACATTCCTACTGCTGTCTAATGGCTACACGTGTGAAACTCGGACAGAAAACCT  
GTCAGCAGCAAATCCCCTCCTATCCCCTGGGTGTCAAAGTTCCCAGCAACCGTGCGAAGGATTGAAGACGA  
GATGGCTGATGTGCAGTGTGATGGCACTGTGTCTGTCCCACGGGTGCCACCTGCTGCAGGGCCAGTTCT  
GGAGGTTGGAGCTGTTGCCCTCTGCCTCAG

**Coding exon 10 Exon type: cn**

GCAGTTTGCTGTGAGGATCATTTACACTGTTGTCTACTGGCCATACCTGTAATCTTAAGAAAGGAACCT  
GTGATGTGCCCGTTTTCCCATCCCCTGGTTACCAAGAATCCAGCGACTCTGAAAGACAACAAGGCATT  
AAATGTCATGTGTGATAAAACCGCTAGTTGTCTTCAGGGACCACCTGCTGCAGAAAACCTCGGGGTAT  
TGGGGCTGCTGCCCTGTGCCTGAG

**Coding exon 11 Exon type: cn**

GCAGTCTGTTGTGTGGACCATGTGCACCTGCTGTCTCGAGGGTTAACGTGCAGTGATATGAAGTGTGAAG  
GTAATGGAGAAACACTTCCCTGGCTTACTAAGATACCAGCCACAGAGAAACTTCTGCTCCAGGTATCAA  
ATGTGATGAGAAGACAATATGTCCACCAGAGAATACCTGCTGCAAACAGAGCTCAGCAGAGTGGAGCTGC  
TGTCCTTTGCCTCAA

**Coding exon 12 Exon type: cn**

GCTGTGTGTTGTGAGGATCGTGAGCATTGTTGTCCGAAGGGTTACACTTGTAATGTTGGTGCTGGTACCT  
GTGAGAAGCAAAGCCTCTCTACTCTGGGAAGTCCAGAGAGCGTCTCTCTGCCAGTGACCCGCAATCT  
CCCTATAGTGATGTGTGATGACACCCACCATTGCTCTTCTCTGCCACTTGCTGTCCGGTCTGCGTCAGGC  
TGGGCTTGCTGCCCTACGAACAA

**Coding exon 13 Exon type: c**

**Note:** up to the stop codon.

GCTGTGTGCTGTGGGGACAGGTTCTGCTGCCACAGGGTTATGTCTGTGATGGGGCACTGAGAGAATGTG  
TGAAGAAACCTCGCTGAATTGGAATTTGTTAATTTCCAAAACATAAAAAAGACCTTTGGTACTCTGTGA

**Genomic sequence note:** A genomic sequence is not presented (see note 2 in header).

---

00033 **C. milii progranulin 2** Short name: **C\_mil2 or Cm2** Date entered: 2014-03

**Species:** *Callorhinchus milii* (elephantfish)

**Taxonomy (via NCBI):** Eukaryota; Metazoa; Chordata; Craniata; Vertebrata; Chondrichthyes; Holocephali; Chimaeriformes; Callorhinchidae; Callorhinchus.

**General Comment:** This gene encodes a progranulin somewhat more related to the fish small forms. But the predicted progranulin has 7 modules, more in line with the long forms (A/B). Three of these modules, however, lack the last two single Cys of the defining Cys motif, and arise from a 3 fold repeat of a variant cn exon.

**Protein Sequence**

MFLLVTLILLREVVSGAVLCPDQSQCEPGETTCCLMQSSQYGCCPVPKGVCCSDHQHCCPQGYNCNNETCV  
KGLLSIPYINKIPVLERLIARNSIESHSTKVFCDAIHYCQGGNTCCRNRTGEWACCGYPQATCCANGLNC  
CPNEFTCEISASICTQNLKIPMETKKPSQKIISLSSSVSSDSSAVKCDSVHSCPDGNTCCRQNTGHWSC  
CPHPQTVCCFAGTMCCPKDYTSVSTSSRAMNGLSIPLVSMISAVESALSTSVSSDSSAVKCDSLYSCPD  
GNTCCRQNTGHWSCCPHPQTVCCFAGTRCCPKDYTSVSTSSRAMNGLSIPLVSMISAVESALSTSVSSD  
SSAVKCDSVYSCPDGNTCCRQNTGHWSCCPHPQTVCCFAGTRCCPKDFSTLFKTSLSLVPVNRMKPVM  
INALSIQFNSGRSVTYCDNLHYCSAENTCCRLPSGWSGCCPIPSATCCNDGVHCCPHGMNCAENSFCTT  
DSIRIPWFNKKPALIATDVVNSVGRDSSVNC DKTYFCKDGLTCCPTAMGRWGCCPFNGQCKDKQTC  
PRHYKCSGGPKMTCKWKIWN\*

**Transcript:**

**Note:** Incomplete transcript cDNA data. Only 2 EST sequences. The C-terminal end confirmed in JK944366.1.

**Predicted sequence:**

**Note:** Predicted and partially supported by sequence cDNA data.

**Derivation:** Combined exons (start to stop) predicted from AAVX02002193.1 and AAVX02002194.1.

```
ATGTTTCTACTGGTAACAAATCTGTTGTTGAGGGAAAGTGGTTTCTGGAGCAGTGCTATGCCAGATCAAA
GTCAATGCCCGGAAGGAACAACATGCTGTCTGATGCAAAGTAGTCAATATGGCTGCTGTCCGGTTCCAAA
GGGTGTTTGTGTTTCAGACCATCAGCATTGTTGCCACAAAGGGTATAACTGTAATAATGAAACGTGTGTG
AAAGGAGGTCTTAGCATTCCCTTACATCAACAAGATCCCTGTCTTGGAGAGATTGATTGCTCGCAACAGCA
TTGAGAGCCACAGCACAAAAGTATTCTGTGATGCCATTCACTACTGTCAAGGAGGAAATACATGCTGCAG
GAATCGAACTGGAGAATGGGCTTGTGCGGTTATCCTCAAGCTACTTGTCTGTGCTAATGGCCTAAACTGC
TGCTCTAATGAATTCACCTGTGAAAATCTCTGCATCAATTTGTACACAAAATGGTCTCAAAAATCCCAATGG
AAACAAAAGAAACCATCACAAAAGATAATAAGTCTGAGCAGCAGTGTGAGCAGTGACAGCTCAGCTGTTAA
GTGTGATAGTGTGCATTCTGTCCAGATGGAAACACTTGTCTGACAAAACACTGGACATTGGAGCTGC
TGCCCCCATCTCAGACTGTCTGTGTTTTGCTGGAAACAATGTGCTGTCCCAAAGATTACACAAGTGGTG
TTTTCCACTTTCATCCAGAGCAATGAATGGCCTGAGCATTCCACTGGTGAGCATGATACTGCAGTGGAGTC
AGCTCTGAGCACCAGTGTGAGCAGTGACAGCTCAGCTGTTAAGTGTGATAGTCTGTATTCTGTCCAGAT
GGAAACACTTGTCTGACAAAACACTGGACATTGGAGCTGTGCCCCCATCTCAGACTGTCTGTGTTGTT
TTGCTGGAAACAAGGTGTGCTCCCAAAGATTACACAAGTGGTGTGTTTTCCACTTTCATCCAGAGCAATGAATGG
CCTGAGCATTCCACTGGTGAGCATGATACTGCAGTGGAGTCAGCTCTGAGCACCAGTGTGAGCAGTGAC
AGCTCAGCTGTTAAGTGTGATAGTGTGATTCTGTCCAGATGGAAACACTTGTCTGACAAAACACTG
GACATTGGAGCTGTGCCCCCATCTCAGACTGTGTGTTTTGGTGGCACACGATGCTGTCCCAAGGA
TTTTTCTACTTTGTTCAAGACATCAAGTAGTCTGAGCGTTCCAGTTAACAGGATGAAACCTGTAATGGAG
ATAAACGCTTTGAGCATTTCAGTTAACAGTGGCAGATCAGTCACATACTGTGATAATCTGCATTACTGTT
CTGCTGAAAATACATGTTGACAGACTGCCTAGTGGATCTTGGGGATGTTGCCCATTCCTTCTGTACATG
TTGTAATGATGGTGTGCACTGCTGTCTCATGGCAATGATTGTGATGACAGAAAATTCCTTCTGTACAACG
GATAGTATCCGTATCCCATGGTTCAACAAAAAACCCTGCACTCATCGCAACAGACGTTGTCAATAGTGTG
GTCGTGATAGTTCGGTGGTCAACTGTGATAAGACATATTTTTGTAAAGATGGACTGACCTGTTGTCCAAC
GGCTATGGGAAGATGGGGATGTTGCCCATTTCTAATGGTCAATGTTGTAAAGATAAACAAACCTGCTGC
CCTCGGCACTACAAAATGTAGTGGGGTCCAAAACAATGACCTGCAATGGAAAATCTGGAAC TAG
```

**cDNA data:**

**From:** NCBI est: JK928855.1 GI:408995594

**Note:** This cDNA encodes the last 2 variant modules and the beginning of the next (penultimate) normal module.

```
AGTGGTGTTCCTTTCATCCAGAGCAATGAATGGCCTGAGCATTCCACTGGTGAGCATGATATCTGCAG
TGGAGTCAGCTCTGAGCACCAGTGTGAGCAGTGACAGCTCAGCTGTTTCAGTGTGATAGTCTGTATTCTTG
TCCAGATGGAAACACTTGTCTGACAAAATCACTGGACATTGGAGCTGTGCCCTCATCCTCAGACTGTC
TGTTGTTTTGCTGGAAACAATGTGCTGTCCAAAAGATTACACAAGTGGTGTTCCTTTCATCCAGAGCAA
TGAATGGCCTGAGCATTCCACTGGTGAGCATGATATCTGCAGTGGAGCCAGCTCTGAGCACCAGTGTGAG
CAGTGACAGCTCAGCTGTTATGTGTGATAGTGTGATTCTGTCCAGATGGAAACACTTGTCTGACAAA
AACACTGGACATTGGAGCTGTGCCCCATCCTCAGACTGTGTGTTTTGGTGGCACACGATGCTGTGTC
CCAAGGATTTTTTCTACTTTGTTCAAGACATCAAGTAGTCTGAGCGTTCTAGTTAACAGGATGAAACCTGC
AATGGAGATAAACGCTTTGAGCATTTCAGTTAACAGTGGCAGATCAGTCACATACTGTGATAATCTGCAT
TACTGTTCTGTGAAAATACATGTTGCAGACTG
```

**From:** NCBI est: JK944366.1 GI:408946050

**Note:** This cDNA encodes DVVNSVGRDS SVVNC DKTYF CKDGLTCCPT AMGRWGCCPF XNGQCKDKQ TCCPRHYKCS GGPKTMTCKW KIWN\* and continues into 3'ut.

```
GACGTNGTCAATAGTGTGGTTCGTGATAGTTCGGTGGTCAACTGTGATAAGACATATTTTTGTAAAGATG
GACTGACCTGTTGTCCAACGGCTATGGGAAGATGGGGATGTTGCCATTCNTAATGGTCAATGTTGTAA
AGATAAACAAACCTGCTGCCCTCGGCACTACAAATGTAGTGGGGTCCAAAACAATGACCTGCAAAATGG
AAAATCTGGAAGTATGATCTCATCGGTTGGAAATACTGAAGAGTTTTGAAAACTTTTGATGGATTTTTTCAAT
AACTTTGCTTTACTTTCACGGTTCATGTTTGCCTTAAATGTTGGAATAAATATCCTTACATTTACATTTTA
CATTTACAGTTTTAACTTACATTTGATTTAATAATAATAGTGTATCCTTGCATTTGATATAGCGCCTTATC
AAGTCTTCGAAACGTCTCAAAGCGCTTACAGAAATATACTGTGAAGTGAATGACTGTATATTTTTGTGGG
CATTTATATCTAGAGGATGTCTCAAAGTGCTTACGGGATATACTTTAAAGTGGAGTAACTGCTGTATTT
GTAGGCTTGGTGCAGATTCAAATAATTGCTTATATCTGACTTTATTTGACTTTTTATAAACCTGGCATT
CAGAAATCAGAAAATTAGTCAATTTAAAAATGTTGCTTTGCTAGAAATGCTTTTGAATAACAAATCAGAT
TTTTTAACCTTTAACAGTGTACAATAATTTCTCTTTTGAATTAAGTGATTGATTACAGTTGAAAACGTC
```

TATCTCTAAATTGCTCTATTAAATCTGTGTTACTGATGATGT

### Genomic data:

**Note:** Genomic sequence is in AAVX02002193.1 GI:564471076 and AAVX02002194.1 GI:564471075, which overlap by about 1600 bases very well,

From NCBI wgs: AAVX02002193.1 GI:564471076

#### Coding exon 1 Exon type: sn

**Note:** from the start codon (which appears to be the beginning of this exon)

ATGTTTCTACTGGTAACAATTCTGTTGTTGAGGGAAGTGGTTTCTGGAGCAGTGCTATGCCAGATCAAA  
GTCAAATGCCCGGAAGGAACAACATGCTGTCTGATGCAAAGTAGTCAATATGGCTGCTGTCCGGTTCCAAA  
G

#### Coding exon 2 Exon type: cn

GGTGTGTTGTTGTTTTCAGACCATCAGCATTGTTGCCACAAGGTATAACTGTAATAATGAAACGTGTGTGA  
AAGGAGGTTCTTAGCATTCCCTTACATCAACAAGATCCCTGTCTTGGAGAGATTGATTGCTCGCAACAGCAT  
TGAGAGCCACAGCACAAAAGTATTCTGTGATGCCATTCACTACTGTCAAGGAGGAAAATACATGCTGCAGG  
AATCGAACTGGAGAATGGGCTTGTGCGGTTATCCTCAA

#### Coding exon 3 Exon type: cn

GCTACTTGCTGTGCTAATGGCCTAAACTGCTGTCTAATGAATTCACCTGTGAAATCTCTGCATCAATTT  
GTACACAAAATGGTCTCAAAATCCCAATGAAAACAAAAGAAACCATCACAAAAGATAATAAGTCTGAGCAG  
CAGTGTGAGCAGTGACAGCTCAGCTGTTAAGTGTGATAGTGTGCATTCTGTCCAGATGGAAACACTTGC  
TGTCGACAAAACACTGGACATTGGAGCTGCTGCCCCATCCTCAG

#### Coding exon 4 Exon type: c'n

**Note:** This is a cn variant in which the encoded C-half module lacks the last 2 single Cys of the normal motif.

ACTGTCTGTTGTTTTGCTGGAACAAATGTGCTGTCCAAAGATTACACAAGTGGTGTTCCTTCCACTTCATCCA  
GAGCAATGAATGGCCTGAGCATTCCACTGGTGAGCATGATATCTGCAGTGGAGTCAGCTCTGAGCACCAG  
TGTGAGCAGTGACAGCTCAGCTGTTAAGTGTGATAGTGTGATTTCTGTCCAGATGGAAACACTTGTCTG  
CGACAAAACACTGGACATTGGAGCTGCTGCCCCATCCTCAG

From NCBI wgs: AAVX02002194.1 GI:564471075

**Note:** Because of the very high level sequence identity with exon 4 and the last part of AAVX02002193.1, the first exon in this wgs sequence is assumed to be the same exon 4 and is not given here.

#### Coding exon 5 Exon type: c'n

**Note:** See exon 4 comment.

ACTGTCTGTTGTTTTGCTGGAACAAAGGTGCTGTCCAAAGATTACACAAGTGGTGTTCCTTCCACTTCATCCA  
GAGCAATGAATGGCCTGAGCATTCCACTGGTGAGCATGATATCTGCAGTGGAGTCAGCTCTGAGCACCAG  
TGTGAGCAGTGACAGCTCAGCTGTTAAGTGTGATAGTGTGATTTCTGTCCAGATGGAAACACTTGTCTG  
CGACAAAACACTGGACATTGGAGCTGCTGCCCCATCCTCAG

#### Coding exon 6 Exon type: c'n

**Note:** See exon 4 comment.

ACTGTGTGTTGTTTTGGTGGCACACGATGCTGTCCAAAGATTTTTCTACTTTGTTCAAGACATCAAGTA  
GTCTGAGCGTTCCAGTTAACAGGATGAAACCTGTAATGGAGATAAACGCTTTGAGCATTGAGTTAACAG  
TGGCAGATCAGTCACATACTGTGATAATCTGCATTACTGTTCTGCTGAAAATACATGTTGCAGACTGCCT  
AGTGGATCTTGGGGATGTTGCCCATTCCTTCT

#### Coding exon 7 Exon type: cn

GCTACATGTTGTAATGATGGTGTGCACTGCTGTCTCATGGCAATGATGATGAGAAAATTCCTTCT  
GTACAACGGATAGTATCCGTATCCCATGGTTCAACAAAAAACCCTGCACTCATCGAACAGACGTTGTCAA  
TAGTGTGGTTCGTGATAGTTCCGGTGGTCAACTGTGATAAGACATATTTTTGTAAGATGGACTGACCTGT  
TGTC AACGGCTATGGGAAGATGGGGATGTTGCCATTTCTAAT

#### Coding exon 8 Exon type: c

**Note:** up to the stop codon

GGTCAATGTTGTAAGATAAAACAAACCTGCTGCCCTCGGCACTACAAATGTAGTGGGGTCCCAAAACAA  
TGACCTGCAAAATGGAAAATCTGGAACTAG

**Genomic sequence note:** A genomic sequence is not presented (see note 2 in header).

**Species:** *Gallus gallus (chicken)*

**Taxonomy (via NCBI):** *Eukaryota; Metazoa; Chordata; Craniata; Vertebrata; Euteleostomi; Archosauria; Aves; Neognathae; Galliformes; Phasianidae; Phasianinae; Gallus.*

**General Comment:** Transcript well defined by EST data. Partial genomic data in 2 unconnected wgs sequences.

**Protein Sequence**

MRTALTLWLALIGGAAVTALRCPDGAASECPQNTTCCGTASGAWGCCPMPEAVCCRDEEHCCPHSTSCDLE  
RGRCVSPITGDVPMATKFFPAWKRPRAAAQPRLRVPAVALLRVQCPDNSSACPDGATCCQLPSGRYGCCPL  
QNAVCCGDGWHCCPQGTACDLQRSMCTSVRDVARVGDVKCDDMSPDGNSTCCRLSSGQWGCCPLEQAVC  
CPDHIHCCPQGYTCDPQGGTCLQGGVRLPWLRLKTPALWGRGGDVRCDRTSCP DGSTCCRLSSGAWGCCP  
LEQAVCKDHQHCCPQGYTCDIATQSCEKL\*

**Transcript:**

The cDNA data define the transcript well (below), so no predicted sequence is required.

**cDNA data:**

**From:** NCBI: Chick\_pgn\_EST\_contig of GI: 20209372, 5884962, 46297579, 6477511, 53546304, 15085465, 14004522, 68327488, 18611534, 18471080, 32372599, 14005635, 18608360, 15083859, 25365290, 75477822, 30954406, 18611004, 46302282, 18612424, 18431575, 14475114, 25340793, 25746988, 90217465, 41336278, 14006743

**Note:** cDNA sequence data:

GAGGGGGCGTGGCTCGCGGAGGGGAGGGGCGGGGCGTGAAGGGAGGAGAGTCCGGAGCGTGCAGGGTG  
TCCCGGCCATGAGGACGGCGCTGACGCTGTGGTTGGCCCTCATGGGGGCGTGCAGGTGACGGCGCTGCG  
GTGCCCCGACGGCGCCTCCGAGTGCCCCAAAACACCACATGCTGCGGCACCGCGAGCGGAGCCTGGGGG  
TGCTGCCCCATGCCGGAGGCCGTGTGCTGCCGGGATGAGGAGCACTGCTGTCCCCACTCCACCAGCTGTG  
ATTTGGAGCGCGGGCGCTGTGTGTCCCCACGGGGGACGTCCCCATGGCCACAAAATCCCGCCTGGAA  
GAGACCGCGCGGTGCTGCGGCACAGCCCCGGCTCCGCGTCCCAGCAGTGGCGCTGCTCCGGGTGCAGTGT  
CCCCACAACAGCTCCGCGTGTCCCGACGGCGCCACGTGCTGCCAGCTGCCCTCGGGGCGCTACGGCTGCT  
GTCCCCTGACAGAACCGCGTGTGCTGCGGCGACGGGTGGCACTGCTGTCCCCAGGGCACCGCGTGTGACCT  
GCAGCGCTCCATGTGCACCTCGGTGCGGGACGTGGCGCGCTTGGCGACGTGAAGTGTGACGATGAGATG  
AGCTGTCCCCGACGGGAACAGCTGCTGCAGGCTGAGCTCCGGGCGAGTGGGGGTGCTGCCCGCTGGAGCAGG  
CCGTGTGCTGCCCGACCCACATCCACTGTGCCCGAGGGCTACACCTGCGACCCCCAGGGGGGACGTG  
CCTGCAGGGGGGGGTCCGCTGCCCTGGCTGAGGAAGACCCCCGGCACTGTGGGGTTCGGGGTGGGGACGTG  
CGGTGCGACGACAGGACGAGCTGTCCCCGATGGGAGCACGTGCTGCAGGCTGAGCGGGGGCGCTGGGGGT  
GCTGCCCTCTGGAGCAGGCTGTGTGCTGTAAGGACCACAGCACTGTGCCCGAGGGCTACACCTGCCA  
CATCGCCACGCAGAGCTGCGAGAAGCTGTGACCCCCCGGGGCTGTGACCCCCCACCCCAATAAAGGGT  
TTGTAGGAAAAAAACCCAAAGGATTTTGGGGGAGGAAGAGGCGGAGGC

**Genomic data:**

**Note:** Genomic sequence remains very limited. There are two whole genome shotgun contigs which do not overlap. Numbering of the coding exons is based upon comparison with data from the Zebrafish, which, while also incomplete, gets closer to the beginning of the gene.

From NCBI: AADN03008716.1 GI:354533746

**Note:** The exon sequences are from the reverse complement of the contig.

**Coding exon 4 Exon type: n**

CGCTGCTCCGGGTGCAGTGTCCCCACAACAGCTCCGCGTGTCCCGACGGCGCCACGTGCTGCCAGCTGCC  
CTCGGGGCGCTACGGCTGCTGTCCCCTGACAGAAC

**Coding exon 5 Exon type: c**

GCCGTGTGCTGCGGCGACGGGTGGCACTGCTGTCCCCAGGGCACCGCGTGTGACCTGCAGCGCTCCATGT  
GCACCTCGGTGCGGGACGTGGCGCGCG

**Coding exon 6 Exon type: n**

TTGGCGACGTGAAGTGTGACGATGAGATGAGCTGTCCCGACGGGAACACGTGCTGCAGGCTGAGCTCCGG  
GCAGTGGGGGTGCTGCCCGCTGGAGCAG

**Coding exon 7 Exon type: cn**



**Note:** Incomplete at the end of the sequence data. The expected completion is added in lower case based upon the cDNA sequece.

```
GCCGTGTGCTGCCCCGACCACATCCACTGCTGCCCCAGGGCTACACCTGCGACCCCCAGGGGGGGACGT
GCCTGCAGGGGGGGTCCGCCTGCCCTGGCTGAGGAAGACCCCGCGCTGTGGGGTCGGGGTGGGGACGT
GCGGTGCGACGACAGGacgagctgtcccgatgggagcacgtgctgcaggctgagcgggggcgcgctggggg
tgctgccctctggagcag
```

From NCBI: AADN03022721.1 GI:354519740

**Coding exon 8 Exon type: c**

**Note:** Up to the stop codon.

```
GCTGTGTGCTGTAAGGACCACCAGCACTGCTGCCCCAGGGCTACACCTGCGACATCGCCACGCAGAGCT
GCGAGAAGCTGTGA
```

**Genomic sequence note:** A genomic sequence is not presented (see note 2 in header).

---

00018 **Danio rerio progranulin 1** Short name: **D\_rer1 or Dr1** Date entered: 2014-03

**Species:** *Danio rerio* (zebrafish)

**Taxonomy (via NCBI):** *Eukaryota; Metazoa; Chordata; Craniata; Vertebrata; Euteleostomi; Actinopterygii; Neopterygii; Teleostei; Ostariophysi; Cypriniformes; Cyprinidae; Danio.*

**General Comment:** Good cDNA and genomic data.

### Protein Sequence

```
MFPVLMLLMAALVAADEPLLDLSIPVETVDTASVIHCDAQTVCPDGTTCCLSPYGIWSCPYSMGQCCR
DGIHCCQHGYRCDSTSTRCLRGWLTLPSSFQKATRTFQKDQTHAETVQCEGNFYCPAEKFCCKTRTGQWG
CCSGLEL*
```

### Transcript:

The cDNA data define the transcript well (below), so no predicted sequence is required.

### cDNA data:

**From:** NCBI: AF273479.1 GI:14279723

**Note:** cDNA sequence data:

```
ATGTTCCCAGTGTGATGTTACTCATGGCGGCTCTGGTGGCTGCAGATGAGCCTCTGCTTGATCTGTCTA
TCCCAGTGGAGACTGTAGACACCTCTGCCTCTGTGATTCACCTGCGATGCTCAAACCTGTGTGTCCAGACGG
AACAAATGCTGTCTGAGTCCATATGGCATATGGTCATGTTGTCTTACTCAATGGGTCAGTGTTCAGG
GATGGGATTCACCTGTTGTCAACATGGATATCGCTGCGATTCCACCTCCACCCGATGCCGCGGGCTGGC
TGACGCTGCCATCGTCTTTCCAGAAGGCCACCAGAACCTCCAGAAAGATCAGACCCACGCTGAGACTGT
CCAATGTGAAGGAAATTTCTACTGCCCGGCTGAGAAGTTTTGTGCAAGACTAGAACTGGCCAGTGGGGC
TGCTGCAGCGGGTTGGAGTTGTAAGCAAACAACCACTGTTACACTGGTTCACCTCTTACTGAAGACTGTC
AAAATGCAAGAGGCTCCAAACTTCATTCATGTTTCAGGCTATATTTCTTACATCCAGGCTGAATTAGTGTG
AAATAAAAACTAATAGAATTACTGTCAAAATGCACCGTCAAGG
```

### Genomic data:

**Note:** Genomic data (exons).

From NCBI: NC\_007130.5 (41147019..41152510, complement)

**Note:** Also in Ensembl grn1 ENSDARG0000089362 Chromosome 19: 41, 147, 019-41, 152, 591 reverse strand.

**Coding exon 1 Exon type: sn**

**Note:** from the start codon

```
ATGTTCCCAGTGTGATGTTACTCATGGCGGCTCTGGTGGCTGCAGATGAGCCTCTGCTTGATCTGTCTA
TCCCAGTGGAGACTGTAGACACCTCTGCCTCTGTGATTCACCTGCGATGCTCAAACCTGTGTGTCCAGACGG
AACAAATGCTGTCTGAGTCCATATGGCATATGGTCATGTTGTCTTACTCAATG
```

**Coding exon 2 Exon type: c**

```
GGTCAGTGTTCAGGGATGGGATTCACCTGTTGTCAACATGGATATCGCTGCGATTCCACCTCCACCCGAT
GCCTGCGGGGCTGGCTGACGCTGCCATCGTCTTTCCAGAAGGCCACCAGAACCTCCAGAAAGATCAG
```

**Coding exon 3 Exon type: n**

**Note:** unpaired with a c-exon encodes a paraganulin.

ACCCACGCTGAGACTGTCCAATGTGAAGGAAATTTCTACTGCCCGGCTGAGAAGTTTTGCTGCAAGACTA  
GAACTGGCCAGTGGGGCTGCTGCAGCG

**Coding exon 4 Exon type: termination and (not shown) 3'ut**

**Note:** up to the stop codon

GGTTGGAGTTGTAA

**Genomic sequence note:** A genomic sequence is not presented (see note 2 in header).

---

00019 **Danio rerio progranulin 2** Short name: **D\_rer2 or Dr2** Date entered: 2014-03

**Species:** *Danio rerio* (zebrafish)

**Taxonomy (via NCBI):** Eukaryota; Metazoa; Chordata; Craniata; Vertebrata; Euteleostomi; Actinopterygii; Neopterygii; Teleostei; Ostariophysi; Cypriniformes; Cyprinidae; Danio.

**General Comment:** Good cDNA and genomic data.

**Protein Sequence**

MFPVLMLLMAALVAADEPLLDLSIPMETEDVSASVIHCDARTVCPDRITCCRTPYGKWTCCPFPMGQCCR  
DGIHCCRHYRCNFASTRCLRGLWLSLPSFQEATRFEKDTQAETVQCEGNFYCPAEKFCCKTGTGQWG  
CCSELEL\*

**Transcript:**

The cDNA data define the transcript well (below), so no predicted sequence is required.

**cDNA data:**

**From:** NCBI: NM\_212756.1 GI:47086536

**Note:** cDNA sequence data:

ATGTTCCCAGTGTGATGTTACTCATGGCGGCTCTGGTGGCTGCAGATGAGCCTCTGCTGGATCTGTCCA  
TTCCGATGGAGACTGAAGACGTCTCTGCCCTCTGTGATTCACTGCGATGCTCGAACTGTGTGTCCAGATAG  
AACAAACATGCTGTCCGACTCCATATGGCAAATGGACATGTTGTCCCTTCCCAATGGGTCAGTGTTCAGG  
GATGGGATTCACTGCTGTCGACACGGTTATCGCTGCAATTTCCGCTCCACCAGATGCCGAGGCTGGC  
TGTCACTGCCATCGTCTTTCCAGGAGGCCACCAGAACCTTCGAGAAAGATCAGACCCAGGCTGAGACTGT  
CCAATGTGAAGGAAATTTCTACTGCCCGGCTGAGAAGTTTTGCTGCAAGACTGGAACCTGGCCAGTGGGGC  
TGCTGCAGTGAGTTGGAGTTGTAAGCAAACAACCACTGTTACACTGGTTCACCTCTTACTGAAGACTGTC  
AAAATGCAAGAGGC

**Genomic data:**

**Note:** Genomic data (exons).

From NCBI: NC\_007130.5 (41156407..41159839, complement)

**Note:** Also in Ensembl grn2 ENSDARG00000088641 Chromosome 19: 41, 156, 804-41, 159, 440 reverse strand.

**Coding exon 1 Exon type: sn**

**Note:** from the start codon.

ATGTTCCCAGTGTGATGTTACTCATGGCGGCTCTGGTGGCTGCAGATGAGCCTCTGCTGGATCTGTCCA  
TTCCGATGGAGACTGAAGACGTCTCTGCCCTCTGTGATTCACTGCGATGCTCGAACTGTGTGTCCAGATAG  
AACAAACATGCTGTCCGACTCCATATGGCAAATGGACATGTTGTCCCTTCCCAATG

**Coding exon 2 Exon type: c**

GGTCAGTGTTCAGGGATGGGATTCACTGCTGTCGACACGGTTATCGCTGCAATTTCCGCTCCACCAGAT  
GCCTGCGAGGCTGGCTGTCACTGCCATCGTCTTTCCAGGAGGCCACCAGAACCTTCGAGAAAGATCAG

**Coding exon 3 Exon type: n**

**Note:** unpaired with a c-exon encodes a paraganulin.

ACCCAGCTGAGACTGTCCAATGTGAAGGAAATTTCTACTGCCCGGCTGAGAAGTTTTGCTGCAAGACTG  
GAACTGGCCAGTGGGGCTGCTGCAGTG

**Coding exon 4 Exon type: termination and (not shown) 3'ut.**

**Note:** up to the stop codon.

AGTTGGAGTTGTAA

**Genomic sequence note:** A genomic sequence is not presented (see note 2 in header).

**Species:** *Danio rerio* (zebrafish)

**Taxonomy (via NCBI):** Eukaryota; Metazoa; Chordata; Craniata; Vertebrata; Euteleostomi; Actinopterygii; Neopterygii; Teleostei; Ostariophysi; Cypriniformes; Cyprinidae; Danio.

**General Comment:** Good genomic and transcript data. in the middle repeat of very similar module sequences, EST data support a possible 1 or 2 additional modules encoded in the transcript from a -c-n- exon repeat, but not an additional cn exon.

### Protein Sequence

MLRLTVCLAVVTLVICSQCPDNEVCEAGQSCCQDPTGGFSCCPFHGECEDHLHCCPEGMLCSVKDLTC  
TNATHTEPLADRTQAKKPDLPKSFMRMIF SMPASESDI SCPDGSSCPAEFSCLLMSTSYGCCPVAQGLACS  
DGKHCCPNDEHCESSDSSLCVKKRVKVVETVLCNGTSECPADTTCCQAEDGLWGCCPMPKAVCCDDKIHCC  
PEDTVCDVKALKCISSTNQELPMWDKFFPARLRAEWEDHKQKKPETQRTTTRPTGTTSTNTAANQM TTLPA  
EHQAVSSDVPCNDTAACADGTTCCCKTKDGGWACCPLEAVCCEDFIHCCPHGKKCDVAAGSCDDPSGSVP  
WVEKVPVVRPIKKQKVAVTQVSSLSDDVPCNDTAACADGTTCCCKTKDGDWACCPLEAVCCEDFVHCCPKG  
KKCNIAAMKCEDPSTGEPLVKQTPVQSTTTPNVIGKQKSNVPCNDTAACADGTTCCCKTKDGDWACCPLE  
EAVCCEDFIHCCPHGKKCDLAAGSCDDPSGSVPWVEKVPVVRPIKKQKVAVTKVSSVSSDVPCNDTAACAD  
GTTCCCKTKEGGWACCPLEAVCCEDFIHCCPHGKKCNVAAGSCDDPSGSVPWVEKVPVHLRAGQRSSGKV  
KCNATHGCPESSTCKNIAGEWGCCPFSQAVCCTDGEHCCPAHYKCNLSSVSCIKGDVVIPWYNKIAAES  
TPAPKLDLGVVKCDEQSSCSADSTCCLLSKEETGCCPFPEAVCCPDQKHCCPEGYRCDLRRRSCVKTTTL  
YVEITQLTHIRSNKPQPSVIVKDVQCGGGFSCHDGETCCPTSQTWGCCPSPKAVCCDDMQHCCPAGYKC  
GPGGTCISAGDL DWSNWNWNLFFSKKKRALTL\*

### Transcript:

The cDNA data define the transcript well (below), so no predicted sequence is required.

### cDNA data:

**From:** NCBI: AF375477.3 GI:77744586

**Note:** This cDNA sequence is the one used in our analyses.

CAAAGGCAGACCTCTAATAAAGCGGAGCTTTAAAGAATTTTACATTTAAGAGCAATCTTTAATTAATGC  
AAGCACAGTGTGGGGAGGCAGCGAGGTGACAGGATCGGTAACCTTGGACCCTAAGGATCCACGGACTGATC  
ATTTACTTTCCGCTGTTACAAAATCCACCTGCTCAAAAAATGTTGAGACTGACAGTCTGCCCTCGTGTGG  
TGACCCTGGTTATTTGCTCGCAGTGCCCCGATAATGAAGTCTGTGAAGCAGGCCAGTCTGCTGCCAGGA  
TCCCCTGGTGGCTTCAGCTGCTGCCCTTTCCATCATGGAGAGTGTGTGAAGACCATCTGCACTGCTGT  
CCCGAAGGCATGTTGTGACAGTGTGAAGGACTTAACATGTACAAACGCAACACATACAGAGCCATTGGCGG  
ACAGGACACAAGCTAAAAAGCCAGACCTTCCCAAATCATTCAGAAATGATCTTCTCCATGCCGCAAGTGA  
AAGCGACATCAGCTGCCCTGACGGCTCTTCCGTCTGCTGAGTCTTCCGTCTGCTGATGCTACATCA  
TATGGCTGCTGTCCAGTAGCACAGGGCTTGCATGTTCTGATGGGAAACACTGCTGCCCAAATGACCATG  
AATGCAGTCTGACAGCAGCTTGTGTGTCAAACGGAAAGTAAAAGTTGAGACTGTTCTTTGTGGAATGG  
GACGTCGGAGTGTCTGCAGACACTACATGTTGTGAGGCTGAAGATGGCCTATGGGGGTGCTGCCCATG  
CCAAAGGCTGTATGCTGTGATGACAAAATCCATTGCTGCCAGAGGACACTGTTTGTGACGTCAAAGCCT  
TGAAAATGCATATCTCAACCAACCAGGAGCTGCCCATGTGGGACAAAATCCCTGCTCGCCTTAGGGCTGA  
ATGGGAAGATCACAAACAAAAAAGCCTGAAACTCAACGCACTACAAC TAGACCTACAGGCACTACAAGC  
ACTAATACAGCTGCCAACCAAATGACTACGCTGCCGAAACCAAGCGGTGCTTCAGATGTTCCCT  
GTAACGACACTGCGGCCGTGTGCTGATGGAACCACATGCTGTAAGACTAAAGATGGAGGATGGGCCGTGTG  
TCCTCTGCCCTGAGGCCGTGTGTTGTGAAGACTTCATCCACTGCTGTCTCATGGTAAGAAATGTGATGTA  
GCTGCAGGATCCTGTGATGACCTTCAGGCTCTGTGCCCTGGGTGGAGAAGGTGCCGTGCCGTCCAATCA  
AAAAACAGAAAGTGGCGGTTACACAAGTTTCTTCACTGTCTTCAGATGTTCCCTGTAACGACACTGCGGC  
CTGTGCTGATGGAACCACATGCTGTAAGACTAAAGATGGAGATTGGGCCGTGTGCTCTGCCCTGAGGCC  
GTGTGTTGTGAAGACTTTGTCCATTGCTGTCTTAAGGCAAGAAATGTAACATTGCTGCTATGAAATGTG  
AAGACCTTCATGTACCGGAGAGCCCTTGGTAAAACAGACGCTGTGCAATCAACCACGACTCCCAATGT  
GATTGGCAAACAGAACTAATGTTCCCTGTAACGACACTGCGGCCGTGTGCTGATGGAACCACATGCTGT  
AAGACTAAAGATGGAGATTGGGCCGTGTGCTCTGCCCTGAGGCTGTGTGTTGTGAAGACTTCATCCACT  
GCTGTCTCATGGTAAGAAATGTGATTTAGCTGCGGGGTCTGTGATGACCTTCAGGCTCTGTGCCCTG  
GGTGGAGAAGGTGCCCGTCCGTCCAATCAAAAAACAGAAAGTGGCTGTTACAAAAGTTTCTTCAGTGTCT  
TCAGATGTTCCCTGTAACGACACTGCGGCCGTGTGCTGATGGAACCACATGCTGTAAGACTAAAGAAGGAG  
GATGGGCCGTGTGCTCTGCCCTGAGGCCGTGTGTTGTGAAGACTTCATCCACTGCTGTCTCATGGTAA  
GAAATGTAACGTAGCTGCGGGTCTGTGATGACCTTCAGGCTCTGTGCCCTGGGTGGAGAAGGTGCC

GTCCATCTTAGAGCAGGTCAGAGGTCATCTGGGAAAAGTGAAATGCAACGCTACTCATGGTTGTCCTGAAT  
CTAGTACATGCTGTAAGAACATTGCTGGTGAATGGGGCTGCTGCCTTTCTCTCAGGCTGTATGTTGCAC  
AGATGGAGAGCACTGCTGTCCGGCCACTATAAGTGTAACTGAGCAGTGTGTCTTGTATTAAGGGAGAC  
GTGGTGATCCCCTGGTACAATAAAAATCGCTGCTGAAAAGCACACCAGCTCCAAAAGTTGGATCTCGGCGTTG  
TTAAATGCGATGAACAGTCGAGTTGCTCTGCAGATTGACCTGCTGCCTCTTGTCTAAAAGAAGAAACGGG  
CTGCTGCCCTTTTCTGAGGCTGTTTGTGCCAGACCAGAAGCACTGCTGCCTGAGGGCTACAGATGT  
GACCTGCGCAGACGCTCCTGTGTAAAGACCACTCGGCTGTACGTGGAAATTACTCAACTCACTCACATCC  
GCAGCAACAAGCCCCAGCCAAGTGTATAGTGAAGGACGTTTCAAGTGTGGTGGTGGATTGAGCTGTATGA  
TGGTGAGACCTGCTGTCCAACCTCACAAACCACATGGGGATGTTGCCCGTCTCCAAAGGCGGTGTGCTGT  
GATGATATGCAACACTGCTGTCCCGCGGGGTATAAGTGTGGGCCGGGTGGCACCTGTATTTTCAGCCGGAG  
ACTTGGACTGGAGCAACTGGGTCAACTGGAAGTTGTTCTTCTCCAAAAAGAAAACGAGCCCTAACTCTATA  
AACATCACAGCAGCACATTGATTTTTACCAAAGCACTTACATGCTCAAGTGTCTGATATTTTTTTCACA  
TTTTACATTCTCAATGTAATAATCAGTGATAATCAGATGATTAATTTACATGGTTGATTTTTATTTGCA  
GAAGAAAATGTTTAATAAGGACTCATTGTTGTAAGTTTCCATTGTCTAAAAGGTAATACCAACTACGCTT  
TAGTCAGAAAAGTATGTGTCATTTTTGTAAAGTGTGTTTATAAAAATGACCATCGTTACTGCTTAGTGCTGT  
CTGAGGATTTATTTATTTTCTAAATGGTGTAAAGATGTAACATATTAAGCGTAGATGACCTCTAGTGGC  
ATATCTTTTATTATAACTCGCATGTGGAATGTCAGGTTTATAGGTTACATTATTTTCAGACTTGACATCA  
TGCAGTCTTGTGATTATGACTAGATCACCTTGACAAGGAAATGTTTTAAATGAAGATCTACCAGATATC  
CTCTTTTTAATTTCCCTTGGTCTTTACTCTACTTTTGTGTGTAACTTTTTTTTCTTCATTAATTTAAAGGG  
TTTTAATACTATATTGATTGAGCTTTGTGAAAAGATATCTTAAAGATTTCTCAGCATTCTGTATTGAATA  
TTTCTCACAGCGCATCTGAAACCTTGTGAGCTGTAAAAGAGAAAATAAAAAAGAAAATGCTTGTGTGTTTT  
CTTTTGTATCTCTGTTCACTTTTTTCCAATTTTCAATTTGTATTTGAGCATTTAGCAGACTAAAAATCAGTGG  
AATCCAGTATTGTTTTGAACACAAAATGACCTTTTCAATAAACTGAAATAAACATTCTTCTGAATTTCTAAA  
AAAAAAAAA

### Genomic data:

**Note:** Genomic data (exons). Exons from the genomic reference assembly sequence are presented here. They are for the maximum transcript.

From NCBI: NC\_007114.3 GI:189908168

**Note:** Genomic reference assembly sequence. Also found in grna ENSDARG0000004954 Chromosome 3: 30, 065, 546-30, 092, 476 reverse strand.

#### Coding exon 1 Exon type: sn

**Note:** from start codon

ATGTTGAGACTGACAGTCTGCCTCGCTGTGGTGACCCTGTTTATTGCTCGCAGTGCCCAATAATGAAG  
TCTGTGAAGCAGGCCAGTCTGCTGCCAGGATCCCACTGGTGGCTTCAGCTGCTGCCCTTTCCATCAT

#### Coding exon 2 Exon type: c

GGAGAATGTTGTGAGGACCATCTGCACTGCTGTCTGAAAGGCATGTTGTGCACTGTTAAGGACTTAACAT  
GTACAAACGCAACACATACACAGCCATTGGCAGACAGGACACTAGCTAAAAAGCCAGACCTTCCCAAA

#### Coding exon 3 Exon type: n\*

**Note:** n\* = encodes N-half of a 10 cys module

TCATTCAGAATGATCTTCTCAATGCCTGCAAGTGAAGCGACATCACCTGTCTGACGGCTCCTCTGTG  
CTGCTGAGTTCTCTTGTCTGCTGATGTCTACATCATAACGGCTGCTGTCCAGTAGCACAG

#### Coding exon 4 Exon type: c\*

**Note:** c\* = encodes C-half of a 10 cys module

GGCCTTGCAATGTTGGATGGGAAACACTGCTGCCCAAATGACCATGAATGCAGTACTGACAGCAGCTTGT  
GTGTCAGCGAAAAAG

#### Coding exon 5 Exon type: n

TAAAAGTTTCACTGTTCTTTGTGGAAACGGGACATCGGAGTGTCTGCAAGATACTACATGTTGTGAGGC  
TGATGATGGCCAATGGGGTTGCTGCCCCATGCCAAAAG

#### Coding exon 6 Exon type: c

GCTGTATGCTGTGATGACAAAATCCACTGCTGCCAGAGGACACTGTTTGTGACGTCAAAGCCTTGAAAT  
GCGTATCCTCAACCAACCAGGAGCTGCCCATGTGGGACAAAATCCAGCTCGCCTTAGGGCTGAATGGGA  
AGATCACAAAAC

#### Coding exon 7 Exon type: j

**Note:** j = encoding only more inter-module joining sequence.

AAAAAAGGCCTGAAACTCAACGCACTACAGCTAGACCTACAGGCACTACAAGCACTACTACTGCAGCTAA  
CCAAATGACTACGCTGCCTGCCGAACACCAAGGGG

**Coding exon 8 Exon type: n**

TGCTTCAGATGTTGCTTGTAACGACACTGCGGCTGTCTGATGGAAGCACTTGCTGTAAGACTAAAGA  
TGGAGGATGGGCTGCTGTCTCTGCCTGAG

**Coding exon 9 Exon type: c**

GCCGTGTGTTGTGAAGACTTCATCCACTGCTGTCTCATGGTAAGAAAATGTGACGTAGCTGCGGGGTCCT  
GTGAAGACCCTTCAGGCTCTGTGTCTGGGTGGAGAAGGTTCTGTCCGTCTATTAGAAAAACAGAAAAGT  
GGCTGTTACACAAG

**Coding exon 10 Exon type: n**

TCTCTCAGTGCTTCAGATGTTCCCTGTAACGACACTGCTGCCTGTGCTGATGGAACCACTTGCTGTAA  
GACTAAAAGAAGGAGATTGGGCTGCTGTCTCTGCCTGAG

**Coding exon 11 Exon type: c**

GCCGTGTGCTGTGAAGACTTTGTCCATTGCTGTCTAAGGGCAAGAAAATGTAACATTGCTGCTATGAAAT  
GTGAAGACCCTTTATGTACCGAAGAGCCCTGGTAAAACAGACACCTGTGCAATCACTACTACTCCAA  
TGTGATTGGCACACAGA

**Coding exon 12 Exon type: n**

AGTCTGACGTTCCCTGTAACGACACTGCAGCCTGTCTGATGGAAGCACATGCTGTAAAGACTAAAAGATGG  
AGGATGGGCTGCTGTCTCTGCCTGAG

**Coding exon 13 Exon type: c**

GCCGTGTGTTGTGAAGACTTCATCCACTGCTGTCTCATGGCAAGAAAATGTGACGTAGCTGCGGGGTCCT  
GTGAAGACCCTTCAGGCTCTGTGCCCTGGGTGGAGAAGGTGCCCGTCCGTCCAATCAGGAAACAGAAAAGT  
GGCTGTTACAACAG

**Coding exon 14 Exon type: n**

TCTCTCAGTGCTTCAGATATGCTGTAACGACACTGTGGCCTGTCTGATGGAAGCACCTTGCTGTAA  
GGATAAAGATGGAGAATGGGGTTGCTGTCTCTGCCTGAG

**Coding exon 15 Exon type: c**

GCCGTGTGTTGTGAAGACTTCATCCACTGCTGTCTCATGGTAAGAAAATGTAATGTTGCTGCGGGGTCCT  
GTGATGACCCTTCAGGCTCTGTGCCCTGGATGGACAAGGTGCCCGTCCGTCCAATCAAAAAACAGAAAAGT  
GGCTGTTACACAAG

**Coding exon 16 Exon type: n**

CCTCATCAGCATCTTCAGATGTCCCCTGTAACGACACTGCGGCTGTCTGATGGAAGCACATGCTGTAA  
AACTAAAAGATGGAGGATGGGCTGCTGTCTCTGCCTGAG

**Coding exon 17 Exon type: c**

GCCGTGTGTTGTGAAGACTTCATCCACTGCTGTCTCATGGCAAGAAAATGTGACGTAGCTGCGGGGTCCT  
GTGAAGACTCTTCAGGCTCTGTGCCATGGGTGGAGAAGGTGCCCGTCCGTCCAATCAGAAAACAGAAAAGT  
GGCTAATACAAAAG

**Coding exon 18 Exon type: n**

TCTCTCAGTGCTTCAGATGTTGCCTGTAACGACACTGTGGCCTGTCTGATGGAAGCACCTTGCTGTAA  
GGATAAAGATGGAGATTGGGGCTGCTGTCTCTGCCTGAA

**Coding exon 19 Exon type: cn**

GCCGTGTGTTGTGAAGACTTCATCCACTGCTGTCTCATGGTAAGAAAATGTAACGTTGCTGCGGGGTCCT  
GTGATGACCCTTCAGGCTCTGTGCCCTGGGTGGAGAAGGTCCCGTCCATCTTAGAGCAGGTCAGAGGCC  
ATCTGGCAAAGTGAATGCAACGCTACTCATGGTTGCCCTGAATCCAGCACTTGCTGTAAAGAACATTGCT  
GGAGAATGGGGCTGCTGTCTCTTCTCTCAG

**Coding exon 20 Exon type: cn**

GCTGTATGTTGCACAGATGGAGAGCACTGCTGTCCGGCCCACTATAAGTGTAACTGAGCAGTGTGTCTT  
GTATTAAGGGAGACGTGGTATCCCTGGTACAATAAAAATCGCTGTGAAAGCACACCAGTCCAAAAGTT

GGATCTCGGCGTTGTTAAATGCGATGAACAGTCGAGTTGCTCTGCAGATTGCACCTGCTGCCTCTTGCT  
AAAGACGAAACGGGCTGCTGCCCTTTCTCTGAG

**Coding exon 21 Exon type: cn**

GCTGTTTGTCTGCCAGACCAGAAGCACTGCTGTCTGAGGGCTACAGATGTGACCTGCGCAGACGCTCCT  
GTGTTAAAGACCACTAGGCTGTACGTGGAAATTACTCAACTCACTCACATCCGCAGCAACAAGCCCCAGCC  
AAGTGTGTAGTGAAGGACGTTTCAGTGTGGTGGATTACAGCTGTCATGATGGTGAGACCTGCTGTCTA  
ACCTCACAACCCACATGGGGATGTTGCCCTTCTCCAAAG

**Coding exon 22 Exon type: c**

**Note:** up to the stop codon

GCGGTGTGCTGTGATGATATGCAACACTGCTGTCCCGCGGGGTATAAGTGTGGGCCGGGTGGCACCTGTA  
TTTCAGCCGGAGACTTGGACTGGAGCAACTGGGTCAACTGGAGTTGTTCTTCTCCAAAAAGAAACGAGC  
CCTAACTCTATAA

**Genomic sequence note:** A genomic sequence is not presented (see note 2 in header).

---

00017 **Danio rerio progranulin B** Short name: **D\_rerB or DrB** Date entered: 2014-03

**Species:** *Danio rerio* (zebrafish)

**Taxonomy (via NCBI):** Eukaryota; Metazoa; Chordata; Craniata; Vertebrata; Euteleostomi; Actinopterygii; Neopterygii; Teleostei; Ostariophysi; Cypriniformes; Cyprinidae; Danio.

**General Comment:** Good cDNA and genomic data.

**Protein Sequence**

MVRAAFIALLCVCVNACTALICPDGGMCEDENTCCCLTPSGGYGCCPLPHAECSSDHLHCYQGTLCBLEH  
SKCVNKHVLDWVEKVEAKLQAVVCPDGESECPDDTCCQMPDGGWCCPMKNAVCCDRKHCCPQGTTC  
DLVHSMCVSATYSSPFLRKFARRRRKPLEKNAVDLPAEVNIREVICPDKISKCPEDTTCCLLETGSYG  
CCPMPKAVCCSDQKHCCPEGTTCDLIHSTCLANGVSEMAIKIPAVTVLKPKEVVPNETVACSSGTTTC  
CKTPEGSWACCPKAVCCEDHIHCCPEGTLNVAASSCDDPTELSVSPWMEKVSTKPIAPPPNKKCDE  
SSSCPGESTCKLSSGDWGCCPLPEAVCCEDHVHCCPHGVCNVAAETCETVSDSALRISVPMVKKIPAV  
SVPSQKQNCDETSSTPTGTTCKLTSGSWACCPVQAVCCADQEHCCPQGYTCDLAQSSCVRSGLPSMAW  
FRKEPALRETQRVEDRHMCAHTSCPRDDTCCFINRIGKWGCCPLPKAVCKDGDHCCPSGYTCNEEKTS  
CTKGLHQIPWFTKKTARVWKSDELGHEDVKDSSTSCPSGSTCCILPTGQWGCCPLVKAVCCEDHEHC  
CPQGYICKLELGTCEKASADLSVSLTAVQMPETIQCDTFRCAHTQSCRLADSTWACCPYTQAVCKDMK  
HCCPMGYKCDPKVQGCTKSSSTWNNSL\*

**Transcript:**

The cDNA data define the transcript well (below), so no predicted sequence is required.

**cDNA data:**

**From:** NCBI: NM\_212738.1 GI:47086568

**Note:** This is the cDNA sequence used in our analyses. Two splice variants are reported in Ensembl. We found two EST contigs differing only in 4 codons.

CACTTTACAGCACACCGTTTTACACGGATTTCTTTACCGACTTCGTTAAATACGCACAAGAAAGTCGTTTC  
ATGGCTTTTTCATCTGTAATAATTTGAAGCACATTATTTTTGTTGGCCAAACATTCACACAATGGTGCGTGCAG  
CTTTCATAGCCTTATTATGCGTGTGTGTGAACGCATGCACTGCTCTGATCTGTCCGGATGGAGGGATGTG  
TGAAGATGAAAACACCTGCTGTCTAACGCCGTCAGGAGGATACGGCTGCTGCCCACTTCCCCATGCTGAA  
TGCTGCTCCGATCACTTGCCTGCTGTTATCAGGGAACTTTGTGCGACCTGGAACATTCCAAGTGTGTGA  
ATAAGACGCATGTTTTAGACTGGGTGGAAAAAGTCGAGGCCAAACTGCAAGCGGTAGTTTGTCCGGATGG  
AGAGTCTGAATGCCCTGATGATACCACCTGCTGCCAGATGCCTGATGGGGGCTGGGGCTGCTGTCTTATG  
AAAAATGCCGTGTGCTGTGATGATAGGAAACACTGCTGTCTCAAGGAACCACATGTGACCTTGTGCATT  
CAATGTGTGTGTCGGCCACGTATGGCTCGTCCCCTTTCTTAAGGAAATTTGCTGCTCGTCGAGGAAGCC  
ATTAGAGAAAAACGCAGTCGATCTGCCGGCAGAGGTCAACAATATTAGAGAAGTGATCTGTCCAGATAAG  
ATTTCCAAAATGTCCAGAAGATAACAATGCTGTTTACTAGAGACCGGTAGTTACGGATGCTGTCCAATGC  
CAAAGGCTGTGTGTTGTTCTGATCAAAAAGCACTGCTGTCCAGAGGGCACGACCTGTGACCTCATCCATAG  
TACGTGTTTGTGACGAAATGGAGTCTCAGAAATGGCCATTAAGATCCCAGCTGCTACTGTTCTGAAAACC  
AAAGAAGAAGTAGTTCCTGTAATGAAACCGTGGCGTGTCTAGTGGCACCACCTGCTGTAAAAACGCCAG  
AAGGCTCCTGGGCTGTGCTCTTTACCAAAGCAGTGTGTTGTGAGGATCACATTCCTGTTGTCCAGA

AGGAACGTTGTGTAATGTTGCGGCCAGCTCCTGTGATGACCCACAGAGCTTTCTGTGTCTGTGCCCTGG  
ATGGAGAAGGTGTCCACCAAACCATCGTCTCCTCCTAATAAGAAATGTGACGAAAGCTCATCGTGTG  
CTGGAGAATCCACCTGCTGCAAACCTCTCATCTGGAGACTGGGGCTGCTGCCACTGCCTGAGGCAGTGTG  
TTGTGAGGACCATGTCCACTGTTGTCCCCATGGCTCAGTGTGTAATGTGGCTGCTGAAACCTGTGAAACT  
GTCAGTGATTTCGGCTCTTCGTATTTCTGTGCCAATGGTGAAGAAGATCCCTGCAGTGTCTGTGCCATCAC  
AGAAAACAAACTGTGATGAAACGCTCTTCGTGTCCAACCGGGACCACCTGCTGTAAACTGACCTCCGGCTC  
CTGGGCTGCTGTCCAGTGCCACAGGCCGTGTGCTGTGCGGATCAGGAGCACTGCTGTCCACAGGGATAC  
ACGTGTGATTTGGCTCAGAGTAGCTGTGTGCGTTCCTAGCATGGCATGGTTCAGGAAGGAGC  
CTGCGCTGAGAGAAAACCGCGGTAGAGGACAGACACATGTGTGACGCTCACACCAGCTGCCCCAGAGA  
CGACACCTGCTGCTTCATCAACCGCATCGGCAAGTGGGGCTGCTGTCCACTGCCAAAGCGGTGTGCTGT  
AAGGATGGAGATCACTGCTGTCCAAGCGGTACACCTGTAACGAGGAGAAAACCTCCTGCACCAAAGGCC  
TACATCAGATCCCTTGGTTCACGAAAAAACGGCAAGAGTCTGGAAGAGTTCAGACGAGCTGCTCGGACA  
TGAAGATGTGAAGTGTGACTCCAGCACCAGCTGCCCGTCTGGTCCACCTGCTGTATTTTACCCACAGGA  
CAGTGGGGATGCTGCCCTTAGTCAAGGCCGTGTGCTGTGAGGATCATGAGCACTGCTGTCCACAGGGCT  
ACATCTGTAAGCTGGAGTTAGGGACGTGTGAGAAAAGCGTCTGCGGATCTCAGTGTCTCTGACTGCAGT  
TCAGATGCCAGAGATTCAGTGCACACCTTCACTCGTGCACACACGCAGAGCTGCTGCAGATTAGCA  
GACTCCACGTGGGCTGCTGTCTTATACACAGGCTGTGTGCTGTAAAGACATGAAGCACTGCTGCCCAA  
TGGGATACAAATGTGACCCAAAAGTCCAAGGTTGCACTAAATCATCCTCATCCACGTGGTGAATAAATTC  
TCTCTAACTGAAAAAATAGACTGACACTGAACCACAAAATATCACACACACACACACACACACTC  
AAGCATAAAGCATAGTTATTTTTTTCAGTACCTGCTTTGGAAAAGGGACTATGCCTCATCTTTCTCTTTGT  
AATATTTAGTTTTTATTGAAATACAACATATAGCAGGCTTTATGATTAAGCAGGACACACACTGAGAGAC  
TTTTATAGTCCATGAAACTGACTACAAAGCAAGAGCATTGTTTCAGTGTGATGCACACATTAAAAGCTGC  
AAGTTTTCTAGTTATCCAGAGTGAATGTGAATGTGATTTTTTTTTTTTTTTTTATAGCAAAAATTGTAGT  
TCCGGTCCCTGAAACATAAAAAATTATCATTAAAGGGTAAATGACTAGGGTAAATGACATCCTGGAGTC  
CATCGTGTTCGTAAAGATGATGATTTTTCTTGTATTTGTATTTATGATGCTGATTAACCAGTGAACC  
CATGAAAAAAAAAAAAAAAAA

**Genomic data:**

**Note:** Genomic data (exons).

From NCBI: NC\_007135.3 GI:189908166 complement(32279693..32306979)

**Note:** Also Ensemble grnb ENSDARG0000025081 Chromosome 24: 37, 836, 254-37, 861, 603 forward strand.

No exon sequence to show (or no genomic sequence entry).

**Coding exon 1 Exon type: sn**

**Note:** All but the first codon for the signal peptide and an N-half module.

GTGCGTGACGCTTTCATAGCCTTATTATGCGTGTGTGTAACGCATGCACTGCTCTGATCTGTCCGGATG  
GAGGGATGTGTGAAGATGAAAACACCTGCTGTCTAACGCCGTCAGGAGGATACGGCTGCTGCCACTTCC  
CCAT

**Coding exon 2 Exon type: c**

GCTGAATGCTGCTCCGATCACTTGCCTGCTGTTATCAGGGAACTTTGTGCGACCTGGAAACATTCCAAGT  
GTGTGAATAAGACGCATGTTTTAGACTGGGTGGAAAAAGTCGAGGCCAAACTG

**Coding exon 3 Exon type: n**

CAAGCGGTAGTTTGTCCGGATGGAGAGTCTGAATGCCCTGATGATACCACCTGCTGCCAGATGCCTGATG  
GGGCTGGGGCTGCTGTCTTATGAAAAAT

**Coding exon 4 Exon type: c**

GCCGTGTGCTGTGATGATAGGAAACACTGCTGTCTCAAGGAACCACATGTGACCTTGTGCATTCAATGT  
GTGTGTCGGCCACGTAAGGCTCGTCCCCTTTCTTAAGGAAATTTGCTGCTCGTCGAGGAAGCCATTAGA  
GAAAACGCAG

**Coding exon 5 Exon type: j**

**Note:** j = encoding only more inter-module joining sequence.

TCGATCTGCCGGCAGAGGTCAACAATATTAGAGAAG

**Coding exon 6 Exon type: n**

TGATCTGTCCAGATAAGATTTCCAAATGTCCAGAAGATACAACATGCTGTTTACTAGAGACCGGTAGTTA  
CGGATGCTGTCCAATGCCAAAG

**Coding exon 7 Exon type: c**

GCTGTGTGTTGTTCTGATCAAAAAGCACTGCTGTCCAGAGGGCAGACCTGTGACCTCATCCATAGTACGT  
GTTTGTGACAAAATGGAGTCTCAGAAAATGGCCATTAAGATCCCAGCTGTCACTGTTCTGAAACCCAAAG

**Coding exon 8 Exon type: n**

AAGAAGTAGTTCCTGTAATGAAACCGTGGCGTGTCTAGTGGCACCACCTGTGTA AAAACGCCAGAAGG  
CTCCTGGGCTTGCTGTCTTTACCAAAG

**Coding exon 9 Exon type: cn**

GCAGTGTGTTGTGAGGATCACATTCCTGTTGTCCAGAAGGAACGTTGTGTAATGTTGCGGCCAGCTCCT  
GTGATGACCCACAGAGCTTTCTGTGTCTGTGCCCTGGATGGAGAAGGTGTCCACCAAACCCATCGCTCC  
TCTCCTAATAAGAAAATGTGACGAAAAGCTCATCGTGTCTGGAGAAATCCACCTGTGCAAACTCTCATCT  
GGAGACTGGGGCTGTGCCCCACTGCCTGAG

**Coding exon 10 Exon type: cn**

GCAGTGTGTTGTGAGGACCATGTCCACTGTTGTCCCATGGCTCAGTGTGTAATGTGGCTGTGAAACCT  
GTGAAACTGTGAGTATTCGGCTCTTCGTATTTCTGTGCCAATGGTGAAGAAGATCCCTGCAGTGTCTGT  
GCCATCACAGAAAACAACTGTGATGAAACGTCCTCGTGTCCAACCGGGACCACCTGTGTA AACTGACC  
TCCGGCTCCTGGGCTGTGTCCAGTGCCACAG

**Coding exon 11 Exon type: cn**

GCCGTGTGCTGTGCGGATCAGGAGCACTGCTGTCCACAGGGATACACGTGTGATTTGGCTCAGAGTAGCT  
GTGTGCGTTCGGCTTCCCTAGCATGGCATGGTTCAGGAAGGAGCCTGCGCTGAGAGAAAACCCAGCGGGT  
AGAGGACAGACACATGTGTGACGCTCACACCAGCTGCCCCAGAGACGACACCTGTGCTTCATCAACCGC  
ATCGGCAAGTGGGGCTGTGTCCACTGCCAAAG

**Coding exon 12 Exon type: cn**

GCGGTGTGCTGTAAGGATGGAGATCACTGCTGTCCAAAGCGGCTACACCTGTAACGAGGAGAAAACTCCT  
GCACCAAAGGCCTACATCAGATCCCTTGGTTCACGAAAAAACGGCAAGAGTCTGGAAAGAGTTCAGACGA  
GCTGCTCGGACATGAAGATGTGAAGTGTGACTCCAGCACCAGCTGCCCGTCTGGCTCCACCTGCTGTATT  
TTACCCACAGGACAGTGGGGATGCTGCCCTCTAGTCAAG

**Coding exon 13 Exon type: cn**

GCCGTGTGCTGTGAGGATCATGAGCACTGCTGTCCACAGGGCTACATCTGTAAGCTGGAGTTAGGGACGT  
GTGAGAAAAGCGTCTGCGGATCTCAGTGTCTCTGACTGCAGTTCAGATGCCAGAGATTCAGTGCACAC  
CTTCACTCGCTGCGCACACACGCAGAGCTGTGCAGATTAGCAGACTCCACGTGGGCTGTGTCTTAT  
ACACAG

**Coding exon 14 Exon type: c**

**Note:** up to the stop codon

GCTGTGTGCTGTAAGACATGAAGCACTGCTGCCCAATGGGATACAAATGTGACCCAAAAGTCCAAGGT  
GCACTAAATCATCTCATCCACGTGGTGAATAATTCTCTCTAA

**Genomic sequence note:** A genomic sequence is not presented (see note 2 in header).

---

00020 **G. aculeatus progranulin A** Short name: **G\_acuA or GaA** Date entered: 2014-03

**Species:** *Gasterosteus aculeatus (stickleback)*

**Taxonomy (via NCBI):** Eukaryota; Metazoa; Chordata; Craniata; Vertebrata; Euteleostomi; Actinopterygii; Neopterygii; Teleostei; Euteleostei; Neoteleostei; Acanthomorpha; Acanthopterygii; Percomorpha; Gasterosteiformes; Gasterosteidae; Gasterosteus.

**General Comment:**

**Protein Sequence**

MMQMQVVICLALVALVGADECPDGGRCEDGHTCCNDPANGYECPLDQAECGDHHAHCCPAGTLCHAATS  
SCLNNTGVSVPWVERSPADQPLGSKSFRMIKSSAGEEDNICPDLSRCPAEFSCLKALTKFGCCPLAQGV  
CSDGKHCCPEGHQCSADCRSCIKQELVTTVLCKDGVSECPDGTTCENPDGKWACCPKAVCCEDKTHC  
CPEGTTCDVEHSKCSISPFQELVPMWAKSPARLRADWENPKQVTSKTAVEVTTVAVSPTEEEPSLTTP  
AADAMFPMHLGVSVACDATEACAGNSTCCMTPEGGWSCCPLPEAVDCEDSVHCCPKGRKCNPATQACDSE  
GRSVPWLQKVPTIPRLQVGNVSCDATHQCPDGTTCCKTATQEWACCPKAVCCDDHEHCCPTGTTCDLA  
SLSCTGASGSTPMPKTPAFVTAGPFPQSPATITKGEATKAPEEDEVVQCDSTRSCPQSNCCFMAESQ  
KWGCCPLPKAVCCSDGNHCCPTDVTCDVEKTTCTKGEVVIIPWYTKLPASASVEDDPASVQCDGQEQCPDD



NTCCQLQSGEWGCCPMPDAVCCPDKVHCCPQGYTCNMA NSCQKLLMLQLQAVPLTRVYLPEAEPTSSPS  
EQGDVVCDDQTRCPDGQTC CRTSATTWGCCPAPNAVCCSDMQHCCPEGHTCTETGGCTGNNVPHWHKWQV  
FFSNKKRSLIK\*

**Transcript:**

**Note:** Good EST data.

The cDNA data define the transcript well (below), so no predicted sequence is required.

**cDNA data:**

**From:** NCBI est: cDNA EST contig from GI:(83710864, 83710064, 76124045, 83707146, 85458543, 85438873, 76037415, 85423576, 83710293, 76124044, 83710863, 83707145, 83761577, 85423573, 83711476, 31437663, 31421034)

**Note:** A cDNA contig assembled with Cap3. The EST list for the contig gives a sufficient subset of sequences which define the transcript.

cagctcctcagccttctactatGATGCAGATGCAGGTGGTGATCTGTTTGGCTCTCGTGGCTCTCGTTGG  
GGCTGATGAGTGTCCGGATGGAGGGAGATGTGAAGACGGTACACCTGCTGCAACGACCCGGCCAACGGC  
TACGAATGCTGCCCTCTGGATCAGGCCGAGTGTGCGGGGATCACGCGCACTGCTGTCTCGCCGGAACAC  
TCTGCCACGCAGCCACGTCCAGCTGTTTGAACACCACCGGCTCCGTCCCTGGGTGGAAAGATCCCCCGC  
GGATCAGCCCGGACTCTCCAAGTCTTCAGGATGATCAAGTCGTCCGCGGGGGAGGAGGACGACAACATC  
TGTCGCCGATCTGTCCCGATGCCCGGCCGAGTTTTCTGCTGAAGGCTTTGACAAAAGTTTGGCTGCTGTC  
CGTTAGCTCAGGGAGTCCCTGCTCCGATGGGAAACACTGCTGTCTGAGGGCCACCAGTGCAGCGCAGA  
CTGCCGCTCTGTCAATCAAAACAAGAGCTTGTGACTACAGTTCTGTGCAAGGATGGAGTGTGAGAGTGTCCG  
GATGGAACCACTGCTGTGAAAACCCAGATGGAAAAGTGGGCTGCTGTCCCTGCCGAAGGCCGTGTGCT  
GCGAGGACAAGACGCACTGCTGCCCTGAAGGGACCACGTGTGATGTCGAACACAGCAAATGTTTTCCCC  
GTTTACCAAACAGGAGTTGCCATGTGGGGCAAATCGCTGCCAGTTGAGAGCGGACTGGGAGAACCCG  
AAAGAACAAGTCACTTCAAAAACGGCCGTTGAAAGTCAACACAGTACTGCACTGCTCCACCCGAGGAAAG  
AACCGTCGCTCACCACACCCGCTGCAGACGGGATGTTTTCCATGCATTTAGGCGTAAGTGTGGCCGTGTA  
TGCCACAGAAGCTGCGCAGGTAACAGCACATGCTGTATGACCCCGAGGGCGGGCTGGAGCTGCTGCCCA  
CTTCCAGAGGCTGTGACTGTGAGGATTCACTTCACTGCTGCCAAAAGGGCGAAAATGCAACCCGGCCA  
CCCAGGCTGCGATAGCGAGGGACGCTCTGTGCCGTGGCTCCAGAAGGTGCCACAAATCCCCAGACTACA  
GGTGGGGAAATGTGTCATGTGACGCCACCCACCAGTGTCCCGACGGCACCACCTGCTGCAAGACTGCAACA  
CAGGAGTGGGCTGCTGTCTCTGCCCGAGGCCGCTGCTGCGACGACCACGAGCACTGCTGCCCGACCCG  
GCACCACCTGCGACCTGGCCTCGCTCAGCTGTACCGGCGCCTCGGGCTCCACGCCCATGATGCCCAAGAC  
GCCCGGTTCTGTCACGGGGGGCCCTTTCCCCAAAAGTCCGGCAACGATCACCAGGGGAGAGGAGGGCAGC  
AAAGCGCCGGAGGAGGACGAGGTGGTTCACTGCGACTCCCGCACCAGCTGCCCTCAGTCCAACACCTGCT  
GTTTCAATGGCCGAGTCTCAGAAGTGGGGTTGTTGCCCGCTGCCGAAGGCCGTTTGTGCTCCGACGGGAA  
CCACTGCTGTCCACGGACTACACGTGTGACGTGGAGAAGACCACGTGCACCAAGGGGAAAGTGGTGATC  
CCCTGGTACACCAAGCTCCCGGCCAGCGCCAGCGTGGAGGACGATCCCGCTCTGTGCACTGCGACGGGC  
AGGAGCAATGCCCGACGACAACACCTGCTGCCAGCTGCAGTCCGGCGAGTGGGGCTGCTGCCCCATGCC  
AGACGCCGTGTGCTGCCGGATAAGGTGCACTGCTGCCCGCAGGGCTACACCTGCAACATGGCCTCCAAC  
TCTGCCAGAAGCTCCTCATGCTGCAGCTGCAAGCCGTCCTGCTGACACGGGTGTATCTGCCCGAGGGCG  
AGCCACGTCGAGTCCCTCGGAGCAGGGCGACGTGGTGTGTGATGATCAAACCAGATGTCCCGATGGACA  
GACCTGCTGCAGGACCTCGGCCACGACGTGGGGCTGCTGTCCAGCTCCCAATGCGGTGTGCTGCAGCGAC  
ATGCAGCACTGCTGCCCGAGGGCCACACCTGCACCGAGACCGGAGGCTGCACCGGGAAACAACGTCCCC  
ACTGGCACAAGTGGCAGGTGTTCTTACGCAACAAAAAGAGATCCCTAATTAAGTGAAGACCCCTCCACCCC  
CCCCGCACTGCCATTTGATTCTGCAACGTGCACTCAATGGAAATGATGTAGAAGGGATTTTATTTGTGGT  
GAAGGGGATGTGAGTGCATTGCACGATGGGTTATGATGTTCTGCAACTACCACTACACGCCACAACATC  
AGGGCATTACCTTTTAAACGACTCTTTTTAAATTCAGCCTTGGTATTCTTGTATTGAATATAACTTC  
CATCCATTAATAACAATCCACTGGCAATGTGATTCTCTTTTGTGTTCTGCTTACGTGCTTTGTACT  
GCCGGGCACTTCATCAATAATTAGTCACAATTCAGGGCAATGTTTTATCATTTTAATTATAATGATTCC  
ACCTCATGATGGGCGAGTCTGTTTAAATGCTGTTTTCTACTACTTCAGATTTGGAAGATAATGGAATAAT  
CTGTAATGAGTTATTGTTTTGATTTTGTGCAATGATGTTGTCATCCATGTTAATTTGGGATTTCAAACACA  
CAATGACGAAAAACGCAAGTACACTTGAGGCTTTATCTGCAATG

**Genomic data:**

**Note:** Genomic data (exons).

From NCBI: AANH01011296.1 GI:86291392 (reverse complement 39340-46200)

**Coding exon 1 Exon type: sn**

**Note:** from start codon.

ATGCAGATGCAGGTGGTATCTGTTTGGCTCTCGTGGCTCTCGTTGGGGCTGATGAGTGTCCGGATGGAG  
GGAGATGTGAAGACGGTACACCTGCTGCAACGACCCGGCCACGGCTACGAATGCTGCCCTCTGGATCA  
G

**Coding exon 2 Exon type: c**

GCCGAGTGTGCGGGGATCACGCGCACTGCTGTCTGCGGAACTCTGCCACGCAGCCAGTCCAGCT  
GTTTGAAACACCACGGCTCCGTCCCTGGGTGGAAAGATCCCCGCGGATCAGCCCGACTCTCCAAG

**Coding exon 3 Exon type: n\***

**Note:** encodes the N-half of a 10 Cys module.

TCCTTCAGGATGATCAAGTCGTCCGCGGGGAGGAGGACGACAACATCTGTCCCGATCTGTCCCGATGCC  
CGGCCGAGTTTTCTGCCTGAAGGCTTTGACAAAAGTTTGGCTGCTGTCCGTTAGCTCAG

**Coding exon 4 Exon type: c\***

**Note:** encodes the C-half of a 10 Cys module.

GGAGTCCCTGTTCCGATGGGAAACTGCTGTCTGAGGGCCACCAGTGCAGCGCAGACTGCCGCTCCT  
GCATCAAACAAG

**Coding exon 5 Exon type: n**

AGCTTGTGACTACAGTTCTGTGCAAGGATGGAGTGTGAGTGTCCGGATGGAACCACCTGCTGTGAAAA  
CCCAGATGGAAAGTGGGCTGCTGTCCCTGCCGAAAG

**Coding exon 6 Exon type: c**

GCCGTGTGCTGCGAGGACAAAGACGCACTGCTGCCCTGAAAGGGACCACGTGTGATGTGCGAACACAGCAAAT  
GTATTTCCCTGTTTACCAAACAGGAGTTGCCATATGTGGGCCAAAATCGCTGCCAGGTTGAGAGCGGACTG  
GGAGAACCCGAAAAG

**Coding exon 7 Exon type: j**

**Note:** j = encodes additional joining sequence between modules.

AACAAGTCACTTCAAAAACGGCCGTTGAAAGTACCACAGTACTGCAGTCAGTCCCACCGAGGAAGAACC  
GTCGCTACCAAGCCCGCTGCAGACGCGATGTTTCCCATGCATTTAG

**Coding exon 8 Exon type: n**

GCGTTAGTGTGGCTGTGATGCCACAGAAGCCTGCGCAGGTAACAGCACATGCTGTATGACCCCGGAGGG  
CGGCTGGAGCTGCTGCCACTTCCAGAG

**Coding exon 9 Exon type: c\*n**

**Note:** c\* = encodes a C-half missing the first Cys as in a 10 Cys module.

GCTGTTGACTGTGAGGATTCAGTTCACTGCTGCCCCAAAAGGGCGAAAAATGCAACCCGGCCACCCAGGCCCT  
GCGATAGCGAGGGATGCTCTGTGCCGTGGCTCCAGAAAGGTGCCCAAAATCCCCAGACTACAGGTGGGGAA  
TGTGTCAATGTGACGCCACCCACCAGTGTTCGGACGGCACCACCTGCTGCAAGACTGCAACACAGGAGTGG  
GCCTGCTGTCTCTTCCCGAG

**Coding exon 10 Exon type: cn**

GCCGTCTGCTGCGACGACCACGAGCACTGCTGCCCCGACGGCACCACCTGCGACCTGGCCTCGCTCAGCT  
GTACCGGCGCCTCGGGCTCCACGCCCATGATGCCAAAGACGCCCGGTTTCGTCACGGCGGGCCCTTTCCC  
CCAAAAGCCGGGCAACGATACCAAGGGAGAGGAGGGCAGCAAAGCGCCGGAGGAGGACGAGGTGGTTTCAG  
TGCGACTCCCGCACCAGCTGCCCTCAGTCCAACACCTGCTGCTTCATGGCCGAGTCTCAGAAGTGGGGTT  
GTTGCCCGCTGCCGAAAG

**Coding exon 11 Exon type: cn**

GCCGTTTGTGCTCCGACGGAAACCACTGCTGTCCCACGGACTACACGTGTGACGTGGAGAAGACCACGT  
GCACCAAAGGGGAAGTGGTATCCCTGGTACACCAAGTCCCGGCCAGCGCCAGCGTGGAGGACGATCC  
CGCTCTGTGACGTGCGACGGGACAGGAGCAATGCCCCGACGACAACACCTGCTGCCAGCTGCAGTCCGGC  
GAGTGGGGCTGCTGCCCATGCCAGAC

**Coding exon 12 Exon type: cn**

GCCGTGTGCTGCCCGGATAAGGTGCACTGCTGCCCCGACGGGCTACACCTGCAACATGGCCTCCAACCTCCT  
GCCAGAAAGTCTCTATGCTGCAGCTGCAAGCCGTCCCGCTGACACGGGTGTATCTGCCCGAGGCGGAGCC  
CACGTCGAGTCCCTCGGAGCAGGGCGACGTGGTGTGTGATGATCAAACCAGCTGTCCCGATGGACAGACC  
TGCTGCAGGACCTCGGCCACGACGTGGGGCTGCTGTCCAGCTCCCAAT

**Coding exon 13 Exon type: c**

GCGGTGTGTCGACGACATGCAGCACTGCTGCCCGAGGGCCACACCTGCACCGAGACCGGAGGCTGCA  
CCGGGAACAACGTCCCCACTGGCACAAGTGGCAGGTGTTCTTCAGCAACAAAAAGAGATCCCTAATTAA  
GTGA

**Genomic sequence note:** A genomic sequence is not presented (see note 2 in header).

00021 **G. aculeatus progranulin B** Short name: **G\_acuB or GaB** Date entered: 2014-03

**Species:** *Gasterosteus aculeatus (stickleback)*

**Taxonomy (via NCBI):** *Eukaryota; Metazoa; Chordata; Craniata; Vertebrata; Euteleostomi; Actinopterygii; Neopterygii; Teleostei; Euteleostei; Neoteleostei; Acanthomorpha; Acanthopterygii; Percomorpha; Gasterosteiformes; Gasterosteidae; Gasterosteus.*

**General Comment:**

**Protein Sequence**

MTLKMLPMGVMF LALLGLSCTRVCPDGGICRHQNTCCKNAVGGYGCCPLPYAECCSDHLHCCYERTVCDL  
VHSRCVNVKTVSLPMMRRVPLQETLRAIICPDQESECPNDATCCQLLDGWSGCCPLTKAVCCEDKLHCCP  
EATKCDLAHSAKCVSSSLESFPMLEKLPKRDRNHSVSVSPPGGKSSCPDSYTCCLLASGDYGCCPYSQA  
MCCSDHLHCCPSNTICDLAHGVCKDGEAIFPLLLKIAAVPNDVTCPEDETSVCPDETTCCCKMVDGSGYCCP  
MPDAVCCSDHIHCCPEGTQCDVAHSACLSARGAAALTA VAVAMPTEVQKKVSVLPCNDSVACAEGSTCCG  
LAEGGWACCPLPKAVCCEDHQHCCPHGTVCDELEASTCVDSSAGTSTPWFDFKSPAFSLPTGNSQCDKTTSC  
PGTSTCCRAVGGGWACCPLPQAVCCEDHLHCCPHDTVCNLQAETCDDPSGVLP SLRWVEKASATRAVAMP  
TLFARNMCDATQSCPRDTTCCFMDQTRKWGCCPLPKAVCC HDGDHCCPSGHTCEPHRSSCSKGPLVLPVW  
FSKLSARSEAAGNASATDVKCDNKSSCASGTTCCCKLKTEGWGCCPLVKAVCCADREHCCPQGYTCNMQTS  
TCEKTANALLPPLPQVRVVRPEPVDHEDVACDVGGEFRCPRATCCRVSASEWGCCPSPQAVCCPDSKHC  
CPAGYSCDPKAGGCSRPQLTWDGKSD FVPHGL\*

**Transcript:**

**Note:** A full cDNA transcript sequence is available.

The cDNA data define the transcript well (below), so no predicted sequence is required.

**cDNA data:**

**From:** NCBI: BT028434.1 GI:112421697

**Note:** cDNA sequence data:

CGCGTCGAATTGGACGGTTTTCCCATTTGCGGCGAACCCATCAGGTTGCAAGAGGAGAATGCAGCATAGA  
GCTGTTTCATTAATAACACCTGAACTGAAGCTGACTGCAAAGCCTCTGCTATGACGTTAAAGATGTTGCCG  
ATGGGGGTCATGTTCCCTGGCTCTGCTGGGCTGAGCTGCACCAGGGTCTGTCCGATGGAGGCATCTGCC  
GCCACCAGAACACCTGCTGCAAGAACGCCGTTGGAGGCTACGGATGCTGTCCGCTACCATATGCGGAGTG  
TTGCTCAGACCACCTGCACTGCTGCTACGAGAGGACGGTGTGTGATCTGGTCCACAGCCGATGTGTGAAT  
AAGACCGTTTCCCTTCCCATGATGAGACGCGTCCCTCAGCTTCAAGAGACGCTGAGAGCCATCATCTGTC  
CAGACCAAGAGTCCGAGTGTCCGAACGATGCCACCTGCTGCCAGCTTCTGGACGGCTCGTGGGGCTGCTG  
CCCATTAAC TAAGGCGGTGTGTTGTGAGGATAAACTCCACTGCTGCCCCGAGGCGACAAAGTGCACCTC  
GCTCATTCAAAGTGTGTTTCCCTCCTCGCTGGAGTCCCTCCCCATGCTGGAGAAGCTGCCTGCAAAGAGGA  
GGGACAATCACTCAGTCGGCTCGGTGTCGTGTCGCGGGGGCAAAGCAGCTGCCAGACAGTTATACGTG  
TTGCCCTTCTGGCCAGTGAGATTACGGCTGCTGTCTTACTCACAGGCCATGTGCTGCAGCGACCATCTC  
CACTGTTGCCCCAGCAACACGATATGTGACCTGGCCACGGGGTCTGCAAAGACGGGGAGGCGATATTT  
CGCTGCTGAAGAAGATCGCCGCTGTGCCCAATGACGTTACGTGTCCAGACGAGACGTCGTCGTGTCCAGA  
CGAGACGACGTGCTGCAAGATGGTGGACGGCTCGTACGGCTGCTGTCCGATGCCGACGCCGCTCTGTTG  
TCAGATCACATCCACTGTTGTCTGAAGGAACCCAGTGTGACGTCGCCACAGCGCATGTTTATCCGCC  
GTGGAGCGGCTGCCTAACGGCCGTCGCCGTGGCAATGCCGACGGAAGTACAGAAAAAGTCAGCGTCTCT  
TCCCTGCAACGACTCTGTTGCGTGTGCTGAGGGGAGCACCTGCTGCGGGTTGGCGGAGGGAGGATGGGCC  
TGTTGTCCACTACCAAGGCCGATGCTGCGAGGACCACCGACTGCTGTCCACACGGCACTGTTTGTG  
ACCTCGAGGCTCCACCTGCGTCGACTCCTCTGCCGGCAGTCCACGCCGTGGTTCGACAAATCGCCCGC  
CTTCTCTTACCGACCGCAACAGCCAGTGTGACAAGACCACCTCGTGTCCCGGGACGTCCACCTGCTGC  
AGGGCGGTGGGCGGGCTGGGCTGCTGTCTCTGCTCAGGCCGTGTGCTGCGAGGACCACCTCCACT  
GCTGCCCTCACGACACCGTCTGCAACCTGCAGGCCGAGACCTGCGACGACCCCTCTGGCGTCTGCGCTC  
CCTCCGCTGGGTGGAGAAAGCGAGCGCCACTCGGGCCGTTGCCATGCCGACTCTTCCGGCCAGGAACATG  
TGCGACGCCAGACCAGCTGCCCCAGAGACACAACCTGCTGCTTCATGGACCAGACACGCAATGGGGGT

GTTGCCCTTTGCCGAAGGCTGTGTGCTGCCACGACGGAGACCACTGCTGCCCCAGCGGCCACACCTGTGA  
GCCCCACCGCTCCTCCTGCTCGAAGGGACCCCTTGTCTTGTGCCCTGGTTCTCCAAGCTGAGCGCCCGC  
AGCGAGGCGGGCGGGGAACGCCTCTGCGACGGACGTCAAGTGCACAAAGAGCAGCTGCGCCTCGGGGA  
CGACGTGCTGCAAGCTGAAGACGGAGGGGTGGGGTCTGCTGCCCCTGGTGAAGGCCGTTTGTGTGCCGA  
CCGCGAGCACTGCTGTCCTCAGGGTTACACCTGCAACATGCAGACGAGCACCTGCGAGAAGACCGCCAAC  
GCCCTCCTCCCCCCTCCTCAGGTCAGAGTGGTACGGCCCAGCCGTAGACCACGAGGATGTGGCGT  
GTGACGTCGGGGGGGAGTTCCGCTGCCCCGACGGGCCACGTGCTGCAGGGTCTCTGCATCGGAGTGGGG  
TTGCTGCCCCTCCCCGAGGCCGTCTGCTGCCCTGACTCAAAGCACTGCTGCCCCGCGGCTACTCATGT  
GACCCGAAGGCCGGCGTGTCTCCGCCCCAGCTGACCTGGGACGGAAGAGTGACTTTGTCCCGCATG  
GACTTTGATCCACCTAAAGTGCACCAGTCTTTTCATCCATAACACCCACTTTAGTCTGTGTCCTCTT  
TAGTCACTTCTCTTTTTGTCTTCATATGAGGGGGGGGAGCTGATGAAACGTGGTGGCAATGAAGACAT  
GATAATGAAGTAGAAGCACTTTGACCAGGTGACATCGCTGTTTATTCTTTATTATCATGATCTCAGTTT  
CTGCAGATGATGAGTACTATGTGGGTGTTGCGTCATGGCTTTCTTCATTTTAACAAATGTAGAGACAAA  
AACATCAATGCGTTCCTTTGTATGTTGGTTCATGTATTTTTTGTAACTGTTTCAAACCGCTGGAGGAG  
CAAGTTGGACAATGAGCAAAGGAATTACTTTTTAGTGTGTTTCATTGGGTTTTATGAACAGATGAATAAG  
TTGTTAAACTGGTTACCTTCATGGTCTTAATGGACACGATGTTAAATAAAGTTGTATAATTA  
AAAAAAAAAAAAAAAAAAAA

**Genomic data:**

**Note:** Genomic data (exons).

From NCBI: AANH01006432.1 GI:86296256 (94690-102950)

**Note:** The gene is within the sequence gblAANH01006432.1l:94690-102950 *Gasterosteus aculeatus* cont1.006431, whole genome shotgun sequence

**Coding exon 1 Exon type: sn**

**Note:** from the start codon (which begins this exon)

ATGTTGCCGATGGGGTCTGTGTTCTGGCTCTGCTGGGCTGAGCTGCACCAGGGTCTGTCGGATGGAG  
GCATCTGCCGGCACCAGAACACCTGCTGCAAGAACGCCGTTGGAGGCTACGGGTGCTGTCGGCTACCATA  
T

**Coding exon 2 Exon type: c**

GCGGAGTGTGTTGCTCAGACCACCTGCACTGCTGCTACGAGAGGACGGTGTGTGATCTGGTCCACAGCCGAT  
GTGTGAATAAGACCGTTTCCCTTCCCATGATGAGACGCGTCCCTCAG

**Coding exon 3 Exon type: n**

CTTCAAGAGACGCTGAGAGCCATCATCTGTCCAGACCAAGAGTCCGAGTGTCCGAACGATGCCACCTGCT  
GCCAGCTTCTGGACGGCTCGTGGGGCTGCTGCCATTAATAAG

**Coding exon 4 Exon type: c**

GCGGTGTGTTGTGAGGATAAACTCCACTGCTGCCCCGAGGGCACAAGTGCACCTCGCTCATTCAAAGT  
GTGTTTCTCCTCGCTGGAGTCTTCCCCATGCTGGAGAAGCTGCCCTGCAAAGAGGAGGGACAATCCTC  
AG

**Coding exon 5 Exon type: n**

TCGGCTCGGTGTCGTGTCCCGGGGGCAAAAGCAGCTGCCAGACAGTTATACGTGTTGCCTTCTGGCCAG  
TGGAGATTACGGCTGCTGTCTTACTCACAG

**Coding exon 6 Exon type: c**

GCCATGTGCTGCAGCGACCATCTCCACTGTTGCCCCAGCAACACGATATGTGACCTGGCCACGGGGTCT  
GCAAAGACGGGGAGGCGATATTTCCGCTGCTGAAGAAGATCGCCGCTGTGCCAATGACG

**Coding exon 7 Exon type: n**

TTACGTGTCAGACGAGACGTCTGCTGTCCAGACGAGACGACGTGCTGCAAGATGGTGGACGGCTCGTA  
CGGCTGCTGTCCGATGCCCGAC

**Coding exon 8 Exon type: c**

GCCGTCTGTTGCTCAGATCACATCCACTGTTGTCTGAAGGAACCCAGTGTGACGTCGCCCACAGCGCAT  
GTTTATCCGCCGTGGAGCGGCTGCCTTAACGGCCGTCGCCGTGGCAATGCCGACGGAAGTACAGAAAA  
AG

**Coding exon 9 Exon type: n**

TCAGCTCCTTCCCTGCAACGACTCTGTTGCGTGTGCTGAGGGGAGCACCTGCTGCGGGTGGTGGAGGG

AGGATGGGCCTGTTGTCCACTACCCAAG

**Coding exon 10 Exon type: cn**

GCCGTATGCTGCGAGGACCACCAGCACTGCTGTCCACACGGCACTGTTTGTGACCTCGAGGCCTCCACCT  
GCGTCGACTCCTCTGCCGGCAGTCCACGCCGTGGTTTCGACAAATCGCCCGCCTTCTCTTACCGACCGG  
CAACAGCCAGTGTGACAAGACCACCTCATGTCCCGGGACGTCCACCTGCTGCAGGGCGGTGGGCGGCGGG  
TGGCCTGCTGTCTCTGCCTCAG

**Coding exon 11 Exon type: cn**

GCCGTGTGCTGCGAGGACCACCTCCACTGCTGCCCTCACGACACCGTCTGCAACCTGCAGGCCGAGACCT  
GCGACGACCCCTCGGGTGTCTTGCCGTCCCTCCCGTGGGTGGAGAAAAGCGAGCGCCACTCGGGCCGTTC  
CATGCCGACTCTTCCGGCCAGGAACATGTGCGACGCCAGACCAGCTGCCCCAGAGACACAACCTGCTGC  
TTCATGGACCAGACACGCAAAATGGGGGTGTTGCCCTTTGCCGAAAG

**Coding exon 12 Exon type: cn**

GCTGTGTGCTGCCACGACGGAGACCACTGCTGCCCCAGCGGCCACACCTGTGAGCCCCACCGCTCCTCCT  
GCTCGAAGGGACCCCTTGTCTTGTGCCCTGGTTCTCAAGCTGAGCGCCCGCAGCGAGGGCGGGGGGAA  
CGCTCCGCGACGGACGTCAAGTGCACAACAAGAGCAGCTGCGCCTCGGGGACGACGTGCTGCAAGCTG  
AAGACGGAGGGGTGGGGCTGCTGCCCGCTGGTGAAAG

**Coding exon 13 Exon type: cn**

GCCGTTTGCTGTGCCGACCGGACCACTGCTGTCTCAGGGTTACACCTGCAACATGCAGACGAGCACCT  
GCGAGAAGACCGCCGACGCCCTCTCCCCCCCCCTCCCTCAGGTCAGAGTGGTACGGCCCGAGCCCGTAGA  
CCACGAGGACGTGGCGTGTGACGTGCGGGGGGAGTTCGCTGCCCCGACGGGCCACGTGCTGCAGGGTC  
TCTGCATCGGAGTGGGGCTGCTGCCCTCCCCGACG

**Coding exon 14 Exon type: c**

**Note:** up to stop codon

GCCGTCTGCTGCCCTGACTCAAAGCACTGCTGCCCCGCCGGCTACTCATGTGACCCGAAAGGCCGGCGGTT  
GCTCCCGCCCCAGCTGACCTGGGACGGAAAAGAGTGACTTTGTCCCGCATGGACTTTGA

**Genomic sequence note:** A genomic sequence is not presented (see note 2 in header).

---

00022 **G. aculeatus progranulin C** Short name: **G\_acuC or GaC** Date entered: 2014-03

**Species:** *Gasterosteus aculeatus (stickleback)*

**Taxonomy (via NCBI):** Eukaryota; Metazoa; Chordata; Craniata; Vertebrata; Euteleostomi; Actinopterygii; Neopterygii; Teleostei; Euteleostei; Neoteleostei; Acanthomorpha; Acanthopterygii; Percomorpha; Gasterosteiformes; Gasterosteidae; Gasterosteus.

**General Comment:**

**Protein Sequence**

MLGVTLWLLGVFVFCASCAVTCPDGTTCSNLTCCMTRKGYSCCHYPNAVCCSDLAHCCPSGFRNCNTSTQM  
CERKPWTMI TPMVKKQAAEKSDTLVLPVSPLEPVKNQVADPKTSSVVHCDNYTTCPDATTCCRHPAGTW  
FCCPYSPGRCLDGFHCCPYGYDCDLTYTHCVRRLRYPFSPNKSVPSVPA SLILPSEEKSR LQETPMTA  
LTEANGVVAVDGVIRCDSSFYCAAGTTCCKAPTGRWNCCPYPLGQCCADGRHCCQYGYACDSTLSCKSG  
YSQIPSGAQEAAKTD\*

**Transcript:**

**Note:** Transcript cDNA contig from meagre EST data

The cDNA data define the transcript well (below), so no predicted sequence is required.

**cDNA data:**

**From:** NCBI est: EST contig from gi: (62076839, 85405602, 62076838, 85405603)

**Note:** The cDNA EST contig required some manual assembly.

GCGGTGAGCTGTTGAATCACTTGACCTGCAAGATGTTGGGAGTGACTCTGTGGTTGTTGGGAGTATTTGT  
GTGTGCCCTCCTGTGCCGTACATGCCCGGATGGGACCACGTGTTCTAATCTCAACACCTGCTGTATGACT  
AAACGCGGCTACAGCTGCTGTCAATTACCCAAACGCCGTGTGTTGCTCTGACTTGGCCCACTGCTGCCCTT  
CAGGGTTCCGCTGTAACACGTCTACCCAGATGTGTGAGCGAAAAGCCGTGGACGATGATTACCCCATGGT  
GAAGAAGCAGGCTGCAGAGAAAATCTGACACTCTTGTCTTACCGGTTTCTCCCCCTCGGGAGCCCGTGAAG

AACCAGGTGGCAGACCCGAAAACGAGCTCAGTTGTTCACTGTGACAACTATTACACGTGTCCTGATGCCA  
CTACTTGTGTCAGACACCCAGCGGGTACTTGGTTCTGTTGCCGTACTCTCCTGGAAGGTGTTGTCTGGA  
TGGCTTCCACTGTTGCCCTTATGGCTATGACTGTGACCTCACGTACACGCACTGTGTGAGACGAGGCCTG  
CGGTATCCTTTACAGCCCAACAAAAGTGTGCCATCAGTGCCGGCCTCTCTCATTTTGCCTTCAGAGGAAA  
AAAGCCGCTTGCAAGAGACACCCATGACTGCTCTGACAGAAGCAAATGGTGTGTCGCGCCGTGGATGGCGT  
CATTCGCTGCGATTTCATCGTTCTACTGCGCAGCAGGAACAACCTTGTGCAAAGCACCTACAGGCCGATGG  
AACTGCTGTCCCTACCCACTGGGCCAGTGTGTGACAGATGGGCGACACTGCTGTCAGTATGGTTATGCAT  
GTGACTCCACCTCCCTGTCATGTAAAAGCGGCTACTCTCAGATCCCATCAGGAGCCCAAGAAGCCGCCAA  
AACCGACTGAGGAAGTTATTTTATTTTTTCTGCACCGGGACAGCAGTCTAATGAATGATGTACTTAATA  
ACATAGATCTCATGGG

### Genomic data:

**Note:** Genomic data (exons).

From NCBI: AANH01002322.1 GI:86300366 (81340-83840)

**Note:** gb|AANH01002322.1:81340-83840 *Gasterosteus aculeatus* cont1.002321, whole genome shotgun sequence

#### Coding exon 1 Exon type: sn

**Note:** from start codon (which is at the beginning of this exon)

ATGTTGGGAGTACTCTGTGGTTGTTGGGAGTATTTGTGTGTCCTCTGTGCCGTACATGCCCGGATG  
GGACCACGTGTTCTAATCTCAACACCTGCTGTATGACTAAACGCGGCTACAGCTGCTGTCATTACCCAAA  
C

#### Coding exon 2 Exon type: cn

GCCGTGTGTTGCTCTGACTTGGCCCACTGCTGCCCTTCAGGGTTCGCTGTAACACGTCTACCCAGATGT  
GTGAGCGAAAAGCCGTGGACGATGATTACCCATGGTGAAGAAGCAGGCTGCAGAGAAAATCTGACACTCT  
TGTTCTACCGGTTTCTCCCTTCGGGAGCCCGTGAAGAACCAGGTGGCAGACCCGAAAACGAGCTCAGTT  
GTTCACTGTGACAACTATTACACGTGTCCTGATGCCACTACTTGTGACAGACCCAGCGGGTACTTGGT  
TCTGTTGCCCGTACTCTCCT

#### Coding exon 3 Exon type: c

GGAAGGTGTTGTCTGGATGGCTTCCACTGTTGCCCTTATGGCTATGACTGTGACCTCACGTACACGCACT  
GTGTGAGACGAGGCCGTGCGGTATCCTTTCAGCCCCAACAAAAGTGTGCCATCAGTGCCGGCCTCTCTCAT  
TTTGCTTCAGAGGAAAAAAGCCGCTTGCAAGAG

#### Coding exon 4 Exon type: n

ACACCCATGACTGCTCTGACAGAAGCAAATGGTGTGTCGCGCCGTGGATGGCGTCAATTCGCTGCGATTCAI  
CGTTCTACTGCGCAGCAGGAACAACCTGCTGCAAAGCACCTACAGGCCGATGGAACCTGCTGCCCTACCC  
ACTG

#### Coding exon 5 Exon type: c

**Note:** up to the stop codon.

GGCCAGTGTGTCAGATGGGCGACACTGCTGTCAGTATGGTTATGCATGTGACTCCACCTCCCTGTTCAT  
GTAAAAGCGCTACTCTCAGATCCCATCAGGAGCCCAAGAAGCCGCCAAAACCGACTGA

**Genomic sequence note:** A genomic sequence is not presented (see note 2 in header).

---

00029 **G. morhua progranulin C** Short name: **G\_morC or codC** Date entered: 2014-03

**Species:** *Gadus morhua* (Atlantic cod)

**Taxonomy (via NCBI):** Eukaryota; Metazoa; Chordata; Craniata; Vertebrata; Euteleostomi; Actinopterygii; Neopterygii; Teleostei; Euteleostei; Neoteleostei; Acanthomorpha; Paracanthopterygii; Gadiformes; Gadidae; Gadus.

**General Comment:** This cod progranulin small form sequence was included in the analysis because it displays another variety branching off from the 3 module form by loss of the third (c) coding exon and replacement with a short unrelated exon, and more recently via a mutation of the second codon of the last (c) coding exon to produce a stop codon. If this stop were suppressed, translation would continue through a nearly typical (except for an extra Cys) C-half module. This fossil C-half last exon was included in our analysis, and the translation is included in lower case below.

### Protein Sequence

MWCYSVLVLVGVAVGWSVQVSCYVVC PDGSLCANDNTCKNIFGGYGCCPFQAVCCSDMMQCCPNGWDC  
HVSTQCTKEGHPLLRLLPMRQKVIAGGPGGSLSTLPLSRLQGQRADLGQGAEGPGRQVDCGEEDDGSC

PSGTECCRGADGGWLCCPVSAQDLGEALSPRGSVHPATKAWNRI LGLRENEMEGSDGMGGVYCDVAVSYC  
PSGTSCCQGTAGHWSCCPDHMG\*ccsdgvhccdcgyacdpsnlrcrkqfadvp sgakkdarpy\*

**Transcript:**

**Note:** Well defined by 46 ESTs (e.g. gi: 295336340 gb: GW859673.1)

The cDNA data define the transcript well (below), so no predicted sequence is required.

**cDNA data:**

**From:** NCBI: Contig of GW859673.1 GI:295336340 and 45 other EST sequences.

**Note:** cDNA sequence data:

TCGGGGGAATAAATGTGATGCACCTGCACTGATAGGAAGAGATCCAACCACTGCAGGCTGAAAAGATGTG  
GTGTTACAGTGTGTTGGTCTAGTGGGCGTGGCCGTGGGGTGGAGTGCCAGGTCTCCTGCTACGTCGTC  
TGTCGGGATGGATCGCTTTGCGCAAATGACAACACCTGCTGCAAGAACATTTTCGGTGGATAACGGCTGCT  
GCCCTTTCCACAGGCGGTGTGCTGCTCCGACATGATGCAATGCTGTCCAAACGGCTGGGATTGTCACGT  
CAGCACCCAGACGTGTACGAAGGAGGGCCATCCACTGCTCCGCTTACCCATGAGGCAGAAGGTGATCGCT  
GGGGGACCGGGCGGCTCCCTCTCTACCCTTCCCTCTCACGCCCTCCAGGGGACGCGGGCTGATCTGGGTC  
AGGGAGGAGCTGAAGGCCCGGGGGTTCGGCAGGTGCGACTGCGGAGAGGAAGACGACGGCTCCTGCCCTC  
GGGCACGGAGTGTGTCAGAGGGGCGACGGTGGCTGGCTCTGCTGCCCGTCTCCGCTCAGGACCTCGGG  
GAGGCTCTCAGCCCCAGAGGGTCCGCCGTACACCCGGCCACTAAGGCATGGAACAGGATCCTCGGGCTCA  
GAGAGAACGAGATGGAAGGGTCCGATGGCATGGGAGGGGTGACTGTGATGCGGTATCCTACTGCCCATC  
GGGACCTCCTGCTGTCAGGGCACTGCACACGGCTGGAGCTGCTGCCCTGACCACATGGGCTAGTGTGT  
TCTGACGGGGTTCACTGCTGTGATTGTGGCTATGCCTGTGACCCCTCGAACCTGAGATGCAGGAAGGGAT  
TCGCTGACGTCCCTTCAGGAGCAAAGAAGGATGCTAGACCATACTGAGACACAAAAGCACATATTCTCAG  
CTTCATGTGTGACGTCTTAAATTCAAATACCAAACCATATAGGCAAAGCCTTATTCTTACATGTTCTGTG  
AGATTAATTGTTCTTATTGATAGACAATTGTTCAATAAACTGGCATTCTAAAAATCAAAAAAAAAAAAA  
AAAAAAAAAAAAAAAAAAAAAAAAAAAAA

**Genomic data:**

**Note:** Genomic data (exons).

From NCBI: CAEA01374489.1 GI:344526866

**Coding exon 1 Exon type: sn**

**Note:** from the start codon (which is also the beginning of this exon)

ATGTGGTGTACAGTGTGTTGGTCCTAGTGGGCGTGGCCGTGGGGTGGAGTGTCCAGGTCTCCTGCTACG  
TCGCTGTCCGGATGGATCGCTTTGCGCAAATGACAACACCTGCTGCAAGAACATTTTCGGTGGATACGG  
CTGCTGCCCTTTCCACAG

**Coding exon 2 Exon type: cn**

GCGGTGTGCTGCTCCGACATGATGCAATGCTGTCCAAACGGCTGGGATTGTCACGTCAGCACCCAGACGT  
GTACGAAGGAGGGCCATCCACTGCTCCGCTTACCCATGAGGCAGAAGGTGATCGCTGGGGACCGGGCGG  
CTCCCTCTCTACCCTTCCCTCTCACGCCCTCCAGGGGACGCGGGCTGATCTGGGTCAGGGAGGAGCTGAA  
GGCCCGGGGGTTCGGCAGGTGCGACTGCGGAGAGGAAGACGACGGCTCCTGCCCTCGGGCACGGAGTGT  
GCAGAGGGGCGACGGTGGCTGGCTCTGCTGCCCGTCTCCGCT

**Coding exon 3 Exon type: x**

**Note:** Normally, one would expect a c type exon here. This is a short unrelated sequence.

CAGGACCTCGGGGAGGCTCTCAGCCCCAGAGGGTCCGCCGTACACCCGGCCACTAAGGCATGGAACAGGA  
TCTCGGGCTCAGAGAG

**Coding exon 4 Exon type: n**

AACGAGATGGAAGGGTCCGATGGCATGGGAGGGGTGACTGTGATGCGGTATCCTACTGCCCATCGGGGA  
CCTCTGCTGTCAGGGCACTGCACACGGCTGGAGCTGCTGCCCTGACCACATG

**Coding exon 5 Exon type: sup c**

**Note:** Where sup c means that there is c like coding following a second codon stop mutation. The sequence is given up to the second stop codon (the normal termination).

GGCTAGTGTGTTCTGACGGGTTCACTGCTGTGATTGTGGCTATGCCTGTGACCCCTCGAACCTGAGAT  
GCAGGAAGGGATTGCTGACGTCCCTTCAGGAGCAAAGAAGGATGCTAGACCATACTGA

**Genomic sequence note:** A genomic sequence is not presented (see note 2 in header).

**Species:** *Anolis carolinensis* (green anole)

**Taxonomy (via NCBI):** Eukaryota; Metazoa; Chordata; Craniata; Vertebrata; Euteleostomi; Lepidosauria; Squamata; Iguania; Iguanidae; Polychrotinae; Anolis.

**General Comment:** Well documented genomic sequence. Little cDNA data.

**Protein Sequence**

MWAPLIVYIVFCGTAFSLRCPDGSCHDGSSTCCQRHGEDGYTCCDKPQFVGTSLRMLPDPDSVNELSNVVC  
PDGSMCPVDYSCLRTVDAAAFACCPWKEAISCADGHHCPLGSHCSAKGDACIQSEVAAPLATFSAVQCPD  
HESECPNDSTCCLMPDGSWGCCPMPEASCCSDKIHCPCPHGTSCDLAHARCFSSSTQEQLLKKFPACKRAL  
VLSLAQKNICPGKQSSCPDVATCCLLSTSQYGCCPLQNAVCCSDRLHCCPQGTTCDLLHSHKCTMTSRWSW  
PITRLSVDLQKAHDIQCDLKYSCPSGNTCCCKKASGEWACCPLEEAVCCTDNIHCCKPGYQCNLAEGTCEK  
GSR SIPWVAKTSTI STAASTDMIVQCDFQTACPDGQTCRLVSGAWGCCP IPQAVCCQDHIHCPCNGYSC  
NPSTGSCFKSGHHL PWLEKKA AISTITSEIQNVRCDVSSCADGQTCCHTATGGWSCCPLPEAVCCADSL  
HCCPSGYLCDVAHGSCVKSQVPSQRLSMTPLRRQVGEVKDDQTS CPDGTCCRLSSGQWGCCPFPRAV  
CCADHVHCCPSGFMCDPSSGVCSKSHQHTLPWAPKLP AQTQQSQDIRCNDTASCEEGQTCCKGVSGAWSCC  
QLPNAVCCEDHQHCCPSGYTCNVAAQSCEKQHKPTVLP SGLLMSQVAITTL DVSCGDQHYCHYGQTC  
KAKSGGWACCPYDKGTCCRDELHCCPPGFYCSISGFECYKKWPLRWDAGAFSPRSSQARPLL\*

**Transcript:**

**Note:** Only 2 EST sequences. One confirms the 5' end, but is anomalous, as it also has 3' end sequence and most coding region deleted. The other confirms the 3' end.

**Predicted sequence:**

**Note:** Our original manual prediction from genomic data differs from XM\_003222517.1, but is supported now by Transcriptome Shotgun Assembly data: e.g. GAFZ01049906.1.

**Derivation:** Prediction from sequence found in NC\_014781 GI:315422580 bases 64130898-64155855

atgtgggcaccattgatagtgatatagtgttctgtgggacggcgtttctctacggtgcccagatggaa  
gtcactgtgatggatcatccacttgttgccaacgccacggagaggatgggtacacctgctgtgacaaaacc  
tcagtttgtggggacctccctgcgcatgttgccccagacagtgatgaatgagctctccaacggttgtgtgt  
cccgatggcagcatgtgtcctgtggactactcctgtttgctgacggtagatgctgacctttgacctgctgtc  
cctggaaaagaggccatttctgtgctgatggacaccattgttgccccctgggctcccactgcatgtgcgaa  
gggagatgcctgtatacagagtgaaagtggcagctcctctggccacggttcagtgtgtccagtgccagac  
catgagtggagtgcccaaatgatccacgtgttgacctgatgcctgacggatcgtggggctgctgccc  
tgccagaggcttctgtgttctgacaagatccactgctgtcctcatggcacaagtgtgatctggctca  
tgcgcggtgcttctcatccactcaggagcagcctcttttgaagaagtcccagccaagaaacgagctctg  
gtgttaagtctggctcagaaaaatctgtccagggaacagctctagctgtcctgacgttgccacctgtt  
gccttctctcgaccagccaatattggctgttgccctttacagaacgctgtgtgctgcagcgaccgtcttca  
ctgctgtccacaaggcaccacctgtgacctgctgcattcgaaatgcacaatgacctctcgctggctcatgg  
cccatcaccggtctctcggtggacctccaaaaagctcatgatattcagtgatgattaaagtacagttgcc  
catctgggaacacttgtgcaagaaagcctcaggggaatggcgctgctgccccctggaagaggctgtatg  
ctgacagacaatataccactgctgccc aaagggtaccaatgcaatctggcagaaggcacctgtgagaaa  
ggaagcagaagtataccatgggtggcaagacaagcacaatatactacagcagcctctactgatgatgatcg  
tgcaatgtgatttccagacagcctgcccagatggccaaacttgttgccgctagtatcaggcgcctgggg  
ctgctgtccaataccacaggctgtgtgtgtcaagatcacatccattgctgtccaatggctactcatgt  
aatccatcgactggctcttgtctcaagagtggacaccatctcccttggctggagaagaaagctgtatct  
caaccatcacctctgagatccagaatgtccggtgtgatgatgtgtcaagttgtgaggatgggagacatg  
ctgcccactgcaacagggtggctggagctgttgccctctgcccagaggcagctgtgctgcgctgactctttg  
cattgctgccccagtggtacttgtgtgatgttgacatggctcctgctgcaaaagccaggtcccctccc  
agcgctctccatgactcctgttctgagaaggcaggttggagaagtgaaatgtgacgaccaaaccagctg  
cccagatggacagacatgttgccggcttctcctgggccaatggggttgtgtgcttctcccacgggctgtc  
tgtgtgagacacatgtgcatgtgctgccccagtggttcatgtgtgatccatcctcaggcgtctgctcga  
agtctcagcacactctgcccctgggacccaagcttccagcccagacgcagcaaaagccaagacatccggtg  
caacgatactgccagctgcaagaaggcagacctgctgcaagggtgtgtcaggggcttggagctgctgc  
caactaccaatgctgttctgtgtgaggatcaccaacactgttgcccctctggctacacctgcaatgttg  
cagctcagagttgtgagaaacagcacaagcccagcttctgacctcaggggacctgctgatgtcttccc  
agttgccatcaccactttggatgtgtctgtgtgtgaccaacactactgtcattatggacagacctgctgc  
aaggccaagt caggcgggtgggcttgttgcccctacgacaagggaacctgctgcccgtgacgaaactccatt



gctgtccacctggtttctattgctccatttcaggatttgaatggttacaagaaatggcccctccgttggga  
cgctggtgcttctcccctcgctcttcccaagcgcgccattgctttga

**cDNA data:**

**From:** NCBI: FG711007

**Note:** Anomalous cDNA sequence. Confirms start and first splice in coding region, but then skips out of frame to the last 5 codons of the last coding exon.

GGCACAGCTACAGTGGGAAAGCCTGGTTTTATATCCAAGATGTGGGCACCATTGATAGTGTATATAGTGT  
TCTGTGGGACGGCGTTTTCTCTACGGTGCCAGATGGAAGTCACTGTGATGGATCATCCACTTGTGGCA  
ACGCCACGGAGAGGATGGGTACACCTGCTGTGACAAAACCTCAGTTTGTGGGGACCTCCCTGCGCATGTTG  
CCCCCAGACAGTGTGAATGAGCTCTCCATGACTCCCAAGCGCGCCATTGCTTTGAAGTGCTTTTTGGG  
TGGACTTGGCCCATGTTTGGGGGTAGAGTGCTTCTTTTCAGGGAGGGGTTTTCTGGCCAGAGGGAGT  
CCTGGTTTTTTTATACTTGTGGCTCAGGGGTGGAAAGAGGCTTCTCCTTTCTCCTGCTTTCCGGTATTG  
CCTGAATAACAAGCCACACTCCTGTGGACAGTTCCTCCTTTTCTTGGCTTCTGGCATTTCGTGTTTCACT  
TCCAAGCCAGAAATCATCTGGCCGCTCCTCCAATCTTGAAAGAGTTGTCATGTTTCTTTCTCTTTGG  
AAGATTTATGGGGTTTAGTGTCTTTTAAAAAAATTTGCCATTGCTCTTCCAATATTTTTTAAAGTTTTGT  
TTTACTTTTCATGCACTTTCTGAAAAATAATAATCTGCACACTGGATTAGCAGCTGCCATTTTTCTGCCAT  
GCTGAGCGTGAAGTTCCACATATCGTGTGCAAGGCTTTTGTGGAGAGAAAGCCAACCTTTGTCTT  
TTTTTGTATAACACAGAGTTTTTGGGAAAGAACAGGGGTCCATTGC

**From:** NCBI: FG675846

**Note:** cDNA sequence has some errors, but confirms last 3 coding exons.

GTGCAGACCATGTGCATTGCTGCCCCAGTGGCTTCATGTGTGATCCATCCTCAGGCGTCTGCTCGAAGTC  
TCAGCATACTCTGCCCTGGGCACCCAAGCTTCCAGCCAGACGCGAGCAAAGCCAAGATATCCGTTGCGAC  
GATACTGCCGGCTGCGAAGAAGGGCAGACCTGCTGCAAGGGTGTGTCAGGGGCTTGGAGCTGTGCCAAC  
TACCCAATGCTGTTTGTGTGAGGATCACCAACACAGTTGCCCTCTGGCTACACCTGCAATGTTGCAGC  
TCAGAGTTGTGAGAAATAGCACAAAGCCACAGTTCTGCCCTCAGGGGACCTGCTGATGTCTTCCCAAGTT  
GCCATCACCACTTTGGATGTGTCTTGTGGTGACCAACACTACTGTCAATTATGGACAGACCTGCTGCAAGG  
CCAAGTCAGGCGGGTGGGCTTGTGGCCCTACGACAAGGGAACCTGCTGCCGTGACGAACTCCATTGCTG  
TCCACCTGGTTTTCTATTGCTCCATTTCCGGGATTTGAATGTTACAAGAAATGGCCCTCCGTTGGGACGCT  
GGTGCTTCTCCTCTCGCTCTTCCCAAGCGCGCCCATTTGCTTTGAAGTGCTTTTTGGGTGGACTTGGCC  
CATGTTTGGGGCTAGAGTGTCTTTTCAGGGAGGGGCTTTTCTGGCCAGAGGGAGTCTGGTTTTTTTT  
ATACTTGTTCCTTAGGGGTGGAAAGAGGCTTCTCCTTTCTCCTGCTTTCAGGTATTGCCTGAATACAGC  
CCACACTCCTGT

**Genomic data:**

**Note:** Genomic data (exons). Originally deduced from the now obsolete AAWZ01020356. Currently (Feb. 2014) represented in NC\_014781 GI:315422580: 64130898-64155855, and as TSA GAFZ01049906.1 GI:463412945

From NCBI: NC\_014781 GI:315422580: 64130898-64155855

**Coding exon 1 Exon type: sn**

**Note:** from start codon

ATGTGGGCACCATTGATAGTGTATATAGTGTCTGTGGGACGGCGTTTTCTCTACGGTGCCAGATGGAA  
GTCACGTGATGGATCATCCACTTGTGCCAACGCCACGGAGAGGATGGGTACACCTGCTGTGACAAACC  
TCAG

**Coding exon 2 Exon type: n\***

**Note:** \* Encodes the N-half of a 10 cys module

TTTGTGGGGACCTCCCTGCGCATGTTGCCCCAGACAGTGTGAATGAGCTCTCCAACGTTGTGTGCCG  
ATGGCAGCATGTGTCCTGTGGACTACTCCTGTTTGGGTACGGTAGATGCTGCCTTTGCTGCTGTCCCTG  
GAAAGAG

**Coding exon 3 Exon type: c\***

**Note:** \* Encodes the C-half of a 10 cys module

GCCATTTCTGTGCTGATGGACACCATTGTTGCCCTTGGGCTCCCACTGCAGTGCGAAGGGAGATGCCT  
GTATACAGAGTGAAG

**Coding exon 4 Exon type: n**

TGGCAGCTCCTCTGGCCACGTTTCAAGTGTGTCCAGTGCCAGACCATGAGTCGGAGTGCCCAAATGATTC  
CACGTGTTGCCTGATGCCTGACGGATCGTGGGGCTGTGCCCAATGCCAGAG

**Coding exon 5 Exon type: c**

GCTTCCTGCTGTTCTGACAAGATCCACTGCTGTCCCTCATGGCACAAGTTGTGATCTGGCTCATGCGCGGT  
GCTTCTCATCCACTCAGGAGCAGCCTCTTTTGAAGAAGTTCCAGCCAAGAAACGAGCTCTGGTGTAA

**Coding exon 6 Exon type: n**

GCTGGCTCAGAAAAATATCTGTCCAGGGAAACAGTCTAGCTGTCCCTGACGTTGCCACCTGTTGCCTTCT  
CTCGACCAGCCAATATGGCTGTTGCCCTTTACAGAAC

**Coding exon 6 Exon type: c**

GCTGTGTGCTGCAGCGACCGTCTTCACTGCTGTCCACAAGGCACCACCTGTGACCTGCTGCATTTCGAAAT  
GCACAATGACCTCTCGCTGGTTCATGGCCCATCACCCGCTCTCGGTGGACCTCCAAAAAG

**Coding exon 7 Exon type: n**

CTCATGATATTCAGTGTGATTTAAAAGTACAGTTGCCCATCTGGGAACACTTGCTGCAAGAAAGCCTCAGG  
GGAATGGGCGTGTGCCCTTGGAAAGAG

**Coding exon 8 Exon type: cn**

GCTGTATGCTGCACAGACAATATCCACTGCTGCCCAAAGGGTACCAATGCAATCTGGCAGAAGGCACCT  
GTGAGAAAGGAAGCAGAAGTATCCCATGGGTGGCAAAGACAAGCACAATATCTACAGCAGCCTCTACTGA  
TATGATCGTGCAATGTGATTTCCAGACAGCCTGCCAGATGGCCAAACTTGTGCCGCTAGTATCAGGC  
GCCTGGGGCTGCTGTCCAATACCACAG

**Coding exon 9 Exon type: cn**

GCTGTGTGTTGTCAAGATCACATCCATTGCTGTCCCAATGGCTACTCATGTAATCCATCGACTGGCTCTT  
GCTTCAAGAGTGGACACCATCTCCCTTGGCTGGAGAAAGAAAGCTGCTATCTCAACCATCACCTCTGAGAT  
CCAGAATGTCCGGTGTGATGATGTGTCAGTTGTGCGGATGGGCAGACATGCTGCCACACTGCAACAGGT  
GGCTGGAGCTGTTGCCCTCTGCCAGAG

**Coding exon 10 Exon type: cn**

GCAGTCTGCTGCGCTGACTCTTTGCATTGCTGCCCCAGTGGGTACTTGTGTGATGTTGCACATGGCTCCT  
GCGTCAAAAAGCCAGGTCCCCTCCAGCGCCTCTCCATGACTCCTGTTCTGAGAAGGCAGGTTGGAGAAGT  
GAAATGTGACGACCAAACCAGCTGCCAGATGGACAGACATGTTGCCGGCTTTCTCGGGCCAATGGGGT  
TGCTGTCCTTTCCACGG

**Coding exon 11 Exon type: cn**

GCTGTCTGTTGTGAGACCATGTGCATTGCTGCCCCAGTGGCTTCATGTGTGATCCATCCTCAGGCGTCT  
GCTCGAAGTCTCAGCACACTCTGCCCTGGGCACCCAAGCTTCCAGCCAGACGAGCAAAGCCAAGACAT  
CCGTTGCAACGATACTGCCAGCTGCGAAGAAGGGCAGACCTGCTGCAAGGGTGTGTCAGGGGCTTGGAGC  
TGCTGCCAACTACCCAAT

**Coding exon 12 Exon type: cn**

GCTGTTTGTGTGAGGATCACCAACACTGTTGCCCTCTGGCTACACCTGCAATGTTGCAGCTCAGAGTT  
GTGAGAAAACAGCACAAGCCACAGTTCTGCCTTCAGGGGACCTGCTGATGTCTTCCCAAGTTGCCATCAC  
CACTTTGGATGTGTCTTGTGGTGACCAACACTACTGTCAATTATGGACAGACCTGCTGCAAGGCCAAGTCA  
GGCGGGTGGGCTTGTGGCCCTACGACAAG

**Coding exon 13 Exon type: c**

**Note:** up to stop codon

GGAACCTGCTGCCGTGACGAACTCCATTGCTGTCCACCTGGTTTCTATTGCTCCATTTCAGGATTTGAAT  
GTTACAAGAAAATGGCCCTCCGTTGGGACGCTGGTGCCTTCTCCCTCGCTCTTCCCAAGCGCGCCCAT  
GCTTTGA

**Genomic sequence note:** A genomic sequence is not presented (see note 2 in header).

---

00001 **Human progranulin** Short name: **H\_sap or human** Date entered: 2014-03

**Species:** *Homo sapiens (human)*

**Taxonomy (via NCBI):** *Eukaryota; Metazoa; Chordata; Craniata; Vertebrata; Euteleostomi; Mammalia; Eutheria; Euarchontoglires; Primates; Haplorrhini; Catarrhini; Hominidae; Homo*

**General Comment:** Well documented transcript and genomic sequences

## Protein Sequence

MWTLVSWVALTAGLVAGTRCPDQFCPVACCLDPGGASYSCCRPLLDKWPTTLSRHLGGPCQVDAHCSAG  
HSCIFTVSGTSSCCPFPEAVACGDGHHCCPRGFHCSADGRSCFQSRGNNVSGAIQCPDSQFECPDFSTCC  
VMVDGSWGCCPMPQASCCEDRVHCCPHGAFCDLVHTRCITPTGTHPLAKKLPQRTNRAVALSSSVMCPD  
ARSRCPDGSTCCELPSTGKYGCCPMPNATCCSDHLHCCPQDTVCDLIQSKCLSKENATDILLTKLPAHTVG  
DVKCDMEVSCPDPGYTCCRLQSGAWGCCPFTQAVCCEDHIHCCPAGFTCDTQKGTCEQGPVQVPMKAP  
HLSLPDPQALKRDVPCDNVSSCPSSDTCCQLTSGEWGCCPIPEAVCCSDHQHCCPQGYTCAVEGQCQRGS  
EIVAGLEKMPARRASLSHPRDIGCDQHTSCPVGQTCPSLGGSWACCQLPHAVCCEDRQHCCPAGYTCNV  
KARSCEKEVSAQPATFLARSPHVGVKDVCEGEGHFCHDNQTCRDRNRQGWACCPYRQGVCCADRRHCCP  
AGFRCAARGTKCLRREAPRWDAPLRDPALRQLL\*

## Transcript:

The cDNA data define the transcript well (below), so no predicted sequence is required.

## cDNA data:

**From:** NCBI: NM\_002087

**Note:** cDNA sequence data:

GGCGAGAGGAAGCAGGGAGGAGAGTGATTGAGTAGAAAAGAAACACAGCATTCCAGGCTGGCCCCACCT  
CTATATTGATAAGTAGCCAATGGGAGCGGGTAGCCCTGATCCCTGGCCAATGGAAACTGAGGTAGGCGGG  
TCATCGCGCTGGGGTCTGTAGTCTGAGCGCTACCCGGTTGCTGCTGCCAAGGACCGCGGAGTCGGACGC  
AGGCAGACCAGTGGACCCTGGTGAGCTGGGTGGCCTTAACAGCAGGGCTGGTGGCTGGAACCGGTGCC  
CAGATGGTCAGTTCTGCCCTGTGGCCTGTGCCTGGACCCCGAGGAGCCAGCTACAGCTGCTGCCGTCC  
CCTTCTGGACAAAATGGCCACAACACTGAGCAGGCATCTGGGTGGCCCTGCCAGGTTGATGCCACTGC  
TCTGCCGGCCACTCCTGCATCTTTACCGTCTCAGGGACTTCCAGTTGCTGCCCTTCCCAGAGGCCCTGG  
CATGCCGGGATGGCCATCACTGCTGCCACGGGGCTTCCACTGCAGTGCAGACGGGCGATCCTGCTTCCA  
AAGATCAGGTAACAACTCCGTGGGTGCCATCCAGTGCCTGATAGTCAAGTTCGAATGCCCGGACTTCTCC  
ACGTGCTGTGTTATGGTCGATGGCTCCTGGGGGTGCTGCCCATGCCCAAGGCTTCCCTGCTGTGAAGACA  
GGGTGCACTGCTGTCCGCACGGTGCCCTTCTGCGACCTGGTTACACCCCGTGCATCACACCCACGGGCAC  
CCACCCCTGGCAAAGAAGCTCCCTGCCAGAGGACTAACAGGGCAGTGGCCTTGTCCAGCTCGGTCAATG  
TGTCCGGACGCACGGTCCCCTGCTGATGGTTTACCTGCTGTGAGCTGCCAGTGGGAAGTATGGCT  
GCTGCCCAATGCCAACGCCACCTGCTGCTCCGATCACTGCAGTGCAGTGCAGTGCAGTGCAGTGCAGTGCAG  
CCTGATCCAGAGTAAGTGCCTTCCAAAGGAGAACGCTACCACGGACCTCCTCACTAAGCTGCCTGCGCAC  
ACAGTGGGGGATGTGAAATGTGACATGGAGGTGAGCTGCCAGATGGCTATACCTGCTGCCGTCTACAGT  
CGGGGGCCTGGGGCTGTGCCCTTTTACCCAGGCTGTGTGCTGTGAGGACCACATACACTGCTGTCCC  
GGGTTTACGTGTGACACGCAGAAGGGTACCTGTGAACAGGGGGCCCCACCAGGTGCCCTGGATGGAGAAG  
GCCCCAGCTCACCTCAGCTGCCAGACCCACAAGCCTTGAAGAGAGATGTCCCCTGTGATAATGTCAGCA  
GCTGTCCCTCCTCCGATACCTGCTGCCAACTCAGTCTGGGGAGTGGGGCTGTGTCCAATCCAGAGGC  
TGTCTGCTGCTCGGACCACCAGCACTGCTGCCCCAGGGCTACACGTGTGTAGCTGAGGGGCGAGTGTGAG  
CGAGGAAGCGAGATCGTGGCTGGACTGGAGAAGATGCCTGCCCGCCGGGCTTCCCTATCCCACCCAGAG  
ACATCGGCTGTGACCAGCACACCAGCTGCCCGGTGGGGCAGACCTGCTGCCCGAGCCTGGGTGGGAGCTG  
GGCCTGTGCCAGTTGCCCATGCTGTGTGCTGCGAGGATGCCAGCACTGCTGCCCGGCTGGCTACACC  
TGCAACGTGAAGGCTCGATCCTGCGAGAAGGAAGTGGTCTCTGCCAGCCTGCCACCTTCCCTGGCCCCGTA  
GCCCTCAGTGGGTGTGAAGGACGTGGAGTGTGGGGAAAGGACACTTCTGCCATGATAACCAGACCTGCTG  
CCGAGACAACCGACAGGGCTGGGCTGCTGTCCCTACCGCCAGGGCGTCTGTTGTGTGATCGGCGCCAC  
TGCTGTCCCTGCTGGCTTCCGCTGCGCAGCCAGGGGTACCAAGTGTGTTGCGCAGGGAGGCCCCCGCTGGG  
ACGCCCTTTGAGGGACCCAGCCTTGAGACAGCTGCTGTGAGGGACAGTACTGAAGACTCTGCAGCCCTC  
GGGACCCACTCGGAGGGTGGCTTCTGCTCAGGCCTCCCTAGCACCTCCCCCTAACCAAATTTCTCCCTGG  
ACCCATTCTGAGCTCCCCATACCATGGGAGTGGGGCCTCAATCTAAGGCCTTCCCTGTGAGAAGGGG  
GTTGTGGCAAAAGCCACATTACAAGCTGCCATCCCCCTCCCCGTTTCAAGTGGACCTGTGGCCAGGTGCTT  
TCCCCTATCCACAGGGGTGTTTGTGTGTGTGCGCGTGTGCGTTTCAATAAAGTTTGTACACTTTCAAAAA  
AAAAAAAAAAAAA

## Genomic data:

**Note:** Genomic data (exons).

From NCBI: NG\_007886

**Coding exon 1 Exon type: sn**

**Note:** from start codon

ATGTGGACCCTGGTGAGCTGGGTGGCCTTAACAGCAGGGCTGGTGGCTGGAACCGCGGTGCCAGATGGTC  
AGTTCTGCCCTGTGGCTGCTGCCTGGACCCCGAGGAGCCAGCTACAGCTGCTGCCGTCCCCTTCTG

**Coding exon 2 Exon type: n\***

**Note:** \* Encodes the N-half of a 10 cys module

GACAAATGGCCACAACACTGAGCAGGCATCTGGGTGGCCCTGCCAGGTTGATGCCACTGCTCTGCCG  
GCCACTCCTGCATCTTTACCGTCTCAGGGACTTCCAGTTGCTGCCCTTCCCAGAG

**Coding exon 3 Exon type: c\***

**Note:** \* Encodes the C-half of a 10 cys module

GCCGTGGCATGCGGGGATGGCCATCACTGCTGCCACGGGGCTTCCACTGCAGTGCAGACGGGCGATCCT  
GCTTCCAAAGATCAG

**Coding exon 4 Exon type: n**

GTAACAACCTCCGTGGGTGCCATCCAGTGCCCTGATAGTCAGTTCGAATGCCCGGACTTCTCCACGTGCTG  
TGTTATGGTCGATGGCTCCTGGGGGTGCTGCCCCATGCCCCAG

**Coding exon 5 Exon type: c**

GCTTCTGCTGTGAAGACAGGGTGCCTGCTGTCCGCACGGTGCCTTCTGCGACCTGGTTCACACCCGCT  
GCATCACACCCACGGGCACCCACCCCTGGCAAAGAAGCTCCCTGCCAGAGGACTAACAGGGCAG

**Coding exon 6 Exon type: n**

TGGCCTTGTCAGCTCGGTCATGTGTCCGGACGCACGGTCCCGGTGCCCTGATGGTTCTACCTGCTGTGA  
GCTGCCAGTGGGAAGTATGGCTGCTGCCAATGCCCAAC

**Coding exon 7 Exon type: c**

GCCACCTGCTGCTCCGATCACCTGCACTGCTGCCCCCAAGACACTGTGTGTGACCTGATCCAGAGTAAGT  
GCCTCTCCAAGGAGAACGCTACCACGGACCTCCTCACTAAGCTGCCTGCGCACACAG

**Coding exon 8 Exon type: n**

TGGGGATGTGAAATGTGACATGGAGGTGAGCTGCCAGATGGCTATACCTGCTGCCGTCTACAGTCGGG  
GGCCTGGGGCTGCTGCCCTTTTACCCAG

**Coding exon 9 Exon type: cn**

GCTGTGTGCTGTGAGGACCACATACACTGCTGTCCCGCGGGTTTACGTGTGACACGCAGAAGGGTACCT  
GTGAACAGGGGCCCCACCAGGTGCCCTGGATGGAGAAGGCCCCAGCTCACCTCAGCCTGCCAGACCCACA  
AGCCTTGAAGAGAGATGTCCTTGTGATAATGTGACGAGCTGTCCCTCCTCCGATACCTGTGCCAACTC  
ACGTCTGGGGAGTGGGGCTGCTGTCCAATCCCAGAG

**Coding exon 10 Exon type: cn**

GCTGTCTGCTGCTCGGACCACCAGCACTGCTGCCCCAGGGCTACACGTGTGTAGCTGAGGGGCAGTGTC  
AGCGAGGAAGCGAGATCGTGGCTGGACTGGAGAAGATGCCTGCCCGCCGGGCTTCCCTTATCCCACCCAG  
AGACATCGGCTGTGACCAGCACACCAGCTGCCCGGTGGGGCAGACCTGCTGCCCGAGCCTGGGTGGGAGC  
TGGCCTGCTGCCAGTTGCCCCAT

**Coding exon 11 Exon type: cn**

GCTGTGTGCTGCGAGGATCGCCAGCACTGCTGCCCGGCTGGCTACACCTGCAACGTGAAGGCTCGATCCT  
GCGAGAAGGAAGTGGTCTCTGCCAGCCTGCCACCTTCTGGCCGTAGCCCTCACGTGGGTGTGAAGGA  
CGTGGAGTGTGGGGAAGGACACTTCTGCCATGATAACCAGACCTGCTGCCGAGACAACCGACAGGGCTGG  
GCCTGCTGTCCCTACCGCCAG

**Coding exon 12 Exon type: c**

**Note:** to stop codon

GGCGTCTGTTGTGCTGATCGGCGCCACTGCTGTCTGCTGGCTTCCGCTGCGCAGCCAGGGGTACCAAGT  
GTTTGGCAGGGAGGCCCGCGCTGGGACGCCCTTTGAGGGACCCAGCCTTGAGACAGCTGCTGTGA

**Genomic sequence note:** A genomic sequence is not presented (see note 2 in header).

---

00027 **L. chalumnae progranulin A** Short name: **L\_chaA** Date entered: 2014-03

**Species:** *Latimeria chalumnae* (Coelacanth)

**Taxonomy (via NCBI):** Eukaryota; Metazoa; Chordata; Craniata; Vertebrata; Euteleostomi; Coelacanthiformes; Coelacanthidae; Latimeria.

**General Comment:** No cDNA sequences (as of 2014/02). Our prediction differs from XM\_005992229.1

GI:556965436. The prediction comes from 4 genomic contigs.

### Protein Sequence

MAVCGTLYKFSVLCLWLGLVLTALKCPGGLVCDNEDHCCELPGGGYECCPQSKEHMRSFPMVQSGMLNEVT  
ENLCLDHTSCPLEYSCMRTPAGSYGCCPVEEAVSCRDNHCCPKGFLCSADGKSCIKRLDDLNLGAIICP  
DETSECPDESTCCQLPSGQWGCCPFSAVCCSDKLHCCPHGTS CDVAHSQCLKGLSKTPMWSSFPATKRA  
HDVKYNATSSCPHLFTSCKGESGEETCCPLSKAVCCEDHHTCCPEGTTCDVKEGKQHKVLAIPWFTKRP  
AGPVKKSLLTTEEKSGERDVKCNDTVACPDGSTCCKVQSGDWACCPLAKAVCCEDHIHCCPEGTTCDVKEG  
KCQHKVLAIPWFTKRPAGPVKKSLLTTEEKSGERDVKCNDTVACPDGSTCCKVQSGDWACCPLAKAVCCED  
HTHCCPEGTTCDVKEGKQHKVLAIPWFTKRPAGPVKKSLLTTEEKSGERDVKCNDTVACPDGNTCCKMQS  
GDWGCCPAPNAVCCEDHIHCCPEGTTCDAKGEACNQNILVVPWLTKRPATPVKKSRTTEEKSMERDVKCN  
DTVACPDGNTCCKMQSGNWGCCPIAEAVCCADHIHCCPQGYTCETETCEKGLSFPWMQKEPAITNKLPE  
EESAPSVMCDDQTECPVGNTCCKYSTGEWGCCPLSQAVCCSDHKHCCPTDYTCDLLHSTCSKGKIAIPWV  
SKTVARKMIRTS TDPLTVVTCDSHTRCPDRNTCCKLLTGKWACCPLPNAVCCEDHHTCCPQGYQCNVQAQ  
TCESQDGVLFPNWIKAPVHTFSTSEKNAGNDVKCDSKKS CAPHNTCCKKASGGWGCCLYEEAVCCEDQS  
HCCPKGYTCEVSAGLCLKKDGFYWDGLLSNRKRFSFSTL\*

### Transcript:

**Note:** No cDNA data at this time

### Predicted sequence:

**Note:** Our prediction differs somewhat from XM\_005992229.1.

**Derivation:** Predicted from BAH001286349.1 GI:405617871, BAH001286353.1 GI: 405617867, AFYH01038604.1  
GI: 346176232, and BAH001286354.1 GI: 405617866.

ATGGCAGTGTGTGGGACTTTGTACAAGTTTTTCAGTGTCTATGTCTTTGGCTGGGTCTGGTAACAGCACTGA  
AATGTCTCTGGTGGATTGGTTTTGTGACAATGAAGATCACTGCTGTGAGCTTCCAGGAGGAGGGTATGAGTG  
TTGCCCTCAGTCAAAGGAGCATATGAGGCTTTTCCCGATGGTCCAGTCTGGAATGTTGAATGAAGTTACA  
GAGAACTTGTGTCTAGATCACACTTCATGCCCTCTGGAGTACTCTGTATGCGTACACCTGCAGGGTCTCT  
ATGGCTGCTGTCTGTAGAGGAGGCTGTATCCTGTCTGTGATGGAAATCACTGTTGTCTAAAAGGTTTTTCT  
TTGCAGTGCAGATGGGAAATCCTGTATAAAAACGCTTAGATGACTTGAACCTGGGTGCAATTATTTGTCCA  
GATGAAACTTCTGAGTGTCTGTAGTGTACCTGCTGCCAGCTACCAAGTGGACAGTGGGGGTGTTGCC  
CCTTCTCGCAGGCTGTGTGTTGTTTCAGATAAAATGCAATTGCTGCCCTCATGGAACATCTTGTGATGTAGC  
TCACTCTCAGTGTTTAAAAGGACTCTCAAAGACACCTATGTGGAGCAGTTTTCCAGCAACCAAGAGAGCC  
CATGATGTGAAATACAATGCCACGAGCAGCTGTCCCATCTCTTTACAAGCTGTAAAAGGGGAGTCTGGAG  
AAGAGACTTGCTGTCTCTATCAAAGGCTGTGTGCTGTGAAGATCATACCCACTGCTGCCCAGAGGGGAC  
CACTTGTGATGTAAAAGGAAGGGAAGTGTGTCAGCACAAAAGTCTGGCTATCCCCTGGTTCACTAAGAGACCA  
GCTGGACCAGTGAAGAAGTCTCTGACTACAGAAGAGAAAGAGCGGGGAAAAGAGACGTGAAATGTAATGATA  
CAGTTGCTTGTCTGTGATGGGAGCACCTGTTGTAAGGTGCAGTCTGGAGACTGGGCCTGCTGCCCCCTGGC  
TAAAGCTGTGTGCTGTGAAGATCATATCCACTGCTGTCCAGAGGGGACCACTTGTGATGTAAAAGGAAGGA  
AAGTGTGTCAGCACAAAAGTCTGGCTATCCCCTGGTTCACTAAGAGACCAGCTGGACCAGTGAAGAAGTCTC  
TGACTACAGAAGAGAAAGAGCGGGGAAAAGAGACGTGAAATGTAATGATACAGTTGCTTGTCTGTGATGGGAG  
CACCTGTTGTAAGGTGCAGTCTGGAGACTGGGCCTGCTGCCCCCTGGCTAAAAGCTGTGTGCTGTGAAGAT  
CATACCCACTGCTGTCCAGAGGGGACCACTTGTGATGTAAAAGGAAGGAAAGTGTGTCAGCACAAAAGTCTGG  
CTATCCCCTGGTTCACTAAGAGACCAGCTGGACCAGTGAAGAAGTCTCTGACTACAGAAGAGAAAGAGCGG  
GGAAAAGAGACGTGAAATGTAATGATACAGTTGCTTGTCTGTGATGGGAACACTTGTGTTAAGATGCAGTCT  
GGGACTGGGGCTGCTGTCTGCGCCTAATGCTGTGTGCTGTGAAGATCATATCCACTGCTGTCCAGAGG  
GGACCACTTGTGATGCAAAGGGGAGAAGCATGTAACCAGAATATCTTGGTTGTCCCCTGGCTCACTAAGAG  
ACCAGCCACACCTGTGAAGAAGTCTCGGACTACAGAAGAGAAAGAGCATGGAAAAGAGATGTGAAATGTAAT  
GATACAGTTGCTTGTCTGTGATGGGAACACCTGTTGTAAGATGCAGTCTGGGAACTGGGGCTGCTGCCCA  
TCGCTGAAGCAGTGTGCTGTGCTGATCATATCCACTGCTGTCCACAAGGTTATACATGTGAAAACCGAAAAC  
ATGTGAGAAGGGGAAAGCTATCTTTCCCTTGGATGCAGAAGGAGCCAGCTATTACTAACAAGCTACCTGAA  
GAAGAAAAGTGTCTCCAGTGAATGTGTGATGATCAAAACAGAATGCCCTGTTGGAAATACTTGTGTAAAAT  
ATAGCACTGGAGAGTGGGGATGCTGCCCTCTATCTCAGGCTGTTTGTGTCAGTACCACAAGCATTGTTG  
CCCAACTGATTATACTTGTGACCTTTTGCATAGCACATGCTCAAAGGGAAAAGATAGCCATTCCCTGGGTC  
AGTAAAGACCGTGGCGAGAAAAATGATCAGGACTTCTACAGATCCTCTCACTGTTGTGACGTGTGATTCTC  
ATACTAGGTGCCCTGATAGAAAACACATGCTGTAAGCTTCTCACAGGAAAATGGGCTTGTGTCTCTTCC  
AAATGCTGTATGTTGTGAAGATCACACACATTGTTGTCTCAGGGATAACCAGTGAATGTTTCAGGCTCAG  
ACTTGTGAGTGCAGGATGGGGTACTCTTTCCCTGGAAACATAACAGAAAGCTCCTGTTACACTTTCTCCA  
CCTCAGAAAAGAAATGCTGGAAATGATGTGAAGTGTGACTCCAAAAAGTCTTGTGCTCCCCATAACACCTG

TTGTAAAAAGGCTTCGGGAGGTTGGGGCTGTTGTCTATATGAAGAGGCTGTTTGTCTGGAAGATCAATCC  
CATTGCTGCCCTAAGGGCTACACCTGTGAGGTTTCGGCAGGACTGTGTCTGAAAAAGGATGGCTTCTACT  
GGGATGGTCTGCTCTCTAATAGGAAAAGATCTTTCAGCACCTTGTA

**cDNA data:**

**cDNA sequence data:** No cDNA data (or empty cDNA entry).

**Genomic data:**

**Note:** Genomic data (exons).

From NCBI: BAH001286349.1 GI:405617871

No exon sequence to show (or no genomic sequence entry).

**Coding exon 1 Exon type: sn**

**Note:** Encodes a potential signal peptide (along with the 5 codons from exon 0), and also an N-half module which, with no C-half to complete it, is apparently a paraganulin.

ACTTTGTACAAGTTTTTCAGTGCTATGTCTTTGGCTGGGTCTGGTAACAGCACTGAAATGTCCTGGTGGAT  
TGGTTTGTGACAAATGAAGATCACTGCTGTGAGCTTCCAGGAGGAGGGTATGAGTGTGGCCCTCAGTCAAA  
G

**Coding exon 2 Exon type: n\***

GAGCATATGAGGTCTTTCCCGATGGTCCAGTCTGGAATGTTGAATGAAGTTACAGAGAACTTGTGTCTAG  
ATCACACTTCATGCCCTCTGGAGTACTCCTGTATGCGTACACCTGCAGGGTCCATGGCTGCTGTCTCTGT  
AGAGGAG

From NCBI: BAH001286353.1 GI:405617867

**Note:** Does not overlap with BAH001286349.1, but the first progranulin exon in it is a c\*, which is expected to come next after the n\* exon.

**Coding exon 3 Exon type: c\***

GCTGTATCCTGTCGTGATGGAAATCACTGTTGTCTAAAGGTTTTCTTTGCAGTGCAGATGGGAAATCCT  
GTATAAACGCTTAG

**Coding exon 4 Exon type: n**

ATGACTTGAACCTGGGTGCAATTATTTGTCCAGATGAACTTCTGAGTGTCTGATGAGTCTACCTGCTG  
CCAGTACCAAGTGGACAGTGGGGGTGTTGCCCTTCTCGCAG

**Coding exon 5 Exon type: c**

GCTGTGTGTTGTTTCAGATAAATTGCATTGCTGCCCTCATGGAACATCTTGTGATGTAGCTCACTCTCAGT  
GTTTAAAAGGACTCTCAAAGACACCTATGTGGAGCAGTTTTCCAGCAACCAAGAGAG

**Coding exon 6 Exon type: n'**

**Note:** The n' indicates mutations affecting the first and third Cys codons for the N-half module.

CCCATGATGTGAAATACAATGCCACGAGCAGCTGTCCCCATCTCTTTACAAGCTGTAAAGGGGAGTCTGG  
AGAAGAGACTTGCTGTCTCTATCAAAG

**Coding exon 7 Exon type: cn**

GCTGTGTGCTGTGAAGATCATACCCACTGCTGCCAGAGGGGACCACTTGTGATGTAAAGGAAGGGAAAGT  
GTCAGCACAAAGTCTGGCTATCCCCTGGTTCACTAAGAGACCAGCTGGACCAGTGAAGAAGTCTCTGAC  
TACAGAAGAGAAGAGCGGGGAAAAGAGACGTGAAATGTAATGATACAGTTGCTTGTCTGATGGGAGCACC  
TGTTGTAAGGTGCAGTCTGGAGACTGGGCCTGCTGCCCTGGCTAAA

**Coding exon 8 Exon type: cn**

GCTGTGTGCTGTGAAGATCATATCCACTGCTGTCCAGAGGGGACCACTTGTGATGTAAAGGAAGGAAAGT  
GTCAGCACAAAGTCTGGCTATCCCCTGGTTCACTAAGAGACCAGCTGGACCAGTGAAGAAGTCTCTGAC  
TACAGAAGAGAAGAGCGGGGAAAAGAGACGTGAAATGTAATGATACAGTTGCTTGTCTGATGGGAGCACC  
TGTTGTAAGGTGCAGTCTGGAGACTGGGCCTGCTGCCCTGGCTAAA

**Coding exon 9 Exon type: cn**

GCTGTGTGCTGTGAAGATCATACCCACTGCTGTCCAGAGGGGACCACTTGTGATGTAAAGGAAGGAAAGT  
GTCAGCACAAAGTCTGGCTATCCCCTGGTTCACTAAGAGACCAGCTGGACCAGTGAAGAAGTCTCTGAC  
TACAGAAGAGAAGAGCGGGGAAAAGAGACGTGAAATGTAATGATACAGTTGCTTGTCTGATGGGAACACT  
TGTTGTAAGATGCAGTCTGGGACTGGGGCTGCTGTCTGCGCCTAAT

**Coding exon 10 Exon type: cn**

GCTGTGTGCTGTGAAGATCATATCCACTGCTGTCCAGAGGGGACCACTTGTGATGCAAAGGGAGAAGCAT  
GTAACCAGAATATCTTGGTTGTCCCTGGCTCACTAAGAGACCAGCCACACCTGTGAAGAAGTCTCGGAC  
TACAGAAGAGAAGAGCATGGAAAAGAGATGTGAAATGTAATGATACAGTTGCTTGTCTGATGGGAACACC  
TGTTGTAAGATGCAGTCTGGGAACTGGGGCTGTGCCCATCGCTGAA

From NCBI: AFYH01038604.1 GI:346176232

**Note:** Overlaps BAH001286353.1 including exons 9 and 10, and has two more cn exons given in this entry.

**Coding exon 11 Exon type: cn**

GCAGTGTGCTGTGCTGATCATATCCACTGCTGTCCACAAGGTTATACATGTGAAACCGAAACATGTGAGA  
AGGGGAAGCTATCTTTCCCTTGGATGCAGAAGGAGCCAGCTATTACTAACAAGCTACCTGAAGAAGAAAG  
TGCTCCAGTGAATGTGTGATGATCAAACAGAATGCCCTGTTGGAAATACTTGTGTAAATATAGCACT  
GGAGAGTGGGGATGCTGCCCTCTATCTCAG

**Coding exon 12 Exon type: cn**

GCTGTTTGTGCTGACGTGACCACAAGCATTGTTGCCCAACTGATTATACTTGTGACCTTTTGCATAGCACAT  
GCTCAAAGGGAAAAGATAGCCATTCCCTTGGGTCAGTAAGACCGTGGCGAGAAAAATGATCAGGACTTCTAC  
AGATCCTCTCACTGTTGTGACGTGTGATTCTCATACTAGGTGCCCTGATAGAAAACACATGCTGTAAAGCTT  
CTCACAGGAAAAATGGGCTTGTGTCTCTTCCAAAAT

From NCBI: BAH001286354.1 GI:405617866

**Note:** Overlaps AFYH01038604.1 including exons 11 and 12, and provides the final 2 coding exons for the gene, which are given in this entry.

**Coding exon 13 Exon type: cn**

GCTGTATGTTGTGAAGATCACACACATTGTTGTCTCAGGGATACCAGTGAATGTTTCAAGGCTCAGACTT  
GTGAGTCGCAGGATGGGGTACTCTTTCCCTGGAACATACAGAAAAGCTCCTGTTTACACTTTTCTCCACCTC  
AGAAAAGAAATGCTGGAAATGATGTGAAGTGTGACTCCAAAAAGTCTTGTGTCTCCCATAAACACCTGTTGT  
AAAAAGGCTTCGGGAGGTTGGGGCTGTTGTCTATATGAAGAG

**Coding exon 14 Exon type: c**

**Note:** up to the stop codon.

GCTGTTTGTGCTGTGAAGATCAATCCCATTTGCTGCCCTAAGGGCTACACCTGTGAGTTTTCGGCAGGACTGT  
GCTGAAAAAGGATGGCTTCTACTGGGATGGTCTGCTCTCTAATAGGAAAAGATCTTTCAGCACCTTGTA  
A

**Genomic sequence note:** A genomic sequence is not presented (see note 2 in header).

00028 **L. chalumnae progranulin C** Short name: **L\_chaC** Date entered: 2014-03

**Species:** *Latimeria chalumnae* (Coelacanth)

**Taxonomy (via NCBI):** Eukaryota; Metazoa; Chordata; Craniata; Vertebrata; Euteleostomi; Coelacanthiformes; Coelacanthidae; Latimeria.

**General Comment:** Incomplete sequence. The protein sequence is tentative but the best current prediction for a complete product. Although the progranulin form labelled C was originally chosen for a fish small form, the common occurrence of repeated sequence in the middle of progranulin genes has resulted in a long progranulin encoded in this Coelacanth gene, despite its closer sequence relationship with other fish small forms.

**Protein Sequence**

MKPLAVILLWVGLASSALVCQDGTQCPDQSTCCQTETGFGCCPLLKAVCCSTAYCCPEGYTCNVQEGVCE  
RNLRIPLVSKTPPLENPELSLLRVQSNASVVFCDNFHHCPCDGNCTCCRGPTGTWFCPPHPSAYCCRDGYH  
CCPYGYFCVDVTSTRCVKNGISIPSEDKMAALLATDALSIVSEPPSSAVYCGNQYYCPDGNCTCCTLP  
ACCPHHAICCRDGYHCCPYGYFCDFSTKCTKGGVSIIPSEEKMPALVQTNALSITSESQSSKVVYCGNQY  
YCPDGNCTCCKLP  
ITSESPSSAVYCGNQYYCPDGNCTCCKLP  
PSEAKIPAFVQTSALSITSESPSSAVYCGNKQYCPDGNCTCCKLP  
FCDFTSTKCTKGGVSIIPSEEKMPALVQTNALSITSESPSSAVYCGNQYYCPDGNCTCCKLP  
QSVCCRDGYHCCPAGYFCDLTSTQCIPSNPFPNKKLPPKEINAVSVTSAFDSSNTFCELDHCCLAGNKCCR  
LQsgswgllsists\*

**Transcript:**

### Predicted sequence:

**Note:** Predicted sequence is tentative. It may omit exons at the beginning and end. See notes with the exon data.

**Derivation:** Tentative prediction from exon data (see genomic data below).

```
ATGAAACCATTAGCCGTGATCTTATTGTGGGTGGGCTTGGCTTCCAGTGCAGTGGTGTGCCAGGATGGTA
CTCAATGTCCTGATCAGTCGACCTGCTGTCAAACAGAAACAGGATTTGGTTGCTGTCCACTCTTGAAGGC
TGTTTGTGTTTCCACTGCATACTGCTGCCCGAAGGCTACACCTGTAATGTCCAAGAAGGAGTCTGTGAG
AGGAATGGACTTCGGATTCCCTTTGGTCAGCAAGACTCCACCTCTGGAAAACCCCGAGCTATCTCTACTCC
GTGTTCAGAGCAATGCGTCTGTCGTTTTTTGCGATAACTTCCATCACTGTCTGATGGCAACACTTGTG
TAGAGGCCCAACAGGAACATGGTTCTGCTGTCCACATCCTTCGGCCTATTGTTGCAGGGATGGTTATCAC
TGCTGTCTTATGGCTACTTCTGTGATGTTACTTCAACAAGATGTGTAATAAATGGGGTATCAGTATCCCAT
CAGAAGACAAGATGGCAGCTCTTCTAGCAACAGATGCTTTGAGCATTGTCTCAGAGCCTCCAAGCTCAGC
AGTGTACTGTGGTAACCAGTATTACTGCCCTGATGGCAATACGTGCTGCACGTTACCAAGTGGATCATGG
GCCTGCTGTCTCATCTCACGCCATCTGTTGTAGGGATGGTTATCATTGCTGTCTTATGGCTACTTCT
GTGATTTTACTTCAACAAAATGTACAAAAGGGGGTGTGAGTATCCCATCAGAAGAGAAGATGCCAGCCCT
TGTACAGACGAATGCTTTGAGCATCACCTCAGAATCTCAGAGCTCAAAAGTGTACTGTGGTAACCAGTAT
TACTGCCCTGATGGCAATACATGCTGCAAGTTACCAAGTGGATCATGGGGCTGCTGTCTCATCTCACG
CCATCTGTTGTAGGGATGGTTATCACTGCTGTCTTATGGCTACTTCTGTGATTTTACTTCAACAAAATG
TACAAAAGGGGGTGTGAGTATCCCATCAGAAGAGAAGATGCCAGCCCTTGTACAGACGAATGCTTTGAGC
ATCACCTCAGAGTCTCCGAGCTCAGCAGTGTACTGTGGTAACCAGTATTACTGCCCTGATGGCAATACAT
GCTGCAAGTTACCAAGTGGATCATGGGGCTGCTGTCTCATCTCACGCCATCTGTTGTAGGGATGGTTA
TCACTGCTGTCTTATGGCTACATCTGTGATTTTACTTCAACAAGATGTAAAAGAAGGGGTGTGAGTATC
CCATCAGAAGCCAAGATAACAGCTTTTGTACAGACAAGTGTCTTTGAGCATCACCTCAGAGTCTCCGAGCT
CAGCAGTGTACTGTGGTAACAAGCAGTACTGCCCTGATGGCAATACATGCTGCAAGTTACCAAGTGGATC
ATGGGGCTGCTGTCCACATCTCATGCCATCTGTTGTAGGGATGGTTATCACTGCTGTCTTATGGCTAC
TTCTGTGATTTTACTTCAACAAAATGTACAAAAGGGGGTGTGAGTATCCCATCAGAAGAGAAGATGCCAG
CCCTTGTACAGACGAATGCTTTGAGCATCACCTCAGAGTCTCCGAGCTCAGCAGTGTACTGTGGTAACCA
GTATTACTGCCCTGATGGCAATACATGCTGCAAGTTACCAAGTGGATCTTGGGGCTGCTGTCTTATCGT
CAATCGGTCTGTTGCAGGGACGGTTATCACTGCTGTCTGCTGGCTACTTCTGTGATTTAACTTCAACCC
AATGCATACCAAGCAATCCATTTAACAAGAAATTACCTCCAAAAGAGATTAATGCTGTAAGTGTACCTC
AGCGTTTGATAGTCAAATACATTTTGTGAGTTGGACCACTGTTGTCTTGTGTTAATAAATGCTGCAGG
TTGCAAAgtggcagctgggggctgctgtccatattccaccagttag
```

### cDNA data:

**cDNA sequence data:** No cDNA data (or empty cDNA entry).

### Genomic data:

**Note:** Genomic data (exons).

From NCBI: BAH001048624.1 GI:405887596

**Note:** First coding exon is from 13399-13536 close to the end of this wgs sequence.

**Coding exon 1 Exon type: sn**

**Note:** from the start codon (which is at the beginning of this exon)

```
ATGAAACCATTAGCCGTGATCTTATTGTGGGTGGGCTTGGCTTCCAGTGCAGTGGTGTGCCAGGATGGTA
CTCAATGTCCTGATCAGTCGACCTGCTGTCAAACAGAAACAGGATTTGGTTGCTGTCCACTCTTGAAG
```

From NCBI: AFYH01132928.1 GI:346075846

**Note:** This wgs sequence contains 3 cn exons. It does not overlap with BAH001048624.1, so it is not known if the gap has exons. But the fish small C type progranulins have a cn exon as the second coding exon, and our analysis places the encoded C-half module only of the first of these 3 cn exons in close relationship with the first C-half module in those other fish small forms. Therefore, we tentatively label these exons 2 to 4.

**Coding exon 2 Exon type: cn**

**Note:** Most likely the second coding exon in this gene. But a gap in sequence needs to be bridged.

```
GCTGTTTGTGTTTCCACTGCATACTGCTGCCCGAAGGCTACACCTGTAATGTCCAAGAAGGAGTCTGTG
AGAGGAATGGACTTCGGATTCCCTTTGGTCAGCAAGACTCCACCTCTGGAAAACCCCGAGCTATCTCTACT
CCGTGTTCAGAGCAATGCGTCTGTCGTTTTTTGCGATAACTTCCATCACTGTCTGATGGCAACACTTGT
GTAGAGGCCCAACAGGAACATGGTTCTGCTGTCCACATCCTTCG
```

**Coding exon 3 Exon type: cn**

**Note:** See exon 2 note

```
GCCTATTGTTGCAGGGATGGTTATCACTGCTGTCTTATGGCTACTTCTGTGATGTTACTTCAACAAGAT
```



GTGTA AAAATGGGGTATCAGTATCCCATCAGAAGACAAGATGGCAGCTCTTCTAGCAACAGATGCTTTGAG  
CATTGTCTCAGAGCCTCCAAGCTCAGCAGTGTACTGTGGTAACCAGTATTACTGCCCTGATGGCAATACG  
TGCTGCACGTTACCAAGTGGATCATGGGCTGCTGTCCATCCTCAC

**Coding exon 4 Exon type: cn**

**Note:** see exon 2 note

GCCATCTGTTGTAGGGATGGTTATCATTGCTGTCCCTTATGGCTACTTCTGTGATTTTACTTCAACAAAAT  
GTACAAAAGGGGGTGT CAGTATCCCATCAGAAGAGAAGATGCCAGCCCTTGTACAGACGAATGCTTTGAG  
CATCACCTCAGAAATCTCAGAGCTCAAAGTGTACTGTGGTAACCAGTATTACTGCCCTGATGGCAATACA  
TGCTGCAAGTTACCAAGTGGATCATGGGGCTGCTGTCCATCCTCAC

From NCBI: BAH001048630.1 GI:405887590

**Note:** This wgs contig contributes another 3 cn exons and a c-half in another exon. This 4th exon is like a cn exon with mutations in the n sequence and a likely splice donor before the mutant n. This wgs sequence does not overlap with AFYH01132928.1, but continues a repeat of cn exons closely related to the tentative exon 4 in AFYH01132928.1, so for now it is reasonable to continue the numbering in labelling these exons.

**Coding exon 5 Exon type: cn**

**Note:** The labelling as exon 5 is tentative, but if there is another exon in the data gap, it will likely be one of these repeat exons.

GCCATCTGTTGTAGGGATGGTTATCACTGCTGTCCCTTATGGCTACTTCTGTGATTTTACTTCAACAAAAT  
GTACAAAAGGGGGTGT CAGTATCCCATCAGAAGAGAAGATGCCAGCCCTTGTACAGACGAATGCTTTGAG  
CATCACCTCAGAGTCTCCGAGCTCAGCAGTGTACTGTGGTAACCAGTATTACTGCCCTGATGGCAATACA  
TGCTGCAAGTTACCAAGTGGATCATGGGGCTGCTGTCCATCCTCAC

**Coding exon 6 Exon type: cn**

GCCATCTGTTGTAGGGATGGTTATCACTGCTGTCCCTTATGGCTACATCTGTGATTTTACTTCAACAAGAT  
GTAAAAGAAGGGGGTGT CAGTATCCCATCAGAAGCCAAGATACCAGCTTTTGTACAGACGAATGCTTTGAG  
CATCACCTCAGAGTCTCCGAGCTCAGCAGTGTACTGTGGTAACAAGCAGTACTGCCCTGATGGCAATACA  
TGCTGCAAGTTACCAAGTGGATCATGGGGCTGCTGTCCACATCCTCAT

**Coding exon 7 Exon type: cn**

GCCATCTGTTGTAGGGATGGTTATCACTGCTGTCCCTTATGGCTACTTCTGTGATTTTACTTCAACAAAAT  
GTACAAAAGGGGGTGT CAGTATCCCATCAGAAGAGAAGATGCCAGCCCTTGTACAGACGAATGCTTTGAG  
CATCACCTCAGAGTCTCCGAGCTCAGCAGTGTACTGTGGTAACCAGTATTACTGCCCTGATGGCAATACA  
TGCTGCAAGTTACCAAGTGGATCTTGGGGCTGCTGTCCCTTATCGTCAA

**Coding exon 8 Exon type: c**

**Note:** It has not been possible to find downstream exons in the wgs data to complete this gene as one would expect the coding sequence to end. Just in case this is an unusual last coding exon, the sequence through to a stop codon has been included here (in lower case after a possible splice donor).

TCGGTCTGTTGCAGGGACGGTTATCACTGCTGTCCCTGCTGGCTACTTCTGTGATTTAACTTCAACCCCAAT  
GCATACCAAGCAATCCATTAAACAAGAAAATTACCTCCAAAAGAGATTAATGCTGTAAGTGTACCTCAGC  
GTTTGATAGCTCAAATACATTTTGTGAGTTGGACCACTGTTGTCTTGGTAAATAAATGCTGCAGGTTG  
CAAAGtggcagctgggggctgctgtccatattccaccagtttag

**Genomic sequence note:** A genomic sequence is not presented (see note 2 in header).

---

00035 **N. vectensis progranulin** Short name: **N\_vec** Date entered: 2014-03

**Species:** *Nematostella vectensis* (starlet sea anemone)

**Taxonomy (via NCBI):** Eukaryota; Metazoa; Cnidaria; Anthozoa; Hexacorallia; Actiniaria; Edwardsiidae; Nematostella.

**General Comment:**

**Protein Sequence**

MLSLVVLVILGATPVISVQCPGGEVECPDDYTCLMPNRMYGCCPIPNAVCCSDLRHCCPYGYKCDTSG  
GACIRGKHVLQLLKKIPSLSVKVASPIKNQKDVLCPEDESVC PDGNTCCLETFGLYGCCPTPKAVCCLDRL  
HCCPSGYKCDLARHECVQENVQINSQVKPLIHLRQKNKILGTTVCPDKASKCPDGNTCCKLSSDQYGCC  
PLPNAMCCDDGVHCCPNGYTCDTSSGRCSKGDSVLPFLFKKTPAKQLKNVVC PDGASECPDGNTCCKLSSG  
QYGCCPLPNAVCCDDGVHCCPNGYTCDTASGTCNKGDSVLPFLFKKTPAKQLKNVVC PDGTSQCPDGNTCC  
KLSSGQYGCCPLPNAVCCDDGVHCCPDGYTCNSSSGTCSGDSVLPFLFKKTPAKQLKNVVC PDGASHCPD

GNTCKLSSGQYGCCPLPNAVCCDDGVHCCPNGYTCNSSGGTCNKGDSVLPFLFKKTPAKQLKHVPCPDGT  
SQCPDGNCKLSSGQYGCCPLPNAVCCDDGVHCCPNGYTCNSSSGTCSEGDVLPFLFKKTPAKQLKNVV  
CPDETSQCPDGNCKLSSGQYGCCPLPNAVCCDDGVHCCPNGYTCDTSSGRCKGDSVLPFLFKKTPAKQ  
LKNVVCPPGGEAECPDGNCKLSSGQYGCCPLPNAVCCDDGSVLPFLVKKTPAQKFKHVICEGSHLACPDG  
TTCKKRSGGYACCPKAVCCSDEVHCCPNGYSCDLSSKKCVKGASRVPILQNSLALCIDIQTTSELST  
LHSVLSISAANNRPGASGANYITCNDGSHCYDYETCELSGSGCCPLPNAVCCSDGKHCCPCGYHCDI  
SSSTCDMAKDSTPMVSYHATVQRAGVGEIKCKDGSCHNTGETCCLVGP TKYGCCPLPSAVCCADMQHCCP  
SGYTCKDKSEHCQRGRHVLPMFQKHPVHPRPAVAKTPVIIDHTIRFVPRGGRGAGCTCEPYHTCCGSSS  
AQQHCCPLPNASCCSDGLHCCPQGFICDDQKGCVKQP\*

## Transcript:

### Predicted sequence:

**Note:** The last approximately 60% is confirmed by cDNA data.

**Derivation:** predicted from stellabase c441202720.Contig1

ATGTTGAGTCTAGTCGTAGGGCTGGTGATACTTGGTGCAACTCCAGTGATCTCTGTCCAATGTCCAGGTG  
GAGAGGTGGAGTGTCTGATGACTATACTGTTGTCTAATGCCCAATAGAAATGATGGCTGTTGCCCTAT  
CCCCAATGCTGTCTGTTGTTTCAGATCTAAGGCACTGCTGCCCTTATGGTTACAAAATGTGATACATCAGGA  
GGGGCTGCATAAGAGGAAAGCATGTGCTACAGCTGCTCAAGAAAAATCCCATCTCTTTTCAGTTAAGGTTG  
CCAGCCCCATCAAAAATCAGAAGGATGTTTTGTGCCAGATGAATCTGTTTGTCCAGATGGTAACACCTG  
CTGTTTAACTGAATTTGGACTGTAAGGCTGCTGCTTACACAAAAGCAGTGTGTTGCCCTTGATCGCCTA  
CACTGCTGTCCAGTGGATAACAAGTGTGACCTTGCCAGGCATGAATGTGTGTCAGGAAAAATGTGCAAACGA  
ATTCACAGGTCAAACCTCTTATCCATTTAAGGAAACAAAACAAAGATATATTAGGTACTACTGTCTGTCC  
AGACAAGGGCTCAAAGTGTCCCGATGGTAATACTTGTCTGCAAACATCTCTGATCAATACGGCTGCTGT  
CCTCTTCCCAACGCTATGTGCTGTGATGATGGCGTTCAGTGTGCCCTAATGGATACACGTGCGACACCT  
CGAGTGGCAGATGCAGCAAAGGAGACTCCGTGCTTCCACTTTTTCAAGAAAAACACCAGCCAAGCAGCTGAA  
GAATGTTGTTTGTCCAGACGGGGCGTCAGAGTGTCCCGATGGTAATACTTGTCTGCAAACATCTCTGTT  
CAATACGGCTGCTGTCTCTTCCCAATGCTGTGTGCTGTGATGATGGCGTTCAGTGTGCCCTAATGGAT  
ACACGTGCGACACTGCGAGTGGCACATGCAACAAAGGAGACTCTGTGCTTCCACTTTTTCAAGAAAAACACC  
AGCCAAGCAGCTAAAGAATGTTGTCTGTCCAGACGGGACGTCACAGTGTCCCGATGGTAATACTTGTCTG  
AAACTATCTCTGGTCAATACGGCTGCTGTCTCTTCCCAACGCTGTGTGCTGTGATGATGGCGTTCAGT  
GCTGCCCTGATGGATACACGTGCAACTCTCGAGTGGCACATGCAGCGAAGGAGACTCCGTGCTTCCACT  
TTTTCAAGAAAAACACCAGCCAAGCAGCTGAAGAAATGTTGTTTGTCCAGACGGGGCGTCACACTGTCCCGAT  
GGTAATACTTGTCTGCAAACATCTCTGGTCAATACGGCTGCTGTCTCTTCCCAACGCTGTGTGCTGTG  
ATGATGGCGTTCAGTGTGCCCTAATGGATACACGTGCAACTCTCGGGAGGCACATGCAACAAAGGAGA  
CTCTGTGCTTCCACTTTTTCAAGAAAAACACCAGCCAAGCAGCTGAAGCATGTTGTTTGTCCAGACGGGACG  
TCACAGTGTCCCGATGGTAATACTTGTCTGCAAACATCTCTGGTCAATACGGCTGCTGTCTCTTCCCA  
ACGCTGTGTGCTGTGATGATGGCGTTCAGTGTGCCCTAATGGATACACGTGCAACTCTCGAGTGGCAC  
ATGCAGCGAAGGAGACTCCGTGCTTCCACTTTTTCAAGAAAAACACCAGCCAAGCAGCTGAAGAAATGTTGTT  
TGCCAGACGAGACGTCACAGTGTCCCGATGGTAATACTTGTCTGCAAACATCTCTGGTCAATACGGCT  
GCTGTCTCTTCCCAATGCTGTGTGCTGTGATGATGGCGTTCAGTGTGCCCTAATGGATACACGTGCGA  
CACCTCGAGTGGCAGATGCAACAAAGGAGACTCTGTGCTTCCACTTTTTCAAGAAAAACACCAGCCAAGCAG  
CTGAAGAAATGTTGTTGTGTCAGGTGGGGAAGCAGAAATGTCCCGATGGTAATACTTGTCTGCAAACATCTCT  
CTGGTCAATACGGCTGCTGTCTCTTCCCAATGCTGTGTGCTGTGATGATGGCTCTGTGCTTCTCTCGT  
CAAGAAAAACACCAGCTCAGAAGTTCAAGCATGTTATCTGCGAGGGTAGTCACCTTGCAATGCCAGATGGT  
ACCACTTGTGTAAGAGAGGTCAGGGGGTTACGCTTGTCTGCAATCCCCAAGGCCGTTTGTGTTGCTCGG  
ATGAAGTCCACTGCTGCCCTAATGGGTATTCTTGTGACCTTTCCAGTAAAAAATGTGTCAAGGGTGTCTT  
TCGCGTGCCGATTTTACAGAACTCTCTTGGCCCTTTGCATTGATATACAGACGACATCAGAATTATCCACA  
CTTACAGTGTTAGTTTGTATCGGCTGCGAATAACCGACCAGGGGCTTCAGGAGCGAATTACATCACTT  
GCAACGACGGTTCTCACTGCTACGATTATGAAACTTGTGCGAACTTTCTACCGGCTCTACGGCTGCTG  
TCCCTACCTAACGCTGTCTGCTGTAGCGATGGCAAGCACTGCTGCCCGTGTGGTTATCACTGCGACATA  
AGCTCGTGCAGCTGCGACATGGCCAAGGACTCTACACCTATGGTCTCATAACCAGCAACTGTTACAGCGTG  
CTGGCGTTGGCGAAAATCAAATGCAAAGACGGTTCGCACTGTAACACCGGTGAAACGTGTGCTGCTGTTG  
GCCAACCAAATACGGCTGTTGTTCCCTTCCCTCAGCTGTTTGTGTGCTGACATGCAGCACTGCTGTCTCT  
TCGGGTACACTTGTCAACGACAAAGAGCGAACATTGTGAGCGAGGACGCCATGTTTTACCGATGTTCCAAA  
AGCACCCCTCGGTGCAATCCACGACCTGCTGTTGCAAAGACGCTGTGATTATCGATCATAACGATTCTGTT  
CGTGCCGAGAGGTGGCCGAGGTGCTGGATGCACCTGCGAGCCGTACCACACATGCTGTGGCTCTCTGTT  
GCTCAGCAGCACTGCTGTCTCTTCCGAATGCTTCGTGCTGCAAGCATGGTCTGCATTGTTGTCCACAAG  
GGTTCATTTGCGATGACCAAAGGGCTGTGTCAAACAACCATAG

**cDNA data:**

**From:** NCBI est: Contig of GI:(162034518, 161990857, 162099514, 82863220, 162101879, 162095075, 162034168, 162046635, 161990856, 162090445, 162098231, 162101878, 162090446, 162098232)

**Note:** In assembling the cDNA data, Cap3 produced 2 contigs, which were found to overlap by 15 bases to produce this sequence. It is consistent with the prediction from genomic data, and confirms the last 60% of the prediction.

GTGTCGATGGTATACTTGCTGCAACTATCCTCTGGTCAATACGGCTGCTGTCTCTTCCCAACGCTGTG  
TGCTGTGATGATGGCGTTCCTGCTGCCCTAATGGATACACGTGCAACTCCTCGGGAGGCACATGCAACA  
AAGGAGACTCTGTGCTTCCACTTTTTCAAGAAAAACACCAGCCAAGCAGCTGAAGCATGTTGTTTGTCCAGA  
CGGGACGTCACAGTGTCCCGATGGTAATACTTGCTGCAAACTATCCTCTGGTCAATACGGCTGCTGTCT  
CTTCCCAACGCTGTGTGCTGTGATGATGGCGTTCCTGCTGCCCTAATGGATACACGTGCAACTCCTCGA  
GTGGCACATGCAGCGAAGGAGACTCCGTGCTTCCACTTTTTCAAGAAAAACACCAGCCAAGCAGCTGAAGAA  
TGTTGTTTGTCCAGACGAGACGTCACAGTGTCCCGATGGTAATACTTGCTGCAAACTATCCTCTGGTCAA  
TACGGCTGCTGTCTCTTCCCAATGCTGTGTGCTGTGATGATGGCGTTCCTGCTGCCCTAATGGATACA  
CGTGCGACACCTCGAGTGGCAGATGCAACAAAAGGAGACTCTGTGCTTCCACTTTTTCAAGAAAAACACCAGC  
CAAGCAGCTGAAGAAATGTTGTGTGTCAGGTGGGGAAAGCAGAATGTCCCGATGGTAATACTTGCTGCAAA  
CTATCCTCTGGTCAATACGGCTGCTGTCTCTTCCCAATGCTGTGTGCTGTGATGATGGCTCTGTGCTTC  
CTCTCGTCAAGAAAAACACCAGCTCAGAAGTTCAAGCATGTTATCTGCGAGGGTAGTCACCTTGCATGCC  
AGATGGTACCCTTGTGTAAGAAGAGGTCAGGGGGTTACGCTTGCTGTCCAATCCCCAAGGCCGTTTGT  
TGCTCGGATGAAGTCCACTGCTGCCCTAATGGGTATTCTTGTGACCTTTCAGTAAAAAATGTGTCAAGG  
gtgcttctcgctgcccattttacagaactctcttgccctttgcatgatatacagacgacatcagaatt  
atccacacttcacagtgttagttgatatcggtcgcaataaccgaccaggggcttcaggagcgaattac  
atcacttgcaacgacggttctcactgctacgattatgaaacttgctgcaactttctaccggtcctacg  
gctgctgtcccctacctaacgctgtctgctgtagcgatggcaagcactgctgcccgtgtggttatcactg  
cgacataagctcgtcgacgtgagacatggccaaggactctacacctatggtctcataccacgcaactgtt  
cagcgtgctggcgttggcgaaatcaaatgcaaaagcgggttcgcaactgtaacaccggtgaaacgtgctgcc  
ttgtggggccaaccaaatacggtgttgtcccctccctcagctgtttgctgtgctgacatgcagcactg  
ctgtccttcgggctacacttgcaacgacaagagcgaacattgtcagcagggacgccatgtttaccgatg  
ttccaaaagcaccctcggtgcatccacgacctgctgttgcaaaagcgcctgtgattatcgatcatacga  
ttcgtttcgtgccgagaggtggccgaggtgctggatgcacctgagcagccgtaccacacatgctgtggctc  
ctcgtccgctcagcagcactgctgtcctctccgaatgcttcgtgctgagcagatggtctgcatgttgt  
ccacaaggggttcatttgcatgaccaaagggtgctgtcaaacaccatagactcatacagtacagtc  
gaatcgtgacaagcgttcccttgatctttccattgtatgtaaaaaataacccttttgtgtcacagacgaa  
ctccgagctacgatggttagatagctattcaataactaatttctagaatattatTTTTTATTTTTTGGTAC  
caaacgatctTTTTTgtaactatacgattcggaataaaaaaaatacatcatcaaaaaa

**Genomic data:**

**Note:** Genomic data (exons). The gene was predicted from stellabase c441202720.Contig1. The NCBI entry gi: 149353570 gb: ABAV01000652.1 has errors. With only 3 exons encoding just over 12 modules, this gene is different from vertebrate progranulin genes. The second exon encodes nearly 9 modules, the eighth of which is truncated in the C-half. Six and the truncated module constitute a repeat displaying a high level of identity. Among the chordates, Branchiostoma presents a similar example of repetitive multiple module exons.  
From stellabase: c441202720.Contig1

**Coding exon 1 Exon type: snc**

**Note:** from the start codon (which is at the beginning of this exon)

ATGTTGAGTCTAGTCGTAGGGCTGGTACTTGCTGCAACTCCAGTGTCTCTGTCCAATGTCCAGGTG  
GAGAGGTGGAGTGTCTGATGACTATACCTGTTGTCTAATGCCAATAGAATGTATGGCTGTTGCCCTAT  
CCCCAATGCTGTCTGTTGTTTACAGATCTAAGGCACTGCTGCCCTTATGGTTACAAATGTGATACATCAGGA  
GGGCCTGCATAAGAGGAAAGCATGTGCTACAGCTGCTCAAGAAAAATCCCATCTCTTTCAGTTAAG

**Coding exon 2 Exon type: ncnncnncnncnc”nc**

**Note:** Here c” encodes the beginning of a C-half module lacking the last 4 Cys of the motif.

GTTGCCAGCCCCATCAAAAAATCAGAAGGATGTTTTGTGCCAGATGAATCTGTTTGTCCAGATGGTAACA  
CCTGCTGTTTAACTGAATTTGGACTGTATGGCTGCTGTCTTACACCAAAAGCAGTGTGTTGCCCTTGTATCG  
CCTACACTGCTGTCCAGTGGATACAAGTGTGACCTTGCCAGGCATGAATGTGTGCAGGAAAAATGTGCAA  
ACGAATTACAGGTCAAACCTCTTATCCATTTAAGGAAAAACAAAGAAATATATTAGGTACTACTGTCT  
GTCCAGACAAGGCGTCAAAGTGTCCCGATGGTAATACTTGCTGCAAACTATCCTCTGATCAATACGGCTG  
CTGTCTCTTCCCAACGCTATGTGCTGTGATGATGGCGTTCCTGCTGCCCTAATGGATACACGTGCGAC  
ACCTCGAGTGGCAGATGCAGCAAAGGAGACTCCGTGCTTCCACTTTTTCAAGAAAAACACCAGCCAAGCAGC  
TGAAGAAATGTTGTTTGTCCAGACGGGGCGTCAGAGTGTCCCGATGGTAATACTTGCTGCAAACTATCCTC

TGGTCAATACGGCTGCTGTCCTCTTCCCAATGCTGTGTGCTGTGATGATGGCGTTCACTGCTGCCCTAAT  
GGATACACGTGCGACTGCGAGTGGCACATGCAACAAAAGGAGACTCTGTGCTTCCACTTTTCAAGAAAA  
CACCAGCCAAGCAGCTAAAAGAAATGTTGTCTGTCCAGACGGGACGTACAGTGTCCCGATGGTAATACTTG  
CTGCAAACCTATCCTCTGGTCAATACGGCTGCTGTCCTCTTCCCAACGCTGTGTGCTGTGATGATGGCGTT  
CACTGCTGCCCTGATGGATAACAGTGAACCTCTCGAGTGGCACATGCAGCGAAGGAGACTCCGTGCTTC  
CACTTTTCAAGAAAAACACCAGCCAAGCAGCTGAAGAAATGTTGTTTGTCCAGACGGGGCGTCACACTGTCC  
CGATGGTAATACTTGTGCAAACCTATCCTCTGGTCAATACGGCTGCTGTCCTCTTCCCAACGCTGTGTGC  
TGTGATGATGGCGTTCACTGCTGCCCTAATGGATAACAGTGAACCTCTCGGGAGGCACATGCAACAAAAG  
GAGACTCTGTGCTTCCACTTTTCAAGAAAAACACCAGCCAAGCAGCTGAAGCATGTTGTTTGTCCAGACGG  
GACGTACAGTGTCCCGATGGTAATACTTGTGCAAACCTATCCTCTGGTCAATACGGCTGCTGTCCTCTT  
CCCAACGCTGTGTGCTGTGATGATGGCGTTCACTGCTGCCCTAATGGATAACAGTGAACCTCTCGAGTG  
GCACATGCAGCGAAGGAGACTCCGTGCTTCCACTTTTCAAGAAAAACACCAGCCAAGCAGCTGAAGAAATGT  
TGTGTCCAGACGAGACGTACAGTGTCCCGATGGTAATACTTGTGCAAACCTATCCTCTGGTCAATAC  
GGCTGCTGTCCTCTTCCCAATGCTGTGTGCTGTGATGATGGCGTTCACTGCTGCCCTAATGGATAACAGT  
GCGACACCTCGAGTGGCAGATGCAACAAAAGGAGACTCTGTGCTTCCACTTTTCAAGAAAAACACCAGCCAA  
GCAGCTGAAGAAATGTTGTGTGTCAGGTGGGGAAAGCAGAATGTCCCGATGGTAATACTTGTGCAAACCTA  
TCCTCTGGTCAATACGGCTGCTGTCCTCTTCCCAATGCTGTGTGCTGTGATGATGGCTCTGTGCTTCCCTC  
TCGTCAAGAAAAACACCAGCTCAGAAAGTTCAAGCATGTTATCTGCGAGGGTAGTCACCTTGCATGCCCAGA  
TGGTACCACTTGTGTAAGAAAGAGGTACGGGGTTACGCTTGTGTCCAATCCCAAGGCCGTTTGTGTC  
TCGGATGAAGTCCACTGCTGCCCTAATGGGTATTCTTGTGACCTTTCCAGTAAAAAATGTGTCAAGGGTG  
CTTCTCGCGTGCCGATTTTACAGAACTCTCTTGCCTTTGCATTGATATACAGACGACATCAGAAATTATC  
CACACTTCACAGTGTAGTTTGTATATCGGCTGCGAATAACCGACCAG

**Coding exon 3 Exon type: ncnnc**

**Note:** up to the stop codon.

GGGCTTCAGGAGCGAATTACATCACTTGAACGACGGTTCTCACTGCTACGATTATGAAACTTGCTGCGA  
ACTTTCACCGGCTCCTACGGCTGCTGTCCCTACCTAACGCTGTCTGTCTGTAGCGATGGCAAGCACTGC  
TGCCCGTGTGGTTATCACTGCGACATAAGCTCGTTCGACGTGCGACATGGCCAAGGACTCTACACCTATGG  
TCTCATAACCACGCAACTGTTACAGCGTGTGGCGTTGGCGAAATCAAATGCAAAGACGGTTCGCACTGTAA  
CACCGGTGAAACGTGTGCTTGTGGGGCAACCAAATACGGCTGTTGTCCCTTCCCTCAGCTGTTTGC  
TGTGCTGACATGCAGCACTGCTGTCCTTCGGGTACACTTGAACGACAAGAGCGAACATTGTGAGCGAG  
GACGCCATGTTTACCGATGTTCCAAAAGCACCCCTCGGTGCATCCAGACCTGCTGTTGCAAAGACGCC  
TGTGATTATCGATCATAAGATTCTTCTGTCGGAGAGGTGGCCGAGGTGCTGGATGCACCTGCGAGGCC  
TACCACACATGCTGTGGCTCCTCGTCCGCTCAGCAGCACTGCTGTCTCTTCCGAATGCTTCTGTGCTGCA  
GCGATGGTCTGCATTGTTGTCCACAAGGGTTCATTTCGATGACCAAAGGGCTGTGTCAAACAACCCATA  
G

**Genomic sequence note:** A genomic sequence is not presented (see note 2 in header).

---

00039 **O. lobularis progranulin** Short name: **O\_lob** Date entered: 2014-03

**Species:** *Oscarella lobularis* (Sponge)

**Taxonomy (via NCBI):** Eukaryota; Metazoa; Porifera; Demospongiae; Homoscleromorpha; Homosclerophorida; Plakinidae; *Oscarella*.

**General Comment:** Only cDNA data and only a partial transcript sequence. *O. lobularis* provided the first evidence of a progranulin in sponge, and its granulin sequences were used for an outgroup in analyses of chordate granulin modules. Unfortunately, no new sequences for this species have arrived in the database, but there has been more recent data accumulating from other sponges.

**Protein Sequence**

Protein sequence not yet prepared. May be too incomplete to show.

**Transcript:**

**Note:** Only 2 EST sequences, both providing data for the beginning of a reading frame for a signal peptide, a demi-module which has a Cys motif C-C-CC-C-C, and almost 3 granulin modules. The encoded polypeptides differ by 6% and may be alleles. We refer to them as O\_lob1 and O\_lob2.

The cDNA data define the transcript well (below), so no predicted sequence is required.

**cDNA data:**

**From:** NCBI: AM762841.1 GI:193857770

**Note:** This cDNA fragment provides incomplete 5'end data for the transcript.

```
GTTTTGCTTTTCCAAGCTCGCCTCGTGCTTTCCACAGCCCAAGAAAGTGCTTCAAACCATGGCTCCTCTTA
CAGCGGCTTGCATCGTGTTCCGCCAATCTGCGCGATTAGCGAGTGCAAATCGGTGTGTCCAGAAGGCAA
CGTGCCCTGTCCCTTGAATGACGGGACAATCAGCTGCTGCAACGAGGGATACTTCTGTGGAAGCAACGGT
ACTTGTCTTCAGTGGAACGACGCGAGCAATGTTATATGTCTGATGGACAGTCTCAATGTCCGGCTGGAA
ATACTTGTGCAAATTGTCTAGTGGACAATGGGGATGCTGTCTCTTCCAAATGCAGTCTGTTGTCTTAA
CGGCGAAAATTGTGTCCATCGGGATACACTTGTGATGTATCTGCGGGCACTTGCACGAAAGGAGACATT
GCGATAGCTATGATTGAAAAAAGGCCTGTGCTTTGAGAGAAGGAGACGTCACATGTCTGATGGACAGT
CTGAATGTCCGACTGGAAAATACATGTTGCAAACGTCTAGTGGACAATGGGGATGCTGTCTTATCCAAA
TGCAGTCTGTTGTCTGACGGAAAACATTGTGTCCATCAGGATACACTTGTGATCTTTCAGCGGGCACT
TGCACGAAAGGAGACATTGCCATAGCTATGATTGAAAAAACGCCTGTGCTTTGAGAGAAGAAAACGTTG
TATGTCTGATGGACAGTCTCAATGTCCGGCTGGAAAATACTTGTGCAAATTGTCTAGTGGACAATGGGG
ATGCTGTCTCTTCCAAATGCAGTCTGTTGTCTAACGGAGAAAATTGTGTCCATCGGGATACACTTGT
GATGTAT
```

**From:** NCBI: AM763289.1 GI:193860561

**Note:** This cDNA fragment provides incomplete 5'end data for the transcript.

```
CGCCTCGTGCCCTCCACAGCCCAAGAAATGCTTCAAACCATGGCTCCTTACAGCGGCTTGCATCGTTT
TCGCCGCAATCTGCGCGATTAGCGAGTGCAAATCGGTGTGTCCAGAAGGCAACGTGCCCTGTCCCTTGAA
TGACGGGACAATCAGCTGCTGCAACGAAGGATACTTCTGTGGAAGCAACGGTACTTGTCTTCAGTGGAAC
GACGCGAGCAATGTTATATGTCTGATGGACAGTCTGAATGTCCGGCTGGAAAATACTTGTGCAAATTGT
CTAGTGGACAATGGGGATGCTGTCTCTTCCAAATGCAGTCTGTTGTCTAACGGAGAGAATTGTGTCTCC
ATCAGGATACACTTGTGATCTATCAGCGGGCACTTGCACGAAAGGAGACATTGCCATAGCTATGATTGAA
AAAAGGCCTGTGCTTTGAGAGAAGGAGACACATGTCTGATGGACAGTCTGAATGTCCGACTGGAAATA
CATGTTGCAAACGTCTAGTGGAGAATGGGGATGCTGTCTCTTCCAAATGCAGTCTGTTGTCTTGACGG
AGAACACTGTGTCCATCAGGATACACTTGTGATCTATCAGCGGGCACTTGCACAAAAGGAGACATTGCC
ATAGCTATGATTGAAAAAAGGCCTGTGCTTTGAGAGAAGGAGACACATGTCTGATGGACAGTCTGAAT
GTCCGACTGGAAAATACATGTTGCAAACGTCTAGTGGAGAATGGGGATGCTGTCTCTTCCAAATGCAGT
CTGTTGTCTGACGGAGAACACTGTGTCCATCAGGA
```

### Genomic data:

**Note:** There are no genomic sequence data for this species at this time.

No genomic sequence to show (or empty ID or entry).

No exon sequence to show (or no genomic sequence entry).

**Genomic sequence note:** A genomic sequence is not presented (see note 2 in header).

---

00010 **O. niloticus progranulin A** Short name: **O\_nilA or tilapA** Date entered: 2014-03

**Species:** *Oreochromis niloticus* (Nile tilapia)

**Taxonomy (via NCBI):** Eukaryota; Metazoa; Chordata; Craniata; Vertebrata; Euteleostomi; Actinopterygii; Neopterygii; Teleostei; Euteleostei; Neoteleostei; Acanthomorpha; Acanthopterygii; Percomorpha; Perciformes; Labroidae; Cichlidae; African cichlids; Pseudocrenilabrinae; Oreochromini; Oreochromis

**General Comment:**

### Protein Sequence

```
MQKWVVICWAVLAVVGADVCPDGGGLCKEGETCCNSPENGYGCCRYENAECDDHIHCCPAGTVCNKALSG
CINTTLTIPWVKRTPADQPKLCKSFRMIKAYESQEDDNICPDLRCPAEFSLKGLTKFGCCPLTQGIS
PDGKHCCPEGHDCSSDSRACIKKEIVVTVLCSDBGVSECPDGTTCCEETTEGKWACCPKPAVCCADKIHCC
SEGTTCDVEHSCIKIHSSTKKEMPMWAFLPARVRAAWENQKEVPVEAVNNTGTENAPKGTANLLPPSAND
VPCDDTSACPDGTTCCKTQEGGWACCPMPEAVCCEDFIHCCPKGKKNLEAQTCEDEGLTSVPWAKKVPFI
IKQKVEEKVPCDHATAACPDNTTCCKTKEGRWACCPMPEAVCCNDHKHCCPNGTTCDDQTSMSCNGPSGST
PMLQKVPFAFTTGAPTTVQPTTESPTTSSKAEEDKEEEGMI SDAHTSCPQLTCCYMKKFEKWGCCPLP
EAVCCEDGSHCCPKQYKCDNSRTSICKGEVVIPWYTKIPAITSDAEAPSSVQCEGANQCPEQTSCKLFT
GEWGCCPLKNAVCCPDKEHCCPQGYTCDILSRSCQKLIMMQLERVPVLPVYLLPEPEPQLSPTKHKDIKCD
DKTDCGHDETCRTSATSWGCCPSNAVCCSDMKHCCPTGYTCTKEGSCIQNSKLYWPNWHVFLANKKRA
LIV*
```

**Transcript:**

**Note:** Incomplete direct cDNA sequence data. Limited est sequence data available at time of entry.

**Predicted sequence:**

**Note:**

**Derivation:** NCBI: GI: 542182094 XM\_005469021.1

GTACAGCAACATTAAAGGCACCTCCTCTCCCTCCCGTTTCGGGGTGTGTTCAAGAGTATGCGGGCTATCAC  
TTGTGTCATTTTGTGGCGAGACTCTTGTGAAACACCTGCTCACAAACAGCCCTTCTGTTCAATTTTTTCAA  
CAAAGATGCAGAAAGTGGGTTGTGATCTGCTGGGGCCGCTCGGCTGTGGTTGGTGTGATGTGTGTCCAGA  
TGGAGGGCTGTGTAAAGAAAGGGGAAACCTGCTGCAACAGCCAGAAAACGGCTACGGGTGTTGCCGATAT  
GAAAACGCTGAGTGTGTGATGATCACATCCACTGCTGTCCAGCGGGCACAGTCTGTAATAAAGCCTTAT  
CTGGCTGTATTAATAACCACCTGACCATCCCATGGGTGAAAAGAACCCCTGCTGATCAGCCAAACTCTG  
TAAATCCTTCAGGATGATCAAGGCCACGAGAGTACAGGAAGACGACAACATCTGCCCCGATCTGTACGA  
TGCCCTGCTGAGTTTTCTGTCTGAAGGGTTTGACGAAGTTTGGCTGCTGTCTCTAACTCAGGGAACTC  
CCTGCCCCGATGGCAAACACTGCTGCCCTGAGGGCCACGACTGCAGCTCAGACAGCCGCGCTGCATCAA  
AAAAGAGATCGTGGTTACAGTTCTATGACAGCGATGGCGTTTCGGAGTGCCAGATGGTACCACCTGCTGT  
GAAACAACAGAAAGGCAAATGGGCAATGCTGTCCACTACCAAAGGCCGTGTGCTGCGCTGACAAGATACT  
GCTGTCTGAAGGAACACATGTGATGTCGAGCATTCCAAATGCATTCACTCTTCTACCAAGAAAAGAGAT  
GCCAATGTGGGCAAAGCTCCCTGCCAGAGTGAGAGCAGCTTGGGAAAACAGAAAAGATGCCAGTTGAG  
GCGGTGAATAACACAGGAACAGAAAACGCCCCCAAAGGCACCACAGCCAATCTGCTTCTCCATCTGCCA  
ACGATGTTCCATGTGACGATACATCAGCCTGTCTGATGGCACCACCTGCTGTAAAACCCAAAGAGGTGG  
CTGGGCTGCTGTCCAAATGCCAGAGGCTGTTTGTGTGAAAGACTTCATACACTGTTGTCCAAAAGGGGAA  
AAATGTAACCTGGAGGCTCAAACCTGTGAGGACGGCTGACCTCTGTGCCCTGGGCAAGAGGTTCTGTG  
CAATCATAAAGCAGAAAAGTAGAGGAGAAGAAAGTTCTTGTGATCACACAGCAGCCTGTCTGATAACAC  
CACCTGCTGTAAAACGAAAAGGTCGCTGGGCTGCTGTGCAATGCCAGAGGCGGTCTGCTGCAACGAT  
CACAAACACTGCTGCCGAAACGGCACCACCTGTGACCAGACCTCCATGTCTGCAATGGCCCATCAGGCT  
CAACTCCCATGCTACAGAAGGTACTGCGTTCACTACTGGAGCACCTACTACTGTGCAGCTTACAACCTGA  
GAGTCCAACAACAAGCTCTAAAGCGGAGGAGGAGGACAAAAGAAGAAGGCATGATTAGCTGTGATGCC  
CACACCAGCTGCCCTCAGTTGACCACCTGCTGTACATGAAGAAGTTTGAAGAGTGGGGCTGCTGCCCGC  
TGCTGAGGCGGTGTGCTGTGAGGATGGGAGTCACTGTTGTCTAAACAGTATAAATGTGACAATAGCCG  
CACGTCAATGATAAAAAGGAGAAGTGGTGATTCCATGGTACACCAAGATTCCAGCCATTACCAGCGACGAG  
GCCGAGCCCTCCTCTGTCCAGTGCAGAGGTGCAAACCAAGTGTCTGAAACAAACCAAGCTGCTGCAAGCTGT  
TCACAGGCGAGTGGGGCTGCTGTCCACTCAAAAATGCTGTTTGTGTCCAGATAAGGAGCACTGTTGCC  
GCAGGGTTACACTGTGACATCTTATCCAGATCCTGCCAGAAGCTCATCATGATGCAGCTGGAGAGAGTC  
CCACTGACACCGGTGTATCTACTTGGAGCTGAAACCCAGCTCAGCCCAACAAAGCACAAAGACATCAAGT  
GCGATGACAAGACCGATTGCGGCATGATGAAACTTGTGTCAGGACTTCTGCCACTTCTGGGGCTGCTG  
TCCATCTCTAACCGGTGTGCTGTGAGGAGCATGAAACACTGCTGCCCGACCGGGTACACTGCAACAAA  
GAAGGCTCCTGCATCCAGAATCCAAGCTTTACTGGCCCAACTGGCACGTGTTCTCGCCAACAAAAAAA  
GAGCCCTAATTGTGTGAAAACACCACCTCTAAAAGTTACTAGTTTTAGTTTTTGCATGTAATGCACTAA  
TGGAGAAAAGATTCTACATTAATTTCAAAATGCTTTGTATTTAAATGACACTTTGAAAACGATTTGCACC  
TCAGTTGCTAAGATGTTTGAATCTTGAAGTTGAACGTTTTTGGTCTGAATGCACCTAATTATATAGATGA  
CCATGTGACTAATGTATTTAAGGAGTTATCTTTGTTATTCCAAGCACACTCAGTTTGTCACTTGAACCTC  
TACTCCATCCACAATAGAAAGACAATCGAAACACTCCACTTGTGAGTCACTGTTTCTTTAAGACTTGTG  
CAGCTGCCCTCTGTTGAAAAGGTTATTTCTTTATCAATAATAGTCAATCAGTCAAAGCCTGATTCAATAT  
CTTTCACTATTCTGAACATTCAGTCTGATCAATTAATGATTTTTGTGGCGTAATTACTCATTAAATCTTGG  
GTTCAATAATTTGTGCAATGGATTAGTAATCTGTGTTAATGAGGCAAAGGTGAAGAAATTCATGCTTGGG  
TCATCTTACCTGTCAAACCTGTCACATTAATCCATTAAATCAATAAAAAAGAAGTGACATTGTTAAAA

**cDNA data:**

**From:** NCBI est: GI: 253924610

**Note:** This cDNA confirms exons encoding modules 4 and 5.

GGGGAAGGTTCTGCAATCATAAAGCAGAAGGTAGAGGTGAAGGATGTTCCATGTGACGATAACATCAGCC  
TGTCCTGATGGCACCACCTGCTGTAAAACCAAGAAGGTGGCTGGGCTTGTGTCCAATGCCAGAGGCTG  
TTTGTGTGAAAGACTTCATACACTGTTGTCCAAAAGGGAAGAAATGTAACCTGGAGGCTCAAACCTGTGA  
GGACGGCCTGATCTCTGTGCCCTGGGCCAAGAAGGTTCTGCAATCATAAAGCAGAAAAGTAGAGGAGAAG  
AAAGTTCTTGTGATCACACAGCAGCCTGTCTGATAACACCACCTGCTGTAAAACGAAAAGAGGTCGCT  
GGGCTGCTGTGCAATGCCAGAGGCGGTCTGCTGCAACGATCACAAAACACTGCTGCCCGAACGGCACCAC  
CTGTGACCAGACCTCCATGTCTGCAATGGCCCATCAGGCTCAACTCCCAT

**From:** NCBI est: GI: (253937433, 253896546, 253926090, 253922782, 253884649, 253887892, 253892436,

253915043, 253915453, 253888770)

**Note:** A cDNA contig of est sequences at the 3' end of the transcript confirming exons encoding the last two modules (modules 7 and 8)

```
GGGGCTGTCTAAACAGTATAAAATGTGACAATAGCCGCACGTCATGCATAAAAAGGGGAAGTGGTGATTCC
GTGGTACACCAAGATTCCAGCCATTACCAGCGACGAGGCCGAGCCCTCTCTGTCCAGTGCGAAGGTGCA
AACCAGTGTCTGAACAAAACCAGCTGCTGCAAGCTGTTACAGGCGAGTGGGGCTGTGTCCACTCAAAA
ATGCTGTTTGTGTCCAGATAAGGAGCACTGTTGCCCGCAGGGTTACACCTGTGACGTCTTATCCAGATC
CTGCCAGAAGCTCATCATGATGCAGCTGGAGAGAGTCCCACTGACACCGGTGTATCTACTTGAGCCTGAA
CCCCAGCTCAGCCCAACAAAGCACAAAAGACATCAAGTGCATGAACAGACCGATTGCGGACATGATGAAA
CTTGTGCAGGACTTCTGCCACTTCTGGGGCTGTGTCCATCTTCTAACGCGGTGTGTGCAGCGACAT
GAAACTGTGCTGCCCAGCCGGGCACACCTGCACCAAAAGAGGCTCCTGCATCCAAAACCTCAAGCTTTAC
TGGCCCAACTGGCACGTGTTCTCGCCAACAAAAAAGAGCCCTAATTGTGTGAAAAACCCACCTCTAAA
CTGTTACTAGTTTTAGTTTTTGCATGTAATGCATAATGGAGAAAAGAAATTTACATTAATTTCAAAAATGC
TTTGTATTTAAATGACACTTTGAAAACGATTTGCACCTCAGTTGCTAAGATGTTTGAATCTTGAAGTTG
AACGTTTTGGTCTGAATGCACCTAATTATATAGATGACCATGTGACTAATGTATTTAAGGAGTTATCTTT
GTTATTTCCAAGCACACTCAGTTTTGCACTTGAACTCTACTCCATCCACAATAGAAGACAATCGAAACAC
TCCACTTGTGAGTCATCTGTTTTCTTAAAGACTTGTGCAGCTGCCTTCTGTTGAAAAGGTTATTTCTTTA
TCAATAATAGTCAATCAGTCAAAGCCTGATTCAGTATCTTTTATCATTCTGAACATTGAGTCTGATCATT
TAATGATTTTGTGGCGTAATTACTCATTAAATCTTGGGTTTATAATTTTGTGCATTGGATTAGTAATCTG
TGTTAATGAGGCAAAGGTGAAGAAAATTCATGCTTGGGTCATCTTACCCTGTCAAACCTGTCACATTATCCA
TTAAATCAATAAAAAAAGAAAGTGCATTGTTAAAAAAAAAAAAAAAAAAAAAAAAAAAAAAAAAAAAAAAAA
```

**Genomic data:**

**Note:** Genomic data (exons). From linkage group LG4

From NCBI: GI: 537083217

**Note:** The coding exons are within the section 23339707-23321661

**Coding exon 1 Exon type: sn**

**Note:** from the start codon

```
ATGCAGAAGTGGGTTGTGATCTGCTGGGCCCTGGCTGTGGTTGGTGCTGATGTGTGCCAGATGGAG
GGCTGTGTAAAGAAGGGGAAACCTGCTGCAACAGCCAGAAAACGGCTACGGGTGTTGCCGATATGAAA
C
```

**Coding exon 2 Exon type: c**

```
GCTGAGTGTGTGATGATCACATCCACTGCTGTCCAGCGGGCACAGTCTGTAATAAAGCCTTATCTGGCT
GTATTAATACCACCTGACCATCCCATGGGTGAAAAGAACCCTGCTGATCAGCCAAAACCTCTGTAAA
```

**Coding exon 3 Exon type: n\***

```
TCCTTCAGGATGATCAAGGCCACGAGAGTCAGGAAGACGACAACATCTGCCCGATCTGTCACGATGCC
CTGCTGAGTTTTCTGTCTGAAGGGTTTGACGAAGTTTGGCTGCTGTCTCTAACTCAG
```

**Coding exon 4 Exon type: c\***

```
GGAATCTCTGCCCGATGGCAAACACTGCTGCCCTGAGGGCCACGACTGCAGCTCAGACAGCCGCGCCT
GCATCAAAAAAG
```

**Coding exon 5 Exon type: n**

```
AGAGATCGTGGTTACAGTTCTATGCAGCGATGGCGTTTTCGGAGTGCCAGATGGTACCACCTGCTGTGAA
ACAACAGAAGGCAAAATGGGCATGCTGTCCACTACCAAAG
```

**Coding exon 6 Exon type: c**

```
GCCGTGTGTGCTGCGCTGACAAGATACTGCTGCTCTGAAGGAACCACATGTGATGTCGAGCATTCCAAAT
GCATTCACTCTTCTACCAAGAAAAGAGATGCCAATGTGGGCAAAGCTCCCTGCCAGAGTGAGAGCAGCTTG
GGAAAACCAGAAAAG
```

**Coding exon 7 Exon type: j**

**Note:** encodes a short addition to the module joining sequence

```
AAGTGCCAGTTGAGGCGGTGAATAACACAGGAACAGAAAACGCCCCAAAGGCACCACAGCCAATCTGCT
TCTTCCATCTG
```

**Coding exon 8 Exon type: n**

```
GCCAACGATGTTCCATGTGACGATAACATCAGCCTGTCTGATGGCACCACCTGCTGTAAAACCCAAGAAAG
```

GTGGCTGGGCTGCTGTCCAATGCCAGAG

**Coding exon 9 Exon type: cn**

GCTGTTTGTCTGTGAAGACTTCATACACTGTTGTCCAAAAGGGAAGAAATGTAACCTGGAGGCTCAAACCT  
GTGAGGACGGCTGACCTCTGTGCCCTGGGCCAAGAAGGTTCCCTGCAATCATAAAGCAGAAAGTAGAGGA  
GAAGAAAAGTTCCTTGTGATCACACAGCAGCCTGTCTGATAACACCACCTGCTGTAAAACGAAAGAAGGT  
CGCTGGGCTGCTGTCCAATGCCAGAG

**Coding exon 10 Exon type: cn**

GCGGTCTGTGCAACGATCACAAACACTGCTGCCCCGAACGGCACCACCTGTGACCAGACCTCCATGTCTCT  
GCAATGGCCCATCAGGCTCAACTCCCATGCTACAGAAAGGTACCTGCGTTCACTACTGGAGCACCTACTAC  
TGTGCAGCCTACAACCTGAGAGTCCAACAACAAGCTCTAAAGCGGAGGAGGAGGACAAAAGAAGAAGGCC  
ATGATTAGCTGTGATGCCCCACACCAGCTGCCCTCAGTTGACCACCTGCTGCTACATGAAGAAGTTTAAAA  
AGTGGGGCTGCTGCCCCGCTGCCTGAG

**Coding exon 11 Exon type: cn**

GCGGTGTGCTGTGAGGATGGGAGTCACTGTTGTCTAAACAGTATAAAATGTGACAATAGCCGCACGTTCAT  
GCATAAAAGGAGAAGTGGTGATTCCATGGTACACCAAGATTCCAGCCATTACCAGCGACGAGGCCGAGCC  
CTCCTCTGTCCAGTGCAGAGGTGCAAACCAAGTGTCTGAACAAAACAGCTGCTGCAAGCTGTTACAGGC  
GAGTGGGGCTGCTGTCCAACCTCAAAAAAT

**Coding exon 12 Exon type: cn**

GCTGTTTGTCTGTCCAGATAAGGAGCACTGTTGCCCGCAGGGTTACACCTGTGACATCTTATCCAGATCCT  
GCCAGAAGCTCATCATGATGCAGCTGGAGAGAGTCCCACTGACACCGGTGTATCTACTTGAGCCTGAACC  
CCAGCTCAGCCCAACAAAGCACAAAGACATCAAGTGCATGACAAGACCGATTGCGGACATGATGAAACT  
TGCTGCAGGACTTCTGCCACTTCTGGGGCTGCTGTCCATCTCCTAAC

**Coding exon 13 Exon type: c**

**Note:** up to the stop codon

GCGGTGTGCTGCAGCGACATGAAACACTGCTGCCCCGACCGGGTACACCTGCACCAAAAGAAGGCTCCTGCA  
TCCAGAACTCCAAGCTTTACTGGCCCAACTGGCACGTGTTCTCGCCAACAAAAAAGAGCCCTAATTGT  
GTGA

**Genomic sequence note:** A genomic sequence is not presented (see note 2 in header).

---

00011 **O. niloticus progranulin B** Short name: **O\_nilB or tilapB** Date entered: 2014-03

**Species:** *Oreochromis niloticus* (Nile tilapia)

**Taxonomy (via NCBI):** Eukaryota; Metazoa; Chordata; Craniata; Vertebrata; Euteleostomi; Actinopterygii; Neopterygii; Teleostei; Euteleostei; Neoteleostei; Acanthomorpha; Acanthopterygii; Percomorpha; Perciformes; Labroidae; Cichlidae; African cichlids; Pseudocrenilabrinae; Oreochromini; Oreochromis

**General Comment:** Two variants, X1 and X2, have been predicted from genomic sequence data. These are minor splice variants in that the granulin modules themselves are not affected.

**Protein Sequence**

MTLQMGLLCLALLGLSSALVCPDGGICQGKNTCKNTEGGYGCCPLPRAECCSDHLHCCYEGTLCDLVHE  
KCVNKTVSLPWMTRLLTTPQLEEMVKAIVCPDQVSECPDGTTCQQLPDSWGCCPLAKAVCCDRRHCCP  
EATKCDIAHLRCVSASLESFPLLVKLPARRRGNNPVSFCPDGKLSCTAFTCCLLPNGEYGCCPYPKATCC  
EDHLHCCPANMECDLKHSQCRRETVMPLMKKIPAVANDISCPDKKAFCPDLTTCKMINDTYGCCPMPN  
AVCCSDRVHCCPAGSECDLYHRTCVSTQRNPTMTLAEAAATELLKVVQRKVVHSIPCNEVACADRSTCKTL  
KGDWACCPLPQAVCCEDHLHCCPHGTICNLKSSSTCDASTGNAVTPMLGHVVPVFPLEEDGNNRCDKSTTCP  
GKSTCKTASGSWACCPLLQAVCCDDHIHCCPHGQVCNLAETCVDPWGFSPVSWLTKVPALTLEVEDE  
KCDEKTRCPWGSTCKMNSGQWACCPLPQAVCCNDHKKCCPKGYKCNVAEGTCDKPGGLSVAWLQKIPAL  
QEELGRTVSNPTRNMCDQAQTSFPRDITCCFMEKEHKWGCCPLPNAVCCCKDGNHCCPSRHTCEPHHSSCSR  
GSHVIPWFVAKVSAVTEPGAVIDVKCDNKSSCASGTTCKLKTGKWGCCPLVAVCCTDHEHCCPQGYTCN  
MQTGTCEKKQHYHRLSTIPQIEVLQSVKEAEDEEDVACDGRGEFRCSKRDTCKISATEWSSCCSPRAVC  
CFDSKHCCPAGYSCDLKAGGCTLQTLQTLWDSWFGDRKRDTPHGL\*

**Transcript:**

**Note:** No useful cDNA est sequence data available at time of entry.



**Predicted sequence:**

**Note:**

**Derivation:** NCBI GI: 542230141 XM\_003448705.2

TCAGGCGTCATGTGATATAAGTATTATCAGAGCCTGTTTGTCTTTGTGTGTTGTGGGTGTTGCAGACGCTA  
CATCAAACGGTATATGTATGTGACCGTTCAGACGAGGAGTATGCAGAAAAGTGCCCTGTGCTGATAACGA  
ATAAACTCTTTCTGCCTGCTCTCAGGATTCTGCTAATCATGACTCTGCAGATGGGGCTCTTGTGTTTGG  
CCCTGCTGGGTCTGAGCTCAGCGCTGGTCTGTCCCAGTGGAGGCATATGTCAGGGCAAAAAACCTGCTG  
CAAGAATACTGAGGGGGGATACGGATGCTGCCACTACCACGTGCAGAGTGTCTGTTAGACCACCTCCAC  
TGCTGTTACGAGGGCACGCTGTGCGATCTGGTTCATGAGAAAATGCGTCAATAAAAACAGTTTCCCTGCCGT  
GGATGACACGACTCCTGACCACACCTCAGCTCGAGGAGATGGTGAAGGCAGTCGTTTGTCCGGACCAGGT  
GTCTGAGTGTCCGGATGGCACGACTTGTGCTGCCAGTTCCTGACAGCTCCTGGGGCTGCTGCCCTTAGCC  
AAGGCGGTGTGTTGTGACGATAGGCGCCACTGCTGCCCTGAGGCAACAAAAGTGTGATATCGCTCACTTGC  
GGTGCCTCTCTGCCTCGCTGGAGTCCCTCCCCCTGCTGGTGAAGTACCTGCTAGAAGGAGAGGGAATAA  
CCCAGTATCATGCCCTGATGGGAAAACCTCAGCTGCCCAACCGCTTTCACATGCTGTCTGTACCCAACGGA  
GAGTACGGCTGCTGCCCATACCCAAAAGGCCACATGCTGTGAGGATCACCTTCACTGTTGCCCTGCCAACA  
TGGAGTGTGACCTGAAGCACTCACAGTGTAGGCGTGGCGAGACCGTCATGCCCTGATGAAGAAGATCCC  
TGCTGTAGCCAATGACATCAGTTGTCCAGACAAGAAGGCATTTTGTCTGATCTCACCACATGCTGCAAG  
ATGATCAACGACACCTACGGCTGCTGCCCGATGCCAATGCCGTCTGTTGTTCCGATCGCGTCCACTGCT  
GCCCTGCAGGCTCAGAGTGCACCTGTACCACAGGACCTGTGTGTCTACCCAGAGAAAACCCACCATGAC  
TCTGGCAGAAGCTGCGACCGAGCTCCTTAAAGTGCAGAGAAAAGTCCATTCCATCCCCTGCAACGAGTCT  
GTGGCCTGTGCTGACAGAAGCACCTGCTGTAAAACACTAAAAGGAGACTGGGCCTGCTGTCCGTTACCAC  
AGGCTGTGTGCTGTGAGGACCACCTGCACTGCTGCCCCACGGCACCATTTGTAACCTGAAAAGCTCCAC  
GTGCGACGCCTCCACAGGTAACGCCGTGACTCCCATGCTTGGACACGTGCCGGTATTTCTTTACTGGAA  
GACGGTAACAACAGGTGCGACAAGTCAACGACATGTCTGGGAAATCCACCTGCTGCAAGACTGCGAGTGT  
GCAGTTGGGCTGCTGTCCGCTGCTTCAGGCTGTTTGTGTGACGATCACATCCACTGCTGCCCTCACGG  
CCAAGTCTGCAACTTGGCAGCCGAAAACCTGCGTTGACCTTGGGGCTTCTCTCCGCCGCTCCTGGCTG  
ACAAAAGTACCAGCTCTGACCTTAGAGGTGGAGGATGAGAAAATGTGACGAGAAAACAGATGTCCGTGGG  
GCTCCACCTGCTGTAAAATGAACTCTGGACAGTGGGCCTGCTGCCCTTACCTCAGGCTGTGTGCTGCAA  
CGATCACAAGCACTGCTGCCCAAAAGGCTACAAGTGAATGTGGCCGAGGGGACCTGTGACAAAACCCGGT  
GGCCTCAGTGTGGCTGGCTGCAGAAGATCCCGCCCTGCAGGAGGAGCTCGGCCGGACTGTTTCCAATC  
CAACTCGGAACATGTGCGATGCCAGACCAGCTGTCCAGAGACACGACCTGCTGCTTCATGGAAAAGGA  
ACACAAAATGGGGCTGCTGCCCTCTGCCGAACGCTGTCTGCTGCAAAGATGGAAAACACTGCTGCCCCAGC  
AGACACACCTGTGAGCCCCACCCTCCTCCTGCTCCAGAGGTTCCCATGTTATAACCGTGGTTCCGCAAAAG  
TAAGCGCTGTAACGGAGCCGGGCGCCGTGATCGACGTTAAATGTGACAACAAGAGCAGCTGCGCTTCAGG  
GACGACCTGCTGTAAGCTGAAGACCGGAAAAGTGGGGCTGCTGCCCGTGGTCAAGGCTGTTTGTGCACT  
GACCATGAGCACTGCTGCCCTCAGGGCTACACCTGCAACATGCAGACAGGAACATGCGAGAAGAAAACAAC  
ACTACCACCGCCTCAGCACCATCCCTCAGATCGAAGTGTCTACAGTCTGTGAAGGAGGCAGAAGACGAGGA  
GGATGTGGCGTGTGACGGCAGGGGCGAGTTTCGCTGCTCCAAAACGAGACACCTGCTGTAAAGATCTCTGCC  
ACGGAGTGGAGCTGCTGCCCTCCCCAGGGCCGCTGCTGCTTTGACTCGAAGCACTGCTGTCTCTGCTG  
GGTACTCCTGCGACCTGAAGGCCGGAGGCTGCACCTTGCAGACCCAACTGACCTGGGACTCGTGGTTTTGG  
GGACCGAAAAGAGAGACTGTCCCCACGGACTCTAATCCACTGAGGTGCAATGATGATCCCAATCTTTC  
CGTTATATCTACTACTGGTGTGTTGCTGTGGACAAGAAGGGCTTCTCATGTTTCATTTTCATGGAGGTGTAT  
TCAGAGTTTTTTGCACTCTTGAGTATTTTTGAGTTTTGTGTGGTGGGGGGGGCATTGGTCCGCATATGC  
AGGAAAAACATCTGTTTAAATTGCTTTTTGCCATTGAAGGAAATTTAGTGAAGTTGAAGTAGATTTCAAGG  
GGGAAGCAGGTCAGACCTAGCCTGGATGCTGGTTGAAAATATTTATTGCACTCCTTCAAAAACACTCCAC  
ATTTAGGCTTTACAGTGCCTGTTTAAAGGATTACTCCGGTCTGTTTCAACCTGCCGTGTTATCTGTTAA  
TGTGAGATCTGTCAATTAATGCACTCTGTAGTTTGTCTTATAGGTAACAAAATCCCATTTGAAAATAAACTTC  
AATGAATTTGTCTCTTTTGAAGTGCATTGTTTCTGCTGACTTTTTTTTTCTTTCTTTTTCTTTTCAGAG  
TAGCTTTGCACGAGTGAACCTAAAATAATGAACCCACACAGGGAGCTTGGCACCTGCTCTGTTAATCCTG  
TCTGAAAAGTGGCTGCTTCACTCCTTTAGCTCCATGTATCTTCTGATTGGCTGCCAAAACCTTTAAACAAC  
AGGTGGGTGCGGCGGGCGGAGAAAAGCACTTTTAAACCTTTAAGATAGAGGAGCAGGTTTCTGTAAGCTTT  
TGTACCAAGGTTGACAGTTCCTTTGAGTTTGTGGAACAAAATCTTATGCATATTTTGTGATGGCATTGTTG  
TACTTTACGAAAAACTCCCTGATCATTAGTGTTTAAACGTGAGTGCACAGAGCTGGTCTACTTCTCTGG  
AAGAGAATCATGAATGTACAAAACGCTTTTTTGTGAGCAACATTTCTAAATAATCTGACTTTAACCTTT  
CCTGATAGTTTATTAGTAAAATGGCAAAGCCACAAAATTAACCACTTTAACAGTGAAGAAACCACAAAATCT  
GAACAAAATAACAAGTAGCCTTTAGATCCCCCAGTGTCTCTGAATTTGTTAATTTGACTGTTTCAGGC  
TTAGAGGATGAAAATCGAGCTGTCAGATTAGAATGCTGGGATTGTGGGCGTAGACATTCACCTTCATGGTA  
AAGTGGTTTTGGTGTCTGGGGACTTGATTTTTCACTGACTCTTAAGAGTTTAAAAAATGAAATCATAACA  
GCAGACTGTCAAAACATTATTGTTGTACATACAAACCTGAAATGTAGGCGATCCAAAAGTCTGTAAAGGTGAG

AGGAAAATGACGGGACACGAACGAGCATTAAAGAACAGTTTGTGCCTTCTTCAGTAAGAGTTACCTGTATC  
CTTTGGAAAAGTCTTTTGTGTCAGTTGTAACATTGATTTGCATCTTTGTCTTTATGGAAAACGTAACA  
CAGGCGCTCAGGAGAATCATGTGGAGTTACTTGTGAATTGAGACTTGGTCAGTGTACAGTTGGTAATAT  
GTTGTTTGTAGATTTCAGGAGTTCCATAAAAAGCTGAACTCTCTTAAACTGAAAGTCATTTCAATGATTTCTA  
AATGACTGTCATGTA AAAATGTTTTACAGATTGGCTCCATGTGAAAATAAAAAGTTCA TTTTGCTCCTGTCA

**cDNA data:**

**cDNA sequence data:** No cDNA data (or empty cDNA entry).

**Genomic data:**

**Note:** Genomic data (exons). tilapB coding exons are in gil537083121:c24916646-24896014 *Oreochromis niloticus* isolate 000638D3DF linkage group LG8-24

From NCBI: GI: 537083121 (c24916646-24896014)

**Coding exon 1 Exon type: sn**

**Note:** From start codon

ATGGGGCTCTTGTGTTTGGCCCTGCTGGGTCTGAGCTCAGCGCTGGTCTGTCCCGATGGAGGCATATGTC  
AGGGCAAAAACACCTGCTGCAAGAATACTGAGGGGGGATACGGATGCTGCCCACTACCACGT

**Coding exon 2 Exon type: c**

GCAGAGTGCTGTTTCAGACCACCTCCACTGCTGTTACGAGGGCACGCTGTGCGATCTGGTTCATGAGAAAT  
GCGTCAATAAAAACAGTTTCCCTGCCGTGGATGACACGACTCCTGACCACACCTCAG

**Coding exon 3 Exon type: n**

CTCGAGGAGATGGTGAAGGCAGTCGTTTGTCCGGACCAGGTGTCTGAGTGTCCGGATGGCAGACTTGCT  
GCCAGCTTCTGACAGCTCCTGGGGCTGTGCCCTTAGCCAAG

**Coding exon 4 Exon type: c**

GCGGTGTGTTGTGACGATAGGCGCCACTGCTGCCCTGAGGCAACAAAGTGTGATATCGCTCACTTGCGGT  
GCGTCTTGCCCTCGCTGGAGTCCCTCCCTGCTGGTGA AACTACCTGCTAGAAGGAGAGGGAATAACCC  
AG

**Coding exon 5 Exon type: n**

TATCATGCCCTGATGGGAAACTCAGCTGCCCAACCGCTTTCACATGCTGTCTGCTACCCAACGGAGAGTA  
CGGCTGCTGCCATAACCAAAG

**Coding exon 6 Exon type: c**

GCCACATGCTGTGAGGATCACCTTCACTGTTGCCCTGCCAACATGGAGTGTGACCTGAAGCACTCACAGT  
GTAGGCGTGGCGAGACCGTTCATGCCCTGATGAAGAAGATCCCTGCTGTAGCCAATGACA

**Coding exon 7 Exon type: n**

TCAGTTGTCCAGACAAGAAGGCATTTTGTCTGATCTCACCACATGCTGCAAGATGATCAACGACACCTA  
CGGCTGCTGCCCGATGCCCAAT

**Coding exon 8 Exon type: c**

GCCGTCTGTTGTTCCGATCGCTCCACTGCTGCCCTGCAGGCTCAGAGTGCACCTGTACCACAGGACCT  
GTGTGCTTACCCAGAGAAACCCACCATGACTCTGGCAGAAGCTGCGACCGAGCTCCTTAAAGTGCAGAG  
AAAAG

**Coding exon 9 Exon type: n**

TCCATTCCATCCCCTGCAACGAGTCTGTGGCCTGTGCTGACAGAAGCACCTGCTGTAAAACACTAAAAGG  
AGACTGGGCCTGCTGTCCGTTACCACAG

**Coding exon 10 Exon type: cn**

GCTGTGTGCTGTGAGGACCACCTGCACTGCTGCCCCACGGCACCATTTGTAACCTGAAAAGCTCCACGT  
GCGACGCCTCCACAGGTAACGCCGTGACTCCCATGCTTGGACACGTGCCGGTATTTCTTTACTGGAAGA  
CGGTAACAACAGGTGCGACAAGTCAACGACATGTCTGGGAAATCCACCTGCTGCAAGACTGCGAGTGGC  
AGTTGGGCCTGCTGTCCGCTGCTTCAG

**Coding exon 11 Exon type: cn**

GCTGTTTGTGCTGACGATCACATCCACTGCTGCCCTCACGGCCAAGTCTGCAACTTGGCAGCCGAACTT  
GCGTTGACCCTTGGGGCTTCTCTCCGCCGTCTCTGGCTGACAAAGGTACCAGCTCTGACCTTAGAGGT

GGAGGATGAGAAATGTGACGAGAAAACCAGATGTCCGTGGGGCTCCACCTGCTGTAAAATGAACTCTGGA  
CAGTGGGCTGCTGCCCTTTACCTCAG

**Coding exon 12 Exon type: cn**

GCTGTGTGCTGCAACGATCACAAGCACTGCTGCCCCAAAGGCTACAAGTGCAATGTGGCCGAGGGGACCT  
GTGACAAACCCGGTGGCCTCAGTGTGGCTGGCTGCAGAAGATCCCGGCCCTGCAGGAGGAGCTCGGCCG  
GACTGTTTCCAATCCAACCTCGGAACATGTGCGATGCCAGACCAGCTGTCCAGAGACACGACCTGTGCTG  
TTCATGGAAGGAAACACAAATGGGGCTGCTGCCCTCTGCCGAAAC

**Coding exon 13 Exon type: cn**

GCTGTCTGCTGCAAAGATGGAAAACCACTGCTGCCCCAGCAGACACACCTGTGAGCCCCACCACTCCTCCT  
GCTCCAGAGGTTCCCATGTTATACCGTGGTTCGCCAAAAGTAAGCGCTGTAACGGAGCCGGGGCGCCGTGAT  
CGACGTTAAATGTGACAACAAGAGCAGCTGCGCTTCAGGGACGACCTGCTGTAAGCTGAAGACCGGAAAAG  
TGGGGCTGCTGCCCGCTGGTCAAG

**Coding exon 14 Exon type: cn**

GCTGTTTGTGCACTGACCATGAGCACTGCTGCCCTCAGGGCTACACCTGCAACATGCAGACAGGAACAT  
GCGAGAAGAAAACAACACTACCACCGCTCAGCACCATCCCTCAGATCGAAGTGCTACAGTCTGTGAAGGA  
GGCAGAAGACGAGGAGGATGTGGCGTGTGACGGCAGGGGCGAGTTTCGCTGCTCCAAACGAGACACCTGC  
TGTAAGATCTCTGCCACGGAGTGGAGCTGCTGCCCTCCCCCAGG

**Coding exon 15 Exon type: c**

**Note:** up to stop codon

GCCGTCTGCTGCTTTGACTCGAAGCACTGCTGTCTGCTGGGTACTCCTGCGACCTGAAGGCCGGAGGGT  
GCACCTTGACAGACCAACTGACCTGGGACTCGTGGTTTTGGGGACCGAAAGAGAGACACTGTCCCCACGG  
ACTCTAA

**Genomic sequence note:** A genomic sequence is not presented (see note 2 in header).

---

00012 **O. niloticus progranulin C1** Short name: **O\_nilC1 or tilapC1** Date entered: 2014-03

**Species:** *Oreochromis niloticus* (Nile tilapia)

**Taxonomy (via NCBI):** Eukaryota; Metazoa; Chordata; Craniata; Vertebrata; Euteleostomi; Actinopterygii; Neopterygii; Teleostei; Euteleostei; Neoteleostei; Acanthomorpha; Acanthopterygii; Percomorpha; Perciformes; Labroidae; Cichlidae; African cichlids; Pseudocrenilabrinae; Oreochromini; Oreochromis

**General Comment:** Four Nile tilapia small form sequences are in the database. All within 56 kB on GI: 537082957 Oreochromis niloticus isolate 000638D3DF linkage group LG22.

**Protein Sequence**

MSRLTLWLSVGVFMWGFASGLITCPDGSTCSIDITCCKTERGYGCCQYPKAVCCADMLHCCPSGYRCNLV  
TQLCEKLDQPWLSIPMVKKDAAQKLTYPFLYKPALPSVPAFVIMPSEDTESMNEIPEPALTHVGSPEAQV  
IRCDLSLHYCQGGMSSCQASTGQWNCPPYPLGQCADGLHCCEYGYTCDASSLKCRNSYS\*

**Transcript:**

**Note:** No useful cDNA data.

**Predicted sequence:**

**Note:**

**Derivation:** NCBI: XM\_003457268.2 GI:542252113

ACAGAAGTGCTGTGATGTGAAGTCAAGCTCTCAGCTGCTCCTCAGTGGGCGGGTCTTACCTGCACTATAAA  
AAAGCCATGCAAGTTTTCAGTGATAGGGGAAGTGTGAAATATATGACAGGAAACTGTTGACTCTCTTCCCA  
ATCTGAAGATGTGCGAGGCTCACTCTGTGGTTGTCAGTCGGGGTGTATGTGGGGATTTGCTTCTGGCTT  
AATCACGTGTCTGATGGGAGTACTTGTCTCAGACATCGATACCTGCTGCAAGACTGAGCGTGGATATGGC  
TGCTGTGATATCCAAAAGCGGTGTGCTGCGCAGACATGCTCCACTGCTGTCCGTCAGGGTATCGCTGTA  
ACCTGGTGACACAGCTGTGTGAGAACTGGACCAGCCGTGGCTGAGCATTCCCATGGTGAAGAAGGATGC  
TGCACAGAACTCACATATCCTTTCTCTATAAGCCAGCGCTGCCTTCAGTACCTGCCTTTGTCTATCCCT  
ATGTGACAGAGGACACAGAGAGCATGAATGAGATACCAGAGCCAGCTCTAACACACGTCGGCTCCCCTGAGG  
CCCAAGTCATTGCTGTGATTCCCTACATTACTGCCAGGGGGGATGTCTTGTGCTGCCAGGCATCCACAGG  
CCAGTGGAACTGCTGTCCCTACCCACTGGGCCAGTGTGTGTCAGATGGTCTGCACTGCTGTGAGTATGGA  
TACACCTGTGATGCCCTCCTCTTGAATGCAGAAATCTTACTCTTGAGATTTCTCAGGGCTGCACGAAAT

GATGTTGAAACACGATGCTGAATGTTGAAACTGCACTGTAACAGTTTAGATCTGTTTTATATTTTTTTA  
AAATTTTTTAAATACTGTTACTTCAAGATTTGTCAAGATTTTGTGAAAAATTATTACACACACTGCCACA  
TCTGAGATAGAAGCCGATCAGCCTCACAAGAAGACAGCGAGCGGGCAATTGATGTTATATCCACGTAAGA  
TTACTTTAAGTATTCGTTGGCTGTTTTGTGTTTAAATTGATGCTGCTGCGTCACTGGACAGTCACCATTT  
AACTTCACAAATTAGCTTCAAAAAGATTTCTGCAACCATTTATTTCCACTGAGGTCATGTTGAAAAATGTC  
TAATGCTGGATTCTTTTCATAAACTGAAAAATCAAAGGCTTTTTCTGCTATTTTTCAAGTCAAATGTGGC  
GTTTTGTATTGAAAAGTTAAAAACATAAGAATATTTCCAAATAAAAAATGATAGAAATGTGAGTTTTGATG  
CCGCAAAATGTTGGTGTGTTGGTGTGACTGGTTGCAAGGTCAGACTGCCACATAAAGAAGTGGAGGACTG  
GAAGGTGAAAGCTTTTTAAAAAAAATTTATTCATTTTTGTGTTTTATTCTTTCTTTTACTTTATTTGT  
CTCCATTAACAATATAACTTGTGACCACCTGGATATAGCAGCAGACATGCAGAGTTTGATACAAATCAG  
GCACCACAGCAGGGTTTTCTGCGGGTGGCAGCAGATTTAGAATTATGGAGAAATGAAGAAGCTGATGGTGC  
AACACACTTAGATGAGGAAAAGACGGTAACACAATAGTAATGGAGGAGGAATGGTAAAGTTATGGTAAAGAA  
AAAAAAAATAGGGAAGTGAACAAGACAGGCTCCATTTTACAGCCAACACTCAAAAAACATGTCAAAAGG  
AAGAAGTGTGGCAATAACCAGTTAAGACTGGGTCTATATGGAGAGAAAAGTCTTACAAAAGTGTAAACTAA  
GATTTCCAGTGTGCAGTGATTTGTGTGCATTTTTTTTTTTTTTTGAGAGAGAGAGATTCATAGATTTTTTATT  
TTGAGCTTGGATTAATAATAAAGACATTAACACAGTGTCTGACCGTAGACACAGTCTTAATATAAGTTA  
AACTTAGTTAAGTTCAGTGAAGTAGGGTTGGTTTTGGTCTTAAAAAAAACACTACATTTATGTATATATTGCT  
TACACAAGATTAATAAAAACCTTAACACCATAA

**cDNA data:**

**cDNA sequence data:** No cDNA data (or empty cDNA entry).

**Genomic data:**

**Note:** Genomic data (exons).

From NCBI: NC\_022219.1 GI:537082957 (25024046..25028454)

**Note:** NC\_022219 REGION: 25024046..25028454

**Coding exon 1 Exon type: sn**

ATGTGCGAGGCTCACTCTGTGGTTGTCAGTCGGGGTGTATGTTGGGGATTTGCTTCTGGCTTAATCACGT  
GTCTGATGGGAGTACTTGTCTCAGACATCGATACCTGCTGCAAGACTGAGCGTGGATATGGCTGCTGTCA  
GTATCCAAAA

**Coding exon 2 Exon type: c**

GCGGTGTGCTGCGCAGACATGCTCCACTGCTGTCCGTCAGGGTATCGCTGTAACCTGGTGACACAGCTGT  
GTGAGAACTGGACCAGCCGTGGCTGAGCATTCCCATGGTGAAGAAGGATGCTGCACAGAACTCACATA  
TCCTTTCCTCTATAAGCCAGCGTGCCTTCAGTACCTGCCTTTGTTCATCCCTATGTCAGAGGACACAGAG  
AGCATGAATGAG

**Coding exon 3 Exon type: n**

ATACCAGAGCCAGCTCTAACACACGTCGGCTCCCTGAGGCCCAAGTCATTGCTGTGATTCCCTACATT  
ACTGCCAGGGGGGATGCTTGTGCTGCCAGGCATCCACAGGCCAGTGGAACTGCTGTCCCTACCCACTG

**Coding exon 4 Exon type: c**

GGCCAGTGTGTGCAGATGGTCTGCACTGCTGTGAGTATGGATACACCTGTGATGCCTCCTCCTTGAAAT  
GCAGAAATTCTTACTCTTGA

**Genomic sequence note:** A genomic sequence is not presented (see note 2 in header).

---

00013 **O. niloticus progranulin C2** Short name: **O\_nilC2 or tilapC2** Date entered: 2014-03

**Species:** *Oreochromis niloticus* (Nile tilapia)

**Taxonomy (via NCBI):** Eukaryota; Metazoa; Chordata; Craniata; Vertebrata; Euteleostomi; Actinopterygii; Neopterygii; Teleostei; Euteleostei; Neoteleostei; Acanthomorpha; Acanthopterygii; Percomorpha; Perciformes; Labroidei; Cichlidae; African cichlids; Pseudocrenilabrinae; Oreochromini; Oreochromis

**General Comment:** Incomplete genomic data and incomplete cDNA data for this small-form progranulin gene. Four Nile tilapia small form sequences are in the database. All within 56 kB on GI: 537082957 Oreochromis niloticus isolate 000638D3DF linkage group LG22.

**Protein Sequence**

MLRITLCLSFVGLWGFASCSITCPDGTCPNTATCCKAKIGFACCPHAHAMCCADLVHCCPSGYRCNLV

TMKCQKLDQPWLTIIPMVKKEAAEKPNTPELSGTPLQELKESQVPDQIKKTMVYCDSTYTYCPDGTTCRHP  
KGGWLCCPYSPGKCCLDGYHCCPIGFDCDHTYTHCVREKLTYPFLRKPAPVPSAPASLIP...

### Transcript:

**Note:** Prediction from genomic data is incomplete. It stops in the second coding exon and provides a prediction up to just beyond the first granulin module. There is an EST sequence which displays an odd splice from just after the signal peptide coding to the next exon. But this cDNA sequence continues through the code for the second granulin module. It does not reach the stop codon, but is so similar to tilapC3 that we can expect just 8 more codons and a similar sn-cn-c exon structure.

### Predicted sequence:

**Note:** Incomplete prediction based upon a combination of incomplete genomic and cDNA data. The stop codon is expected to be 8 codons beyond this prediction.

**Derivation:** NCBI: GI:537082957 from 25049779-25050482 and est GI:253894390.

ATGTTGAGGATCACTCTGTGTTTGTCAATTCGGTGTGTTTCTGTGGGGATTTGCTTCATGCTCTATCACAT  
GTCTGATGGGAGTACTTGTCCAAACACCGCCACCTGCTGCAAGGCTAAAAATCGGCTTTGCCTGCTGTCC  
CCATGCACATGCCATGTGCTGTGCCGACCTGGTCCACTGCTGCCCTTCAGGATATCGCTGTAACCTGGTT  
ACCATGAAAATGTCAGAAATTAGACCAGCCGTGGCTGACCATAACCCATGGTGAAGAAGGAGGCTGCGGAGA  
AACCAACACCCCTGAACTGTCTGGAACCTCCACTCCAGGAGCTTAAAGAGAGCCAGGTCACAGATCAAAAT  
AAAGAAAACAATGGTCTACTGTGACAGTTACACCTACTGTCTGATGGCACTACTTGTGTCAGACACCCAA  
AAAGGAGGCTGGCTCTGTTGTCCCTACTCTCCTGGCAAATGTTGTCTGGATGGCTACCCTGCTGTCCAA  
TTGGATTTGACTGTGACCATACTACACGCACTGTGTGAGGGAAAAACTCACATATCCTTTCTCCGCAA  
GCCAGCAGTGCCTTCAGCACCTGCCTCCCTCATCCCA

### cDNA data:

**From:** NCBI est: GI:253894390

**Note:** This cDNA sequence not reliable for the beginning of the transcript. Apparent splice donor artifact within the first coding exon.

GGGGAGGGAAAAGCGTGAAAAGGCATCACAGGAAGCTGTTGAATTTCTTCACTATCTAAAGATGTTGAAGAT  
CACTCTTCTGTGTTTGTCAATTCGGTGTGTTTTGTGGGGATTTGCTTCATGCTCTATCACACGTCCTGAT  
GCCATGTGCTGTGCCGATCTGCTCCACTGCTGCCCTTCAGGATATCGCTGTAACCTGGTTACCATGAAAAT  
GTCAGAAAATTAGACCAGCCGTGGCTGACCATAACCCATGGTGAAGAAGGAGGCTGCGGAGAAAACCAACAC  
CCCTGAACTGTCTGGAACCTCCACTCCAGGAGCTTAAAGAGAGCCAGGTCACAGATCAAAATAAAGAAAACA  
ATGGTCTACTGTGACAGTTACACCTACTGTCTGATGGCACTACTTGTGTCAGACACCCAAAAGGAGGCT  
GGCTCTGTTGTCCCTACTCTCCTGGCAAATGTTGTCTGGATGGCTACCCTGCTGTCCAATTGGATTTGA  
CTGTGACCATACTACACGCACTGTGTGAGGGAAAAACTCACATATCCTTTCTCCGCAAGCCAGCAGTG  
CCTTCAGCACCTGCCTCCCTCATCCCA

### Genomic data:

**Note:** Genomic data (exons). Incomplete: The second coding exon is interrupted by a gap of about 4 kb which would contain the rest of the gene.

From NCBI: NC\_022219.1 GI:537082957 (25049779..25050574)

**Note:** NC\_022219 REGION: 25049779..25050574

#### Coding exon 1 Exon type: sn

**Note:** from the start codon

ATGTTGAGGATCACTCTGTGTTTGTCAATTCGGTGTGTTTCTGTGGGGATTTGCTTCATGCTCTATCACAT  
GTCTGATGGGAGTACTTGTCCAAACACCGCCACCTGCTGCAAGGCTAAAAATCGGCTTTGCCTGCTGTCC  
CCATGCACAT

#### Coding exon 2 Exon type: cn

**Note:** Incomplete. The cn exon type is expected based upon similarity with tilap3

GCCATGTGCTGTGCCGACCTGGTCCACTGCTGCCCTTCAGGATATCGCTGTAACCTGGTTACCATGAAAAT  
GTCAGAAAATTAGACCAGCCGTGGCTGACCATAACCCATGGTGAAGAAG...

#### Coding exon 3 Exon type: c

**Note:** Yet to be sequenced. The c exon type is expected based upon similarity with tilap3. Expected to be the final coding exon.

...

**Genomic sequence note:** A genomic sequence is not presented (see note 2 in header).

00014 **O. niloticus progranulin C3** Short name: **O\_nilC3 or tilapC3** Date entered: 2014-03

**Species:** *Oreochromis niloticus* (Nile tilapia)

**Taxonomy (via NCBI):** Eukaryota; Metazoa; Chordata; Craniata; Vertebrata; Euteleostomi; Actinopterygii; Neopterygii; Teleostei; Euteleostei; Neoteleostei; Acanthomorpha; Acanthopterygii; Percomorpha; Perciformes; Labroidae; Cichlidae; African cichlids; Pseudocrenilabrinae; Oreochromini; Oreochromis

**General Comment:** Four Nile tilapia small form sequences are in the database. All within 56 kB on GI: 537082957 Oreochromis niloticus isolate 000638D3DF linkage group LG22.

### Protein Sequence

MLRITLCLSFVFLWGFASSSITCPDGSSTCSDSATCCKAKIGFGCCPFPNAMCCADLLHCCPSGYRCNLV  
TMNCEKLDQPWLTIPMVKKEAAEKPAPELPGTPLQELKESQVPDPIKSSVVYCDSTYTYCPDGTTCRRHP  
QGGWTCPPYSPGKCCLDGYHCCPIGFDCDRYTHCVREKLTYPFLRKPAPVPSAPASLIPTSEDKEN\*

### Transcript:

**Note:** EST data are good for tilapC3 except for the end of the coding sequence. That is why the predicted sequence is also presented.

### Predicted sequence:

**Note:** The only cDNA sequence covering the end of the coding sequence has an extra G compared with the sequence predicted from the genomic data, which effects a frame shift at the fifth codon before the more reliably predicted stop.

**Derivation:** NCBI: GI: 525343820 NM\_001279700.1

AACACAGGAAGCTGCTGAATTTCTTCACTGCCTAAAGATGTTGAGGATCACTCTGTGTTTGTTCATTCGGT  
GTGTTTCTGTGGGGATTTGCTTCATCCTCTATCACATGTCTGATGGGAGTACTTGTTCAGACTCCGCCA  
CCTGCTGCAAGGCTAAAAATCGGCTTTGGCTGCTGCCCATTTCCAAATGCCATGTGCTGTGCCGATCTGCT  
CCACTGCTGCCCTCAGGATATCGCTGTAACCTGGTTACCATGAATTGTGAGAAAATTAGACCAGCCGTGG  
CTGACCATACCCATGGTGAAGAAGGAGGCTGCGGAGAAAACCAGCCCCACCTGAACTGCCTGGAACCTCCAC  
TCCAGGAGCTTAAAGAGAGCCAGGTCCAGATCCAATAAAGAGTTTCACTGGTCTACTGTGACAGTTACAC  
CTACTGTCTGATGGCACTACTTGTGTCAGACACCCACAAGGAGGCTGGACCTGTTGTCCCTACTCTCCT  
GGCAAATGTTGTCTGGATGGTACCCTGTTGTCCAATTGGATTTGACTGTGACCCGACCTACACGCACT  
GTGTGAGGGAAAACTCACATATCCTTTCCCTCCGCAAGCCAGCAGTGCCTTCAGCACCTGCCTCCCTCAT  
CCCAACTTCAGAGGACAAAAGAAACTAGGAGAAAGGACACAGGAAGCAGATTTTTCAGCTGCTGTGACTAT  
AGATGTACCTGCAACCCCTCCTGCGTTATGGTAAACACATGCTGAGATGGCTTTAAAGTCCACTGTGATAG  
ATTTTTTTGGTCATTTTTGTTAAAAATTTGTCCTAAAAATCTTTTTTGGCATGCTGAAGAATAGTACACAGG  
TC

### cDNA data:

**From:** NCBI est: contig from GI: (253904238, 253845176, 253882775, 253893385, 253932238, 253850426, 253904269, 253895156, 253829805, 253878523, 253836585, 253856859, 327414295, 327414093)

**Note:** In this cDNA contig, the last 214 bases are from only one sequence(gi:327414093).

GGGAAAAGTGTGAAAGGCAACACAGGAAGCTGCTGAATTTCTTCACTGCCTAAAGATGTTGAGGATCACT  
CTGTGTTTGTTCATTCGGTGTGTTTCTGTGGGATTTGCTTCATCCTCTATCACATGTCTGATGGGAGTA  
CTTGTTCAGACTCCGCCACCTGCTGCAAGGCTAAAAATCGGCTTTGGCTGCTGCCCATTTCCAAATGCCAT  
GTGCTGTGCCGATCTGCTCCACTGCTGCCCTTCGGGATATCGCTGTAACCTGGTTACCATGAATTGTGAG  
AAATTAGACCAGCCGTGGCTGACCATACCATGGTGAAGAAGGAGGCTGCGGAGAAAACCAGCCCCACCTG  
AACTGCCTGGAACCTCACTCCAGGAGCTTAAAGAGAGCCAGGTCCAGATCCAATAAAGAGTTTCACTGGT  
CTACTGTGACAGTTACCTACTGTCTGATGGCACTACTTGTGTCAGACACCCACAAGGAGGCTGGACC  
TGTTGTCCCTACTCTCCTGGCAAATGTTGTCTGGATGGTACCCTGTTGTCCAATTGGATTTGACTGTG  
ACCGCACCTACACGCACTGTGTGAGGGAAAACTCACATATCCTTTCCCTCCGCAAGCCAGCAGTGCCTTC  
AGCACCTGCCTCCCTCATCCCAACTTCAGGAGGACAAGGAAAAGTAAAGGAGGGGACACAGGGAAGGCA  
GGATTTTTTCAGCTGCTGTGACTAATAGATGGTACCTGCAACCCCTTCTGGCGTTATGTTACCACAATGC  
TGAAAATGGGCTTTAAAGTCCACTGGTATAGAAATTTTTTTGGGTCATTTTGNAAAAANTTGTGCCTAA  
GATCTTTTTGGCCATGCTTGAAGAA

### Genomic data:

**Note:** Genomic data (exons).

From NCBI: NC\_022219.1 GI:537082957 (25068923..25071220)

**Note:** NC\_022219 REGION: 25068923..25071220

**Coding exon 1 Exon type: sn**

**Note:** from start codon

```
ATGTTGAGGATCACTCTGTGTTTGTCAATTCGGTGTGTTTCTGTGGGGATTTGCTTCATCCTCTATCACAT
GTCCTGATGGGAGTACTTGTTCAGACTCCGCCACCTGCTGCAAGGCTAAAAATCGGCTTTGGCTGCTGCC
ATTTCCAAAT
```

**Coding exon 2 Exon type: cn**

```
GCCATGTGCTGTGCCGATCTGCTCCACTGCTGCCCTCAGGATATCGCTGTAACCTGGTTACCATGAATT
GTGAGAAATTAGACCAGCCGTGGCTGACCATACCCATGGTGAAGAAGGAGGCTGCGGAGAAACCAGCCCC
ACCTGAACTGCTGGAACTCCACTCCAGGAGCTTAAAGAGAGCCAGGTCCAGATCCAATAAAGAGTTCA
GTGGTCTACTGTGACAGTTACACCTACTGTCTGATGGCACTACTTGTGCAGACACCCACAAGGAGGCT
GGACCTGTTGTCCCTACTCTCCT
```

**Coding exon 3 Exon type: c**

**Note:** to stop codon

```
GGCAAATGTTGTCTGGATGGCTACCACTGTTGTCCAATTGGATTTGACTGTGACCGCACCTACACGCACT
GTGTGAGGGAAAACTCACATATCCTTTCCCTCCGCAAGCCAGCAGTGCCCTTCAGCACCTGCCTCCCTCAT
CCCAACTTCAGAGGACAAAAGAAAACTAG
```

**Genomic sequence note:** A genomic sequence is not presented (see note 2 in header).

---

00015 **O. niloticus progranulin C4** Short name: **O\_nilC4 or tilapC4** Date entered: 2014-03

**Species:** *Oreochromis niloticus* (Nile tilapia)

**Taxonomy (via NCBI):** Eukaryota; Metazoa; Chordata; Craniata; Vertebrata; Euteleostomi; Actinopterygii; Neopterygii; Teleostei; Euteleostei; Neoteleostei; Acanthomorpha; Acanthopterygii; Percomorpha; Perciformes; Labroidae; Cichlidae; African cichlids; Pseudocrenilabrinae; Oreochromini; Oreochromis

**General Comment:** Four Nile tilapia small form sequences are in the database. All within 56 kB on GI: 537082957 Oreochromis niloticus isolate 000638D3DF linkage group LG22.

### Protein Sequence

```
MSGITLWLSVGMFVWGFASCSITCPDESLCPDDCTCCKTAHGYSCCLYPNAMCCADLRHCCPSGYRCNLV
TMKQKQLDQPWLTIPMVKKEAAEKPAPELPGSPLQELKESRVPDQIKSSVVHCDSTYTYCPDGTTCCRHP
KGGWFCCPYSPGKCLDGYHCCPFLDCDHTYTHCLREKLTYPFLYKPALPSAPASPIPKAKESRRANSA
*MNDLCEHGCSHSPPPSHAENSSLPLGHPRITETCLNVLWLF
```

### Transcript:

**Note:** No useful cDNA data.

### Predicted sequence:

**Note:**

**Derivation:** NCBI: XM\_005462011.1 GI:542252117

```
GAGAAAGCTGCTGAAGCTCTTCACTTGTGAAAGATGTCGGGGATCACTCTGTGGCTGTCAGTTGGTATGTT
TGTGTGGGGATTTGCTTCATGCTCCATCACATGTCCTGATGAGAGTCTTTGTCCAGATGACTGCACCTGC
TGCAAGACTGCCCATGGATATAGCTGCTGTCTATATCCAAATGCCATGTGCTGTGCTGATCTGCGCCACT
GCTGCCCTTCGGGATATCGCTGTAACCTGGTTACCATGAAATGTCAGAAATTAGACCAGCCGTGGCTGAC
CATACCCATGGTGAAGAAGGAGGCTGCGGAGAAAACCAGCCCCACCTGAACTGCCTGGATCTCCACTCCAG
GAGCTTAAAGAGAGCCGCTCCAGATCAAAATAAAGAGTTTCAGTGGTCCACTGTGACAGTTACACCTACT
GTCCTGATGGCACTACCTGCTGCAGACACCCAAAAGGAGGCTGGTTCTGTTGTCCCTACTCTCCCGGGAA
ATGTTGTCTCGATGGATAACCACTGCTGTCCATTTGGATTGGACTGTGATCACACCTACACGCACTGTCTG
AGGGAAAAACTCACATATCCCTTCTCTATAAGCCAGCGCTGCCTTCAGCACCTGCTTCTCCCATCCCAA
AGGCAAAGGAAAGTAGGAGGGCCAAATCTGCGTAGATGAACGATCTCTGTGAGCATGGATGTAGCCACAG
CCCTCCTCCTTCTCATGCAGAAAACCTCGAGCCTACCTTGGGACATCCTAGGATCACAGAAACATGCCTA
AATGTGCTGTGGCTATTCTTTTGAATAGTTTTTTCTTTTATAAGAGTTTCTTATTATTATTATTATGGTC
AGAAATCTGTTGAAATGCATTTTGCATCACATCTGATATATAATCAGATCAGTCTTGGGAGAAAGACAGTT
CCTGGACAAATGATCTGACAAGTGCACAAGATTGTTTTTAATGTTTGTGTTTCTTTGCTTTTACTAGACTAA
TGGGTGTGCATAGTTGGCTGTTGCAATGGACAGTCACCAGTCATCCTAACAAACCAGCTTTGCAAGATTT
```

CCTGCTGCCTGCGTAACTAGATATCACTGAATGTAGACTAGAAAAATAAAATGTAAGGCTGAATGATTATT  
AAAATGTCTTTATTGTTTCTTTCTTTGTTTGAATGTTTTCTATCTTGTGTCACCAATAAAGACCTGTTGT  
GACCTGTGTAAA

**cDNA data:**

**cDNA sequence data:** No cDNA data (or empty cDNA entry).

**Genomic data:**

**Note:** Genomic data (exons).

From NCBI: NC\_022219.1 GI:537082957 (25077392..25079923)

**Note:** NC\_022219 REGION: 25077392..25079923

**Coding exon 1 Exon type: sn**

**Note:** from start codon

ATGTCGGGGATCACTCTGTGGCTGTCAGTTGGTATGTTTGTGTGGGGATTTGCTTCATGCTCCATCACAT  
GTCTGATGAGAGTCTTTGTCCAGATGACTGCACCTGCTGCAAGACTGCCCATGGATATAGCTGCTGTCT  
ATATCCAAAT

**Coding exon 2 Exon type: cn**

GCCATGTGCTGTGCTGATCTGCGCCACTGCTGCCCTTCGGGATATCGCTGTAACCTGGTTACCATGAAAT  
GTCAGAAATTAGACCAGCCGTGGCTGACCATACCCATGGTGAAGAAGGAGGCTGCGGAGAAACCAGCCCC  
ACCTGAACTGCCTGGATCTCCACTCCAGGAGCTTAAAGAGAGCCGCGTCCCAGATCAAATAAAGAGTTCA  
GTGGTCCACTGTGACAGTTACACTACTGTCTGATGGCACTACCTGCTGCAGACACCCAAAAGGAGGCT  
GGTCTGTTGTCCCTACTCTCCC

**Coding exon 3 Exon type: c**

**Note:** to stop codon

GGGAAATGTTGTCTCGATGGATACCACTGCTGTCCATTTGGATTGGACTGTGATCACACCTACACGCACT  
GTCTGAGGGAAAACTCACATATCCCTTCTCTATAAGCCAGCGCTGCCTTCAGCACCTGCTTCTCCCAT  
CCCAAAGGCAAAGGAAAGTAGGAGGTAG

**Genomic sequence note:** A genomic sequence is not presented (see note 2 in header).

---

00038 **P. lividus progranulin** Short name: **P\_liv** Date entered: 2014-03

**Species:** *Paracentrotus lividus* (common urchin)

**Taxonomy (via NCBI):** Eukaryota; Metazoa; Echinodermata; Eleutherozoa; Echinozoa; Echinoidea; Euechinoidea; Echinacea; Echinoida; Echinidae; Paracentrotus.

**General Comment:** With still only partial EST cDNA data and no genomic data, this species was included in the analysis to test how representative *S. purpuratus* was for sea urchin progranulin. The EST data provide the beginning of the coding sequence, then some middle repeat sequence, and a contig of 11 EST sequences corresponds with S\_pur\_22 to p, except that a full module is in place of the paraganulin.

**Protein Sequence**

Protein sequence not yet prepared. May be too incomplete to show.

**Transcript:**

**Note:** Incomplete. Three disconnected fragments. beginning of the coding sequence but no end at this time. The cDNA data define the transcript well (below), so no predicted sequence is required.

**cDNA data:**

**From:** NCBI est: AM512207.1 GI:139272915

**Note:** This cDNA fragment encodes a signal peptide, one full granulin module, and most of a second module.

GTCGTCTAAGATAATAGGATTTAGGCCATTTCAGGATTCGACTGTGAGCTGTGTGAACCATAACTACCGATT  
GATGTTGGTGGTTGATTGAAATTACAAAGCTAAGACAGGAGCAAAATTTGCGCTGAGATAGGGTTTTCTT  
TCTCACTCAGTCACTGTTATTCTGTGTGGCTTGCCCTGCAGACAGTAAAAAGGATGAAGCTGGTGGTTAT  
CATTGTGGCTTCTCTGGTGTGCTGGCACTTGGAGGACCCCTGAAAAATATCAGAGGAACCATCCTCATTG  
GTGGAGAAACTTACCAAAGCTACAGTTTGCAAAAGTGAAAGACATGTGGTGTACCTCGACTTGTGTG  
ATGGCTTGAACGATGAAACCGGATGCTGTGCTTACCCTAATGCAGTGTGCTGCTCTGATGGTCTGTCATTG  
TTGCTCTGCTGGATATGAATGTGATGTCATCAACAACATTTGCAAGAGCAGAGAAAGTGTTAAGTTTATG



GCCCATGTAACAAATGGTGAATCTAATGTGATTTGCCCTGGTGGACAGTCTGAATGTCCAGACGGGAATA  
CATGTTGCAGACTTCCTACTGGTCAGTACGGTTGTCTCCTTACCAAACGCAGTTTGTGTAGTGATGG  
CGAGCACTGCTGTCCATCCGGTTTAACTTGGTCGTCTAAGGTCGTCTAAGGTT

**From:** NCBI est: AM599110.1 GI:139242821

**Note:** This cDNA fragment encodes 2 full granulin modules between most of a C-half and about 70% of another module. It is part of the repeat.

TGTTGTAGTGATGGTGAGCACTGCTGTCCATCAGGCTATACTTGTGATCCATCAGCTGGAACTTGTTCAA  
GAGGGGAGGATGTTGTGCTGTGGTCTGAAAAGTCCCTGTCTACTCCTGTACATTTGGGAAAGTGAATCTG  
TCCCTGGTGGACAGGCTGAATGTCCAGATGGGAATACATGTTGCAGACTTCCCTCTGGTCAATATGGTTGT  
TGCTCTTACCAAATGCAGTGTGTTGTAGTGATGGCGAGCACTGCTGTCCATCAGGTTATACTTGGCATG  
TATCAGCTGGAACTTGTTTACAAAGGGGAGGATGTTGTGTTGTGGTCTGAAAAGTCCCTGTGCAACTCCTGC  
GCATTTGGAAAATGTAGTATGTCTGGAGGACAGGCTCAATGTCCAGATGGGAATACATGTTGTAGACTT  
CCTACTGGTTCAGTACGGTTGTTGTCTTACCAAATGCAGTGTGTTGTAGTGATGGCGAGCACTGCTGTG  
CATCAGGTTATACTTGGCATGTATCAGCTGGAACTTGTTCAAGAGGGGAGGATATTGTGTTGTGGTCTGA  
AAAGTCCCTGTCCACTCCTGTGCATTTGGAAAATGTAGTCTGTCTGGAGGACAGTCTCAATGTCCAGAT  
GGGAATACATGTTGCAGACTTCCCTACTGGTTCAGTATGGTTGTGCTCTCCCAAACGCAGTGTGTTGTA  
GTGATGGCGAGCACTGCTGTTGTGTTGTAGTGTGTTGTAGTGTGTTGTAGTGGG

**From:** NCBI est: Contig of GI:(139242821, 138486394, 139301968, 139229200, 139349007, 139362091, 139309851, 139303794, 138476016, 138480889, 139275101, 89472664)

**Note:** This cDNA fragment encodes most of a C-half and 5 full modules corresponding to the *S. purpuratus* sequence near the end of the large repeat (exon 2) through exons 3 and 4. The N-half of the last module encoded in this contig corresponds to the *S\_pur* paraganulin.

TGTTGTAGTGATGGTGAGCACTGCTGTCCATCAGGCTATACTTGTGATCCATCAGCTGGAACTTGTTCAA  
AAGGGGAGGATGTTGTGTTGTGGTCTGAAAAGTCCCTGTGCAACTCCTGTGCATTTGGAAAAGTGAATCTG  
TCCCTGGTGGACAGGCTGAATGTCCAGATGGGAATACATGTTGCAGACTTCCCTCGGGTCAATATGGTTGT  
TGCTCTTACCAAATGCAGTGTGTTGTAGTGATGGTGAGCACTGCTGTCCATCAGGTTATACTTGTGATG  
TATCAGCTGGAACTTGTTTACAGGGGAGGATGTTGTGTTGTGGTCTGAAAAGTCCCTGTGCAACTCCTGT  
GCATTTGGAAAAGTGAATCTGTCTGGTGGACAGGCTGAATGTCCAGATGGGAATACATGTTGCAGACTT  
CCTTCGGGTCAATATGGTTGTTGTCTTACCAAATGCAGTGTGTTGTAGTGATGGTGAGCACTGCTGTG  
CATCAGGTTATACTTGTGATGTATCAGCTGGAACTTGTTTACAAGGGGAGGATGTTGTGTTGTGGTCTGA  
AAAGTCCCTGTGCAACTCCTGTGCATTTGGAAAAGTGAATCTGTCTGGTGGACAGGCTGAATGTCCAGAT  
GGGAATACATGTTGCAGACTTCCCTTCTGGTCAATATGGTTGTTGTCTTACCAAATGCAGTGTGTTGTA  
GTGATGGTGAGCACTGCTGTCCATCAGGTTATACTTGGCAGTATCAGCTGGCACCTGCACACAGGGTTC  
CAGTATCTTGGAAATGGAGTTCTAAGTCTAATCCTCACAAAGAAAACCCAGAAATGTTCAAAAATCTTGCAACT  
GTTGGATCAGTTATAATGTGCCCAGATAAGAAGACCTCATGTCCACAAGCAAAACACCTGTTGCCCTCTAA  
TGACATCAGGGGAAATGGGGCTGTGCCCAGTACAAAACGCTATTTGCTGCGATGACCACAAGCACTGCTG  
TCCGTCAGGCTACACCTGTGGAAACCAACTCCTGCCAGAAAGGGCTCCAAGCACCTGCCTCTTCTACCAAAG  
GCTGCTGGCCTCCTCAAACTTACATAACCACAGCCAAGAAAAGCAAGAGGTCATAATTCACAACAAGAAAGC  
ACCTGTTATTCTCACCAGATGAACCAAAAGACAGGATCTGTAATCTGCCCTGGTGGTCAATCTGAAATGCC  
AGATGGAAACCATCTGTTGTCTATTATCCAGCGGCCAATATGGATGTTGCCCTCTCCCTCAGGCGGTGTGC  
TGTGCTGACAAAAGAGCATTGTGTCCAAATGACTATACCTGTGACCCACCTCATCCACCTGTATGCGGG  
GTATACACCATCTACCATGGTTGAGTAAAGTCCCATCAACTCCACT

#### Genomic data:

**Note:** There are no genomic data for progranulin in this species at this time.

No genomic sequence to show (or empty ID or entry).

No exon sequence to show (or no genomic sequence entry).

**Genomic sequence note:** A genomic sequence is not presented (see note 2 in header).

---

00031 **Paralabidochromis chilotes progranulin C** Short name: **P\_chiC (obsolete Pc1)** Date  
entered: 2014-03

**Species:** *Paralabidochromis chilotes* (*Victoria big-lipped Hap*). AKA *Haplochromis chilotes*.

**Taxonomy (via NCBI):** Eukaryota; Metazoa; Chordata; Craniata; Vertebrata; Euteleostomi; Actinopterygii; Neopterygii; Teleostei; Euteleostei; Neoteleostei; Acanthomorpha; Acanthopterygii; Percomorpha; Perciformes; Labroidae; Cichlidae; African cichlids; Pseudocrenilabrinae; Haplochromini; Paralabidochromis.

**General Comment:** Abundant EST data. No genomic data at this time.

## Protein Sequence

MLRISLCLSFVFLWGFASCSMCPDGGSTCSDTATCCKAYIGYGCCPYQNAMCCADRVHCCPSGYRCNLVT  
MKCEKLDQPWLTIIPMKVKEAAEKPAPELPGTLPQLKESHVPDQIKTSVVYCDSTYTYCPDRITCCRHPQ  
GGWTCPPYSPGKCLDGYHCCPIGFDCDRTYQHCVREKLTYPFLRKPALPSAPASFIPITSEDKEN\*

## Transcript:

**Note:** Transcript given as a contig of 99 est sequences from both 5' and 3' reads, so that this small transcript is very well defined.

The cDNA data define the transcript well (below), so no predicted sequence is required.

## cDNA data:

**From:** NCBI est: Contig of 99 sequences. Representative est sequences are from the 5' end by BJ674509.1 GI:46515273, and from the 3' end by BJ681837.1 GI46524958.

**Note:** cDNA sequence data:

```
CTTTTTTTTTTCGGGAAAGTGTGAAAGGCATCACAGGAAGCTGCTGAATTTCTTCACTGCCTAAAGAT  
GTTGAGGATCAGTCTGTGTTTGTCAATTCGGTGTGTTTCTGTGGGGATTTGCTTCATGCTCTATGTGTCT  
GATGGGAGTACTTGTTCAGACACCGCCACCTGTGCAAGGCTTATATCGGATATGGCTGCTGCCATATC  
AAAATGCCATGTGCTGTGCCGACCGGGTCCACTGTGCCCCCTCAGGATATCGCTGTAACCTGGTTACCAT  
GAAATGTGAGAAATTAGACCAGCCGTGGCTGACCATACCCATGGTGAAGAAGGAAGCTGCAGAGAAACCA  
GCCCCCCTGAACTGCCTGGAATCCACTCCAGGAGCTTAAAGAGAGCCACGTCCCAGATCAAATAAAGA  
CTTCAGTGGTCTACTGTGACAGTTACACCTACTGTCTGATCGCACTACTTGTGCAGACACCCACAAGG  
AGGCTGGACCTGTTGTCCCTACTCTCCTGGCAAATGTTGTCTGGATGGCTACCACTGCTGTCCAATTGGA  
TTTACTGTGACCGCACCTACCAGCACTGTGTGAGGGAAAACTCACATATCCTTTTCTCCGCAAGCCAG  
CACTACCTTCAGCACCTGCGTCTTCATCCCAACTTCAGAGGACAAAGAAAACTAGAAGAAGGGACACAG  
GAAGCAGATTTTCAGCTGTGTGACTATAGATGTACCTACAACCCCTCTTGCGGTATGGTAACACATGCT  
GAGATGGCTTTAAAGTCCACTGTGATAGATTTTTTTTTGGTTATTTTTGTTAAAAATTGTCTAAAAATTAT  
TTTTGCCATGTGAAAGTACACAGGTGTAATAAATTTGTAATAAATCTTAAGCTAATGTTACT  
GCATATTTATAATGGAGAGTACCAATTATTGCTTTAGTAATGGAAATGTGGTTTTTATCTATTCCATT  
GTCTTATATTGCCCTGTGACTGAGTGTGAGTATAGACCAGCATGTTGAATTTAAGGTAGTAAGGT  
GAAAGGCTTCTGATTTGTTTTATGGTTTTCTTCTTCTTTGTGTACTTTTCACTTGCACCAATAAAAAAT  
AACATCTTCTTCAAAAAAACAACAAAAAAGGATCCATAATC
```

## Genomic data:

**Note:** No genomic data. Expect exon structure as in other closely related cichlids like *Rhamphochromis esox*.

No genomic sequence to show (or empty ID or entry).

No exon sequence to show (or no genomic sequence entry).

**Genomic sequence note:** A genomic sequence is not presented (see note 2 in header).

---

00044 **Petromyzon marinus Grn-related S1** Short name: **P\_marS1** Date entered: 2014-11

**Species:** *Petromyzon marinus* (sea lamprey)

**Taxonomy (via NCBI):** Eukaryota; Metazoa; Chordata; Craniata; Vertebrata; Cyclostomata; Hyperoartia;

*Petromyzontiformes; Petromyzontidae; Petromyzon.*

**General Comment:** An interesting Grn variety: Contains a half-module (paragranulin) at the beginning, which is most similar (by protein BLAST) to mammalian paragranulins. Then a reduced motif module with only 3-double-Cys. It is most like (via protein Blast) a module with similar motif in a platyhelminth (*Echinococcus granulosus*). Finally, there is a module with typical Cys motif, which has a best Blastn hit with rabbit module 4 and the second of 2 modules in a puffer fish small form (different from the ggg small form). Furthermore, in comparison with the Coelacanth A and C progranulins, the module is most similar to the repeated modules in L\_chaC, again suggesting a closer relationship with many fish small-form genes.

## Protein Sequence

MALPRPLMFVLVASGLCALVSADRCPDGRFCVSRCCWNLRSRYTCCWVGEQGETQGALATVPAQAIISA  
TVSQVTSCAGSVCSANGESRCCPLSEGSCCGDGLSCCGKSTCTTFRGLNLCLPDAEFQDPVATFLSREQ  
QQQQDGCVDSSGCPAGSDCHGASGDHRGQCVSSAALTPWVEKEAALS GPVGAHVVYCGSGQYCRDGQTC  
RLATGSWGCCNIPHAICSDGIHCCPAGHFCLTASGLCARSTLALPAVEGV\*

## Transcript:

**Note:** Very well defined by EST data. No prediction necessary.

The cDNA data define the transcript well (below), so no predicted sequence is required.

#### **cDNA data:**

**From:** NCBI est: Contig of GI:(51801419, 51801297, 51801208, 51801306, 51801280, 51801428, 51801407, 51801143, 51801359, 51801331, 51801443, 51801227, 51801256, 109187956, 51798656, 166894134, 109188626, 109183559, 51797424, 166886616, 166872921, 90815534, 51799995, 51800505, 51801161, 51800021, 51800020, 51801167, 51800902, 166886602, 51801347, 51801307, 116021539, 166894944, 166892750, 51801316, 51801324)

#### **Note:**

```
TTAGTGATTAGCGTGGTCGCGGGCCGAGGTACGCGGGGACATGACCTGGTGAAGGTCGCCGATAAGCTGGT
GGGCTCATGCCAGCGTGACGCTTTATAAGGGACAGCAGCAGCAACGCGGGGGTTCGATCAGCGCTGTG
TTCTCACTTGGGCTCAGCGAGGAGGCGATCGCGATGGCTCTTCCACGTCCGCTGATGTTCTGTGCTGGTGG
CGTCCGGGCTATGTGCCCTCGTGTCTGCCGACCGTTGCCCTGATGGTTCGATTCTGCGTATCGCGTTGTTG
CTGGAACCTTATCCCGATACACTTGTGCTGGGTAGGAGAAGGTGAAGGCCAGGGCGAGACACAGGGGGCA
TTGGCCACAGTTCAGCTCAGGCCATCTCTGCCACAGTCTCACAGGTCACCTCCTGCGCAGGCTCCGCTCT
GCTCGGGCAATGGAGAATCTCGCTGCTGCCCTTGTCTGAGGGCTCGTGTGTTGGTGGACGGCCGTGCTGTG
CTGTGGAAAAGGATCCACCTGCAACCCTTCCGAGGGCTCAACCTTTGCCCTCCCCGATGCGGAATTTTCAG
GACCTGTGGCCACCTTCTGAGCCGTGAGCAGCAGCAGCAGCAGGACGGCTGCGTGGACAGCAGCGGGCT
GCCCCGCGGGGAGCGACTGCCACGGGGCGAGTGGCGACCACAGGGGGCAGTGCCTGAGCTCGGGCCGCGCT
CACCCCTGGGTGGAGAAGGAGGGCGGCTCTCAGGCCCTGTGGGAGCTCACGTTGTGTACTGCGGGGAGC
GGGACGTACTGCCGGGACGGCCAGACCTGCTGTCTGCCCTGCCACCGGCAGCTGGGGCTGCTGCAACATCC
CGCACGGGATTGCTGCTCTGACGGGATTACTGCTGTCCGGCTGGGCACTTCTGTCTCACGGGCTCGGG
TCTCTGCGCTCGGTCCACACTGGCACTGCCCGCTGTGGAGGGTGTCTGAGATGCGTGTGCCCCCCCCCCCC
CAGTGAGCCTTAGAGTGTCTCGGTGCACGAAGCAAAAAAACCACGCCGTGCGTTGCACCACCCCATCGA
TGTGCTTAACTTAGATGTTATGCATTCGGTATGCTTTTTACTAGCTTCTTTTTATTGCAGCCATTTCGTAT
TTAAACACCTTAAAAATATAATTTTTTCGTATCAGCAATGGAATGAGACAGATAAACCAATTCGGATAT
TTCCAGAGCAGTAACAACAGTAGCAACCTTAGGTGTTTTGAGAAGAGCTCACGGAAGCAGATGTCGCAA
CACTACCTCTGAAATCTCCTAATGTGACATCTGGTCCACACATCACAGGGCAGCACAAATTTCTCACATA
TTAACGGCACATTATTCAAATTAGGGGTATTGTATTAGCGTTTTGTATTATTTAATCTTCATTAAATTAT
AACCCCTGAAAAGTTTAAATAAGAGCAGGTGTCGCTACAATTTACCCACGAAGTATAATCATGATACACT
GACCAGCGTAATAATTCAAACAGCTGAAGCTCGCACGGTGTTTTTAAATAATCGGGATGTGTAATGCACCT
CGTAATACGCTTAAAAATAACAGGCTGATGCCAACATCCACTGATTTAATACTGTTCTTCAAAGGGACAG
TGTTGTAATCGATGCCATTCTCTACACTGACTGTACACCTGTACTTTAATGGACGTTGTCAATTTCTTTCT
GCTATTGTAACAAAATGGCTGCAATAAACCTGTCCCCCTTTCGAAAAAAAAAAAAAAAAAAAAAAAAAAAA
```

#### **Genomic data:**

**Note:** The reverse complement of gi:308016283, gb:AEFG01008630.1, has the first 3 exons near its end. Exon 4 was found in a contig of 3 wgs sequences from the NCBI trace archive. The last exon is in gi:308016284, gb:AEFG01008629.1.

From NCBI wgs: gi:308016283, gb:AEFG01008630.1

**Note:** First 3 coding exons are near the end of the reverse complement. There are some minor differences from the more reliable EST contig sequence.

#### **Coding exon 1 Exon type: sn**

**Note:** Also has 5'ut sequence.

```
CACATGACCTGGTGAAGGTCGCCGATAAGCTGGTGGGCTCATGCCAGCGTGACGCTTTATAAGGGACAGC
AGCAGCAGCCTGTCTGTCTGATCAGCGCTGTGTTCTCACTTGGGCTCAGCGAGGAGGCGATCGCGATGGCT
CTTCCACGTCCGCTGATGTTTCGTGCTGGTGGCGTCCGGGCTATGTGCCCTCGTGTCTGCCGACCGTTGCC
CTGATGGTTCGATTCTGCGTATCGCGTTGTTGCTGGAACCTTATCCCAGTACACTTGCTGTGGGTAGGAGA
A
```

#### **Coding exon 2 Exon type: n"**

**Note:** Encodes an incomplete N-half module which lacks the first double Cys, and the spacing of the 2 single Cys is aberrant. Some EST data show a splice 3 bases upstream adding an AAG (Lysine codon) at the beginning of this sequence.

```
GGTGAAGGCCAGGGCGAGACACAGGGGGCATTGGCCACAGTTCAGCTCAGGCCATCTCTGCCACAGTCT
CACAGGTCACCTCCTGCGCAGGCTCCGTCTGCTCGCCAATGGAGAATCTCGCTGCTGCCCTTGTCTGA
G
```

#### **Coding exon 3 Exon type: c**

GGCTCGTGTGTTGGTGACGGCCTGTCGTGCTGTGGAAAAGGATCCACCTGCACCACCTTCCGAGGGCTCA  
ACCTTTGCCCTCCCGATGCGGAATTTTCAGGACCCTG

From NCBI Trace: Contig of gnlltil1483540875, gnlltil1193824538 and gnlltil1180101663.

**Note:** Note to NCBI: the trace archive is very useful at times.

**Coding exon 3 Exon type: xn**

**Note:** The x denotes a sequence unlike a Grn half module, but having 4 Cys in it.

TGGCCACCTTCTGAGCCGTGAGCAGCAGCAGCAGCAGGACGGCTGCGTGGACAGCAGCGGCTGCCCCGC  
GGGAGCGACTGCCACGGGGCGAGTGGCGACCACAGGGGGCAGTGCCTGAGCTCGGCCGCGCTACCCCC  
TGGGTGGAGAAGGAGGGCGGCGCTCTCAGGCCCTGTGGGAGCTCACGTTGTGTACTGCGGGAGCGGGCAGT  
ACTGCCGGGACGGCCAGACCTGCTGTCGCCCTCGCCACCGGCAGCTGGGGCTGCTGCAACATCCCGCAC

From NCBI wgs: gil308016284|gblAEFG01008629.11

**Note:** Last exon starts about 330 bases into the reverse complement.

**Coding exon 4 Exon type: c**

**Note:** Includes also all 3'ut.

gcgatttgcctgctctgacgggattcactgctgtccggctgggcaacttctgtctcacggcgtcggttctct  
gcgctcggtccacactggcaactgcccgtgtggaggggtgtctgagatgcgtgccccccccccccccagtg  
agccttagagtgtcggtagcaagcaaaaaaaaaaacacgcctgcgttgcgtcacccttcgatgtgct  
taacttagatgttatgcattcggtagctttttactagcttctttattgcagccattcgctatttaaaca  
ccttaaatatataatTTTTcgctatcagcatgatggaatgagacagataaaccattcgatatttcccaga  
gcagtaacaacagtagcaacccttaggtgtttgagaagagctcacggaagcagatgtcgcaacactacct  
ctgaaatctcctaattgtgacatctggtccacacatcacagggcagcacaatattctcacatattaacggc  
acattattcaaattaggggtattgtattagcgtttttgtattatttaattcattaaattataaccctg  
aaagtttaataagaagcaggtgtcgctacaatttcacccacgaagtataatcatgatacactgaccagcg  
ctaataattcaaacagctgaagctcgacaggtgttttaaatatcgggatgtgtaaatgcaactcgtaatac  
gcttaaaaataacaggtgatgccaacatccactgatttaataactgttcttcaaaagggacagtggtgtaa  
tcgatgccattctctacactgactgtacacctgactttaatggacgttgtcatttctttctgctattgt  
aaacaaaatggctgcaataaacctgt

**Genomic sequence note:** A genomic sequence is not presented (see note 2 in header).

---

00045 **Petromyzon marinus Grn-related S2** Short name: **P\_marS2** Date entered: 2014-11

**Species:** *Petromyzon marinus* (sea lamprey)

**Taxonomy (via NCBI):** Eukaryota; Metazoa; Chordata; Craniata; Vertebrata; Cyclostomata; Hyperoartia;

*Petromyzontiformes; Petromyzontidae; Petromyzon.*

**General Comment:** This is closely related to Pmar\_S1. It encodes a paraganulin and a module lacking the first double Cys. It does not include a full Grn module.

### Protein Sequence

MALPRPLMFVLVAVSGLCALVSDRCPDGRYCASRCCWKFSRYTCCWAGEGKQGQGETQRALATVPAAEAI SV  
KVTSCAGSVCSANGESRCCPLSEGSCGDGLSCCGKGSTCTTFQGLNVCLPNAKFQDRGNMLL\*

### Transcript:

**Note:** Quite well defined by and EST contig.

The cDNA data define the transcript well (below), so no predicted sequence is required.

### cDNA data:

**From:** NCBI est: Contig of GI:(51801150, 51801371, 51801396, 51801203, 51801444, 166891179)

**Note:**

ACGCGGGGATCAGCGCTGTGTTCTCACTTGGGCTCGGCGAGGAGGCGATCGCGATGGCTCTTCCACGTCC  
GCTGATGTTCTGTGCTGGTGGCGTCCGGGCTATGTGCCCTCGTGTCTGCCGACCGTTGCCCGATGGTCAA  
TACTGCGCATCGCACTGCTGCTGGAAAATTTCCCGATACTTGTGCTGCTGGCAGGAGAGGGTAAAGGCC  
AGGGCGAGACACAGAGGGCATTGGCCACAGTTCAGCTGAGGCCATCTCTGTCAAGGTCACCTCCTGCGC  
AGGCTCCGTCTGCTCGGCCAACGGCGAATCTCGCTGCTGCCCTTGTCTGAGGGCTCGTGTGCGGTGAC  
GGCCTGTCTGTGCTGTGGAAAAGGATCCACCTGCACCACCTTCCAGGGGCTCAACGTTTGCTGCCCAATG  
CAAAATTCAGGACCGTGGCAATATGTGCTCTGACGGGATCCTCTGCTGTCCGGCTGGGCACTTCTGCA  
TTGGATCTGTGCGCTCGGTCCACGCTGTGGAGGGTGTCTGAGATGTGTGCCAGTGGGCATCACAGTGTCT

GCGTGCACGAAGCACTGTGCATTGCACCCTTCGACTGCTCTTTGTGTGATTTTTTTTATTTGCAGCAATTC  
ACATAAAAAAACACGAATAGCACCTTGCTCTTTATAGTCTTGGTTCTTTTCGGTAAAGTCAAGTAGAGGGG  
AAACAATCAAGTAATAAAAAATGTTGAACGATAAAAATTCTCGCGACGTTTCGACTGCGGCGCGGGGCGGTC  
ATCATCAGGTGTGAAGGCCACAACAAGGAAAATGTGGGAAGAAGTGGCGGTTTTTTTTTGCCCTCAA

### Genomic data:

**Note:** The coding exons, the last including much 3'ut sequence, are in the reverse complement of gi:308016282, gb:AEFG01008631.1.

From NCBI wgs: gi:308016282, gb:AEFG01008631.1

**Note:** In the reverse complement.

#### Coding exon 1 Exon type: sn

**Note:** From the start codon.

ATGGCTCTTCCACGTCCGCTGATGTTTCGTGCTGGTGGCGTCCGGGCTATGTGCCCTCGTGTCTGCCGACC  
GTTGCCCCGATGGTTCGATACTGCGCATCGCGCTGCTGCTGGAAATTTTCCCGATACACTTGCTGCTGGGC  
AGGAGAG

#### Coding exon 2 Exon type: n"

**Note:** Here n" denotes encoding of a 4 Cys variant of an N-half, which lacks the first double Cys.

GGTAAAGGCCAGGGCGAGACACAGAGGGCATTGGCCACAGTTCCAGCTGAGGCCATCTCTGTCAAGGTCA  
CCTCTGCGCAGGCTCCGTCTGCTCGGCCAACGGCGAATCTCGCTGCTGCCCTTGTCTGAG

#### Coding exon 3 Exon type: c

GGCTCGTGTGCGGTGACGGCCTGTGCTGTGTTGAAAAGGATCCACCTGCACCACCTTCCAGGGGCTCA  
ACGTTTGCTGCCAATGCAAAATTCAGGACCGTG

#### Coding exon 4 Exon type: termination and 3'ut

**Note:** Has the last 5 codons then 3'ut. But it seems that frame-shifts disrupted a Grn C-half sequence. It is seen in another reading frame AICCSGDILCCPAGHFCIGS... but is lost again by mutation.

GCAATATGCTGCTCTGACGGGATCCTCTGCTGTCCGGCTGGGCACTTCTGCATTGGATCTGTGCGCTCGG  
TCCACGCTGTGGAGGGTGTCTGAGATGTGTGCCAGTGGGCATCACAGTGTGCGTGACGAAGCACTGT  
GCATTGCACCTTCGACTGCTCTTTGTGTGATTTTTTTTATTTGCAGCAATTCACATAAAAAAACACGAAT  
AGCACCTTGTCTTTATAGTCTTGGTTCTTTTCGGTAAAGTCAAGTAGAGGGGAAACAATCAAGTAATAAA  
AATGTTGAACGATAAAAATTCTCGCGACGTTTCGACTGC

**Genomic sequence note:** A genomic sequence is not presented (see note 2 in header).

---

00046 **Petromyzon marinus Grn-related S3** Short name: **P\_marS3** Date entered: 2014-11

**Species:** *Petromyzon marinus* (sea lamprey)

**Taxonomy (via NCBI):** Eukaryota; Metazoa; Chordata; Craniata; Vertebrata; Cyclostomata; Hyperoartia; Petromyzontiformes; Petromyzontidae; Petromyzon.

**General Comment:** Has no full module sequence. Has the same 10 Cys form (with just 3 double Cys) as found in Pmar\_S1 and Pmar\_S2, which shows the close relationship between these genes. The paragranelin-like beginning is less like a typical N-half module.

### Protein Sequence

MAFPRALLLLLLVAGLASACPCGRRRCCVRGLNVYCCFADKGENGVMLSMVPAQAVSPYNAHARSCTGS  
VCSANGESRCCPLSEGSCGDGKSCCGKTTCTMYGGVNLCLPHAELSFPVATMLNREQQGGCVEDSGCP  
AGSKCHGVTDDTEGQCVSSAVPIPEEVL\*

### Transcript:

**Note:** Very well defined by EST data.

The cDNA data define the transcript well (below), so no predicted sequence is required.

### cDNA data:

**From:** NCBI est: Contig from GI:(51801314, 51801340, 51801339, 51801387, 51801216, 51801166, 51801388, 51801281, 51801330, 51801361, 51801493, 51801305, 51801409, 51801399, 51801315, 51801159, 51801169, 51801335, 51801185, 51801196, 51801323, 51801350, 51795109, 114312690, 51801234, 90816872, 90816337)

**Note:**

ACGCGGGGGCACACAACACGTTTCGCAACCAAGCTTTAACATCCTTTGTGAAACATTTCTTGTCTAACCG  
TCCAACAAAAATTTTCATCTCAGGATGCCTGCATGACTTGATTAGAGGTGCGGATTAGTTGGCTCATGTCCG  
CGTGGGGGGCTTTATAAGGAGGGGACCCTGCATACCCAGGGGAGCTCGCATCCTCACCTGGACTCAACGA  
AGACGCAACCGTCATGGCTTTTCTCGTGCCTCTTGTGCTGTTGGTGGTGGCCGGGCTCGCGTCCGCT  
TGCCCTGTGGCAGAAGGAGGTGTTGCGTTCGAGGCTTGAACGTTTACTGCTGTTTTGCAGACAAGGGTG  
AAAACGGAGTCATGCAGTTGAGCATGGTGCCGGCGCAAGCCGTGTCTCCCTACAACGCACACGCTCGCTC  
CTGCACGGGCTCCGTGTGCTCGGCCAATGGAGAATCTCGCTGCTGCCCTTGTCTGAGGGTTCATGCTGT  
GGAGATGGGAAGTCATGCTGTGGCAAAGGGACAACCTGCACTATGTATGGAGGGGTCAACCTTTGCCTTC  
CCCATGCTGAATTAAGCTTCCAGTGGCCACGATGTTGAACCGTGAGCAACAGGGAGGCTGCGTGGAGGA  
CAGCGGTGCCCGCGGGCAGCAAGTGCACGGGGTACTGACGACACCGAGGGGCAGTGCCTGAGCTCG  
GCCGTGCCATCCCTGAGGAGGTGCTGTAGTGCCATTTCTAGGTGATGGGCACTGCTGTCAGTGATGCC  
TGCTGCTCTCTGATCGATAGCAGCTGCTTACATCGCCAGGTCTCTGTGCTTGCAACAGCAAGGCATTGC  
ATGCGTACTTTCTTATTACATGATGCAACAGATTACACGTTACATTGGGTACTGCTGATCAGGT  
TAACTGCAATGTGTACGTTCTTACATTGTACACGGTACTGCACACCATGCCTTGCAAGCTGGGACAC  
TGCATTTGGCAAAGTTCTTTGATCCACATTCTGCCGAAATCTATAAATATCCAGTTAAATAGTGGTCTGA  
GTAGTCATATTTACCATTATACAAAACAGATAGAGTTCCCATCTCTTGAAGGTGATGTGCTTTGAAGC  
CTTACTGCTGAACAAATTTTTTTTTTAAATGATTTTCATGCCCTCA

### Genomic data:

**Note:** First 2 coding exons are in gi:308016281, gb:AEFG01008632.1 (from about 5670). The rest of the gene is in gi:308016280, gb:AEFG01008633.1, which also has the beginning of Pmar\_S4.

From NCBI wgs: gi:308016281, gb:AEFG01008632.1

#### Coding exon 1 Exon type: sn'

**Note:** Here the difference indicated by n' is an unusual spacing of the 2 single Cys, which are separated by a single Pro. Note also that the splice donor is AAGcaag. Sequence starts at earliest correspondence with the cDNA sequence.

cacacaacacggttctcgcaaccaagctttaacatcctttgtgaaacatttcttgtctaaccgtccaacaaa  
aatttcatctcaggatgctgcatgacttgattagaggtgctgattagttggctcatgtcgcgtggggg  
ctttataaggaggggacctgcatgccgaggtgagctcgcacctcacctggactcaacgaagacgcaac  
cgtcatggcttttctcgtgcactcttgcctgctgctggtggtggcgggctcgcgtccgcttgcctgt  
ggcagaaggaggtgctgcgttcgaggcttgaacgcttactgctgcttttgcagacaag

#### Coding exon 2 Exon type: n''

**Note:** Here n'' denotes encoding of a 4 Cys variant of an N-half, which lacks the first double Cys.

ggtgaaaacggagtcagcagttgagcatggtgccggcgcaagccgtgtctccctacaacgcacacgctc  
gctcctgcacgggctccgtgtgctcggccaatggagaatctcgcctgctgcccttgtctgag

From NCBI wgs: gi:308016280, gb:AEFG01008633.1

#### Coding exon 3 Exon type: c

ggttcatgctgtggagatgggaagtcatgctgtggcaaagggacaacctgcactatgtatggaggggtca  
acctttgccttccccatgctgaattaagcttccag

#### Coding exon 4 Exon type: x and termination.

**Note:** Last coding exon encodes a polypeptide with 4 single Cys (x). The next exon containing 3'ut sequence is 1694 downstream in this contig.

tggccacgatgttgaaccgtgagcaacagggaggtgctggtggaggacagcggctgccccgcgggagca  
gtgtcacggggtgactgacgacaccgaggggagctgctgagctcggccgtgccatccctgaggaggtg  
ctgtagtgccatttcc

**Genomic sequence note:** A genomic sequence is not presented (see note 2 in header).

---

00047 **Petromyzon marinus Grn-related S4** Short name: **P\_marS4** Date entered: 2014-11

**Species:** *Petromyzon marinus* (sea lamprey)

**Taxonomy (via NCBI):** Eukaryota; Metazoa; Chordata; Craniata; Vertebrata; Cyclostomata; Hyperoartia; Petromyzontiformes; Petromyzontidae; Petromyzon.

**General Comment:** Distinct from Pmar\_S1, but with similarities. It begins with a paragrulin, has the granulin-related module with only 3 double Cys, and ends with a module having an almost normal granulin motif. In this case, there is a triple Cys in place of the normal first double Cys, which aligns with the CCC in the plant granulin-related module, although the motif is otherwise more typical of animal granulin.

## Protein Sequence

MPAWQQRLLLLLVPCVVLVVDADVCLDGKHCGAAQCCLYSSGWDCRWEKIAEQSDVIPAVALLPAES  
EDSIDCSGPICLHSGEPLCCPAPAGVCCTDGRACCAANNTCITVEDMHVCYPEGGWKRTGQPTSASPKQH  
QEGCMDDRGCPKDKRCRGSVSHLGGCQLSAEVNPWAKMEVALPTLMTTAAAVVTKAASLPWEKQVNSVS  
CANRRYCPGDSTCCCLPAGSWGCCGVPNAVCCADGVHCCPAGHVCMKEYCMKSSEENSVLVKP\*

## Transcript:

**Note:** Only one EST found for this gene. A longer read (into poor quality data) was present in the NCBI trace archive. It was useful for discovering the genomic sequence. A predicted sequence is given based upon the genomic data in order to complete the sequence for the beginning of the first coding exon and all of the last coding exon.

## Predicted sequence:

**Note:** Confirmed from 42 to 711 by the cDNA data.

**Derivation:** EST gi:109185376 and genomic sequence as given below.

```
atgcctgcgtggcagcagcggttgctgctgctgctgctgccttggttattagtgccgggtggatg
ccgatgtttgtctcgatggaaagcactgcgcgctgcccaatgctgcctctattcgtccgggtgggattg
ctgccgctgggagaagattgctgaacaaagtacgtcattccagcagtcgctctcctcctgcggaatct
gaagactccatcgactgctccggccccatctgcttgacagtgagaaaccgctctgctgctcctgccccag
caggtgtttgctgacccgatggaagagcatgctgctgcaaacacacatgcatcactgttgaggacat
gcacgtgtgttacctgaaggtggctggaaacgcacaggtcagccgacaagtgcaagcccaaacagcat
caggaaggtgcatggatgacagaggtgctccgaaggacaaacgttgccggggagtgagtggcagtcac
tgggccaagtccaactctcagccgaggtcaaccctgggcaaatggaggtggcactgcccacccttat
gacaactgctgcagctgttgctcaccaaggctgcttcctgcccctgggagaagcaagtgaacagtgctca
tgtgcaaatcgccgtaactgccccggcgacagcacatgctgctgcctcctgctggatcgtgggatgct
gcggtgtgcaaacgcggtgtgctgtgccgacggagtgcactgctgtccagctgggcacgtgtgcatgga
aaaatactgtatgaagtccagcgaggaaaattctgttttggtgaaaccataaagatttcatactg
```

## cDNA data:

**From:** NCBI est and trace archive: gil109185376|gb|EC383207.1|EC383207, and gnltil1309476743, PMAH-aab17h09.g1

**Note:** First 39 bases may be from vector. The additional sequence provided by the longer read in the trace archive is in lower-case.

```
CGACCCACGCGTCCGCGGACGCGTGGGTGGACGCGTGGGGCCTTGTGTTGTATTAGTGCCGGTGGATGCC
GATGTTTGTCTCGATGGAAAGCACTGCGGCGCTGCCCAATGCTGCCTCTATTTCGTCCGGGTGGGATTGCT
GCCGCTGGGAGAAGATTGCTGAACAAAAGTGACGTCAATCCAGCAGTCGCTCTCCTTCCTGCGGAATCTGA
AGACTCCATCGACTGCTCCGGCCCCATCTGCTTGCACAGTGGAGAACCCTGCTGCTGCTGCCCCAGCA
GGTGTGTTGCTGCACCCGATGGAAGAGCATGCTGCGCTGCAAAACAACACATGCATCACTGTTGAGGACATGC
ACGTGTGTTACCCTGAAGGTGGCTGGAAACGCACAGGTCAGCCGACAAGTGCAAGCCCCAAAACAGCATCA
GGAAGGTGCATGGATGACAGAGGCTGTCCGAAGGACAAAACGTTGCCGGGGAGTGAGTGGCAGTCATCTG
GGCCAGTGCCAACTCTCAGCCGAGGTCAACCCCTGGGGCAAAAGATGGAGGTGGCACTGCCCCACCCTTATGA
CAACTGCTGCAGCTGTTGTACCAAGGCTGCTTCCCTGCCCTGGGAGAAGCAAGTGAACAGTGTCTCATG
TGCAAAATCGCCGTAAGTGCACCCGCGACAGCACATGCTGCTGCCTCCCTGCTGGATCGTGGGGATGCTGC
GGTGTGCCAAaaccgcggtgtgctgtgccgacggagtgcactgctgtccagctgggcacgtgtgcatggaaa
atactgtatgaagtccagcgaggaaaattctgttttggtgaaaccataaagatttcatactggcagcctaac
ttctccaacagctacatccctatg
```

## Genomic data:

**Note:** This gene starts downstream of Pmar\_S3 in gi:308016280, gb:AEFG01008633.1. It continues in the reverse complement of gi:307990109, gb:AEFG01034804.1. The last coding exon was located in wgs sequences from the NCBI trace archive.

From NCBI wgs: gi:308016280, gb:AEFG01008633.1

**Note:** Near the end of the contig which has 2 coding exons and the last 3'ut exon for Pmar\_S3 upstream.

**Coding exon 1 Exon type: sn**

**Note:** Beginning at the start codon.

```
atgcctgcgtggcagcagcggttgctgctgctgctgctgccttggttattagtgccgggtggatg
ccgatgtttgtctcgatggaaagcactgcgcgctgcccaatgctgcctctattcgtccgggtgggattg
ctgccgctgggagaag
```

From NCBI wgs: gi:307990109, gb:AEFG01034804.1

**Note:** In the reverse complement of this contig.

**Coding exon 2 Exon type: n''**

**Note:** Encodes a polypeptide with 2 single Cys and one double Cys, distinct from, but similar to the 4 Cys forms in S1, 2 and 3. They all have ..CCXXX at the end to splice normally into a C-half, so it appears that the sequence including the first double Cys has been deleted. If the genomic contig is good, this exon is over 14400 downstream of exon 1.

```
attgctgaacaaagtgacgtcattccagcagtcgctctccttctcctgcggaatctgaagactccatcgact
gctccggccccatctgcttgacagtgagagaaccgctctgctgtcctgccccagca
```

**Coding exon 3 Exon type: c**

```
ggtgtttgctgcaccgatggaagagcatgctgctgcaaacacacatgcatcactgttgaggacatgc
acgtgtgttaccctgaagtggtggaacgcacag
```

**Coding exon 4 Exon type: xn'**

**Note:** Encodes another polypeptide with 4 single Cys (x), and then an N-half variant with a tripple Cys in place of the usual first double Cys (n').

```
gtcagccgacaagtgcaagcccaaacagcatcaggaaggctgcatggatgacagaggctgtccgaagga
caaacgttgccggggagtgagtgccagtcacatctggccagtgccaactctcagccgagggtcaaccctgg
gcaaaagatggagggtggcactgcccacccttatgacaactgctgcagctgttgtcacciaaggctgcttccc
tgccctgggagaagcaagtgaacagtgctcatgtgcaaatcgccggtactgccccggcgacagcacatg
ctgctgcctccctgctggatcgtggggatgctgcggtgtgcaaac
```

From NCBI Trace archive: Contig of gnllti:(1163855881, 1289728257, 1437921831, 1483859236, 1378711347, 1209757388)

**Coding exon 5 Exon type: c**

**Note:** Last coding exon continuing into 3'ut as far as confirmed by cDNA data.

```
gcggtgtgctgtgccgacggagtgcaactgctgtccagctgggcacgtgtgcatggaaaaatactgtatga
agtccagcgaggaaaattctgttttggtagaacataaagatttcatactggcagcctaacttctcaaca
gctacatccctatg
```

**Genomic sequence note:** A genomic sequence is not presented (see note 2 in header).

---

00034 **Petromyzon marinus progranulin L (Large or Long form)** Short name: **P\_marL**

Date entered: 2014-03

**Species:** *Petromyzon marinus* (sea lamprey)

**Taxonomy (via NCBI):** Eukaryota; Metazoa; Chordata; Craniata; Vertebrata; Cyclostomata; Hyperoartia; Petromyzontiformes; Petromyzontidae; Petromyzon.

**General Comment:** This large form progranulin sequence as predicted encodes 10 granulin modules. The N-terminal and 6 modules are supported by cDNA data. There are smaller granulin-related genes in this species. Preliminary analysis showed the 4 such genes we found are not typical of any fish small form, and have diverged too much to be usefully included in our current analysis.

**Protein Sequence**

```
MMRPAVVAALLTAVAGS IMCPDGHHCPCDADTCCLSAEQGYGCCPLPAAVCCSDGLHCCPSGTVCDLAHGM
CQKGIKISVPWLEKTPFTFPRNKQCPDGTSCGDDATCCPLASGQYGCCSLEDVCCSDYLHCCPKNTMCDL
KLGKCVHGLKLSIPWVSKYPSKQAASDVQCDAFTSCSDQNTCCILPSGQWGCCPLPKAVCCDDKEHCCPEG
TICNVTSQTCNHAALSLEPWSTKTPALRMTGEPNDVQCDDLVGCPDGNTCCKTPGGDWACCPLVKAVCCDD
HEHCCPQGTTCNLPAQTCDQGTLSLEPWSTKTPALRVAGEPNVVICDDQSSCPDGNTCCKTPGGDWACCPL
VKAVCCDDHEHCCPQGTTCNLPAQTCDQGTLSLEPWSTKTPALRVAGEPNVVICDDQSSCPDGNTCCKMPS
GDWCCPLPKAVCCDDHQHCCPEGTTCNLPEVERCDKGTLSLEPWSTKTPALRVAGEPNVVICDDQFSCPDG
NTCCCKLPSGDWCCPLVKAVCCDDHEHCCPQGTTCNLPAQTCDQGTLSLEPWSTKTPALRVAGEPNVVICD
DQFSCPDGDTCCCKMPSGDWCCPLVKAVCCDDHEHCCPQGTTCNLPAQTCDKGALSLEPWSTKTPALRVAG
EPNDVKCDDQVSCPDQTTCCCKTGTGDWCCPLVKAVCCDDHEHCCPEGTTCNVPAGSCDQGLSLEPWSSK
TPARTRLTALLPASAAAARGGSVRCD SAYACPDGTTCCQLPQGQWGCCPLPLATCCSDFVHCCPSGYTCDL
AQASC IKKPHFLTWAPKAPAKARPAQVFDLL*
```

**Transcript:**

**Note:** EST data confirm the beginning and sequence for the first six of the 10 modules.



**Predicted sequence:**

**Note:** Prediction is from genomic data supported up to the 6th granulin module inclusively. Sequence is given from start codon to stop codon.

**Derivation:** NCBI trace gnlltil1154271397 and wgs AEF01039898.1

```
ATGATGCGTCCGGCGGTCTGTGGCCGCGCTGCTGACTGCCGTGGCCGGCAGCATCATGTGCCCCGACGGAC
ACCACTGCCCCGACGCTGACACGTGCTGCTTGTCCGCCGAGCAGGGATACGGCTGCTGCCCCCTGCCCGC
GGCCGTGTGCTGCTCGGACGGGTGCACTGCTGCCCTTCGGGGACCGTTTTCGATTTGGCCACGGGATG
TGCCAGAAGGGGAAAATATCCGTGCCCTGGCTGGAGAAGACGCCGACGTTTACGCCACGAAATAAGCAGT
GTCCGGACGGGACGTCTGTGGGGACGACGCCACCTGCTGCCCGTTGGCCTCGGGACAATAACGGCTGCTG
CTCCCTGGAGGACGTGTCTGCTGCAGCGACTACCTGCACTGCTGCCAAAAAACACGATGTGTGACTTG
AAGCTTGGAAAAGTGCCTTACGGCAAGTTGTCCATTCCGTGGGTGAGCAAGTACCCTTCCAAGCAGGCGG
CTTCTGACGTGCAGTGCATGCCCTTACCAGCTGCTCCGATCAGAACACCTGTTGCATACTCCCGTCAGG
CCAATGGGGCTGCTGCCCTCTTCCAAAGGCCGTGTGCTGCGACGATAAGGAGCACTGCTGCCCAGAAGGC
ACGATATGCAACGTGACGTGCGACAGCTGCAACCATGCCGCCCTCAGCCTGCCCTGGAGCACCAAGACGC
CGGCCCTCAGAATGACGGGAGAGCCCAACGATGTGACGTGCGACGATCTGGTCGGCTGTCCCAGCGGGAA
CACCTGCTGCAAGACGCCGGGGGAGACTGGGCCTGCTGCCCTCTCGTGAAGGCCGTGTGCTGCGACGAC
CACGAGCACTGCTGCCCGCAAGGCACCACGTGTAACCTGCCGGCGCAGACGTGCGATCAAGGCACCCTCA
GCCTCCCCTGGAGCACCAAGACGCCGGCCCTCAGAGTGGCGGGAGAGCCCAACGTCGTGATTTGTGACGA
TCAGTCCAGCTGTCCGGACGGGAACACGTGCTGCAAGACGCCGGGGGAGACTGGGCCTGCTGCCCTCTT
GTGAAGGCCGTGTGCTGCGACGACCACGAGCACTGCTGCCCGCAAGGCACCACGTGTAACCTGCCGGCGC
AGACGTGCGATCAAGGCACCCTCAGCCTCCCCTGGAGCACCAAGACGCCGGCCCTCAGAGTGGCGGGAGA
GCCCAACGTCGTGATTTGTGACGATCAGTCCAGCTGTCCCGACGGGAACACGTGCTGCAAGATGCCCAGC
GGAGATTGGGGCTGCTGCCCTCTGCCAAAGGCCGTGTGCTGCGACGACCACCAGCACTGCTGCCCGGAA
GCACCACGTGTAACCTGCCAGTTGAACGCTGCGACAAAGGCACCCTCAGCCTGCCCTGGAGCACCAAGAC
TCCGGCCCTCAGAGTGGCGGGAGAGCCGAACGTCGTGATTTGTGACGATCAGTTCAGCTGTCCCGACGGG
AACACGTGCTGCAAGTTGCCGAGCGGAGACTGGGGCTGCTGCCCTCTTGTGAAGGCCGTGTGCTGCGACG
ACCACGAGCACTGCTGCCCGCAAGGCACCACGTGTAACCTGCCGGCGCAGACGTGCGATCAAGGCACCCT
CAGCCTGCCCTGGAGCACCAAGACGCCGGCCCTCAGAGTGGCGGGAGAGCCCAACGTCGTGATTTGTGAC
GATCAGTTCAGCTGTCTGACGGGGACACGTGCTGCAAGATGCCCAGCGGAGATTGGGGCTGCTGCCCTC
TCGTGAAGGCCGTGTGCTGCGACGACCACGAGCACTGCTGCCCGCAAGGCACCACGTGTAACCTGCCGGC
GCAGACGTGCGACAAAGGTGCCCTCAGCCTGCCCTGGAGCACCAAGACGCCGGCCCTCAGAGTGGCGGGA
GAGCCCAACGATGTGAAGTGCAGCAGTCAAGTCACTGCTGACCAAAACACGTGCTGCAAGACGGGAA
CCGGAGACTGGGGCTGCTGCCCTCTCGTGAAGGCCGTGTGCTGCGACGACCACGAGCACTGCTGCCCGCA
AGGCACGACGTGCAATGTGCCGGCGGGCTCGTGCAGCAGGGGCAGCTCTCCCTGCCCTGGAGCTCCAAG
ACTCCGGCCAGGACGCGTCTCACCAGCGCTGCTGCCCGCGTCTGCCCGGGCGCGGGGGGACGCTGCGGT
GCGACTCGGCCACGCTGCCCGACGGCACCACCTGCTGCCAGTCCCAGGGGCAGTGGGGCTGCTG
CCCCTTACCCTGACCACCTGCTGCAGCGACTTTTGTGCACTGCTGCCCGAGCGGTTACACGTGTGACCTG
GCACAGGCGAGCTGCATCAAGAAAGCCCATTTCCCTCACCTGGGCCCCCAAGCCCTGCCAAGGCCAGGC
CCGCTCAGGTCTTTGACCTGCTGTAA
```

**cDNA data:**

**From:** NCBI est: Contig of GI:(166881187, 83671489, 51789102, 51795078)

**Note:** In this cDNA contig, gi:51795078 chosen over long-range gi:83671489 to preserve the correct reading frame.

```
GGCAAGTGGAAAGACGTCTGTGGTGGTGTGAGCCTTGA AAAACTGTCCCCCTCTCACGTCTCCAAGATG
ATGCGTCCGGCGGTCTGTGGCCGCGCTGCTGACTGCCGTGGCCGGCAGCATCATGTGCCCCGACGGACAGC
AGTCCCCGACGGCAACACGTGCTGCTTGTCCGCCGAGCAGGGATACGGCTGCTGCCCCCTGCCCGCGGC
CGTGTGCTGCTCGGACGGGCTGCACTGCTGCCCTTCGGGGACCGTTTTCGATTTGGCCACGGGATGTGC
CAGAAGGGGAAAATATCCGTGCCCTGGCTGGAGAAGACGCCGACGTTTATGCCACGAAATAAGCAGTGTG
CGGACGGGACGTCTGTGTGGGGACGACGCCACCTGCTGCCCGTTGGCCTCGGGACAATAACGGCTGCTGCTC
CCTGGAGGACGCTGTCTGCTGCAGCGACTACCTGCACTGCTGCCAAAAAACACGATGTGTGACTTGAAG
CTTGGAAAAGTGCCTTACGGCAAGTTGTCCATTCCGTGGGTGAGCAAGTACCCTTCCAAGCAGGCGGCTT
CTGACGTGCAGTGCATGCCCTTACCAGCTGCTCCGATCAGAACACCTGTTGCATACTCCCGTCAGGCCA
ATGGGGCTGCTGCCCTCTTCCAAAGGCCGTGTGCTGCGACGATAAGGAGCACTGCTGCCCAGAAGGCACG
ATATGCAACGTGACGTGCGACAGCTGCAACCATGCCGCCCTCAGCCTGCCCTGGAGCACCAAGACGCCGG
CCCTCAGAAATGACGGGAGAGCCCAACGATGTGACGTGCGACGATCTGGTCGGCTGTCCCAGCGGGAAAC
CTGCTGCAAGACGCCGGGGGAGACTGGGCCTGCTGCCCTCTCGTGAAGGCCGTGTGCTGCGACGACCAC
GAGCACTGCTGCCCGCAAGGCACCACGTGTAACCTGCCGGCGCAGACGTGCGATCAAGGCACCCTCAGCC
TCCCTGGAGCACCAAGACGCCGGCCCTCAGAGTGGCGGGAGAGCCCAACGTCGTGATTTGTGACGATCA
GTCCAGCTGTCCGGACGGGAACACGTGCTGCAAGACGCCGGGGGAGACTGGGCCTGCTGCCCTCTTGTG
```

AAGGCCGTGTGCTGCGACGACCACGAGCACTGCTGCCCCGAAGGCACCACGTGTAACCTGCCGGCGCAGA  
CGTGCGATCAAGGCACCATCAGCCTCCCCTGGAGACCAAGACGCCGGCCCTCAGAGTGGCGGGAGAGCC  
CAACGTCGTGATTTGTGACGATCAGTCCAGCTGTCCCAGCGGGAACACGTGCTGCAAGATGCCACGCGGA  
GATTGGGGTGTGCTGCCCTCTGCCAAAAGGCCGTGTGCTGCGACGACCACCAGCACTGCTGCCCGAAGGCA  
CCACGTGTAACCTGCCAGTTGAACGCTGCGACAAAAGGCACCCTCAGCCTGCCCTGGAACACCAAGACTCC  
GGCCCTC

**Genomic data:**

**Note:** Genomic sequences mostly in gi:307985015 gb:AEFG01039898.1. First coding exon in trace archive sequence gnlltil1154271397 PMAC-aan86d01.b1.

From NCBI trace: gnlltil1154271397 PMAC-aan86d01.b1

**Coding exon 1 Exon type: sn**

**Note:** from the start codon within that exon.

ATGATGCGTCCGGCGGTCTGTGGCCGCGCTGCTGACTGCCGTGGCCGGCAGCATCATGTGCCCCGACGGAC  
ACCACGTCCCCGACGCTGACACGTGCTGCTTGTCCGCCGAGCAGGGATACGGCTGCTGCCCTGCCCCG  
G

From NCBI wgs: AEFG01039898.1 GI:307985015

**Coding exon 2 Exon type: c**

GCCGTGTGTGCTCGGACGGGCTGCACTGCTGCCCTTCGGGGACCGTTTTCGATTGGCCACGGGATGT  
GCCAGAAAGGGGAAAATATCCGTGCCCTGGCTGGAGAAAGACGCCGACGTTTACGCCACGAAATAAGCAG

**Coding exon 3 Exon type: n**

TGTCCGGACGGGACGTCGTGTGGGGACGACGCCACCTGCTGCCGTTGGCCTCGGGACAATACGGCTGCT  
GCTCCCTGGAGGAC

**Coding exon 4 Exon type: cn**

GCTGTCTGTGCGACGACTACCTGCACTGCTGCCCAAAAAACACGATGTGTGACTTGAAGCTTGGAAAGT  
GCGTTACGGCAAGTTTGTCCATTCCGTGGGTGAGCAAGTACCCCTTCCAAGCAGGCGGCTTCTGACGTGCA  
GTGCGATGCCTTACCAGCTGCTCCGATCAGAACACCTGTTGCATACTCCCGTCAGGGCCAATGGGGCTGC  
TGCCCTTCCAAAG

**Coding exon 5 Exon type: cn**

**Note:** Splice donor aaglgcgagt supported by cDNA data.

GCCGTGTGTGCGACGATAAGGAGCACTGCTGCCCAAGGCACGATATGCAACGTGACGTGCGCAGACGT  
GCAACCATGCCGCCCTCAGCCTGCCCTGGAGACCAAGACGCCGGCCCTCAGAATGACGGGAGAGCCCAA  
CGATGTGCAGTGCGACGATCTGGTCCGGCTGTCCCGACGGGAACACCTGCTGCAAGACGCCGGGGGGAGAC  
TGGGCTGCTGCCCTCTCGTGAAAG

**Coding exon 6 Exon type: cn**

**Note:** Splice donor aaglgcgagt supported by cDNA data.

GCCGTGTGTGCGACGACCACGAGCACTGCTGCCCGAAGGCACCACGTGTAACCTGCCGGCGCAGACGT  
GCGATCAAGGCACCCTCAGCCTCCCCTGGAGACCAAGACGCCGGCCCTCAGAGTGGCGGGAGAGCCCAA  
CGTCGTGATTTGTGACGATCAGTCCAGCTGTCCGGACGGGAACACGTGCTGCAAGACGCCGGGGGGAGAC  
TGGGCTGCTGCCCTCTTGTAAG

**Coding exon 7 Exon type: cn**

GCCGTGTGTGCGACGACCACGAGCACTGCTGCCCGAAGGCACCACGTGTAACCTGCCGGCGCAGACGT  
GCGATCAAGGCACCCTCAGCCTCCCCTGGAGACCAAGACGCCGGCCCTCAGAGTGGCGGGAGAGCCCAA  
CGTCGTGATTTGTGACGATCAGTCCAGCTGTCCCGACGGGAACACGTGCTGCAAGATGCCAGCGGAGAT  
TGGGGCTGCTGCCCTCTGCCAAAG

**Coding exon 8 Exon type: cn**

**Note:** cDNA data does not yet go beyond the middle of this exon.

GCCGTGTGTGCGACGACCACCAGCACTGCTGCCCGAAGGCACCACGTGTAACCTGCCAGTTGAACGCT  
GCGACAAAAGGCACCCTCAGCCTGCCCTGGAGACCAAGACTCCGGCCCTCAGAGTGGCGGGAGAGCCGAA  
CGTCGTGATTTGTGACGATCAGTTCAGCTGTCCCGACGGGAACACGTGCTGCAAGTTGCCGAGCGGAGAC  
TGGGGCTGCTGCCCTCTTGTAAG

**Coding exon 9 Exon type: cn**

GCCGTGTGTGCGACGACCACGAGCACTGCTGCCCGAAGGCACCACGTGTAACCTGCCGGCGCAGACGT

GCGATCAAGGCACCTCAGCCTGCCCTGGAGCACCAAGACGCCGGCCCTCAGAGTGGCGGGAGAGCCCAA  
CGTCGTGATTTGTGACGATCAGTTCAGCTGTCTGACGGGGACACGTGTGCAAGATGCCAGCGGAGAT  
TGGGGCTGTGCCCTCTCGTGAAG

**Coding exon 10 Exon type: cn**

GCCGTGTGTGCGACGACCACGAGCACTGCTGCCCGCAAGGCACCACGTGTAACCTGCCGGCGCAGACGT  
GCGACAAAGGTGCCCTCAGCTGCCCTGGAGCACCAAGACGCCGGCCCTCAGAGTGGCGGGAGAGCCCAA  
CGATGTGAAGTGCACGATCAGTTCAGCTGTCTGACCAAACACGTGTGCAAGACGGGAACCGGAGAC  
TGGGGCTGTGCCCTCTCGTGAAG

**Coding exon 11 Exon type: cn**

GCCGTCTGTGCGACGACCACGAGCACTGCTGCCCCGAAGGCACGACGTGCAATGTGCCGGCGGGCTCGT  
GCGACCAGGGGCGAGCTCTCCCTGCCCTGGAGCTCCAAGACTCCGGCCAGGACGCGTCTCACCGCGCTGCT  
GCCCGCTGTGCCCGGGCGCGGGGGCAGCGTGGGTGCGACTCGGCCCTACGCCCTGCCCCGACGGCACC  
ACCTGCTGCCAGTCCCGCAGGGGCAGTGGGGCTGCTGCCCCCTTACCGCTG

**Coding exon 12 Exon type: c**

**Note:** up to the stop codon.

GCCACCTGTGCGAGCACTTTGTGCACTGCTGCCCGAGCGGTTACACGTGTGACCTGGCACAGGGCAGCT  
GCATCAAGAAGCCCCATTTCTCACCTGGGCCCCCAAAGCCCTGCCAAGGCCAGGCCCGCTCAGGTCTT  
TGACCTGCTGTAA

**Genomic sequence note:** A genomic sequence is not presented (see note 2 in header).

---

00030 **R. esox progranulin C** Short name: **R\_esoC (obsolete Re1)** Date entered: 2014-03

**Species:** *Rhamphochromis esox* (Tigerfish)

**Taxonomy (via NCBI):** Eukaryota; Metazoa; Chordata; Craniata; Vertebrata; Euteleostomi; Actinopterygii; Neopterygii; Teleostei; Euteleostei; Neoteleostei; Acanthomorpha; Acanthopterygii; Percomorpha; Perciformes; Labroidei; Cichlidae; African cichlids; Pseudocrenilabrinae; Haplochromini; Rhamphochromis.

**General Comment:** No cDNA data, but defined by genomic sequence. Typical of several African cichlid small form progranulins for which cDNA sequence data are available. Our old name for it, Re1, followed from the early Dr1, 2 for zebrafish small forms. Now the relationship to the small fish C forms is more evident.

**Protein Sequence**

MSGITLWLSVGMFVWGFASCSITCPDESICPDDCTCCKTAHGYSCLYPNAMCCADLLHCCPSGYRCNLV  
TMNCEKLDQPWLIIIPMVKKEAAEKPAPELSGTPQLQELKESHVPDQIKKSVVYCDSTYCPDGTTCRRHP  
QGGWTCPPYSPGKCLLDGYHCCPIGFDCDRTYQHCVREKLTYPFLRKPALPSGPASFIPITSEDKEN\*

**Transcript:**

**Note:** The prediction is well supported by cDNA data from closely related African cichlids (many of which have no genomic data).

**Predicted sequence:**

**Note:** from start codon to stop codon.

**Derivation:**

ATGTCGGGGATCACTCTGTGGCTGTCAGTTGGTATGTTTGTGTGGGGATTTGCTTCATGCTCCATCACAT  
GTCCTGATGAGAGTCTTTGTCCAGATGACTGTACCTGCTGCAAGACTGCCATGGATATAGCTGTGTCT  
ATATCCAAATGCCATGTGTGCGCCGACCTGCTCCACTGCTGCCCTTCGGGATATCGCTGTAACCTGGTT  
ACCATGAATTGTGAGAAATTAGACCAGCCGTGGCTGATCATACCCATGGTGAAGAAGGAGGCTGCGGAGA  
AACCAGCCCCCTGAACTGTCTGGAACCTCACTCCAGGAGCTTAAAGAGAGCCACGTCCAGATCAAAT  
AAAGAAATCAGTGGTCTACTGTGACAGTTACACCTACTGTCTGATGGCACTACTTGTGCTGACAGACCCCA  
CAAGGAGGCTGGACCTGTTGTCCCTACTCTCTGGCAAATGTTGTCTGGATGGCTACCACTGTGTCCAA  
TTGGATTTGACTGTGACCGAACCTACCAGCACTGTGTGAGGAAAAAATCACATATCCTTTCTCCGCAA  
GCCAGCACTACCTTCAGGACCTGCGTCTTCATCCCAACTTCAGAGGACAAAGAAAAGTAG

**cDNA data:**

**cDNA sequence data:** No cDNA data (or empty cDNA entry).

## Genomic data:

**Note:** Genomic data (exons).

From NCBI: ABPN01000900.1 GI:192381634

**Note:** Good sequence for exons 1 and 2 starting at base 4678

### Coding exon 1 Exon type: sn

ATGTCGGGGATCACTCTGTGGCTGTCAGTTGGTATGTTTGTGTGGGGATTTGCTTCATGCTCCATCACAT  
GTCCTGATGAGAGTCTTTGTCCAGATGACTGTACCTGCTGCAAGACTGCCCATGGATATAGCTGCTGTCT  
ATATCCAAAT

### Coding exon 2 Exon type: cn

GCCATGTGCTGCGCCGACCTGCTCCACTGCTGCCCTTCGGGATATCGCTGTAACCTGGTTACCATGAATT  
GTGAGAAATTAGACCAGCCGTGGCTGATCATACCCATGGTGAAGAAGGAGGCTGCGGAGAAACCAGCCCC  
CCCTGAAGTGTCTGGAAGTCCACTCCAGGAGCTTAAAGAGAGCCAGTCCCAGATCAAATAAGAAATCA  
GTGGTCTACTGTGACAGTTACACCTACTGTCTGATGGCACTACTTGCTGCAGACACCCACAAGGAGGCT  
GGACCTGTTGTCCCTACTCTCCT

From NCBI: ABPN01057103.1 GI:191618541

**Note:** This wgs sequence overlaps ABPN01000900.1 and extends it far enough to capture the last coding exon. The overlap includes coding exon 2, but is not as reliable as ABPN01000900.1 in that region.

### Coding exon 3 Exon type: c

**Note:** Up to the stop codon

GGCAAATGTTTGTCTGGATGGCTACCACTGCTGTCCAATTGGATTTGACTGTGACCCGAACCTACCAGCACT  
GTGTGAGGGAAAACTCACATATCCTTTCCCTCCGCAAGCCAGCACTACCTTCAGGACCTGCGTCCCTTCAT  
CCCAACTTCAGAGGACAAAGAAAACTAG

**Genomic sequence note:** A genomic sequence is not presented (see note 2 in header).

---

00048 **S. kowalevskii progranulin** Short name: **S\_kow** Date entered: 2015-03

**Species:** *Saccoglossus kowalevskii* (

**Taxonomy (via NCBI):** Eukaryota; Metazoa; Hemichordata; Enteropneusta; Harrimaniidae; Saccoglossus.

**General Comment:** The current prediction in the NCBI database, [gil585702646|reflXM\\_002739948.2|](#) is incomplete and includes an error. Separately, genomic and cDNA data are insufficient to provide a likely complete transcript sequence prediction, but combined data appear to define the full coding sequence. The first half of the gene encodes 5 nearly identical modules. Since there are large gaps in genomic sequence, it is possible that one has been missed. The cDNA sequence from EST data picks up most of the last 2 repeats, and continues to the poly-A tail. It provides some data missing in a genomic gap, and offers a convincing overlap..

## Protein Sequence

MILLFITFMVLSHAIASPLYFTPSELNSMLCPDGKSQCPDGSTCCKLTSGEWGCCPMLKAVCCSDGLHCC  
PNGTTCDVSRGKCNKGEFSMQVWKKTRSIPADSI LCPDGKSQCPDGNTCCKLKTGEYGCCPLPKAVCCSD  
GLHCCPNGTTCDV SQGKCNKGDF SMPWVKKTLATPTNSILCPDGQSQCPDGSTCCKLSTGEWGCCPLPKA  
VCCSDGLHCCPSGTTCDV SQGKCNKGDF SMPWVKKTLATPTNSILCPDGQSQCPDGSTCCKLSTGQWGCC  
PLPKAACSDGLHCCPNGTTCDV SQGKCNKGDF SMPWVKKTLATPTNSILCPDGQSQCPDGSTCCKLSTG  
EWGCCPLPKAVCCSDGLHCCPSGTTCDV SQGKCNKGDF SMPWVKKTLATPTNSILCPDGQSQCPDGSTCC  
KLSTGQWGCCPLPKAVCCSDGLHCCPSGTTCDV SQGKCNKGDF SMPWVKKTLALRNVDVISSVNDVISSV  
NDVISSVNDVISSVNDVTCKGGKQKCPDGNTCC EASGLFGCCPF PDAVCCVDQQHCCPQGF TCDLQQT  
CIKGLSLGLPLMKKTMQNVEVVVCPGGKQECPSQMTCCSVHRDLYGCCPVPDAVCCDDKIHCCKP  
DYTKDSRCLNGDINLPLMERVSAKYTHKVESVMCPDGQSECPDGSTCCILASGQYGCCPLPKAVCCDDH  
QHCCP  
NGYKCDTAGGSCQKGDDAIPWLKKNHSIPMSGNVKQD GSECPDGSTCCKLPTGDYGCCPYLDAVCCNDG  
LHCCPKGYTCNTKEGTCQKASINMLPWVKSSEGLVDLVTCPDKAKCPDKTTCQQLPSDKYACCP  
LEHAIC  
CEDKIHCCKPDYLTCDMPSGKCVRKSIIISIPWMEKIPTLIELCDVDVCPDGTLTGCLSGQTCTATT  
SGQYNC  
CPMPNAVSCDGGEHCCPHGYACDKHQGCLEMDNVPLSSVQLP\*

## Transcript:

**Note:** Sequence assembly indicates variability in the length of a short repeat encoding  
DVISSVNDVISSVNDVISSVNDVISSVN after the 6th module.

## Predicted sequence:

**Note:** Transcript prediction is from combined genomic and EST data

**Derivation:** Genomic WGS and transcript EST data further defined in this entry.

ATGATTTTGTATTTCATTACATTCATGGTGTCTGCGCATGCTATTGCTTCTCCTTTGTATTTTACCCCGA  
GTGAATTAACCTCTATGTTATGTCCGGATGGAAAGTCTCAATGTCCAGATGGAAAGTACATGTTGTAAATT  
GACCAGTGGAGAAATGGGGATGCTGTCCAATGCTAAAGGCAGTATGCTGCTCTGATGGTCTACATTGCTGT  
CCTAATGGTACAACATGTGATGTTTCTCGGGTAAATGTAATAAGGGTGAATTTAGTATGCAATGGGTCA  
AGAAAACACGATCAATCCCCGCTGACTCTATCTTGTGTCTGATGGTAAATCCCAATGTCCAGATGGCAA  
CACGTGCTGTAAGCTGAAAACGGAGAGTATGGGTGTTGTCTTTACCCAAGGCTGTATGCTGCTCTGAT  
GGTCTACATTGCTGTCTAATGGTACAACATGTGATGTTTCTCAGGGTAAATGTAATAAGGGTGACTTCA  
GTATGCCGTGGGTCAAGAAAACCTTAGCCACACCAACAAATTTCTATATTGTGTCTGATGGTCTAGTCTCA  
ATGTCCAGATGGAAAGCACTTGTGCAAACCTGTCGACGGGTGAATGGGGATGTTGTCCCTTACCCAAGGCT  
GTATGCTGCTCTGATGGTCTACATTGCTGTCTAGTGGTACAACATGTGATGTTTCTCAGGGTAAATGTA  
ATAAGGGTGACTTCAGTATGCCATGGGTCAAGAAAACCTTAGCCACACCAACAAATTTCTATATTGTGTCC  
TGATGGTCACTCAATGTCCAGATGGAAAGCACTTGTGCAAACCTGTCGACTGGTCAATGGGGATGTTGT  
CCATTACCCAAGGCTGCATGCTGCTCTGATGGTCTACATTGCTGTCTAATGGTACAACATGTGATGTTT  
CTCAGGGTAAATGTAATAAGGGTGACTTCAGTATGCCATGGGTCAAGAAAACCTTAGCCACACCAACAAA  
TTCTATATTGTGTCTGATGGTCTAGTCTCAATGTCCAGATGGAAAGCACTTGTGCAAACCTGTCGACGGGT  
GAATGGGGATGTTGTCCCTTACCCAAGGCTGTATGCTGCTCTGATGGTCTACATTGCTGTCTAGTGGTA  
CAACATGTGATGTTTCTCAGGGTAAATGTAATAAGGGTGACTTCAGTATGCCATGGGTCAAGAAAACCTT  
AGCCACACCAACAAATTTCTATATTGTGTCTGATGGTCACTCAATGTCCAGATGGGAGCACTTGTGTC  
AACTGTCAACCGGTCAATGGGGATGTTGTCTTTACCCAAGGCTGTATGCTGCTCTGATGGTCTACATT  
GCTGTCTAGTGGTACAACATGTGATGATTCTCAGGGTAAATGTAATAAGGGTGACTTCAGTATGCCATG  
GGTCAAGAAAACATTGGCATTAAAGAAATGTTGATGTCATCTCTAGTGTAAATGATGTCATCTCTAGTGTT  
AATGATGTCATCTCTAGTGTAAATGATGTCATCTCTAGTGTAAATGATGTCACATGTAAGGAGGCAAGC  
AGAAGTGCCCTGACGGGAATACGTGTTGTGAAGAAGCAAGTGGTTTGTGGTTGTTGTCCATTTCCAGA  
TGCCGTTTGTGTTGATCAACAACATTGTTGTCCACAAGGATTTACATGTGATTTACAACAAAACAAAG  
TGTATTAAGGGTCTTTAGGATTGCCCTAATGAAGAAAACCATGGCTCAGAATGTTGAAGTTGTTGTAT  
GCCCTGGTGGTAAACAGGAATGCCCTCACAGATGACTTGTGTTTCACTGCTGTCCAAAAGACTATAACATGTAAG  
TTGTCGGTGCCTGATGCGGTTTGTGATGACAAAATTCAGTGTCTCCAAAAGACTATAACATGTAAG  
GATAGCCGCTGTCTTAATGGAGATATTAACCTGCCGATGTTGGAACGTGTCTCGGCTAAAATACCCCACA  
AAGTAGAGTCAGTGTGCCCAGATGGTCACTGAGTGTCCAGATGGGAGCACATGTTGTATATTAGC  
CAGTGGTCAATATGGATGCTGTCTTTACCAAAGGCTGTATGTTGTGATGATCACCAACACTGTTGTCT  
AATGGCTACAAATGTGACACGGCAGGAGGATCATGTCAGAAAAGGAGATGACGCCATACCCTGGTTAAAGA  
AACACAATTTCTATTCGATGTCTGGTAACGTAAAGTGCCAGGATGGTTCAGAGTGTCTAGTGGTAGTAC  
ATGCTGTAAACTGCCACTGGGACTATGGCTGCTGCCATATCTTGATGCTGTCTGCTGCAACGATGGT  
CTACATTGTTGTCTAAAGGTTATACTTGTAAATACCAAGGAAGGAACGTGTCAAAGGCATCAATTAATA  
TGTTGCCCTGGGTGAAGAGTTTCAAGAGTCTGGTTGATCTGGTTACCTGCCCTGACAAGGCAAAAATGTCC  
TGATAAAACGACATGTTGTCAGTTGCCATCTGACAAGTATGCCGCTGTCTCCATTAGAACATGCTATTTGT  
TGCGAGGATAAGATACTGCTGCTCCAGATTATTTGACATGTGACATGCCATCTGGAAAAGTGTGTTTCGCA  
AATCCATCATATCTATTCATGGATGGAGAAAAATCCCTACACTTATAGAATTATGTGATGTGGATGTTT  
TCCAGATGGTCTGACAGGTTGCTGAGTGGGCAGACTTGCACAGCTACAACCTCTGGACAATATAACTGC  
TGTCTATGCCAAATGCTGTCTCTTGTGATGGTGGTGAACACTGTTGTCCCATGGTTACGCATGTGATA  
AACACCAAGGATGTTTAGAAAATGGATAATGTTCCCTATCTTCAGTACAGCTACCATAGTAACATCTGTT  
TTTGCAAAAATGTCTTTATCGAGGGAATAAATTTGAGAAGGCATAAATGTATATTTTTTGTGATGATAA  
TTTTTTTTTACATTTTTGGCATTATTTTCTGTGCAAAATAGACTATTGTAGTTATTCAGAATGTTGCACTA  
AATTTTTGAGCATATCTGGGACTTCTTATGTTGCAGTACAGCACCCCTCAGGTGTTTAAATTTGTGTAATTAC  
TTTGTCTGTTGACCTTAAGGTGGTATTGTGAACATTAGACAAAATCACTGCTAAAAGATTAACCATTTCC  
CAAAATATCACTTCTGTTTTTAAAAAAAATGTAATAAAGTAATCCATCAATTAATAAATTTGTACAATCTT  
CGATATCGAGATCCATGTTAAGAAATGTTGGCATTTCAGATATGATCACATGACATGTATATAAATATCGAAA  
AATTATGCATTTCAAATAAACCATGGAGGGAATACTTTTGTGATATTTGAGGGCTCGTACTACATACC  
ATAGCATGTCTGTTTTGATCAATAAGCTTCCCATGTGTATTGATATTTGGTAATGAATTTTCCATATAC  
AAATAAAGGTGACTTGGACAATCTATCAAGAAAAGTAGCTTAATATTCTGTCTAGTGTCCACTCTTTAT  
GCATGCCACTAATACCTGGAATATGTGGTGTCTACTACTCCACTAATGCCTAAAAATCTATGTGGTGTCT  
ATAGTATACACACAATAATGCCTAGAATCTGTGATGTTCCACCCTCAATATGCCAAAAACACACAAGATT  
CTGTGCCATGATTGGTCAATACGTAAAACGCAAGGTTGTATAGAATTACACGGTCAACCTTGCATAATG  
AACTAATGGAAAATAGTCAACAGATTATTCCTCATTGCATATCGAAAATTCATGTTTTCTACCTTTAGCA  
TGTCCATGTTTTGACCGATTTAGTATCTGGTGGGATTTACAAATGTGATAAAAACTAATAAATATTTTTG  
TTTTAAATTTGTGNCATTAATAAAAAAAAAAAAAA

### cDNA data:

**From:** NCBI est: Contig of GI:(187124962, 187100237, 187162181, 187051231, 187141477, 187167824, 187118922, 187202484, 187195250, 187094534, 187182439, 187220035, 187094072, 187092896, 187048843, 187071460, 187064262, 187162180, 187195249, 187066975, 187100236, 187096627, 187047420, 187167823)

**Note:** Provides a partial transcript missing the beginning. One Cap 3 assembly ambiguity showed an additional 2 codons in some transcripts. The translations affect the amino acid sequence PWMEKIPTLIDYV(NV)DVCP, where the difference is in parenthesis. This contig has the shorter VISSVND repeat. The transcript with a longer repeat is represented by a contig which includes EST sequences GI:187167982, 187051231.

```
CTTGTTCGAAAACGTCGACGGGTGAATGGGGATGTTGTCCTTACCCAAGGCTGTATGCTGCTCTGATGG
TCTACATTGCTGTCTAGTGGTACAACATGTGATGTTTCTCAGGGTAAATGTAATAAGGGTGACTTCAGT
ATGCCATGGGTCAAGAAAACCTTTAGCCACACCAACAAATTTCTATATTGTGTCCTGATGGTCAGTCTCAAT
GTCCAGATGGGAGCACTTGTTCGAAAACGTCACACCGGTCAATGGGGATGTTGTCCTTTACCCAAGGCTGT
ATGCTGCTCTGATGGTCTACATTGCTGTCTAGTGGTACAACATGTGATGTTTCTCAGGGTAAATGTAAT
AAGGGTGACTTCAGTATGCCATGGGTCAAGAAAACATTGGCATTAAAGAAATGTTGATGTCATCTCTAGTG
TTAATGATGTCATCTCTAGTGTTAATGATGTCATCTCTAGTGTTAATGATGTCACATGTAAAGGAGGCAA
GCAGAAGTGCCCTGACGGGAATACGTGTTGTGAAGAAGCAAGTGGTTTGGTTGTTGTTGTTGCCATTTCCA
GATGCCGTTTGTGTTGATCAACAACATTGTTGTCCACAAGGATTTACATGTGATTTACAACAACAAACAA
AGTGTATTTAAAGGGTCTTTAGGATTGCCCTAATGAAGAAAACCATGGCTCAGAATGTTGAAGTTGTTGT
ATGCCCTGGTGGTAAACAGGAATGCCCTCACAGATGACTTGTGTTTTCAGTACACGGAGATTTATATGGA
TGTGTTGCCGTGCTGATGCGGTTTGTGTTGATGACAAAATTCAGTGTCTCCAAAAGACTATAACGTGTA
AGGATAGCCGCTGTCTTAATGGAGATATTAACCTTGCCGATGTTGGAACGTGTCTCGGCTAAAATACACCCA
CAAAGTAGAGTCAGTGTGTCAGATGGTTCAGTCTGAGTGTCCAGATGGGAGCACATGTTGTATATTA
GCCAGTGGTCAATATGGATGCTGTCTTTACCAAAGGCTGTATGTTGTGATGATCACCAACACTGTTGTC
CTAATGGCTACAAATGTGACACGGCAGGAGGATCATGTCAGAAAAGGAGATGACGCCATAACCCTGGTTAAA
GAAACACAATTTCTATTCCGATGTCTGGTAACGTAAGTGCCAGGATGGTTCAGAGTGTCTTAGTGGTAGT
ACATGCTGTAAACTGCCTACTGGGGACTATGGCTGCTGCCCATATCTTGATGCTGCTGCTGCAACGATG
GTCTACATTGTTGCTCTAAAGGTTATACTTGTAAATACCAAGGAAGGAACGTGTCAAAAAGGCATCAATTA
TATGTTGCCCTGGGTGAAGAGTTTCAAGAGTCTGGTTGATCTGGTTACCTGCCCTGACAAGGCAAAAATGT
CCTGATAAAAACGACATGTTGTCAGTTGCCATCTGACAAGTATGCCTGCTGTCCATTAGAACATGCTATTT
GTTGCGAGGATAAGATACTGCTGTCCAGATTATTTGACATGTGACATGCCATCTGGAAAAGTGTGTTTCG
CAAATCCATCATATCTATTCCATGGATGGAGAAAATCCCTACACTTATAGAATTATGTGATGTGGATGTT
TGTCAGATGGTCTGACAGGTTGCTGAGTGGGCAGACTTGACACAGCTACAACCTCTGGACAATATAACT
GCTGTCTTATGCCAAATGCTGTCTCTTGTGATGGTGGTGAACACTGTTGTCCCATGGTTACGCATGTGA
TAAACACCAAGGATGTTTAGAAAATGGATAATGTTCCCTATCTTCAGTACAGCTACCATAGTAACATCTG
TTTTTGCAAAATTTGCTTTTATCGAGGGAACTAAAATTTGAGAAGGCATAAATGTATATTTTTTTGTGATGAT
AATTTTTTTTTTACATTTTTTGGCATTATTTTTCTGTGCAAAATAGACTATTGTAGTTATTCAGAATGTTGCAC
TAAATTTTTTGAGCATATCTGGGACTTCTTATGTTGCAGTACAGCACCCCTCAGGTGTTTAAATTTGTGTAATT
ACTTTGTTTCTGTTGTACCTTAAGGTGGTATTGTGAACATTAGACAAAATCACTGCTAAAAGATTAACCATT
CCCAAAATATCACTTCCCTGTTTTTAAAAAAAATGTAATAAAGTAATCCATCAATTAATAATTTGTACAATC
TTCGATATCGAGATCCATGTTAAGAATGTTGGCATTTCAGATATGATCACATGACATGTATATAATATCGA
AAAATTTATGCATTCCAAATAAACCATGGAGGGAATACTTTTTGTTGTATATTGAGGGCTCGCTACTACATA
CCATAGCATGTCTGTTTTGATCAATAAGCTTCCCATGTGTATTGATATTTGGTAATGAATTTTCCATAT
ACAAAATAAAGGTGACTTGGACAATCTATCAAGAAAAGTAGCTTAATATTCTGTCTAGTGTTCCTCTTT
ATGCATGCCACTAATACCTGGAATATGTGGTGTCTACACTCCACTAATGCCTAAAAATCTATGTGGTGAT
CTATAGTATACACACAACCTAATGCCTAGAATCTGTGATGTTCCACCCTCAATATGCCAAAAACACACAAGA
TTCTGTGCCATGATTGGTCAATACGTAAAACACGCAAGGTTGTATAGAATTACACGGTCACCCTTGCATAA
TGAACATAATGGAAAATAGTCAACAGATTATTCCTCATTGCATATCGAAAATTCATGTTTTCTACCTTTAG
CATGTCCATGTTTTGACCGATTTAGTATCTGGTGGAGATTTACAAAATGTGATAAAAACTAATAAATATTT
TGTTTTAAATTTGTGNCATTAATAAAAAAAAAAAAAA
```

### Genomic data:

**Note:** Gaps in the *S. kowalevskii* progranulin gene sequence data from the main NCBI WGS database were partially filled by data from the Trace archive. Although the full genomic sequence was not assembled, we obtained sequence which includes all known exons.

From NCBI wgs: GI:281441650:128282-148110 unplaced genomic scaffold

**Note:** These first 6 exons look good. Downstream are large gaps, and an incomplete granulin exon. The presence of at least one exon in the gaps after the sixth coding exon is shown by cDNA data, which also overlaps the partial exon sequence at the end of this entry.

**Coding exon 1** Exon type: sn

ATGATTTTGTATTTCATTACATTTCATGGTGCTGTCGCATGCTATTGCTTCTCCTTTGTATTTTACCCCGA  
GTGAATTAAGTCTATGTTATGTCCGGATGGAAAGTCTCAATGTCCAGATGGAAAGTACATGTTGTAAATT  
GACCAGTGGAGAATGGGGATGCTGTCCAATGCTAAAG

**Coding exon 2 Exon type: cn**

**Note:** Coding exons 2, 3,4, 5,6 are nearly identical repeats.

GCAGTATGCTGCTCTGATGGTCTACATTGCTGTCCTAATGGTACAACATGTGATGTTTCTCGGGGTAAAT  
GTAATAAGGGTGAATTTAGTATGCAATGGGTCAAGAAAACACGATCAATCCCCGCTGACTCTATCTTGTG  
TCCGTATGGTAAATCCCAATGTCCAGATGGCAACACGTGCTGTAAGCTGAAAACCTGGAGAGTATGGGTGT  
TGTCCTTTACCCAAG

**Coding exon 3 Exon type: cn**

**Note:** Coding exons 2, 3,4, 5,6 are nearly identical repeats.

GCTGTATGCTGCTCTGATGGTCTACATTGCTGTCCTAATGGTACAACATGTGATGTTTCTCAGGGTAAAT  
GTAATAAGGGTGAATTTAGTATGCAATGGGTCAAGAAAACCTTTAGCCACACCAACAAATTTCTATATTGTG  
TCCGTATGGTAAATCCCAATGTCCAGATGGCAACACGTGCTGTAAGCTGAAAACCTGGAGAGTATGGGTGT  
TGTCCTTTACCCAAG

**Coding exon 4 Exon type: cn**

**Note:** Coding exons 2, 3,4, 5,6 are nearly identical repeats.

GCTGTATGCTGCTCTGATGGTCTACATTGCTGTCCTAGTGGTACAACATGTGATGTTTCTCAGGGTAAAT  
GTAATAAGGGTGAATTTAGTATGCAATGGGTCAAGAAAACCTTTAGCCACACCAACAAATTTCTATATTGTG  
TCCGTATGGTAAATCCCAATGTCCAGATGGCAACACGTGCTGTAAGCTGAAAACCTGGAGAGTATGGGTGT  
TGTCCTTTACCCAAG

**Coding exon 5 Exon type: cn**

**Note:** Coding exons 2, 3,4, 5,6 are nearly identical repeats.

GCTGATGCTGCTCTGATGGTCTACATTGCTGTCCTAATGGTACAACATGTGATGTTTCTCAGGGTAAAT  
GTAATAAGGGTGAATTTAGTATGCAATGGGTCAAGAAAACCTTTAGCCACACCAACAAATTTCTATATTGTG  
TCCGTATGGTAAATCCCAATGTCCAGATGGCAACACGTGCTGTAAGCTGAAAACCTGGAGAGTATGGGTGT  
TGTCCTTTACCCAAG

**Coding exon 6 Exon type: cn**

**Note:** Coding exons 2, 3,4, 5,6 are nearly identical repeats.

GCTGTATGCTGCTCTGATGGTCTACATTGCTGTCCTAGTGGTACAACATGTGATGTTTCTCAGGGTAAAT  
GTAATAAGGGTGAATTTAGTATGCAATGGGTCAAGAAAACCTTTAGCCACACCAACAAATTTCTATATTGTG  
TCCGTATGGTAAATCCCAATGTCCAGATGGCAACACGTGCTGTAAGCTGAAAACCTGGAGAGTATGGGTGT  
TGTCCTTTACCCAAG

From NCBI Trace archive of *Saccoglossus kowalevskii* wgs sequences.: Contig of TI:1752672055, 1713392136.

**Note:** This contig overlaps GI:281441650:128282-148110, fills some of the last gap, and completely defines exon 7. Two similar contigs were assembled. This one contains the coding exon 7 with the longer TGACATCATTAACACTAGAGA repeat encoding VISSVND four times. The allelic exon with just three repeats is represented by a contig of TI:1746992008, 1702121647.

**Coding exon 7 Exon type: cnc**

**Note:** The longer coding exon 7 (see comment above).

GCTGTATGCTGCTCTGATGGTCTACATTGCTGTCCTAGTGGTACAACATGTGATGTTTCTCAGGGTAAAT  
GTAATAAGGGTGAATTTAGTATGCAATGGGTCAAGAAAACCTTTGGCATTAAAGAAATGTTGATGTCATCTC  
TAGTGTTAATGATGTCATCTCTAGTGTTAATGATGTCATCTCTAGTGTTAATGATGTCATCTCTAGTGTT  
AATGATGTCACATGTAAGGAGGCAAGCAGAAGTGCCCTGACGGGAATACGTGTTGTGAAGAAGCAAGTG  
GTTTGTGGTGTGTTGTCATTTCAGATGCCGTTTGTGTTGATCAACAACATGTTGTCCACAAGG  
ATTTACATGTGATTTACAACAAAACAAAGTGTATTAAGGGTCTTTAGGATTGCCCTAATGAAGAAAACC  
ATGGCTCAG

From NCBI WGS: GI:255177688 (GB:ACQM01074953.1) *Saccoglossus kowalevskii* Contig75118, whole genome shotgun sequence.

**Note:** This contig contains 4 exons.

**Coding exon 8 Exon type: n**

AATGTTGAAGTTGTTGATGCCCTGGTGGTAAACAGGAATGCCCTCACAGATGACTTGTTGTTTCAGTAC  
ACAGAGATTTATATGGATGTTGTCCGGTGCCCTGAT

**Coding exon 9 Exon type: c**

GCGGTTTGTGTGATGACAAAATTCAGTCTGTCCCAAAGACTATACATGTAAGGATAGCCGCTGTCTTA  
ATGGAGATATTAAGTCCGATGTTGGAACGTGTCTCGGCTAAATACACCCACAAA

**Coding exon 10 Exon type: n**

GTAGAGTCAGTGTGATGATGCCAGATGGTTCAGTCTGAGTGTCCAGATGGGAGCACATGTTGTATATTAGCCA  
GTGGTCAATATGGATGCTGTCCCTTACCAAAG

**Coding exon 11 Exon type: cncn**

GCTGTATGTTGTGATGATCACCACACTGTTGTCCCTAATGGCTACAAAATGTGACACGGCAGGAGGATCAT  
GTCAGAAAAGGAGATGACGCCATACCCTGGTTAAAGAAAACACAATTCCTATTCCGATGTCTGGTAAACGTAAA  
GTGCCAGGATGGTTTCAGAGTGTCTAGTGGTAGTACATGCTGTAAACTGCCTACTGGGGACTATGGCTGC  
TGCCCATATCTTGATGCTGTCTGCTGCAACGATGGTCTACATTGTTGTCCCTAAAGGTTATACTTGTAATA  
CCAAGGAAGGAACGTGTCAAAAAGGCATCAATTAATATGTTGCCCTGGGTGAAGAGTTCAGAAGGTCTGGT  
TGATCTGGTTACCTGCCCTGACAAGGCAAAAATGTCCCTGATAAAAACGACATGTTGTGTCAGTTGCCATCTGAC  
AAGTATGCCTGCTGTCCATTAGAACAT

From NCBI Trace archive of *Saccoglossus kowalevskii* wgs sequences.: Contig of TI:1701193238, 1659660105, 1721786828, 1661741634, 1747024700.

**Note:** This contig overlaps GI:255177688 and also has coding exon 11.

**Coding exon 12 Exon type: cn\***

**Note:** Where n\* represents a 5 Cys N-half module.

GCTATTTGTTGCGAGGATAAGATACACTGCTGTCCAGATTATTTGACATGTGACATGCCATCTGGAAAAGT  
GTGTTTCGAAAATCCATCATATCTATTCCATGGATGGAGAAAAATCCCTACACTTATAGATTATGTGGATGT  
TTGTCCAGATGGTCTGACAGGTTGTCTGAGTGGGCAGACTTGACACAGCTACAACCTCTGGACAATATAAC  
TGCTGTCCCTATGCCAAAAT

From NCBI WGS: GI:255177690 (GB:ACQM01074951.1) *Saccoglossus kowalevskii* Contig75116, whole genome shotgun sequence.

**Note:** This has part of exon 12, so it overlaps with the previous contig of trace archive sequences.

**Coding exon 13 Exon type: c\***

**Note:** Ending at the stop codon. Here c\* indicates a 5 Cys C-half module. The exon also contains all 3'ut which is not shown here.

GCTGTCTTTGTGATGGTGGTGAACACTGTTGTCCCATGGTTACGCATGTGATAAACACCAAGGATGTT  
TAGAAATGGATAATGTTCCCTATCTTCAGTACAGCTACCATAG

**Genomic sequence note:** A genomic sequence is not presented (see note 2 in header).

---

00037 **S. purpuratus progranulin** Short name: **S\_pur** Date entered: 2014-03

**Species:** *Strongylocentrotus purpuratus* (purple sea urchin)

**Taxonomy (via NCBI):** Eukaryota; Metazoa; Echinodermata; Eleutherozoa; Echinozoa; Echinoidea; Euechinoidea; Echinacea; Echinoida; Strongylocentrotidae; Strongylocentrotus.

**General Comment:** The first exon encoding the signal peptide is followed by a large exon encoding 25 modules containing a repeat of 23 nearly identical modules. The first encoded module is different, as is the C-half of the last module. The gene ends with 4 more normal exons n-cn-n-c, so the product would include a paraganulin. Limited EST data confirm splicing from the repeat through the last 4 exons. Three other EST sequences cover short parts of the repeat interior. NOTE: The gene reported as NW\_003580203.1 GI:346417161 is wrong. The DNA sequence starts within the repeat of exon 2, while translation is recorded from an internal Met codon in exon 3.

**Protein Sequence**

MKLVTILVVASLVSLAFGGPLKVEELAKENTCKDGCATTSTCCNDLNNEGCTYPNAVCCSDGRHCCPT  
GYECDVTSNTCIKGNVDMRMLITDLTSNASAVICPDGQSECPDGNTCCKLASGQYGCCPLPNAVCCSDHL  
HCCPSGYTCGVSSGTCTQGESVVPWYEKSSATPVHVENVPCPDGQSECPDGNTCCTLASGQYGCCPLPNA  
VCCSDHLHCCPSGYTCGVSSGTCTQGESVVPWYEKSSATPVHVESVPCPDGQSECPDGNTCCTLASGQYG  
CCPLPNAVCCSDHLHCCPSGYTCGVSSGTCTRGESVVLWYEKSSATPVHVESVPCPDGQSECPDGNTCCK  
LASGQYGCCPLPNAVCCSDHLHCCPSGYTCGVSSGTCTQGESVVPWYEKSSATPVHVESVPCPDGQSECP  
DGNTCCTLASGQYGCCPLPNAVCCSDHLHCCPSGYTCGVSSGTCTQGESVVPWYEKSSATPVHEENVVCP  
DGQSECPDGNTCCKLASGQYGCCPLPNAVCCSDHLHCCPSGYTCGVSSGTCTQGESVVPWYEKSSATPVH  
EENVVPCPDGQSECPDGNTCCKLASGQYGCCPLPNAVCCSDHLHCCPSGYTCGVSSGTCTQGESVVPWYEK



SSATPVLVENVPCPDGQSECPDGNCTCTLASGQYGCCPLPNAVCCSDHLHCCPSGYTCGVSSGTCTRGES  
VVLWYEKSSATPVQVENVPCPDGQSECPDGNCTCKLASGQYGCCPLPNAVCCSDHLHCCPSGYTCGVSSG  
TCTQGESVVPWYEKSSATPVHVENVPCPDGQSECPDGNCTCTLASGQYGCCPLPNAVCCSDHLHCCPSGY  
TCGVSSGTCTQGESVVPWYEKSSATPVHVENVPCPDGQSECPDGNCTCKLASGQYGCCPLPNAVCCSDHL  
HCCPSGYTCGVSSGTCTQGESVSWYEKSAATPVQVKSVICPGGQAQCPDGNCTCKLASGQYGCCPLPNA  
VCCSDHLHCCPSGYTCGVSSGTCTQGESVVLWFEKSAATPVQVESVICPGGQSECPDGNCTCK  
CCPLPNAVCCSDHLHCCPSGYTCGVSSGTCTQGESVVLWFEKSAATPVQVESVICPGGQSECPDGNCTCK  
LASGQYGCCPLPNAVCCSDHLHCCPSGYTCGVSSGTCTQGESVVPWYEKSSATPVHVENVPCPDGQSECP  
DGNCTCKLASGQYGCCPLPNAVCCSDHLHCCPSGYTCGVSSGTCTQGESVSWYEKSAATPVQVESVICP  
GGQAQCPDGNCTCKLASGQYGCCPLPNAVCCSDHLHCCPSGYTCGVSSGTCTQGESVSWYEKSAATPVQ  
VENVPCPDGQSECPDGNCTCKLASGQYGCCPLPNAVCCSDHLHCCPSGYTCGVSSGTCTQGESVVLWYEK  
SAATPVQVESVLCPPGGQSECPDGNCTCKLASGQYGCCPLPNAVCCSDHLHCCPSGYTCGVSSGTCTQGES  
VVPWYEKSSATPVHVENVPCPDGQSECPDGNCTCKLASGQYGCCPLPNAVCCSDHLHCCPSGYTCGVSSG  
TCTQGESVVPWYEKSSATPVQVDSVICPGGQAQCPDGNCTCKLPSGQYGCCPLPNAVCCSDGEHCCPSGY  
TCDVSAGTCTQGESVVLWYEKSSATPVQVESVPCGGQAQCPDGNCTCKLPSGQYGCCPLPNAVCCSDGE  
HCCPSGYTCDVSAGTCTQGESVVPWYEKSSATPVQIESVPCPDGQSECPDGNCTCKLASGQYGCCP  
VCCSDHLHCCPSGYTCDVSAGTCTQGESVVPWYEKSSATPVQIESVPCPDGQSECPDGNCTCKLASGQYG  
CCPLPNAVCCSDGQHCCPSGYTCDVSAGTCTQGESVVPWYEKSSATPVYVESVPCPDGQSECPDGNCTCK  
LASGQYGCCPLPNAVCCSDHLHCCPSGYTCGVSSGTCTRGSSILEWSSKSSARSNVDKLIQITATEPVSIC  
PDSKTSCPSSSTCCPLMASGEWGCCPVHNAVCCDDHIHCCPSGYSCGTNSCQKGMHLPLLSKSTGLLKL  
TFEQEPEPKPEVKVHDNKHLFLQDEPRTGSVICPGGKIECQDGNACLLAGGDYSCCLPQAVSPHEES  
GDKMCPDEISSCPTGSTCCQTPGNIYGCCPYQAAICCSDLIHCCPSDYSCNSSTGTCTKDDHIMPVWGK  
IPPL\*

**Transcript:**

**Note:** Limited cDNA data from EST sequences confirm the exons from the end of the large repeat to the 3' end. The beginning and much of the repeat exon are unconfirmed.

**Predicted sequence:**

**Note:** Predicted from AAGJ04101346.1 (2855-13696, stop-start) reverse complement.

**Derivation:** AAGJ04101346.1 GI:335681100 range:2855-13696

ATGAAGCTGGTACTATCCTTGTGGTGGCTTCTCTTGTGTCAGTGGCATTGGAGGACCCCTGAAGGTGG  
AAGAACTTGCCAAAGAGAATACTTGTAAAGATGGATGTGCTACTACATCAACGTGTTGTAACGACTTGAA  
CAATGAATCAGGATGTTGCACATACCCAAATGCAGTATGCTGCTGATGGTCGCCACTGTTGTCCTACA  
GGTACGAATGTGATGTCACCAGCAACACATGCATAAAAAGGAAATGATGTAATGAGGATGTTGATCACAG  
ATTTAACTAGTAATGCATCTGCTGTAATTTGTCTGATGGCCAATCAGAAATGTCCCGATGGTAATACATG  
TTGCAAACCTTGCTTCTGGCCAATAATGGTTGTGGCCCTCTACCAAATGCAGTTTGTGTTAGTATCATCTT  
CACTGCTGTCCATCAGGATACACTTGTGGTGTATCATCTGGCACATGCACTCAAGGAGAGTCTGTTGTCC  
CTTGGTATGAAAAGTCACTGCCACTCCTGTGCACGTAGAAAATGTTGTATGCTCTGATGGCCAATCAGA  
ATGTCCAGATGGTAATACATGTTGCACACTTGTCTTCTGGCCAATAATGGTTGTGCTCTGCCAAATGCA  
GTGTGTTGTAGTATCATCTTCACTGCTGTCCATCAGGTTACACTTGTGGTGTTCATCTGGCACATGCA  
CACAGGGAGAGTCTGTTGTCCCTTGGTATGAAAAGTCACTGCCACTCCTGTGCACGTAGAAAAGTGTGT  
ATGCCAGATGGCCAATCAGAAATGTCCAGATGGTAATACATGTTGCACACTTGTCTTCTGGCCAATAATGGT  
TGTGCTCTGCCAAATGCAGTGTGTTGTAGTATCATCTTCACTGCTGTCCATCAGGTTACACTTGTG  
GTGTATCATCTGGCACATGCACACGAGGAGAGTCTGTTGTCTTATGGTATGAAAAGTCACTGCCACTCC  
TGTGCACGTAGAAAAGTGTGATGCTCTGATGGCCAATCAGAAATGTCCAGATGGTAATACATGTTGAAA  
CTTGTCTTCTGGCCAATAATGGTTGTGCTCTACCAAATGCAGTGTGTTGTAGTATCATCTTCACTGCT  
GTCCATCAGGATACACTTGTGGTGTATCATCTGGCACATGCACTCAAGGAGAGTCTGTTGTCCCTTGGTA  
TGAAAAGTCACTGCCACTCCTGTGCACGTAGAAAAGTGTGTAATGCTCTGATGGCCAATCAGAAATGTCCA  
GATGGTAATACATGTTGCACACTTGTCTTCTGGCCAATAATGGTTGTGCTCTACCAAATGCAGTGTGTT  
GTAGTATCATCTTCACTGCTGTCCATCAGGATACACTTGTGGTGTATCATCTGGCACATGCACTCAAGG  
AGAGTCTGTTGTCCCTTGGTATGAAAAGTCACTGCCACTCCTGTGCACGAAGAAAATGTTGTATGCTCT  
GATGGCCAATCAGAAATGTCCAGATGGTAATACATGTTGCAAACCTGCTTCTGGCCAATAATGGTTGTGTC  
CTCTACCAAATGCAGTTTGTGTTGTAGTATCATCTTCACTGCTGTCCATCAGGATACACTTGTGGTGTATC  
ATCTGGCACATGCACTCAAGGAGAGTCTGTTGTCCCTTGGTATGAAAAGTCACTGCCACTCCTGTGCAC  
GAAGAAAATGTTGTATGCTCTGATGGCCAATCAGAAATGTCCAGATGGTAATACATGTTGCAAACCTGCTT  
CTGGCCAATAATGGTTGTGCTCTACCAAATGCAGTGTGTTGTAGTATCATCTTCACTGCTGTCCATC  
AGGTTACACTTGTGGTGTTCATCTGGCACATGCACACAGGGAGAGTCTGTTGTCCCTTGGTATGAAAAG  
TCATCTGCCACTCCTGTGCTTGTAGAAAATGTTGTATGCTCTGATGGCCAATCAGAAATGTCCAGATGGTA

ATACATGTTGCACACTTGTCTTCTGGCCAATATGGTTGTTGTCCTCTGCCAAATGCAGTGTGTTGTAGTGA  
TCATCTTACTGCTGTCCATCAGGATACACTTGTGGTGTATCATCTGGCACATGCACACGAGGAGAGTCT  
GTTGTCTTATGGTATGAAAAATCATCTGCCACTCCAGTGCAAGTAGAAAAATGTTGTATGTCCTGATGGCC  
AATCAGAATGTCCAGATGGTAATACATGTTGCAAACCTTGCTTCTGGCCAATATGGTTGTTGTCCTCTACC  
AAATGCAGTGTGTTGTAGTGATCATCTTACTGCTGTCCATCAGGATACACTTGTGGTGTATCATCTGGC  
ACATGCACTCAAGGAGAGTCTGTTGTCCCTTGGTATGAAAAGTCATCTGCCACTCCTGTGCACGTAGAAA  
ATGTTGTATGCCCTGATGGCCAATCAGAATGTCCAGATGGTAATACATGTTGCACACTTGTCTTCTGGCCA  
ATATGGTTGTTGTCCTCTACCAAATGCAGTTTGTGTAGTGATCATCTTACTGCTGTCCATCAGGATAC  
ACTTGTGGTGTATCATCTGGCACATGCACTCAAGGAGAGTCTGTTGTCCCTTGGTATGAAAAGTCATCTG  
CCACTCCTGTGCACGTAGAAAAATGTTGTATGTCCTGATGGCCAATCAGAATGTCCAGATGGTAATACATG  
TTGCAAACCTTGCTTCTGGCCAATATGGTTGTTGTCCTCTACCAAATGCAGTTTGTGTAGTGATCATCTT  
CACTGCTGTCCATCAGGATACACTTGTGGTGTATCATCTGGCACATGCACTCAAGGAGAGTCTGTTGTCT  
CTTGGTATGAAAAGTCAGTGTCCACTCCTGTGCAAGTAAAGAGTGTATCTGTCCAGGAGGCCAAGCACA  
ATGCCAGATGGTAATACATGTTGCAAACCTTGCTTCTGGCCAATATGGTTGTTGTCCTCTGCCAAATGCA  
GTGTGTTGTAGTGATCATCTTACTGCTGTCCATCAGGATACACTTGCAGTGTCTTCTGCAGGAACCTGCA  
CACGAGGAGAGTCTGTTGTCTTATGGTATGAAAAATCATCTGCCACTCCAGTGCAAGTAGAAAAATGTTGT  
ATGTCCTGATGGCCAATCAGAATGTCCAGATGGTAATACATGTTGCACACTTGTCTTCTGGCCAATATGGT  
TGTGTCCTCTACCAAATGCAGTTTGTGTAGTGATCATCTTACTGCTGTCCATCAGGATACACTTGTG  
GTGTATCATCTGGTACATGCACACAGGGAGAGTCTGTGGTCTTATGGTTTAAAAATCAGCTGCCACTCC  
TGTGCAAGTAGAGAGTGTATCTGTCCAGGAGGCCAATCCGAATGTCCAGATGGTAATACATGTTGCAAA  
CTTGTCTTGGTCAGTATGGTTGTTGCCCTCTACCAAATGCAGTTTGTGTAGTGATCATCTTACTGCT  
GTCCATCAGGATACACTTGTGGTGTATCATCTGGCACATGCACTCAAGGAGAGTCTGTTGTCCCTTGGTA  
TGAAAAGTCATCTGCCACTCCTGTGCACGTAGAAAAATGTTGTTTGTCTGATGGCCAATCAGAATGTCCA  
GATGGTAATACATGTTGCAAACCTTGCTTCTGGCCAATATGGTTGTTGTCCTCTACCAAATGCAGTTTGT  
GTAGTGATCATCTTACTGCTGTCCATCAGGATACACTTGTGGTGTATCATCTGGCACATGCACTCAAGG  
AGAGTCTGTTGTCTTGGTATGAAAAGTCAGTGTCCACTCCTGTGCAAGTAGAGAGTGTATCTGTCCA  
GGAGGCCAAGCACAATGCCAGATGGTAATACATGTTGCAAACCTTGCTTCTGGCCAATATGGTTGTTGTC  
CTCTGCCAAATGCAGTGTGTTGTAGTGATCATCTTACTGCTGTCCATCAGGATACACTTGTGGTGTCTT  
TGCAGGAACCTGCACACGAGGAGAGTCTGTTGTCTTATGGTATGAAAAATCATCTGCCACTCCAGTGCAA  
GTAGAAAAATGTTGTATGTCCTGATGGCCAATCAGAATGTCCAGATGGTAATACATGTTGCAAGCTTGCTT  
CTGGCCAATATGGTTGTTGTCCTCTACCAAATGCAGTTTGTGTAGTGATCATCTTACTGCTGTCCATC  
AGGATACACTTGTGGTGTATCATCTGGTACATGCACACAGGGAGAGTCTGTGGTCTTATGGTATGAAAAG  
TCAGTGTCCACTCCTGTGCAAGTAGAGAGTGTCTCTGTCCAGGAGGCCAATCCGAATGTCCAGATGGTA  
ATACATGTTGCAAACCTTGCTTCTGGCCAGTATGGTTGTTGCCCTCTACCAAATGCAGTTTGTGTAGTGA  
TCATCTACTGCTGTCCATCAGGATACACTTGTGGTGTATCATCTGGCACATGCACTCAAGGAGAGTCT  
GTTGTCCCTTGGTATGAAAAGTCATCTGCCACTCCTGTGCACGTGAAAAATGTTGTATGTCCTGATGGCC  
AATCAGAATGTCCAGATGGTAATACATGTTGCAAACCTTGCTTCTGGCCAATATGGTTGTTGTCCTCTACC  
AAATGCAGTGTGTTGTAGTGATCATCTTACTGCTGTCCATCAGGATACACTTGTGGTGTATCATCTGGC  
ACATGCACTCAAGGAGAGTCTGTTGTCCCTTGGTATGAAAAGTCATCTGCCACTCCTGTGCAAGTAGACA  
GTGTTATCTGTCCAGGAGGCCAAGCACAATGCCAGATGGTAATACATGTTGCAAACCTTCTTCTGGTCA  
ATATGGTTGTTGTCCTTTACCAAATGCAGTGTGTTGTAGTGATGGTGAGCACTGCTGTCCGTCAGGATAC  
ACTTGCAGTGTCTTCTGCGGAACCTGCACACAGGGAGAGTCTGTGGTCTTATGGTATGAAAAGTCATCTG  
CCACTCCAGTGCAAGTAGAGAGTGTGTATGTCAGGAGGCCAAGCACAATGCCAGATGGTAATACATG  
TTGCAAACCTTCTTCTGGTCAATATGGTTGTTGTCCTTTACCAAATGCAGTGTGTTGTAGTGATGGTGAG  
CACTGCTGTCCGTCAGGATACACTTGCAGTGTCTTCTGCAGGAACCTGCACACAAGGAGAGTCTGTTGTT  
CTTGGTATGAAAAGTCATCTGCCACTCCTGTGCAGATAGAGAGTGTGTATGCCCTGATGGCCAATCAGA  
ATGCCAGATGGTAGTACATGTTGCAAACCTTGCTTCTGGCCAATATGGTTGTTGTCCTATACCAAGTGCA  
GTGTGTTGTAGTGATCATCTTACTGCTGTCCATCAGGATACACTTGCAGTGTCTTCTGCAGGAACCTGCA  
CACAAGGAGAGTCTGTTGTTCTTGGTATGAAAAGTCATCTGCCACTCCTGTGCAGATAGAGAGTGTGT  
ATGCCCTGATGGCCAATCAGAATGCCAGATGGTAGTACATGTTGCAAACCTTGCTTCTGGTCAATATGGT  
TGTGTCCTTTACCAAATGCAGTGTGTTGTAGTGATGGTCAGCACTGCTGTCCATCAGGATACACTTGC  
ATGTTTCTGCAGGAACCTGCACACAAGGAGAGTCTGTTGTCCCTTGGTATGAAAAGTCATCTGCCACTCC  
AGTGTACGTAGAGAGTGTGTATGTCCTGATGGCCAATCAGAATGCCAGATGGTAATACATGTTGCAAG  
CTTGTCTTGGCCAATATGGTTGTTGTCCTCTACCAAATGCAGTTTGTGTAGTGATCATCTTACTGTT  
GTCCATCAGGATACACTTGTGGTGTATCATCTGGCACATGTACAAGGGGTAGCAGCATCTTGGAAATGGAG  
TTCAAAGTCAAGTGCACGTTCTAATGTAGACAACTTACAGATTACGGCCACTGAACCAGTTAGCATCTGC  
CCAGATAGCAAGACATCATGCCCTTATCAAGCACTTGTGCCCCCTCATGGCTTACAGGAGAAATGGGGTT  
GCTGCCCCGTACATAATGCTGTGTGCTGTGATGACCACATTCAGTGTGCCCATCAGGCTACAGTTGCGG  
AACCAACTCCTGCCAGAAGGGCTCCATGCACCTACCCCTTCTCTCAAGTCCACTGGCTCCTTAAGCTT  
ACCTTCGAGGGCCAGGAAGAACCAAAGCCAGAGGTCAAAGTTCATGATAATAAGCATCTCTATTTTCAGC



ACAGATTTAACTAGTAATGCATCTGCTGTAATTTGTCCTGATGGCCAATCAGAATGTCCCAGATGGTAATA  
CATGTTGCAAACCTTGCTTCTGGCCAATATGGTTGTTGCCCTCTACCAAATGCAGTTTGTGTAGTGATCA  
TCTTCACTGCTGTCCATCAGGATACACTTGTGGTGTATCATCTGGCACATGCACTCAAGGAGAGTCTGTT  
GTCCCTTGGTATGAAAAGTCATCTGCCACTCCTGTGCACGTAGAAAATGTTGTATGTCTGATGGCCAAT  
CAGAATGTCCAGATGGTAATACATGTTGCACACTTGTCTTCTGGCCAATATGGTTGTTGTCTCTGCCAAA  
TGCAGTGTGTTGTAGTGATCATCTTCACTGCTGTCCATCAGGTTACACTTGTGGTGTTCATCTGGCACA  
TGCACACAGGGAGAGTCTGTTGTCCCTTGGTATGAAAAGTCATCTGCCACTCCTGTGCACGTAGAAAAGT  
TTGTATGCCAGATGGCCAATCAGAATGTCCAGATGGTAATACATGTTGCACACTTGTCTTCTGGCCAATA  
TGGTTGTTGTCTCTGCCAAAATGCAGTGTGTTGTAGTGATCATCTTCACTGCTGTCCATCAGGTTACACT  
TGTGGTGTATCATCTGGCACATGCACACGAGGAGAGTCTGTTGTCTTATGGTATGAAAAGTCATCTGCCA  
CTCCTGTGCACGTAGAAAAGTGTGATGTCTGATGGCCAATCAGAATGTCCAGATGGTAATACATGTTG  
CAAACCTGCTTCTGGCCAATATGGTTGTTGTCTCTACCAAATGCAGTGTGTTGTAGTGATCATCTTAC  
TGCTGTCCATCAGGATACACTTGTGGTGTATCATCTGGCACATGCACTCAAGGAGAGTCTGTTGTCCCT  
GGTATGAAAAGTCATCTGCCACTCCTGTGCACGTAGAAAAGTGTGATGTCTGATGGCCAATCAGAATG  
TCCAGATGGTAATACATGTTGCACACTTGTCTTCTGGCCAATATGGTTGTTGTCTCTACCAAATGCAGT  
GTTGTAGTGATCATCTTCACTGCTGTCCATCAGGATACACTTGTGGTGTATCATCTGGCACATGCACTC  
AAGGAGAGTCTGTTGTCCCTTGGTATGAAAAGTCATCTGCCACTCCTGTGCACGAAAGAAAATGTTGTATG  
TCCTGATGGCCAATCAGAATGTCCAGATGGTAATACATGTTGCAAACCTGCTTCTGGCCAATATGGTTGT  
TGTCTCTACCAAATGCAGTTTGTGTAGTGATCATCTTCACTGCTGTCCATCAGGATACACTTGTGGT  
TATCATCTGGCACATGCACTCAAGGAGAGTCTGTTGTCCCTTGGTATGAAAAGTCATCTGCCACTCCTGT  
GCACGAAAGAAAATGTTGTATGTCTGATGGCCAATCAGAATGTCCAGATGGTAATACATGTTGCAAACCT  
GCTTCTGGCCAATATGGTTGTTGTCTCTACCAAATGCAGTGTGTTGTAGTGATCATCTTCACTGCTGTC  
CATCAGGTTACACTTGTGGTGTTCATCTGGCACATGCACACAGGGAGAGTCTGTTGTCCCTTGGTATGA  
AAAAGTCATCTGCCACTCCTGTGCTTGTAGAAAATGTTGTATGTCTGATGGCCAATCAGAATGTCCAGAT  
GGTAATACATGTTGCACACTTGTCTTCTGGCCAATATGGTTGTTGTCTCTGCCAAAATGCAGTGTGTTGT  
GTGATCATCTTCACTGCTGTCCATCAGGATACACTTGTGGTGTATCATCTGGCACATGCACACGAGGAGA  
GTCTGTTGTCTTATGGTATGAAAAATCATCTGCCACTCCAGTGCAAGTAGAAAATGTTGTATGTCTGAT  
GGCCAATCAGAATGTCCAGATGGTAATACATGTTGCAAACCTGCTTCTGGCCAATATGGTTGTTGTCTC  
TACCAAATGCAGTGTGTTGTAGTGATCATCTTCACTGCTGTCCATCAGGATACACTTGTGGTGTATCAT  
TGGCACATGCACTCAAGGAGAGTCTGTTGTCCCTTGGTATGAAAAGTCATCTGCCACTCCTGTGCACGTA  
GAAAATGTTGTATGCCCTGATGGCCAATCAGAATGTCCAGATGGTAATACATGTTGCACACTTGTCTCTG  
GCCAATATGGTTGTTGTCTCTACCAAATGCAGTTTGTGTAGTGATCATCTTCACTGCTGTCCATCAGG  
ATACACTTGTGGTGTATCATCTGGCACATGCACTCAAGGAGAGTCTGTTGTCCCTTGGTATGAAAAGTCA  
TCTGCCACTCCTGTGCACGTAGAAAATGTTGTATGTCTGATGGCCAATCAGAATGTCCAGATGGTAATA  
CATGTTGCAAACCTTGCTTCTGGCCAATATGGTTGTTGTCTCTACCAAATGCAGTTTGTGTAGTGATCA  
TCTTCACTGCTGTCCATCAGGATACACTTGTGGTGTATCATCTGGCACATGCACTCAAGGAGAGTCTGTT  
GTCTCTTGGTATGAAAAGTCAGTGTGCCACTCCTGTGCAAGTAAAGAGTGTATCTGTCCAGGAGGCCAAG  
CACAATGCCAGATGGTAATACATGTTGCAAACCTGCTTCTGGCCAATATGGTTGTTGTCTCTGCCAAA  
TGCAGTGTGTTGTAGTGATCATCTTCACTGCTGTCCATCAGGATACACTTGCAGGTTTCTGCAGGAACC  
TGCACACGAGGAGAGTCTGTTGTCTTATGGTATGAAAAATCATCTGCCACTCCAGTGCAAGTAGAAAATG  
TTGTATGTCTGATGGCCAATCAGAATGTCCAGATGGTAATACATGTTGCACACTTGTCTTCTGGCCAATA  
TGGTTGTTGTCTCTACCAAATGCAGTTTGTGTAGTGATCATCTTCACTGCTGTCCATCAGGATACACT  
TGTGGTGTATCATCTGGTACATGCACACAGGGAGAGTCTGTGGTCTTATGGTTTAAAAATCAGTGTCCA  
CTCCTGTGCAAGTAGAGAGTGTATCTGTCCAGGAGGCCAATCCGAATGTCCAGATGGTAATACATGTTG  
CAAACCTGCTTCTGGTCAATATGGTTGTTGCCCTCTACCAAATGCAGTTTGTGTAGTGATCATCTTAC  
TGCTGTCCATCAGGATACACTTGTGGTGTATCATCTGGCACATGCACTCAAGGAGAGTCTGTTGTCCCT  
GGTATGAAAAGTCATCTGCCACTCCTGTGCACGTAGAAAATGTTGTTTGTCTGATGGCCAATCAGAATG  
TCCAGATGGTAATACATGTTGCAAACCTGCTTCTGGCCAATATGGTTGTTGTCTCTACCAAATGCAGTT  
TGTGTAGTGATCATCTTCACTGCTGTCCATCAGGATACACTTGTGGTGTATCATCTGGCACATGCACTC  
AAGGAGAGTCTGTTGTCTTGGTATGAAAAGTCAGTGTGCCACTCCTGTGCAAGTAGAGAGTGTATCTG  
TCCAGGAGGCCAAGCACAATGCCAGATGGTAATACATGTTGCAAACCTGCTTCTGGCCAATATGGTTGT  
TGTCTCTGCCAAAATGCAGTGTGTTGTAGTGATCATCTTCACTGCTGTCCATCAGGATACACTTGTGGT  
TTTCTGCAGGAACCTGCACACGAGGAGAGTCTGTTGTCTTATGGTATGAAAAATCATCTGCCACTCCAGT  
GCAAGTAGAAAATGTTGTATGTCTGATGGCCAATCAGAATGTCCAGATGGTAATACATGTTGCAAGCTT  
GCTTCTGGCCAATATGGTTGTTGTCTCTACCAAATGCAGTTTGTGTAGTGATCATCTTCACTGCTGTC  
CATCAGGATACACTTGTGGTGTATCATCTGGTACATGCACACAGGGAGAGTCTGTGGTCTTATGGTATGA  
AAAAGTCAGTGTGCCACTCCTGTGCAAGTAGAGAGTGTCTCTGTCCAGGAGGCCAATCCGAATGTCCAGAT  
GGTAATACATGTTGCAAACCTGCTTCTGGCCAGTATGGTTGTTGCCCTCTACCAAATGCAGTTTGTGT  
GTGATCATCTACACTGCTGTCCATCAGGATACACTTGTGGTGTATCATCTGGCACATGCACTCAAGGAGA  
GTCTGTTGTCCCTTGGTATGAAAAGTCATCTGCCACTCCTGTGCACGTGAAAAATGTTGTATGTCTGAT

GGCCAATCAGAAATGTCCAGATGGTAATACATGTTGCAAACCTTGCTTCTGGCCAATATGGTTGTTGCCTC  
TACCAAAATGCAGTGTGTTGTAGTGATCATCTTCACTGCTGTCCATCAGGATACACTTGTGGTGTATCATC  
TGGCACATGCACTCAAGGAGAGTCTGTTGTCCCTTGGTATGAAAAGTCATCTGCCACTCCTGTGCAAGTA  
GACAGTGTATCTGTCCAGGAGGCCAAGCACAATGCCAGATGGTAATACATGTTGCAAACCTTCTTCTG  
GTCAATATGGTTGTTGTCTTTACCAAAATGCAGTGTGTTGTAGTGATGGTGAGCACTGCTGTCCGTCAGG  
ATACACTTGCATGTTTCTGCGGAACCTGCACACAGGAGAGTCTGTGGTCTTATGGTATGAAAAGTCA  
TCTGCCACTCCAGTGCAAGTAGAGAGTGTGATGTCCAGGAGGCCAAGCACAATGCCAGATGGTAATA  
CATGTTGCAAACCTTCTTCTGGTCAATATGGTTGTTGTCTTTACCAAAATGCAGTGTGTTGTAGTGATGG  
TGAGCACTGCTGTCCGTCAGGATACACTTGCATGTTTCTGCAGGAACCTGCACACAAGGAGAGTCTGTT  
GTTCTTGGTATGAAAAGTCATCTGCCACTCCTGTGCAGATAGAGAGTGTGATGCCCTGATGGCCAAT  
CAGAAATGCCAGATGGTAGTACATGTTGCAAACCTTGCTTCTGGCCAATATGGTTGTTGTCTATACCAAG  
TGCAGTGTGTTGTAGTGATCATCTTCACTGCTGTCCATCAGGATACACTTGCATGTTTCTGCAGGAACC  
TGCACACAAGGAGAGTCTGTTGTTCTTGGTATGAAAAGTCATCTGCCACTCCTGTGCAGATAGAGAGTG  
TTGTATGCCCTGATGGCCAATCAGAAATGCCAGATGGTAGTACATGTTGCAAACCTTGCTTCTGGTCAATA  
TGGTTGTTGTCTTTACCAAAATGCAGTGTGTTGTAGTGATGGTCAGCACTGCTGTCCATCAGGATACACT  
TGCGATGTTTCTGCAGGAACCTGCACACAAGGAGAGTCTGTTGTCCCTTGGTATGAAAAGTCATCTGCCA  
CTCCAGTGTACGTAGAGAGTGTGATGTCTGATGGCCAATCAGAAATGCCAGATGGTAATACATGTTG  
CAAGCTTGCTTCTGGCCAATATGGTTGTTGTCTTACCAAAATGCAGTTTGTGTTGTAGTGATCATCTTAC  
TGTTGTCCATCAGGATACACTTGTGGTGTATCATCTGGCACATGTACAAGGGGTAGCAGCATCTTGGAAAT  
GGAGTTCAAAGTCAAGTGCACGTTCTAATGTAGACAAACTTCAG

**Coding exon 3 Exon type: n**

ATTACGGCCACTGAACCAGTTAGCATCTGCCAGATAGCAAGACATCATGCCCTTCATCAAGCACTTGT  
GCCCCCTCATGGCTTCAGGAGAATGGGTTGCTGCCCCGTACATAAT

**Coding exon 4 Exon type: cn**

GCTGTGTGCTGTGATGACCACATTCCTGTTGCCCATCAGGCTACAGTTGCGGAACCAACTCCTGCCAGA  
AGGGCTCCATGCACCTACCCCTTCTCTCCAAGTCCACTGGCCTCCTTAAGCTTACCTTCGAGGGCCAGGA  
AGAACCAAAAGCCAGAGGTCAAAGTTCATGATAATAAGCATCTCCTATTTTCAGCCAGATGAACCACGGACA  
GGATCCGTCATCTGCCAGGAGGCCAAAATAGAATGTCAAGATGGAAAACGCTTGTGCTGTTAGCCGGCG  
GTGATTATTCTTGTGTCCTCTCCCTCAG

**Coding exon 5 Exon type: n**

GCGGTGTCCCCCATGAGGAATCAGGTGATAAGATGATGTGTCCTGATGAGATCTCATCCTGTCCCACTG  
GATCCACCTGCTGTGACACACCAGGAAACATCTACGGCTGTGCCCTACCAAGCA

**Coding exon 6 Exon type: c**

**Note:** Up to the stop codon. At least 660 bases of 3'ut continues this exon.

GCTATCTGCTGCTCTGATCTGATACACTGCTGTCCAAGTGACTACTCCTGTAACAGCTCTACAGGAACAT  
GCACCAAAGATGACCATATCATGCCATGGGTGGGAAAGATTCCACCTCTCTAA

**Genomic sequence note:** A genomic sequence is not presented (see note 2 in header).

---

00026 **S. salar progranulin 1** Short name: **S\_sal1 or salmo1** Date entered: 2014-03

**Species:** *Salmo salar* (Atlantic salmon)

**Taxonomy (via NCBI):** Eukaryota; Metazoa; Chordata; Craniata; Vertebrata; Euteleostomi; Actinopterygii; Neopterygii; Teleostei; Euteleostei; Protacanthopterygii; Salmoniformes; Salmonidae; Salmoninae; Salmo.

**General Comment:** Very closely related to salmoC. With the exon form sn-n-c, it lacks exons corresponding to the 2nd and 3rd of salmoC, which has the form sn-cn-c-n-c.

**Protein Sequence**

MWNIAALVVLVAGSASCYITCPDGKVCSDQSTCCLTKEGYACCPVTHQVPWTALVQASDSTPQAGVIRCD  
TKFYCPSGTSCCKGPTGKWGCCPFPLGKCCADGQHCEYGYTCDSSFKCRKGYSQIPSGLRDDAKQD\*

**Transcript:**

**Note:** The transcript is very well defined by over 80 EST entries. One is given here as representative of the cDNA sequences. It covers the whole coding sequence of this small transcript.

The cDNA data define the transcript well (below), so no predicted sequence is required.

**cDNA data:****From:** NCBI est: DW583582.1 GI:85055404 with additional 5' and 3' ut**Note:** This represents the cDNA sequence defined very well by over 80 EST sequences. What is presented here is a contig of these sequences extending the untranslated sequences of the representative DW583582.1

```

CCCATTGTGCTGTGTGTAACCCCATGACAGGAAAGTTTTAAATCCCTGAGCTGTGACTAACTACAGGATGT
GGAACATAGCTGCATTGGTGTAGTGGTGGCAGGGTCTGCCTCTTGCTACATCACCTGCCCTGATGGGAA
GGTCTGCTCTGATCAATCAACCTGCTGTTGACTAAAAGAAGGATACGCTGCTGTCCAGTTACCCATCAG
GTTCCGTGGACAGCACTAGTTCAGGCCTCTGACAGCACCCACAGGCTGGAGTCATTTCGCTGTGACACAA
AATTCTACTGCCCTTCTGGAACCAGCTGCTGCAAGGGACCGACTGGCAAATGGGGCTGCTGCCCATTTCC
ACTGGGCAAGTGTCTGTCAGATGGCCAGCATTGCTGTGAATATGGATACACCTGTGACTCCTCATTCAAG
TGCAGGAAAAGTTACTCTCAGATTCCTTCAGGTCTGAGGGATGATGCTAAGCAGGACTGACAAGATGTCT
TATTAATTATAATGTTGTCACCTGACTGTTGATTGAAAGAACAGATTTGCTAGTTTAGCTAACCAA
AACATCAGTCCCTAGCTTGTATTATGAAAATCGAATGCAACAATGTTTTCAATTCTAATTTTGTCTTCAA
AAGCAACTCAAACATAAAAATGTAATAAATAAATAAATAAATAAATAAATAAATAAATAAATAAATAAATA
GTTTATAGGAAAATAATGCACGCTCTAGAATGCCCTTCATGACAATCAGAAACGAGTGTTCACAATGTC
ACGGTATAACATTACATGTTGAAAAGATGTTGAATCATGTCACCCACTCATTTCATTGCATAAAAAGACATA
TCAATACACTTGAATAAAATGACATTCTAAGAAAAAACTGTT

```

**Genomic data:****Note:** Genomic data (exons).

From NCBI: AGKD01000506 REGION: 31000..33600

**Note:** gblAGKD01000506.1:31000-33600 *Salmo salar* Contig\_000506, whole genome shotgun sequence**Coding exon 1 Exon type: sn****Note:** from the start codon (which is the beginning of this exon)

```

ATGTGGAACATAGCTGCATTGGTGTAGTGGTGGCAGGGTCTGCCTCTTGCTACATCACCTGCCCTGATG
GGAAGTCTGCTCTGATCAATCAACCTGCTGTTGACTAAAGAAGGATACGCTGCTGTCCAGTTACCCA
T

```

**Coding exon 2 Exon type: n**

```

GTTCCGTGGACAGCACTAGTTCAGGCCTCTGACAGCACCCACAGGCTGGAGTCATTTCGCTGTGACACAA
AATTCTACTGCCCTTCTGGAACCAGCTGCTGCAAGGGACCGACTGGCAAATGGGGCTGCTGCCCATTTCC
ACTG

```

**Coding exon 3 Exon type: c****Note:** up to the stop codon.

```

GGCAAGTGTCTGTCAGATGGCCAGCATTGCTGTGAATATGGATACACCTGTGACTCCTCATTCAAGTGCA
GGAAAAGTTACTCTCAGATTCCTTCAGGTCTGAGGGATGATGCTAAGCAGGACTGA

```

**Genomic sequence note:** A genomic sequence is not presented (see note 2 in header).00023 **S. salar progranulin A** Short name: **S\_sala or salmoA** Date entered: 2014-03**Species:** *Salmo salar* (*Atlantic salmon*)**Taxonomy (via NCBI):** Eukaryota; Metazoa; Chordata; Craniata; Vertebrata; Euteleostomi; Actinopterygii; Neopterygii; Teleostei; Euteleostei; Protacanthopterygii; Salmoniformes; Salmonidae; Salmoninae; Salmo.**General Comment:** Transcript well defined by cDNA and EST data. Genomic sequence data is complete for the gene, but not yet properly assembled.**Protein Sequence**

```

MQRYLVLVLCMALLAQVVSADDCPGGEEACEEGNTCKVPSDGYECCPMYQAECCEDHIHCCPEGTLVNVNESM
CVNGTVSLPWERVSAKQSIYPKSFIRMISANAGDEDDNICPDKSHCPPEEFSLKATTGYGCCPVAHAVPC
SDGKHCCPEGHQCNIDCSCSIKQTEPVVAVMCSRESECPGTTCCETPDGWSGCCPMPKAVCCEDKIHCC
CPEGSTCDIKQSKCISTTNKEMPMWAKFPARKRAEWETQNEVAQVITPDPDITTSANRSPASLWEGTSP
FIRTDVPCDESTACLDGTTCCCKTQEGGWACCPPLQAVCCSDFVHCCPHGKKNLAAQTCDPSPGSPSEP
WLKKVPAVPREGKLPDVTCDPHTMCPDNTTCCKTASGDWACCPPLPEAVCCEDHEYCCPHGTTCDLGLT
CDGPSGSEPMVGKVALTTLAPDHEEAATDQQGVQVDDMELPTKDDKDVPCDESTACLDGTTCCCKTQEGG
WACCPPLQAVCCSDFVHCCPHGKKNLAAQTCDPSPGSPSEPWLKKVPAVPREGKLPDVTCDPHTMCPD
NTTCCKTASGDWDCPPLPEAVCCEDHEHCCPHGTTCDLTLTCDGPSGPEPMVGKVPALTTLAPDHEEAP
ADHQGVQMDMELPTEDDESDEDEELHRTQCDAAHTSCPDKATCCFMKSTQKWGCCPLQAVCCADGEHCC

```

PKDYICDMSKTSKSGGVVIPWYNKLAEPHDIALTTPLSVKCDTQNRCPGSSCCQLSTGQWGCCPLRK  
AVCCADEEHCCPQGYSCNMGSCTCQKLMFLQFQTVPLTRVSAPEPPTPQEKEIHCGGPFVNCNEETCCKA  
SATTWACCPVNAVCCSDMKHCCTTGTYTCGEGGSCTQSTGFKWDHWQVFFSNKKRALHV\*

### Transcript:

**Note:** An EST contig of over 40 sequences defines the transcript well. Since the full coding sequence is also in a cDNA entry, for simplicity it is that which is included in this list.

The cDNA data define the transcript well (below), so no predicted sequence is required.

### cDNA data:

**From:** NCBI: BT059209.1 GI:223648327

**Note:** cDNA sequence data:

ATTGTCAAGGAGCGCGACACCTGTAAAGTCACTGAGATAGAGATGCAGAGGTATCTGGTGCTCTGTATG  
GCCCTGCTGGCCAGGTCTCTGCTGATGACTGCCAGGAGGAGGGCGTGTGAGGAGGGCAACACCTGCT  
GCAAGGTCCCCCGATGGCTAATGAATGTTGCCAATGTATCAGGCTGAGTGTGTGAGGATCATATCCA  
CTGCTGCCCTGAGGGAACTCTGCGTTGTGAATGAGTCCATGTGTGTGAATGGAACGTCTCCCTACCA  
TGGGTGGAGAGAGTCTCTGCTAAACAGTCCATATACTCTAAATCTTTAGAAATGATCAGTGCAAATGCCG  
GGGATGAGGATGATAACATCTGCCCTGACAAGTCCCACTGCCCGAAGAGTTCTCTGTCTGAAGGCCAC  
TACAGGCTATGGTTGCTGCTCTGTTGCTCATGCTGTGCTTGTCTGATGGGAAACATTGCTGTCTGAA  
GGCCACCAGTGCACACAGACTGCAGTCTCTGCATCAACAGACAGAGCCTGTTGTTGCAGTGATGTGCA  
GTGACAGAGAGTCTGAGTGTCCAGAGGGAACCAATGCTGTGAGACTCCAGATGGGAGTTGGGGGTGCTG  
CCCCATGCCAAGGCTGTGTGCTGTGAGGATAAGATTCACTGTTGCTCTGAGGGCAGCACCTGTGACATC  
AAGCAATCCAAGTGTATATCCACTACCAACAAGGAAATGCCCATGTGGGCTAAGTTCCCTGCCCGCAAGA  
GGGAGAGTGGGAAACCCAGAAATGAAGTTGCCAAGTGCACACCTATTCCAGACACTACCACCTCAGC  
CAATAGGAGTCTGCTTCTCTTTGGGAGGTACTTCTCCACCTTCAATTAGGACAGGAGACGTTCCCTGT  
GATGAGTCAACGGCTGTTTGGATGGAACCAATGTTGTAAAACACAGGAAGGAGGATGGGCAATGCTGTC  
CTCTGCCACAGGCACTTTGCTGCAGTGACTTTGTCCACTGCTGCCACATGGTAAGAAGTGCAACCTGGC  
TGCCAGACGTGTGACGACCCCTCAGGCTCCCCCTCTGAGCCCTGGCTGAAGAAGTTCTGCGGTGCCCT  
CGGGAGGTAAATTGCCAGGAGATGTTACCTGTGACCCACCCACATGTGTCCGACAAACACCACCTGCT  
GCAAGACAGCGTCAGGAGACTGGGCTGCTGCCCTTGCTGAGGCTGTTTGTGTGAGGACCACGAGTA  
CTGCTGCCCCCATGGCACCACTGTGACCTGGCTGGCTCACCTGTGATGGTCCCTCAGGGTCCGAGCCT  
ATGGTGGGGAAGGTGCAAGCTCTCAACAACCTGGCACCTGATCATGAAGAGGCAGCCACAGACCAGCAAG  
GGGTGACAGGTGGATGACATGGAGCTGCTTACAAAGGATGACAAAGACGTTCCCTGTGATGAGTCAACGGC  
CTGTTTGGATGGAACCAATGTTGTAAAACACAGGAAGGAGGATGGGCAATGCTGTCTCTGCCACAGGCA  
GTTTGTGCAAGTACTTTGTCCACTGCTGCCACATGGTAAGAAGTGCAACCTGGCTGCCAGACGTGTG  
ACGACCCCTCAGGCTCCCCCTCTGAGCCCTGGCTGAAGAAGTTCTGCGGTGCCCTCGGGAGGTAAATT  
GCCAGGAGATGTTACCTGTGACCCACCCACATGTGTCCGACAAACACCACCTGCTGCAAGACAGCGTCA  
GGAGACTGGGACTGCTGCCCTTGCTGAGGCTGTTTGTGTGAGGACCACGAGCACTGTTGCCCCCATG  
GCACCACCTGTGACCTGGCTACCCCTCACCTGTGATGGCCCTCAGGGCCAGAGCCGATGGTGGGGAAGGT  
GCCCGCCCTCAACAACCTGGCACCTGATCATGAGGAGGCACCTGCAGACCACCAGGGGGTGCAGATGGAC  
GACATGGAGCTGCTTACAGAGGATGATGAAAGTGCAGAGACGAGGAGTTGCACAGGACACAGTGTGACG  
CCCACACCAGTGCACAAAGGACGCCACCTGCTGCTTTATGAAATCCACCCAGAAATGGGGTGTGTCGCC  
ACTGCCACAGGCACTGTGCTGTGCTGATGGAGAGCACTGCTGTCCAAAGACTACATAATGTGATAAGAC  
AAGACTTCTGCTCTAAGGGTGGGGTGGTGTATCCCATGGTACAACAAGCTGGCAGCTGAGCCACATGACA  
TTGCCCTTACTACCCCTCTCTGTGAAGTGTGACACCCAGAACAGATGCCCTGAAGGCTCCAGCTGCTG  
CCAACCTTCCACAGGACAGTGGGGTGTGCTGCCCTGCGCAAGGCTGTGTGCTGTGAGATGAGGAGCAC  
TGCTGTCCACAGGGTACAGCTGTAAACATGGGCTCAGGGACTTGGCAGAAGCTAATGTTTCTTCAAGTCC  
AGACGGTACCCCTAACCCGGGTATCTGCGCTGAGCCCCGACCCACAGGAGAAGGAAATCCACTGTGG  
GGGGCGTTTGCTGCAATAATGAGGAGACATGCTGCAAGGCTCCGCCACTACATGGGCTTGTGTGCC  
GTTCCAAATGCGGTGTGCTGCAAGTACTGCTGCACTACAGGCTACACCTGTGGTGGAGGAG  
GGTCTGCACCCAGTCCACTGGCTTCAAATGGGACCACTGGCAGGTGTTCTTCTCAACAAGAAGAGAGC  
CCTGCATGTGTGACAAACATTGGGGCAACCGTTGGAGTGATAGGCCAAACTCCACCACCAGACGCATTGC  
ACTAATGAAGGACGCGAGGAACCTAATACTACTGTTACAGTATAATCAAATGTGTTTTTTACAGAGGAAA  
AATAATGTGTGCAATTTAGGAAAGGGAGTGAATAATGTAACATTTTGCACCATTGGTAGGTGCTTTGG  
AATGTTACTACATTTACTTCAAGAGATACCCATGCTTGTCTCATGAACAGAACTATCAAGATTGTACAG  
AGGAGCATATAAATGACAAGAACTTAGTACTGTTTTACAATGTTTGTGTTTACCTTTTTAAACAGGAAGTG  
TGTGTTTTTTAGTTGATCGTGTGAAGTGCATTGTGCTCATAGTTTTCAGGTATACCTTTGAAATGCTTT  
TTACATGACATTTACATGACATTTTTACCTTCAATTAACAGGAAAGTCAAGTAAAGAACAAATTTTTGTT  
CAGGGGCAGAACGACAGATTTTACCTTGTCAACTCGGGGATTGATTTTGCACCTTTTCGGTCACTAGT

CCAACACTCTAACCCTAGGCTACCTGCCGCCCCATATGCCCTCTGTCTTGTGCTACCACGTTTTAAGT  
AAGACATGGATTATCCCCTTCTTGTGTTTTACAAAATTATGCAATTTTAAATAGTCCGTAATGATTCTT  
GCTGTTGCTACCAAAGGGAATTAATTAGCTGTAAAATGTGAATAAAAAAGTCATTGCCAAATCAGTTGTA

### Genomic data:

**Note:** Genomic sequences defining exon structure are in (reverse complements) AGKD01037414.1, AGKD01029393.1, AGKD01030149.1, although there are errors, including an assembly error in AGKD01029393.1 after coding exon 13.

From NCBI: AGKD01037414.1 GI:354421622

**Note:** Contains coding exons 1 to 7 in the reverse complement of the first 3500 bases.

#### Coding exon 1 Exon type: sn

**Note:** from start codon (which is at the beginning of this exon)

ATGCAGAAGTATCTGGTGTCTGTATGGCCCTGCTGGGCCAGGTCTCTGCTGATGACTGCCAGGAGGAG  
AGGCATGTGAGGAGGGCAACACCTGCTGCAAGGTCCCCTCTGATGGCTATGAATGTTGCCAAATGTATCA  
G

#### Coding exon 2 Exon type: c

GCTGAGTGTCTGAGGATCATATCCACTGCTGCCCTGAGGGAACTCTGCGTTGTGAATGAGTCCATGT  
GTGTGAATGGAACGTCTCCCTACCATGGGTGGAGAGAGTCTCTGCTAAACAGTCCATATATCCTAAA

#### Coding exon 3 Exon type: n\*

TCTTTCAGAAATGATCAGTGCATATGCCGGGGATGAGGATGATAACATCTGTCTGACAAGTCCCCTGCC  
CCGAAGAGTTCTCTGTCTGAAGGCCACTACAGGCTATGGTTGCTGTCTCTGTTGCTCAT

#### Coding exon 4 Exon type: c\*

GCTGTGCCCTTGTCTGATGGGAAACATTGCTGTCTCTGAAGGCCACCAGTGCAGCACAGACTGCAGCTCCT  
GCATCAAACAGACAG

#### Coding exon 5 Exon type: n

AGCCTGTTGTTGCAGTGATGTGCAGTGACAGAGAGTCTGAGTGTCCAGAGGGAAACCACATGCTGTGAGAC  
TCCAGATGGGAGTTGGGGGTGCTGCCCCATGCCCAAG

#### Coding exon 6 Exon type: c

GCTGTGTGCTGTGAGGATAAGATTCACTGTTGTCTGAGGGCAGCACCTGTGACATCAAGCAATCCAAGT  
GTATATCCACTACCAACAAGGAAATGCCCATGTGGGCTAAGTTCCCTGCCCGCAAGAGGGCAGAGTGGGA  
AACCAGAATG

#### Coding exon 7 Exon type: j

AAGTTGCCCAAGTGACAACACCTATTCCAGACACTACCACCTCAGCCAATAGGAGTCTGCTTCTCTTTG  
GGAGGGTACTTCTCCACCCTTCATTAGGACAGGAG

From NCBI: AGKD01029393.1

**Note:** Contains, with some sequence errors, coding exons 2 to 13 in the reverse complement, and then hits an assembly error with no further granulin gene sequence beyond. Because of errors in exon 2 and several in exon 6, only exons 8 and 9 are given. The remaining exons are reported from AGKD01030149.1 following this.

#### Coding exon 8 Exon type: n

ACGTTCCCTGTGATGAGTCAACGGCCTGTTTGGATGGAACCACATGTTGTAAAACACAGGAAGGAGGATG  
GGCATGCTGTCTCTGCCACAG

#### Coding exon 9 Exon type: cn

GCAGTTTGTGCTGAGTACTTTGTCCACTGCTGCCACATGGTAAGAAGTGCAACCTGGCTGCCAGACGT  
GTGACGACCCCTCAGGCTTCCCCTCTGAGCCCTGGCTGAAGAAGTTCTGCCGTGCCCGGGAGGGTAA  
ATTGCTAGGAGATGTTACCTGTGACCCACCTACATGTGTCCCACAAACACCCTGCTGCAAGACAGCG  
TCAGGAGACTGGGCTGCTGCCCTTTGCCCTGAG

From NCBI: AGKD01030149.1

**Note:** Includes coding exons 10 to 16 in the reverse complement. This overlaps the progranulin gene sequence in AGKD01029393.1 reverse complement by 4 exons and correctly extends the sequence to the final coding exon of this gene.

#### Coding exon 10 Exon type: c

GCTGTTTGTGCTGAGGACCACGAGTACTGCTGCCCCATGGCACCACCTGTGACCTGGCTGGCCTCACCT



GTGATGGTCCCTCAGGGTCGGAGCCTATGGTGGGGAAGGTGCAAGCTCTCACAAACCCTGGCACCTGATCA  
TGAAGAGGCAGCCACAGACCAGCAAGGGGTGCAGGTGGATGACATGGAGCTGCCTACAAAGGATGACAAA  
G

**Coding exon 11 Exon type: n**

ACGTTCCCTGTGATGAGTCAACGGCCTGTTTGGATGGAACCACATGTTGTAAAACACAGGAAGGAGGATG  
GGCATGCTGTCTCTGCCACAG

**Coding exon 12 Exon type: cn**

GCAGTTTGTGTCAGTGAAGTGTGTTGTTCCACTGCTGCCCCACATGGTAAGAAAGTGC AACCTGGCTGCCCAGACGT  
GTGACGACCCCTCAGGCTCCCCCTCTGAGCCCTGGCTGAAGAAAGTTCTTGCCGTGCCTCGGGAGGGTAA  
ATTGCCAGGAGATGTTACCTGTGACCCCAACCATGTTGTTCCCGACAAACACCACCTGCTGCAAGACAGCG  
TCAGGAGACTGGGACTGCTGCCCCCTTGCCCTGAG

**Coding exon 13 Exon type: cn**

GCTGTTTGTGTCGAGGACCACGAGCACTGTTGCCCCATGGCAGCACCTGTGACCTGGCTACCCTCACCT  
GTGATGGTCCCTCAGGGCCAGAGCCGATGGTGGGGAAGGTGCCCGCCCTCACAAACCCTGGCACCTGATCA  
TGAGGAGGCACCTGCAGACCACAGGGGGTGCAGATGGACGACATGGAGCTGCCTACAGAGGATGATGAA  
AGTGACGAAGACGAGGAGTTGCACAGGACACAGTGTGACGCCACACCAGCTGCCAAAAGGACGCCACCT  
GCTGCTTTATGAAATCCACCCAGAAATGGGGCTGCTGCCCACTGCCACAG

**Coding exon 14 Exon type: cn**

GCAGTGTGCTGTGCTGATGGAGAGCACTGCTGTCCCAAAGACTACATATGTGATATGAGCAAGACTTCCCT  
GCTCTAAGGGTGGGGTGGTGTATCCCATGGTACAACAAGCTGGCAGCTGAGCCACATGACATTGCCCTTAC  
TACCCCTCTCTGTGAAGTGTGACACCCAGAACAGATGCCCTGAAGGCTCCAGCTGCTGCCAACTTTCC  
ACAGGACAGTGGGGCTGCTGCCCCCTGCGCAAG

**Coding exon 15 Exon type: cn**

GCTGTGTGCTGTGCAGATGAGGAGCACTGCTGTCCACAGGGCTACAGCTGTAACATGGGGCTCAGGGACTT  
GCCAGAAGCTAATGTTTCTTTCAGTTCCAGACGGTACCCCTAACCCGGGTATCTGCGCTGAGCCCCCGAC  
CCCACAGGAGAAGGAAAATCCACTGTGGGGGGCCGTTTGTCTGCAATAATGAGGAGACATGCTGCAAGGCC  
TCCGCCACTACATGGGCTTGTGTTCCCGTTCCAAAAT

**Coding exon 16 Exon type: c**

**Note:** up to the stop codon

GCGGTGTGCTGCAGTGAAGCACTGCTGCACTACAGGCTACACCTGTGGTGAGGGAGGGTCCCTGCA  
CCCAGTCCACTGGCTTCAAATGGGACCACTGGCAGGTGTTCTTCTCCAACAAGAAGAGGCCCTGCATGT  
GTGA

**Genomic sequence note:** This *Salmo salar* progranulin A gene sequence including known transcript was generated by combining AGKD01037414.1:1..3500\_rc, AGKD01029393.1:17314..17867\_rc, AGKD01030149.1:9871..15124\_rc in that order, where \_rc denotes reverse complement sequence.

CAGCGCTTCAGGAGTCCGGTACATTTGTC AAGGAGCGCGGACACCTGTAAAGTCACTGAGATAGAGGTAA  
GGTCAACTTTTTTTATTTATATAGTAGCAAGATCTCAATGACAAATATATTCAATTC TAAACTTCTCAA  
TGAAATTGCACCAAATGTTCTACTTCAAATTA AATTGCATATGTTGTTTATGCTATCCTTGTCAATTGCTT  
TTAAATTGTTGTCATTGTTCAATTGTCTTTTGTGATAACAATTTCAAATCATTTAATATGGACCTAGGTGG  
GTGGTCCATCTTTTAAAATCTAAATGCACATTATGACCAACGTGATTGAGTGTGTGCCAATATAAAAA  
GAAGCATGGTGATATATCAGGGTCCACAGTCTTCTGAAACTGTTAAAGTCCATTTCTTCTCCTTTTGA  
AACCACCTTGTGACAAAATACAGTTAGTGAACAGTACTGATTGTCAGGTGAATATTGTCGTGTTAATA  
CACCTGTGTTCCCTATTGTCTTTGATACCACAA TGAAGGAAAGTATCTCTTATGGGAGGTACTTGGCTCA  
GATTAAGGGGAATTTTCTTTCAATAAAAACAGGTAA ACCGAAAGTAGAAGTGTGATGCTGCATCATT  
TTGTGCTAGTAGCCTAAACAACATTGAAGCAATGGTAGACTGCTTTAATGATCTCCCTATGAAGCTCA  
ACACTTAGTAACAGTATAATCACATCCCCATCCCTGCATCATAGATTCAATCCTTAAATGTGGTTGCATA  
TGAGGAGGGCTTTGTATTGGTAAGAATGTGGA ACTATTAAGTGTCTGAAGCTCACCCATGGAACATAAA  
AGAGGAAGTGAATCTATGAAAATAGCTTGGGGAATTTTGATATACTTTAGTAGGCTACAGCAGTACCTCA  
GGAGATTGTCTGAAAGTTACTCTAGTTAAGAGGAAAGTGAGAGTTCTGTCTAGATTTAGTTCTGATGACT  
CCATTGTTGCGATTTTATGCGTTTCTGTACAAAAGAGCTTTTATAACATTTGTCAGTTATTGATTGTACA  
ATGCATGTATATAATATACAGTTTGTGTTAGAAGTATTTCTGTCTCTCTCTCCAGATGCAGAAGTAT  
CTGGTGTCTGTATGGCCCTGCTGGGCCAGGTCTCTGCTGATGACTGCCAGGAGGAGAGGCATGTGAGG  
AGGGCAACACCTGCTGCAAGTCCCTCTGATGGCTATGAATGTTGCCAATGTATCAGGTATGTATGGG  
GTGGTGCCTGCAGAGCTTAGCCCTTAGCTTTATTTACAGCTGAACCCGAGTTCCCTAACCCCTGTACAC

TGAATTATATCTATAAGAATTGTACAAACCAAATAGGTAGACTATGGTGTTCATTGTCTCTTACCCTGAAA  
TAGATACCTCTTTATTGCACCCTTGTGCTAGCATTCTCTCGTATAATCTGTTTGGTCTGTAAGATGTGAG  
ATTCTAACACACTTTGTTAATCAAACACTCTCTTACCATTATCTCAGGCTGAGTGCTGTGAGGATCAT  
ATCCACTGCTGCCCTGAGGGAACACTCTGCGTTGTGAATGAGTCCATGTGTGTGAATGGAACCTGTCTCCC  
TACCATGGGTGGAGAGTCTCTGCTAAACAGTCCATATATCTAAAAGTAAGAATGTCATTGAATCCAGG  
AAGAAAGTGTAGCTGACTATTGACAACGTTGAAATGCACTGTAACAATGACACCAGTTGACTTTCATGGC  
AATATGTGTCCCTGTTTTCAATCATTACATTGTTGAGGAATCAGGCAGAACTCCGTTATCAGCAATAAG  
ATTTTATTCAAGCAATTGCAGGGACGATCACTTTCTGGATGAAACTGGAGAGGAACTTAAAAATGTCCAG  
AATCACACAGTCATTTATATTCTTCATCTACACAAAGAACTGCTTACCCTTCTCTTAAAGCTATATACAA  
ACAAGAATCGGTTCTAACCAGTTCTCACAGCCTAAGATAGGGGAGTGATAAGATCTTTAAAGCCTAAACA  
GACAGAACTAGAATTCAGCCTGGTTACGCCTTTAGTGCCCCAGAGATAAGGGGCCAAAAACAAATCAATC  
CTTTGTGCGGTGTGTGAAGAGGGTACTGAAAATTAACAGTGAAAAATACATACAGTACTATTCAACTCAA  
GCATTTACATAGCATTAGACTGTAACAAACCATTTTGCCCCAACACATAATTAACCTACATGAACGGAA  
GGTAATCAAAAATACTATGATCAGTCATGTTTTTTGTAATTGAAAAAGTAAAAATGATTTTTTTTTCTACCC  
CTCTAGTCTTTTCAAGATGATCAGTGCATATGCCGGGGATGAGGATGATAACATCTGTCTGACAAGTCCC  
ACTGCCCCGAAGAGTTCTCTGTCTGAAGGCCACTACAGGCTATGGTTGCTGTCTGTTGCTCATGTAAT  
AACCTAAACACTGTTGCAATCTAGCCTTTTCCGCCAGATTACACTGTTTATACCGTTACATAAAACATGC  
ATTGGTGTCAATGGAAAAACTGGAGTTATGTGCACAGATATCAAGTTAGGATGCAGGCCCTGAGTGAATAG  
TAAATTGATCTAATGTACACACAGGCTGTGCCTTGCTCTGATGGGAAACATTGCTGTCTGAAGGCCACC  
AGTGCAGCACAGACTGCAGCTCCTGCATCAAACAGACAGGTTAGACTCTTGTGGAGTCACGTGTTGCAAT  
CTTATGCTTCTGTTGCAACATCATCACTAACCCTCTGCCTTCTTCCACCCGGCAGAGCCTGTTGTTGC  
AGTGATGTGCAGTGACAGAGTCTGAGTGTCCAGAGGGAACCACATGCTGTGAGACTCCAGATGGGAGT  
TGGGGGTGTGCCCATGCCAAGGTGGGGGGCTATATGGAGGGGGCTAGGTGGTTACCATCATGGATT  
TGCGAGTCAGGAATAATATTGGTCTTTGAATGTGTGACATGTACACTCTCCAGTGTCTGTAATCACTCC  
ATGGAGAGATGTCTAATCGAGGATTTGCATGGCCTATGTGCTAACCCTTTGTTTATATATGGTCATCTCA  
TGAGGTGATTCTCTGTGTGTCTGTGTGCACTGACCAGGCTGTGTGCTGTGAGGATAAGATTCACTGTTGT  
CCTGAGGGCAGCACCTGTGACATCAAGCAATCCAAGTGTATATCCACTACCAACAAGGAAATGCCCATGT  
GGGCTAAGTTCCTGCCCGAAGAGGGCAGAGTGGGAAACCAGAATGGTAGGTTTCACCCCTGCCCC  
CCCTCCAAAAGGCATATTTTCTGGTCTATTTTTGTCTGGATGTTAATGTGTATATGATTATTTTGTCTGT  
ACGTGCTTCCAGAAGTTGCCAAGTGACAACACCTATTCCAGACACTACCACCTCAGCCAATAGGAGTCC  
TGCTTCTCTTTGGGAGGGTACTTCTCCACCTTCATTAGGACAGGAGGTATGACATTACACTTCTTCTTA  
gaacaatacaaatagtgttggaaatattttgtagctcgtccagttgtgttgatcgtaaacaccctgctg  
tctctccagacgttccctgtgatgagtcacgcgctgtttggatggaaccacatgttgtaaaaacacagga  
aggaggatgggcatgctgtcctctgccacaggtatactatgtctcatactgtaggggccattcactctc  
ttcgtaaatcaatttcttaagatagatcaacctgattgcatgtcttttgcttgtcccgtgacagcttcc  
cctttttgtttgggttcttgtctcttccaggcagtttgtcgcagtgactttgtccactgctgccacatg  
gtaagaagtgaacctggctgccagacgtgtgacgaccctcaggttcccctctgagccctggctgaa  
gaaggttccctgccgtgcctcgggagggtaaatgtcaggagatgttacctgtgaccccacctacatgtgt  
cccgacaacaccacctgctgcaagacagcgtcaggagactgggctgctgccctttgcctgagGTAGGGG  
ACAAAATAAATATGGCTACTACTGCTGTGGATAGGCACATTAATTGAATGGCCTCTTAACTTGACTGCTCT  
GCGATGCGGTGAGAGATTCTGTATGGCTAACAAAGAGGCACCTTAGTTTTGGTCTTTACGACATCCAGTA  
TCACATCCTCATTCTTTACTCCTGTCAGCTTGTGCTGCTTGTGATCTTAACTTTCTTCTGCCTTGTA  
AGGGGTTTTGGAGCTTGAACCACATGTTGTTTTATAGCAAGGGGGCTATGTTTCATTGAAAAGTAGAAC  
TGGGAAACTGGGTAATATAGGAGTCACAACTTTTCTTAACTTGATAATCTCTTCTGCAACCAGCAAT  
ACTTCGACATAATTTCTATAAAAGGCTTGTGACAGTCTTAAATGACAGAAAATGTTTTGAGTGTCTTTCC  
CTTCTCCATCCAGGCTGTTTGTGTGAGGACCACGAGTACTGCTGCCCCATGGCACCACCTGTGACCT  
GGCTGGCCTCACCTGTGATGGTCCCTCAGGGTCGGAGCCTATGGTGGGAAGGTGCAAGCTCTCACACC  
CTGGCACCTGATCATGAAGAGGCAGCCACAGACCAGCAAGGGGTGCAGGTGGATGACATGGAGCTGCCTA  
CAAAGGATGACAAAGGTGATGAAGACGAGGAGGGGCCAGGACACAGTATGACGCCACACCACCTGCTG  
CTTTATTAATAATTTTGTAGCTCATCCAGTTGTGTTGATCGCTAACACCCTGCTGTCTCTCCAGACGTT  
CCCTGTGATGAGTCAACGGCCTGTTTGGATGGAACCACATGTTGTAAAACACAGGAAGGAGGATGGGCAT  
GCTGTCTCTGCCACAGGTATACTATGTCTCATACTGTAGGGGCCATTCACTCTCTTAGCTAATCAATT  
TCTTCAAGAGAGATCAACCTGATTGCATGTCTTTTGTCTTCCCGTGACAGCTTCCCCTTTTTTGTGGG  
TTCTTCTCTTCCAGGACGTTTGTGCACTGACTTTGTCCACTGCTGCCACATGGTAAGAAGTGCAAC  
CTGGCTGCCAGACGTGTGACGACCCCTCAGGCTCCCCCTGAGCCCTGGCTGAAGAAGGTTCTGCCG  
TGCTCGGGAGGGTAAATTGCCAGGAGATGTTACCTGTGACCCACCCACATGTGTCCCACAAACACCAC  
CTGCTGCAAGACAGCGTCAGGAGACTGGGACTGCTGCCCTTGCTGAGGTAGGGACAAAATAGATATGGC  
TACTACTGCTGTGGATAGGCACATTAATTGAATGGCCTTAACTTGACTGCTCTGCGATGCGGTGAGAG  
ATTCTGTATGGCTAACAAAGAGGCACCTTAGTTTTGGTCTTTACGACATCCCATTATCACTTCTCATTCT  
TTACTCTGTGACGCTTGTGCTGCTTGTGATCTTAACTTTCTTCTGCTTGTAAAGGGTTTTTGGAGCT

TGAACCACATGTTGTTTTATAGCAAGGGGGCTATGTTTCATTGAAAAGTAGAACTGGGAACTGGGTAA  
TATAGGGAGTCACAACTTTTCTCTAACTTGCATAATCTCTTCTGCAACCAGCAATACTTCTACATAATTT  
CTATAAAGGCTTGTGACAGTCTTAAATGACAGAAAAATGCTTGTGTGTGTCCTTTCCCTTCTTAAAGGCT  
GTTTGTGTGAGGACCACGAGCACTGTTGCCCCATGGCAGCACCTGTGACCTGGCTACCTCACCTGTG  
ATGGTCCCTCAGGGCCAGAGCCGATGGTGGGGAAAGGTGCCCGCCCTACAACCCTGGCACCTGATCATGA  
GGAGGCACCTGCAGACCACCAGGGGGTGCAGATGGACGACATGGAGCTGCCTACAGAGGATGATGAAAGT  
GACGAAGACGAGGAGTTGCACAGGACACAGTGTGACGCCACACCAGCTGCCCAAAGGACGCCACCTGCT  
GCTTTATGAAATCCACCAGAAAATGGGGTCTGCTGCCACTGCCACAGGTGAGTGTACAGTAATAGTTAT  
TGCTGAGCAATTGGTGTCTTTGAGGTCTGTTTCACTTTTTCGTTTCGATTATAAAATAAATAAACGGATTTT  
GGTTTCGATTATTTGGGTTGAATGCTGTAAACAGCACAGAATATAACAATACAAGTCCCATGGTGGAAAGT  
ACTGCCATTACTGCTTATCACTTATCACATTGCTTTACTTTAATAAAAAATATTACTTTTTTGTGTATATTA  
CATTTGTTTTAATTTAAGAACTTTATTTTCAATTCATCATTTTCTCTATAGAGCTGCTGCCTAT  
GCTGTCTGACAAAATCAAAAACATTTTAGTTCTTCAACATAAAATAAGGCATACTTTTATGACTGCTGAAT  
ACCAACTATCAATTACTTTGATCATGTATTTTCAAGGTAGAGATACCTCGCGAAGCAACAGCTGCTCCAAA  
GACAGTACAGTATGAAGATAGGCAGAACTGCTTCTCAATAGAAAATATCCAATCATGCTTGTAGGCGAT  
GTCATGGCGACATTGGCTAGCTAAGCTCGTTCAAGAAACGTCATTGGGTCTAACGGGCATCACGTGCCGAA  
CTGCGCATGTTTATGCCATCAAAATCAAAGGCACCTTCTCAATATAGTAATTTTTGATTAAAAATGAAAACG  
TGTAAGATTGTCACCTTTGGAGTAATAACTTGTTCACATATAAAAAAGGCATTGGCTCGAATCTAGGTTGTA  
CCTTTTAGATTTGGATGAAAAATGTAAGGACACTTTTTTTTTTTTACTTGTCCCATGACTTCTCAAACC  
CCAGCTGGTCTGCTTCTCAAGCGCTCTATATCCCTTCCGTAGCAGGCATAAAAAGAAAACACAGACCGG  
ACAAGTCGATGCGCAATGGATTATAGTCATTGTAGTTAATTACAATGTTTTATGCGCTAAACTATGTAGA  
ATATTGGCTGTTGGAAACAACCTCCCTACAACATCTCACAGTTCAAGGCTGGATCTGATTTATCTCTAAAAG  
GAACTGCAACGTGCGCATTGAGCTCATAAAAAAATCTGAACAAAAATGGAATTAATAAATTGAACTGACA  
TCGGTCAATTAGTTGTTGATAACCAACATGTCAATCACTCAGCACTATTAATGGTGTTCCTCAACTAGTG  
AGGAAGGATGTTAGGGAATGAAAAGCCCTTTCCCTCACTACTCGCTGTTCCCTCTTCCCAGGCAGTGTGC  
TGTGCTGATGGAGAGCACTGCTGTCCCAAAGACTACATATGTGATATGAGCAAGACTTCTGCTCTAAGG  
GTGGGGTGGTATCCCATGGTACAACAAGCTGGCAGCTGAGCCACATGACATTGCCCTTACTACCCCTT  
CTCTGTGAAGTGTGACACCAGAACAGATGCCCTGAAGGCTCCAGCTGCTGCCAACTTTCCACAGGACAG  
TGGGGTCTGCCCCCTGCGCAAGGTGTGTGTTTTGTGTGAGCGAGGGTGTGTGTTGGTATGCACATGCGT  
ATAGAGAACCCTAGAAAACAGTTTTGCTCTGCTATCTCACATGGGGAACCTTTCATGTCTGTACCACATCT  
GGCCGTGATTGGGAGTCCCATAGGGCAGCGACAATGGCCAGCGATTGTCCGGGTTTGGCCGGGGTAG  
GCTGTCAATTGTAATAAAGAAATTTGTTCTTAACTGACTTGCTAGTTAAAATAAACTAATTTGTCTCACTG  
TATAGGCTGTGTGCTGTGACAGATGAGGAGCACTGCTGTCCACAGGGCTACAGCTGTAACATGGGCTCAGG  
GACTTGCCAGAAGCTAATGTTTTCTTCACTTCCAGACGGTACCCTAACCCGGGTATCTGCGCTGAGCCC  
CCGACCCACAGGAGAAGGAAATCCACTGTGGGGGGCCGTTTTGCTGCAATAATGAGGAGACATGCTGCA  
AGGCCCTCGCCACTACATGGGCTTGTGTCCCGTTCCAAATGTATGATATACACCTCCGCCCTCTACCA  
CAGACACCACAAACGCTTCTAGAAAATGAAAATGTCATACTAATGTTAGTGGAGTTCAAGACTAAGGCATC  
TACTCTCTTCTATTGAATAGTCAAATTCCTATATGATTTCTCTCATTGCTTTCATCGATGCTTTTTTTTT  
TACTCTCCCTTCCACCTTATCCCTGCTTCTCCACCTGCTCTCTAGGCGGTGTGCTGCAGTGACATGA  
AGCACTGCTGCACTACAGGCTACACCTGTGGTGAAGGGAGGGTCTGCACCCAGTCCACTGGCTTCAAATG  
GGACCACTGGCAGGTGTTCTTCTCAACAAGAAGAGAGCCCTGCATGTGTGACAACATTGGGCCAACCGT  
TGGAGTGATAGGCCCAAACCTCCACCACCAGACGCATTGCACTAATGAAGGGACGCAGGAACTTAATATCA  
CTGTTACAGTATATCAAATTTGTGTTTTTACAGAGGAAAAATATTGTGTGCATATTTAGGAAAAGGGAAGT  
GAAAAATATGTAACATTTTGCACCATTGGTAGGTGCTTGGAAATGTTACTACATTTACTTCAAGAGATACCC  
ATGCTTGTCTATGAACAGAAAATATCAAGATTGTACAGAGGAGCATATAAATGACAAGAACTTAGTACT  
GTTTTACAATGTTTGTATGTTACCTTTTAAACAGGAAGTGTGTTGTTTTTTAGTTGATCGTGTGAAGTGA  
TTGTGCCCTCATAGTTTCAAGGTATACCTTTGAAAATGCTTTTTTACATGACATTTTACATGACATTTTACCTT  
CATTTAACTAGGAAAAGTCAAGTTAAGAACAATTTCTTGTTCAGGGGCAGAACGACAGATTTTACCTTGTG  
AACTCGGGGATTTCGATTTTGCACCTTTTCGGTCACTAGTCCAACACTCTAACCACTAGGCTACCTGCCGC  
CCCATATGCCCTCTGCTTGTGTTGCTACCACGTTTTTAAAGTAAGACATGGATTATCCCACTTCTTGTGTTT  
TACAAATATGCAATTTTAAATAGTCCGTAATGATTTCTGTGTTGCTACCAAAGGGAATTAATAGCTG  
TAAAAATGTAATAAAAAAGTCAATGCCAAATCAGTTGTACAATATGCACGTGTTGGTTTTGTAATCAGTGT  
TCACGCAAAATCTGTGCCAGGATGTAACATATAGTAGGCTTGCAGTAAAAAGGAAAAAACTCAAGAGGT  
GATAAAGGTGAGTACTGAGTGGACTACAGTTGGAGAAAAACCACATTCACGTCTGATACTAATTAC

00024 **S. salar progranulin B** Short name: **S\_salB or salmoB** Date entered: 2014-03

**Species:** *Salmo salar* (Atlantic salmon)

**Taxonomy (via NCBI):** Eukaryota; Metazoa; Chordata; Craniata; Vertebrata; Euteleostomi; Actinopterygii; Neopterygii;

*Teleostei; Euteleostei; Protacanthopterygii; Salmoniformes; Salmonidae; Salmoninae; Salmo.*

**General Comment:** Genomic sequences containing granulin exons predict two variants of the *Salmo salar* B form. The transcript for the one we worked with is fully defined by sequences in the NCBI EST database.

### Protein Sequence

MIGVVCLALLGLTSALICPDGGMCDDENTCCKTPSGGGYGCCPLPNAECCSDHLHCCYEGTVCDLVHSHKCL  
NKTVSLPWRVRVPAQHIISPLMVEGVRAVICPDGESECPDDTTCCLLPDGSWGCCPLAKAVCCEDKMHCC  
PEGTKCDLAHSHKCVSPTLETTFAMREKGPAMKKQTVTCPPGTSRCPDRTTCCLLTIGDYGCCPYLEAVCCT  
DKLHCCPGNTTCDLEHDICTSPNTQTPLAKKTPAVPNDVDCPDKVSSCPDETTCCLLGDRSYGCCPMP  
VCCPDHIHCCPEGTTCDLEQSTCVSEHGQTSMAVKFPATLTTTSLQSTVNAPCNDVACADGTTCKLL  
NGEWACCPLPKAVCCDDHLHCCPHGTICNLAESTCDDPSSGSALVPMLDKVPFASVVSQEEPLPNSICDK  
STLCPGKSTCCKTTTGNWACCPLPNAVCCDDHLHCCPHGTVCNLEASSCDDPLGFNMPWTKVPALTTQA  
QLATEKDEQTIICPGGTTCCRQNSGQWACCPLPHAVCCDDHEHCCPKGYTCNVAEQTCCKAGTSLPWP  
KVPALLLHRVLPQASAPSFPLAKNMCDPHTSCPKYTTCCFMNKSQKGGCCPLPKAVCCANGDHCCPSGYS  
CDVHKTSCTKGPLTIPWYRKEKALTEGAMLKDVKCDKSSCASGATCCKLPTGEWGCCPLPKAVCCDHE  
HCCPQGYSCNMQTGTCEKLVEAIVLSTVPLTKVAESQQRAAEMSIDVKCDSTGEYSCPKLETCKTSPTE  
WSCCPAPKAICTDTRHCCPMGYTCDLERGGCSQQAELTWMDFYSHDKKKDFVVF\*

### Transcript:

**Note:** Transcript sequence is well supported by over 16 EST entries.

The cDNA data define the transcript well (below), so no predicted sequence is required.

### cDNA data:

**From:** NCBI: NM\_001140047.1 GI:213511241

**Note:** A representative cDNA sequence well supported by EST data (contig of GI:89867824, 213068489, 213069977, 213076305, 89857615, 213075008, 85053963, 24342034, 85019727, 213077774, 84971965, 85044879, 89853382, 45309780, 117848278, 85053563)

AGTTGGAGTGTGCGCTTCGAATGAAAAGATTATTTAACTAGTTTGTAGCTTTTACATCGCACACTAACGAAGA  
CTATATGAAGACTATGCATTGCAGTTCCCAACTTGAATAACACATCTGACGATATTCCTCATCTGCCCT  
CTTGCTCTTCTCAGATTCTCTGAACACAATGATAGGGGTGGTATGTCTGGCCCTCCTAGGCCTGACCTCA  
GCCCTGATTTGTCCCGATGGTGGGATGTGTGACGACGAGAACACCTGCTGCAAGACCCCCAGCGGTGGAT  
ATGGCTGCTGTCCATTACCAAAATGCTGAGTGTCTGTTCCGACCACCTGCATTGCTGCTATGAGGGGACAGT  
GTGTGACTTAGTCCACTCCAAGTGCCTCAATAAAAACAGTCTCTCTGCCGTGGGTCAGAAGAGTCCCCGCA  
CAACACATCATCAGCCCTCTGATGGTGGAGGGAGTGAGGGCAGTAATTTGTCCCGACGGCGAGTCGGAGT  
GTCCGGACGACACCACCTGCTGTCAACTCCAGATGGCTCCTGGGGCTGCTGTCCGCTGGCCAAGGCAGT  
GTGCTGTGAGGACAAGATGCACTGCTGTCCAGAGGGCACCAAGTGTGATCTAGCCCACTCCAAGTGTGTG  
TCTCCACCCCTGGAGACCTTTGCCATGAGGGAAAAGGGGCTGCAATGAAGAAGCAGACGGTGACCTGCC  
CAGGTGGTACGAGCAGATGCCAGACAGAACCACCTGTTGCCTGCTGACCATTGGCGACTATGGCTGCTG  
CCCCTACCTGGAGGCTGTGTGCTGTACCGACAACTCCACTGTTGCCCGGGCAATACAACCTGTGACCTG  
GAGCATGATATATGCACTTCCCCAACACACAGACCCCACTGGCTAAGAAGACCCCTGCCGTCCCCAACG  
ATGTGGATTGCCAGACAAGGTGTCATCGTGTCTGATGAGACCACTGCTGCCTGCTGGGGGATAGGAG  
CTATGGCTGCTGCCCTATGCCAAGTGTGTGTGTTGTCCAGACCACATCCACTGCTGTCTGAGGGGAACC  
ACCTGTGACCTGGAACAGAGCACCTGTGTGTCTGAACACGGCCAACTTCCATGGCTGTCAAAATCCCCG  
CCACATTGACCACGACATCCCTACAGAGCACAGTCAATGCTGTGCCCTGCAACGACTCTGTGGCTGCGC  
TGATGGAACCACGTGCTGTAAATTAATAAATGGAGAATGGGCTGCTGCCCGCTACCCAAGGCTGTGTGT  
TGTGATGACCACCTCCACTGCTGCCCCACGGGACCATCTGTAACTGGCAGAGAGTACGTGTGATGACC  
CCTCTTCGGGCTCTGCCCTGGTACCCATGCTGGACAAGGTGCCCGCCTTTAGCTATGTGTGTCGAGGAGGA  
GCCGCTGCCAACAGCATATGTGACAAAATCCACGTTGTGCCCGGGCAAAATCCACGTGCTGCAAGACCACC  
ACAGGAACTGGGCATGCTGCCCCCTGCCAATGCTGTGTGTTGCGATGACCACCTCCACTGCTGCCCCC  
ACGGCACTGTGTGTAACCTGGAGGCCAGTAGCTGCGATGACCCCTTAGGCTTCAACATGCCGTGGGTAC  
CAAGGTGCCAGCACTACCACCCAGGCACAACCTGGCCACTGAGAAGTGTGACGAACAGACCAATTTGCCCC  
GGGGGACACCACCTGCTGCAGACAGAACCTCAGGACAGTGGGCATGCTGTCTCTACCTCATGCGGTGTGCT  
GCGATGACCACGAGCACTGCTGCCCTAAAGGCTACACGTGTAATGTGGCCGAGCAGACCTGTGACAAAAGC  
TGGGACCCTCAGCTTGGCCCTGGATCCCCAAGGTGCCAGCCCTGCTCCTGCACAGAGTGTCTCTCAAGCC  
AGTGGCCCCCTCCTTCCCCCTAGCCAAGAACATGTGTGACCCCCACACCAGCTGTCCCAAATATACCACTT  
GCTGCTTCATGAACAAGTCTGGCAAGTGGGGATGTGCCCCCTGCCAAAGGCGGTGTGCTGTGCCAACGG  
AGACCACTGCTGCCCCAGCGGCTACAGCTGTGATGTCCACAAGACCTCCTGCACTAAGGGCCCCCTGACC  
ATTCCCTGGTACCGCAAAGAGAAGGCCCTGACTGAGGGAGCCATGTTGAAAAGACGTAAAAGTGTGACGACA  
AGAGCAGCTGTGCCCTCGGGGGCCACCTGCTGCAAGTTGCCACGGGCGAATGGGGCTGCTGTCCCCCTGGT

CAAGGCTGTTTGTGTACAGACCATGAGCACTGCTGCCCCAGGGCTACAGCTGCAACATGCAGACTGGG  
ACCTGTGAGAACTGGTAGAGGCTATAGTCTCAGTACGGTGCCCTGACAAAAGGTAGCAGAGTCCCAGC  
AGAGGGCAGCAGAGATGAGTATAGATGTGAAGTGTGACAGCACTGGAGAGTACAGCTGTCCAAAAGTGA  
AACCTGTGTAAAGACCTCACCCACAGAATGGTCTGTGCCCTGCACCAAAGGCCATATGTGCACGGAC  
ACCAGGCACTGCTGCCCCATGGGATACACATGTGACCTGGAGCGGGGAGGCTGCTCCAGCAGGCTGAGT  
TGACCTGGGACATGTTCTACAGCCATGACAAAAAGAAAGACTTTTGTCCGTTTTGACTTTGAGCTAAATC  
GGGAAGCACTGATCTGGACTCTGAGCCAATCAGGATGCAGCACTGATCTGATGTTCTCACTCCAGCACA  
CAACCTAACCTGCAGAACATTCCATAAGAGGAACAAAACCTTATGGACACTGGACAAGGGACAGGAGA  
TTTATTTTGTATGTTTTTTTTGTGTAAGTGATTTGATTTGGTTCAATTGGGGTAGAACAGGAAATAGAAA  
TGGTTGGAAGTAGAGAAATCAGCATCTCCATCCAATGCCATCCCAAAGTTTTATTTTTTATTATTTTAA  
AGCAGCTAGCTTGTAGGTTTTGTCTCAATGTCTTTACGCTTGTACTACTGCCCATATGCCATTTTTCTCT  
ATGCAAAATGAGAAAAGATGAATGTATTATACTCTCTTGGAAACAAGAATTATCATTCTCCAGAATAAGCCTG  
CTTTAAGATGTATCAAAAATGTATTTTATCCAAACTCTTTCAAGAACACAGCTACATAGTACAAGAGAG  
CTGATTTTTTCATGTTTTCTTGTGCAGGCACAACCTAGCATTAGTGAGCGTTAGTATATCGTTCTTTCTG  
GATGCACTACAGAGCCATTGATCAGCCGACAGTGTACTTTGATTGAACTTTTTGCTCGATTTAAAAAAA  
AAAAAAAAAAAAATGTATGTATGTTTTGCCCTCTGGCCTGGGTTTCATCACTTTCTGTGAACATCAAAAATGGT  
CCAGCCTCTGACAGTTTTCTGTCATTAATAAACAATACTGTCACCTCAAACCCCTTAAGTCATAGCCAT  
TTTTTCTTGATGTCATAATGCCCATTTGTTGATAAACTTTTTGATTTTCAGTATAGGAATTATTGGTAAACC  
CCAGTTTAATGGTTTTCTACATGCAATTTGTGGTGTCTGAACAGGTGATGGGGAAGTGAATCCAGTATGAT  
TGGTTAGTACAATGTTAGTTGATAAACAATAAAGCACTCTGTTCTACCAGCCGTTGTAATGCT  
AACCAGTAATAATACTTTGAAAAGTCAATGCAACAATAACCAGTGAGCACATAGCTCTCATCCCATTCCCG  
ACTAATGTCCCAAATTTGTATCTGTACTCTATAGTTTTGTTTTGGATTTGTTTTTTTTTACATGAATG  
TCATGTTAAACGAAGGACATGTTTTCTGGTTAATTATAGTTTTCTTTATCATATATTTTATCTTTTGAAGG  
GGAGTTCTGTGTCAGTGTATGCCACTGAGGTGAAAATAAAATGTTTTTTGTTCTTCGGTAGGGAAAACCAT  
TTTGTGTTGAGCTGCACTATAGTACAATAATAAACAATGGATGAGTCATGTTTTTTGTCTGAAAAAAAAA

#### Genomic data:

**Note:** Genomic structure and sequence from AGKD01009690.1 GI:354449353, AGKD01115372.1 GI:354343369, AGKD01153924.1 GI:354304604, and AGKD01010990.1 GI:354448053.

From NCBI: AGKD01009690.1 GI:354449353

**Note:** Contains the first 5 exons for the cDNA sequence in the forward direction at the end of the contig. The start codon is at the end of the second exon.

No exon sequence to show (or no genomic sequence entry).

#### Coding exon 1 Exon type: sn

ATAGGGGTGGTATGTCTGGCCCTCCTAGGCCCTGACCTCAGCCCTGATTTGTCCCGATGGTGGGATGTGTG  
ACGACGAGAACACCTGCTGCAAGACCCCCAGCGGTGGATATGGCTGCTGTCCATTACCAAAAT

#### Coding exon 2 Exon type: c

GCTGAGTGCTGTTCCGACCACCTGCATTGCTGCTATGAGGGGACAGTGTGTGACTTAGTCCACTCCAAGT  
GCCTCAATAAAAACAGTCTCTCTGCCGTGGGTCAGAAGAGTCCCCGCACAACACATCATCAGCCCTCTG

#### Coding exon 3 Exon type: n

ATGGTGGAGGGAGTGAGGGCAGTAATTTGTCCCGACGGCGAGTCCGAGTGTCCGGACGACACCACCTGCT  
GTCAACTCCAGATGGCTCCTGGGGCTGCTGTCCGCTGGCCAAG

From NCBI: AGKD01115372.1 GI:354343369

**Note:** Contains coding exons 4 to 6.

#### Coding exon 4 Exon type: c

GCAGTGTGCTGTGAGGACAAGATGCACTGCTGTCCAGAGGGCACCAGTGTGATCTAGCCCACTCCAAGT  
GTGTGCTCCCACCTGGAGACCTTTGCCATGAGGGAAAAGGGGCTGCAATGAAGAAGCAGACG

#### Coding exon 5 Exon type: n

GTGACCTGCCAGGTGGTACGAGCAGATGCCAGACAGAACCACCTGTTGCCTGCTGACCATTGGCGACT  
ATGGCTGCTGCCCCCTACCTGGAG

#### Coding exon 6 Exon type: c

GCTGTGTGCTGTACCGACAAAACCTCACTGTTGCCCGGGCAATACAACCTGTGACCTGGAGCATGATATAT  
GCACCTCCCCAACACACAGACCCCACTGGCTAAGAAGACCCCTGCCGTCCCCAACGAT

From NCBI: AGKD01153924.1 GI:354304604

**Note:** Contains coding exons 7 to 13.

**Coding exon 7 Exon type: n**

GTGGATTGCCAGACAAGGTGTCATCGTGTCTGATGAGACCCTTGCTGCCTGCTGGGGATAGGAGCT  
ATGGCTGCTGCCCTATGCCAAGT

**Coding exon 8 Exon type: c**

GCTGTGTGTTGTCAGACCACATCCACTGCTGTCTGAGGGAACCACCTGTGACCTGGAACAGAGCACCT  
GTGTGCTGAACACGGCCAAACTTCCATGGCTGTCAAATTCCTCCGCCACATTGACCACGACATCCCTACA  
GAGACA

**Coding exon 9 Exon type: n**

GTCAATGCTGTGCCCTGCAACGACTCTGTGGCCTGCGCTGATGGAACCACGTGCTGTAAATTACTAAATG  
GAGAAATGGGCCTGCTGCCCCGTACCCAAG

**Coding exon 10 Exon type: cn**

GCTGTGTGTTGTGATGACCACCTCCACTGCTGCCCCACGGGACCATCTGTAACCTGGCAGAGAGTACGT  
GTGATGACCCCTCTTCGGGCTCTGCCCTGGTACCCATGCTGGACAAGGTGCCCGCCTTTAGCTATGTGTC  
GCAGGAGGAGCTGCTGCCAACAGCATATGTGACAAAATCCACGTTGTGCCCGGGCAAATCCACGTGCTGC  
AAGACCACACAGGAAACTGGGCATGCTGCCCCCTGCCCAAT

**Coding exon 11 Exon type: cn**

GCTGTGTGTTGCGATGACCACCTCCACTGCTGCCCCACGGCACTGTGTGTAACCTGGAGGCCAGTAGCT  
GCGATGACCCCTTAGGCTTCAACATGCCGTGGGTACCAAGGTGCCAGCACTACCCACCCAGGCACAACCT  
GGCCACTGAGAAGTGTGACGAACAGACCATTGCCCCGGGGCACCACCTGCTGCAGACAGAACTCAGGA  
CAGTGGGCATGCTGTCTCTACCTCAT

**Coding exon 12 Exon type: cn**

GCGGTGTGCTGCGATGACCACGAGCACTGCTGCCCTAAAAGGCTACACGTGTAATGTGGCCGAGCAGACCT  
GTGACAAAAGCTGGGACCCTCAGCTTGCCCTGGATCCCCAAGGTGCCAGCCCTGCTCCTGCACAGAGTGTCT  
TCTCAAGCCAGTGCCCCCTCCTTCCCCCTAGCCAAGAACATGTGTGACCCCCACACCAGCTGTCCCCAAA  
TATACCACTTGCTGCTTCATGAACAAGTCTGGCAAAGTGGGGATGCTGCCCCCTGCCAAAAG

**Coding exon 13 Exon type: cn**

GCGGTGTGCTGTGCCAACGGAGACCACTGCTGCCCCAGCGGTACAGCTGTGATGTCCACAAGACCTCCT  
GCCTAAGGGCCCCCTGACCATTCCCTGGTACCGCAAAGAGAAGGCCCTGACTGAGGGAGCCATGTTGAA  
AGACGTAAGTGTGACGACAAGAGCAGCTGTGCCTCGGGGGCCACCTGCTGCAAGTTGCCACGGGCGAA  
TGGGGCTGCTGTCCCCTGGTCAAG

From NCBI: AGKD01010990.1 GI:354448053

**Note:** Contains coding exons 14 to 15 and completes the salmoB progranulin gene.

**Coding exon 14 Exon type: cn**

GCTGTTTGCTGTACAGACCATGAGCACTGCTGCCCCAGGGCTACAGCTGCAACATGCAGACTGGGACCT  
GTGAGAACTGGTAGAGGCTATAGTCTCAGTACGGTGCCCTGACAAAGGTAGCAGAGTCCCAGCAGAG  
GGCAGCAGAGATGAGTATAGATGTGAAGTGTGACAGCACTGGAGAGTACAGCTGTCCAAACTGGAAACC  
TGCTGTAAGACCTCACCCACAGAATGGTCTGCTGCCCTGCACCAAAG

**Coding exon 15 Exon type: c**

**Note:** up to the stop codon.

GCCATATGCTGCACGGACACCAGGCACTGCTGCCCCATGGGATACACATGTGACCTGGAGCGGGGAGGCT  
GCTCCAGCAGGCTGAGTTGACCTGGGACATGTTCTACAGCCATGACAAAAAGAAAGACTTTGTTCCGTT  
TTGA

**Genomic sequence note:** A genomic sequence is not presented (see note 2 in header).

---

00025 **S. salar progranulin C** Short name: **S\_salC or salmoC** Date entered: 2014-03

**Species:** *Salmo salar* (Atlantic salmon)

**Taxonomy (via NCBI):** Eukaryota; Metazoa; Chordata; Craniata; Vertebrata; Euteleostomi; Actinopterygii; Neopterygii; Teleostei; Euteleostei; Protacanthopterygii; Salmoniformes; Salmonidae; Salmoninae; Salmo.

**General Comment:** There is a discrepancy in sequences through the second coding exon which is of the cn type. Two out of three EST sequences read through nicely, while the third has the same additional A found in three trace archive

wgs sequences which presumably contributed to the assembly of AGKD01126159.1. This extra A shifts the frame just before the second Cys codon for the N-half module, and would terminate translation about 23 codons further, despite there being good sequence from the c-n-c exons downstream. This could represent a mutant allele if it is not a sequencing artifact. We used the 2/3 majority EST cDNA sequence in the analysis.

### Protein Sequence

KMWSIAALVILVLTGSASCYITCPGGKVCSDQSTCCCLTKGGYACCPVNAVCCSDMAHCCPSGFNCNAITQ  
KCEKGDHPWSSVPMNLNKVAAEPESSPVSAPLQSDSSPVQSNVAVSSSMVGKVVQCDNYACPDGTTCCCHHPT  
GLWFCCPYSPGRCCLDGYHCCPYGYDCDPTYTKCVRYGNLRYPFAPRQAPSMIEAIKVKPENKVHDQQV  
SWTALVQAADSTPQAGVTHCDTKFYCPSATSCKGPNKGWCCPFPLAKCCADGLHCCEYGYTCDPNSYK  
CRKWYSQIPSGLKDEANQD\*

### Transcript:

**Note:** The transcript is defined by an EST contig.

The cDNA data define the transcript well (below), so no predicted sequence is required.

### cDNA data:

**From:** NCBI: EST contig from GI: (223564584, 29327546, 223564585, 24392971)

**Note:** cDNA sequence data:

TTGGCCAACTTTTTTGTACAAAAGTTGTCCCAACTGAGAACAATATCAAGGCTAAGATGTGGAGCATAGC  
TGCATTGGTGTAGTGTGCTGACAGGGTCTGCCTCTTGCTACATCACCTGCCCTGGTGGGAAGGTCTGCTCT  
GATCAATCAACCTGTTGTTGACTAAAAGGAGGATACGCCTGCTGTCCAGTTCCCAATGCGGTGTGTTGCT  
CTGACATGGCCCACTGTTGCCCGTCAGGCTTCAACTGCAATGCCATCACCCAGAAGTGTGAGAAAAGGCGA  
CCATCCATGGAGCAGTGTGCCCATGCTGAACAAGGTGGCTGCAGAGGAACCAAGCTCTCCTGTCTCTGCT  
CCGCTCCAGTCTGACAGCAGCCCTGTCCAGAGCAATGCAGTGGAGAGCTCCATGGTCCGCAAGGTGCAAT  
GTGACAACTATTATGCTTGTCCCGATGGCACCACCTGCTGCCACCACCCACAGGCTGTGGTTCTGCTG  
TCCGTACTCTCCTGGTAGGTGCTGTCTAGATGGGTACCCTGCTGTCCCTACGGCTATGACTGTGACCCC  
ACATACACTAAGTGTGTGAGGTACGGCAACCTGAGGTACCCTTTTCGCTCCGAGGCAGGCCCTTCAATGA  
TCGAAGCCATCAAGGTCTCCAAAACCGGAAAACAAGGTCCACGATCAGCAGGTCTCATGGACAGCTCTAGT  
TCAGGCCGCTGACAGCACGCCACAGGCTGGAGTCACTCACTGTGACACTAAATTCTATTGTCTTCTGCA  
ACCAGCTGCTGCAAGGGACCTAATGGCAAATGGGGATGTTGCCCATTCCCCTGGCGAAGTGTGTTGCGG  
ATGGCCTGCATTGCTGTGAATATGGATACACCTGTGACCCAAACTCATACAAGTGCAGGAAATGGTACTC  
TCAGATTCTTTCAGGTCTGAAGGATGAGGCTAATCAGGACTGACACTATTTCAAATTGTTTATGATCTTG  
TCACTGTACTGACATTGGATTGTACCTTTTGTGAATGCATTGTAATTTAACCTTGCACTGATGAATACAA  
GAATGTTAATCAGTCACCCAATCATT

### Genomic data:

**Note:** Genomic sequence is mostly in AGKD01126159.1 GI:354332369 (see general comment on sequence discrepancy), and ends in AGKD01460049.1 GI:353998421

From NCBI: AGKD01126159.1 GI:354332369

**Note:** Contains all but the last coding exon

**Coding exon 1 Exon type: sn**

**Note:** from the start codon (which is at the beginning of this exon).

ATGTGGAGCATAGCTGCATTGGTGTAGTGTGCTGACAGGGTCTGCCTCTTGCTACATCACCTGCCCTGGTG  
GGAAGTCTGCTCTGATCAATCAACCTGTTGTTGACTAAAAGGAGGATACGCCTGCTGTCCAGTTCCCAA  
T

**Coding exon 2 Exon type: cn**

**Note:** Important: The discrepant additional A has been removed to force this exon to conform with the majority cDNA sequence and a well-formed cn exon.

GCGGTGTGTTGCTCTGACATGGCCCACTGTTGCCCGTCAGGCTTCAACTGCAATGCCATCACCCAGAAGT  
GTGAGAAAAGGCGACCATCCATGGAGCAGTGTGCCCATGCTGAACAAGGTGGCTGCAGAGGAACCAAGCTC  
TCTGTCTCTGCTCCGCTCCAGTCTGACAGCAGCCCTGTCCAGAGCAATGCAGTGGAGAGCTCCATGGTC  
GGCAAAGTGCAATGTGACAACTATTATGCTTGTCCCGATGGCACCACCTGCTGCCACCACCCACAGGCC  
TGTGGTTCTGCTGTCCGTACTCTCTCT

**Coding exon 3 Exon type: c**

GGTAGGTGCTGTCTAGATGGGTACCCTGCTGTCCCTACGGCTATGACTGTGACCCACATACACTAAGT  
GTGTGAGGTACGGCAACCTGAGGTACCCTTTTCGCTCCGAGGCAGGCCCTTCAATGATCGAAGCCATCAA

GGTCTCAAACCGGAAAAACAAGGTCCACGATCAG

**Coding exon 4 Exon type: n**

CAGGTCTCATGGACAGCTCTAGTTCAGGCCGCTGACAGCCCGCCACAGGCTGGAGTCACTCACTGTGACA  
CTAAATTCATTGTCTTCTGCAACCAGCTGCTGCAAGGGACCTAATGGCAAATGGGGATGTTGCCCAT  
CCCCTG

From NCBI: AGKD01460049.1 GI:353998421

**Note:** Contains only the last exon and does not overlap with AGKD01126159.1.

**Coding exon 5 Exon type: c**

**Note:** up to the stop codon.

GCGAAGTGTGTGCGGATGGCCTGCATTGCTGTGAATATGGATACACCTGTGACCCAAAACATACACAAGT  
GCAGGAAATGGTACTCTCAGATTCTTCAGGTCTGAAGGATGAGGCTAATCAGGACTGA

**Genomic sequence note:** A genomic sequence is not presented (see note 2 in header).

---

00007 **T. rubripes progranulin B** Short name: **T\_rubB or fuguB** Date entered: 2014-03

**Species:** *Takifugu rubripes (Fugu rubripes) (Japanese pufferfish)*

**Taxonomy (via NCBI):** *Eukaryota; Metazoa; Chordata; Craniata; Vertebrata; Euteleostomi; Actinopterygii; Neopterygii; Teleostei; Euteleostei; Neoteleostei; Acanthomorpha; Acanthopterygii; Percomorpha; Tetraodontiformes; Tetradontoidea; Tetraodontidae; Takifugu.*

**General Comment:**

**Protein Sequence**

MTALQTSILLLLALLNLSAALVCPDGGTCEDRNTCCRNNSAGGYSCCPLPHAEECCSDHLHCCYQGTLCDDLEH  
HKCVNKTIVSLPWLRLPAAAPRVQAGLTGVICPDSKTMCPDGATCCQLPSGSMGCCLF SNAVCCEDKLHCC  
PEGTRCDLARSKCVSPSQWFPMMHKVPATTRAHPEASIIICPDGKSRQCQLGHTCCQLASGAYGCCPLQQ  
AVCCSDHERCCPAGTRCDLEHDACVSGATPVPMRLIAAVPGEATPVVPIKIDNNKCDESTTICPGDSTCC  
RTLEGGWACCPAQAVCCDDHVHCCPHDTICNLETQTCDDGQSGGRPPLRWVEKVPASTSAVQCDEQTS  
GGSTCKMASGQWACCPLEAVCCSDGEHCCPKGYRCNLAVQTCDDVAGGDRPWLRLKVPARQEEPSGAAS  
GPAPAGVMCDRTSCPRDTSCCFMQETRRWGCPVNAVCCEDGDHCCPRGHRCDPHRRSCKGPLVTP  
WFTKLSAATRPGAVTDVPCDDRSSCPAGTTCCCKLKS GGWGCCPLVKAVCCNDHEHCCPQGYSCNTETGTC  
EKKDHGAPVFAVPQRRVLESRSRGAQGVLS CGGTGEFHCPKEDTCCPTSATEWACCPSPRAVCCSDQKHC  
CPAGFSCDPSGGCVQDLSSWDAWFDRSARGGL\*

**Transcript:**

**Note:** Incomplete direct cDNA sequence data. Limited est sequence data available at time of entry.

**Predicted sequence:**

**Note:**

**Derivation:** NCBI XM\_003961109.1 GI:410895340 (also JGI: Takru4|622326|estExt\_GW.C\_1300089)

tccgccttggtttctcctgcgaaatttgcctttaggagcaacgttaatgtgacagctggacaaactgcgc  
cggacaggttcggagatgtacacttgtgccttttgttgctaataacctgaagtcttctactccaacaag  
acagctgctaataatgacggctctgcagacgtcgatcctgcttctggctctcctcaacctgagcgcggcg  
ctggtttgtcctgatggaggcacgtgtgaggacaggaacacctgctgcaggaaactccgcaggtggataca  
gctgctgcccgctaccgcatgctgaatgttgcctccgacctctgcaactgctgctaccaggggacgctttg  
tgacctggaacaccacaaaatgtgtcaacaaaaacggtttctttgccctggttgagccgacttctgccgcc  
cctcgggtccaggctgggctgactggggtcatctgctcctgatctctaaagacctgtgtccggatggcgcca  
cttgcctgccagcttcccagtggttccatgggctgttgccctgttcagcaacgccgtgtgctgcgaggacaa  
gctccaactgttgcccggaaggaaacgaggtgtgatctcgctcgctccaagtgcgtttcgccatcgcagcag  
tggttccccatgatgcacaaaagtccggccaccacgagagcagagcatccagaggcttctataatatgtc  
ctgatggaaaaagccgctgccaaactcggccacacatgctgccagctagccagcggcgctacggctgctg  
cccgctccaacaggctgtgtgctgcagcgtcacgagcgtgctgccctgcaggcacgcgctgcgacctg  
gagcacgacgcctgtgtgtccggcgccacgccagctcccaatgctgaggatcgccgcccgtccccggcgaag  
gcgacgacgcctgtgttccaatcaagatgcacaaacaaagtgcgacgagctccacgacgtgtcccgggga  
ctccacctgctgtaggacgctagaaggcggctgggctgttgcccttgccgaggtgtgtgctgtgac  
gatcacgtccaactgctgccctcacgacacctctgtaacctggagactcaaacctgcgacggccagtcgg  
ggggtcgtcctcccctccgctgggttgaaaaaggtgcctgcgtccacctcggcggtgcagtgcgacgagca



aacgtcgtgtccgggaggtccacctgctgcaaaaatggcgtcgggtcagtgggcctgctgcccgctgct  
gagccgtgtgctgcagcagatggcgagcactgctgtcctaaaggctaccgatgtaacctggcggtccaga  
cctgtgacgtggccggcggagacactcgccgtggctgcggaaggttccggcccgccaggaggagccag  
cgggcgggcgtccggtccggctcgccagccggggtcatgtgtgacgaccggaccagctgccctcgagac  
accagctgctgcttcatgcaggagacgcgcccgatggggctgctgccccgtcccgaacgcggtttgtgtg  
aggacggggaccactgctgccccagggggaccgctgtgacccccaccgcccgttctgctcaaagggcc  
cctggttacgccctggttaccaaaactgagcgcgcgactcgccggggcgcgcttacggacgtcccgtgt  
gacgaccggagcagctgtccggcaggaaccacctgctgcaagctgaagagcggagggtggggctgctgcc  
cgctggtcaaggcgtgtgctgcaacgaccacgagcactgctgtcctcagggtacagctgcaacacgga  
gacgggcacgtgcgagaagaaggaccacggcgcgcccgtctttgctgtccccagaggagggtgctagag  
tccaggtccagaggagcccaaggcgtcctgtcatgtggaggcacgggggaattccactgtcccaaggagg  
aacttctgctgtccaacatcagccacagagtgggcctgctgcccctcaccgagggccgtgtgctgctcaga  
ccagaagcactgctgtcccgtggattctcctgtgacccgtctggaggctgcgtccaggacctgtcctcc  
tgggacgcctggtttgataggtccgcccaggtggactttaa

**cDNA data:**

**From:** NCBI est: GI: (25134870, 26775899, 21879548, 22020914)

**Note:** A cDNA contig encoding the signal peptide and first 4 modules.

TCCGCCTTGGTTTCTCCTGCGAAATTTGCCTTTAGGAGCAACGTTAATGTGACAGCTGGACAAACTGCGC  
CGGACAGGTTTCGGAGTATGTACACTTTGTGCTTTTGTGCTAATACTGAAGTTCTTCTACTCCAACAAG  
ACAGCTGCTAATAATGACGGCTCTGCGAGCCTGCATCCTGCTTCTGGCTCTCCTCAACCTGAGCGGGCG  
CTGGTTTGTCTGATGGAGGCACGTGTGAGGACAGGAACACCTGCTGCAGGAACCTCCGACAGGTGGATA  
GCTGCTGCCGCTACCGCATGCTGAATGTTGCTCCGACCATCTGCACTGCTGCTACCAGGGGACGCTCTG  
TGACCTGGAACACCACAAAATGTGTCAACAAAACGCATTCTGTGCCCTGGTTGAGCCGACTTCTGCGCC  
CCTCGGGTCCAGGCTGGGCTGACTGGGGTCACTGTCTGATTCTAAGACCATGTGTCCGGATGGCGCCA  
CTTGTGCCAGCTTCCCAGTGGTTCCATGGGCTGTGCTGTTTCCAGCAACGCCGTGTGCTGCGAGGACAA  
GCTCCACTGTTGCCCGAAGGAACGAGGTGTGATCTCGCTCGCTCCAAGTGCCTTTCGCCATCGCAGCAG  
TGGTTCCCCATGATGCACAAAAGTTCCGGCCACCACGAGAGCAGAGCATCCAGAGGCTTCTATAATATGTC  
CTGATGGAAAAAGCCGTGCCAACTCGGGCCACACATGCTGCCAGCTAGCCAGCGGGCCCTACGGCTGCTG  
CCCCTCCAACAGGCTGTGTGCTGCAGCGATCACGAGCGCTGCTGCCCTGCAGGCACGCGCTGCGACCTG  
GAGCAGCAGCCTGCGTGTCCGGCGCCACGCCAGTCCCAATGCTGAGGATCGCCGCCCTCCCCGGCGAAG  
GCGCGACGCTGTGTTGCCAATCAAGATCGACAACAACAAGTGCAGAGTCCACGACGTGTCCCGGGGA  
CTCCACCTGCTGTAGGACGCTAGAAGGAGGCTGGGCTGTGCCCCGTTGGCGCAGGCTGTGTGCTGTGAC  
GATCACGTCCACTGCTGCCCTCACGACACCATCTGTAACCTGGAGACTCAAACCTGCG

**From:** NCBI est: GI: 22020841

**Note:** This cDNA fragment includes module 5.

AACCTGGAGACTCAAACCTGCGACGGCCAGTCGGGGGGGGCGGCCCTCCCCTCCGCTGGGTTGAAAAGGCGC  
CTGCAGCCACCTCGGCGGTGCAGTGCAGCAGACAAACGTCGTGTCCGGGAGTCTCCACCTGCTGCAAAAT  
GGCGTCGGGTCAGTGGGCTGCTGCCCGCTGCTGAGGCCGTGTGCTGCAGCGATGGCGAGCACTGCTGC  
TCTAAAGGCTACCGATGTAACCTGGCGGGCCAGACCTGACGGGGCCG

**From:** NCBI est: GI: 24550509

**Note:** Reverse complement of the cDNA fragment. It encodes most of the last module and has 3'ut

TTTTTTTTCAATCTCCAAAGGCAGATTTGCCGATTTTATTACTGGATGAAAACCTGCAAAATAAAAAATA  
AACCTTTAAAAACACAAACCAACCAATGCTCAGAAAAAAAAGAAAACTTTAAAAATTACACAGATAC  
TTTGCCATCAATGTTTTATAACAAAAGACAATTAGAACCACATTGAAAGAGTTCTGGAATGGTTTTCCCA  
GGAGAAAATATTCAGAACTCTTCAACTTCTGTTACCAATACAGCACGCTATATGGAGTGCAGAAGCG  
TCCAGAGCGAAGGAAAAGAGGAGTTTAGAGCCTTCAACCATCTGGTTTTAAAGTCCACCTCGGGCGGAC  
CTATCAAACCAGGCTCCAGGAGGACAGGTCTGGACGACGCTCCAGACGGGTACAGGAGAATCCAG  
CGGGACAGCAGTGTCTTCTGGTCTGAGCAGCACAGGCCCTCGGTGAGGGGCAGCAGGCCACTCTGTGGC  
TGATGTTGGACAGCAAGTGTCTCTTGGGACA

**Genomic data:**

**Note:** Genomic data for coding exon structure is in [gil409211590:1774463-1780861](#) Takifugu rubripes chromosome 1  
From NCBI: GI: 409211590

**Note:** Progranulin coding sequences contained within the range 1774463-1780861.

No exon sequence to show (or no genomic sequence entry).

**Coding exon 1** Exon type: **sn**

GCTCTGCAGACGTCGATCCTGCTTCTGGCTCTCCTCAACCTGAGCGGGCGCTGGTTTGCCTGATGGAG  
GCACGTGTGAGGACAGGAACACCTGCTGCAGGAACTCCGCAGGTGGATACAGCTGCTGCCCCTACCGCA  
T

**Coding exon 2 Exon type: cn**

GCTGAATGTTGCTCCGACCATCTGCACTGCTGCTACCAGGGGACGCTTTGTGACCTGGAACACCACAAAT  
GTGTCAACAAAACGGTTTCTTTGCCCTGGTTGAGCCGACTTCTGCGCCCTCGGGTCCAGGCTGGGCT  
GACTGGGGTCACTGTCCTGATTCTAAGACCATGTGTCCGGATGGCGCCACTTGTGTCAGCTTCCCAGT  
GGTCCATGGGCTGTTGCCTGTTACAGCAAC

**Coding exon 3 Exon type: c**

GCCGTGTGCTGCGAGGACAAGCTCCACTGTTGCCCCGGAAGGAACGAGGTGTGATCTCGCTCGCTCCAAGT  
GCGTTTCGCCATCGCAGCAGTGGTTCCCCATGATGCACAAAAGTTCCGGCCACCACGAGAGCAGAGCATCC  
AG

**Coding exon 4 Exon type: n**

AGGCTTCTATAATATGTCCTGATGGAAAAAGCCGCTGCCAACTCGGCCACACATGCTGCCAGCTAGCCAG  
CGGCGCTACGGCTGCTGCCCCTCCAACAG

**Coding exon 5 Exon type: c**

GCTGTGTGCTGACGATCACGAGCGCTGCTGCCCTGCAGGCACGCGCTGCGACCTGGAGCACGACGCCT  
GTGTGTCCGGCGCCACGCCAGTCCCAATGCTGAGGATCGCCGCCGTCCCCGGCGAAG

**Coding exon 6 Exon type: n**

GCGCGACGCCTGTTGTTCCAATCAAGATCGACAACAACAAGTGCAGACGAGTCCACGACGTGTCCCGGGGA  
CTCCACCTGCTGTAGGACGCTAGAAAGCGGCTGGGCTGTTGCCCGTTGGCGCAG

**Coding exon 7 Exon type: cn**

GCTGTGTGCTGTGACGATCACGTCCACTGCTGCCCTCACGACACCATCTGTAACCTGGAGACTCAAACCT  
GCGACGGCCAGTCCGGGGGTCGTCTCCCTCCGCTGGGTTGAAAAGGTGCCTGCGTCCACCTCGGCGGT  
GCAGTGCAGACGACAAACGTCGTGTCCGGGAGGCTCCACCTGCTGCAAAAATGGCGTCGGGTCACTGGGCC  
TGCTGCCCGCTGCCTGAG

**Coding exon 8 Exon type: cn**

GCCGTGTGCTGACGATGGCGAGCACTGCTGTCTTAAAGGCTACCGATGTAACCTGGCGGTCCAGACCT  
GTGACGTGGCCGGCGGAGACTCGGCCGTGGTGCAGGAGGTTCCGGCCCGGAGGAGGCCAGCGG  
GGCGGCTCCGGTCCGGTCCGGCCAGCCGGGTCATGTGTGACGACCGGACCAGCTGCCCTCGAGACACC  
AGCTGCTGCTTCATGCAGGAGACGCGCCGATGGGGCTGCTGCCCCGTCCCGAAC

**Coding exon 9 Exon type: cn**

GCGGTTTGTGTGAGGACGGGGACCACTGCTGCCCCAGGGGGCACCGCTGTGACCCCCACCGCCGTTCTT  
GCTCAAAGGGCCCCCTGGTTACGCCCTGGTTACCAAACCTGAGCGCCGCGACTCGGCCGGGCGCCGTTAC  
GGACGTCCCGTGTGACGACCGGAGCAGCTGTCCGGCAGGAACCACTGCTGCAAGCTGAAGAGCGGAGGG  
TGGGGCTGCTGCCCGCTGGTCAAG

**Coding exon 10 Exon type: cn**

GCGGTGTGCTGCAACGACCACGAGCACTGCTGTCTCAGGGCTACAGCTGCAACACGGAGACGGGCACGT  
GCGAGAAGAAGGACCACGGCGCGCCGCTTTGCTGTCCCCAGAGGAGGGTGCTAGAGTCCAGGTCCAG  
AGGAGCCCAAGGCGTCTGTGATGTGGAGGCACGGGGAAATCCACTGTCCAAGGAGGACACTTGTGT  
CCAACATCAGCCACAGAGTGGGCTGCTGCCCTCACCAGG

**Coding exon 11 Exon type: c**

GCCGTGTGCTGCTCAGACCAGAAGCACTGCTGTCCCGCTGGATTCTCTGTGACCCGCTGAGGCTGCG  
TCCAGGACCTGTCTCTGGGACGCTGGTTTGATAGGTCCGCCCGAGGTGGACTTTAA

**Genomic sequence note:** A genomic sequence is not presented (see note 2 in header).

---

00008 **T. rubripes progranulin C** Short name: **fuguC** Date entered: 2014-03

**Species:** *Takifugu rubripes* (*Fugu rubripes*) (*Japanese pufferfish*)

**Taxonomy (via NCBI):** Eukaryota; Metazoa; Chordata; Craniata; Vertebrata; Euteleostomi; Actinopterygii; Neopterygii;

*Teleostei; Euteleostei; Neoteleostei; Acanthomorpha; Acanthopterygii; Percomorpha; Tetraodontiformes; Tetradontoidea; Tetraodontidae; Takifugu.*

**General Comment:**

**Protein Sequence**

MSKLTLCVLVAGAILLGVVACVKCPDGHQCTDKETCCQGTGKYNCCPYPDVAVCCSDKTHCCPSGYTCNLAE  
QMCEKQNLFPWFRIIPVMEEAEKSSASVLPVYFSRVEDSRVPAEEKSSVLCNDHYRCPDGTTCRNLGG  
WFCCPYSPGSCCQDGYHCCPMGYHCDPTYRYCLQQGLRYPFTARKQPPVPAALIVASEERSGLLERPMM  
PLKKLSNDMQDAGGVQCDSTFVCPADMTCCCKGPQGWSSCCPFRLGQCCADGQHCEEYGYTCSSSSVSCKK  
SFSQ\*

**Transcript:**

**Note:** Incomplete direct cDNA sequence data. Limited est sequence data available at time of entry.

**Predicted sequence:**

**Note:**

**Derivation:** NCBI: XM\_003969392.1 GI:410911925 (also JGI: Takru41553464le\_gw2.37.302.1)

ATGTCGAAGTAACTCTGTGTCTGGTGGCCGGTGCATCCTGCTGGGGGTTGTAGCCTGTGTCAAATGCC  
CCGATGGGCATCAATGCACAGACAAAGAGACTTGTGTGCAGGGGACGAAAGGCTACAACCTGTGTCCATA  
TCCAGATGCCGTGTGTTGCTCTGACAAGACCCACTGTGCCCTTCAGGGTATACCTGTAACCTTGCCGAA  
CAGATGTGTGAGAAACAGAACCTGCCGTGGTTTTAGAAATCCCCATGGTGATGGAAGAGGCGGAGAAATCGA  
GTGCCCTCCGTTCTACCCGTGTATTTCTCCCGAGGGGTTGAGGACAGCCCGTCCCAGCTGAGGAGAAGAG  
CTCGGTCTCTGTGACAACCAATTACCGATGTCTGACGGCACCACCTGTGCAGGAACCTGGCTGGTGGC  
TGGTTCTGTGTCCATATTTCCCTGGCAGCTGTGTGCAGGATGGCTACCACTGTTGTCCCATGGGCTACC  
ACTGTGACCCTACTTACCGGTACTGTTTGCAGCAGGGCCTGAGGTATCCTTTCACAGCCAGGAAGCAACC  
ACCTGTAGTCCCTGTGCCCTCATTGTGCGCTCAGAGGAAAGAAGTGACTTCTGGAGAGACCAATGATG  
CCTCTCAAAAACCTCAGCAACGACATGCAAGACGCTGGAGGTGTTCAAGTGTGATTCGACCTTTGTCTGCC  
CAGCGACATGACGTGTGCAAAGGTCCCCAGGGCCAGTGGAGCTGTTGTCCATTTGACTGGGCCAGTG  
TTGCGCAGATGGTCAGCACTGTGTGAATATGGATACACCTGCAGCAGCTCCTCCGTGTCTGCAAAAAG  
TCCTTCTCACAGTAG

**cDNA data:**

**From:** NCBI est: GI: 22020744

**Note:** Short poor cDNA sequence encoding part of signal and first module.

GTGCTGGTGGCCGGTGCATCCTGCTGGGGGTTGTAGCCTGTGTGCAGAGGCCCGATGGGCATCAATGC  
ACAGACAAAAGAGACTTGTGTGCAGGGGACGAAAGGCTACAACCTGTGTCCATATCCAGATGCCGTGTGTT  
GCTCTGACAAGACCCACTGCTGCCCTTCAGGTATACCTGTAACCTTGCCGAACAGATGTGTGAGAAACAG  
AACCTGCCGTGGTTTTAGAAATCCCCATGGTGATGGAAGAGGCGGAGAAATCGAGTGCCCTCCGTTCTACCCG  
TGATTTCTCCCGAGGGGTTGAGGACAGCCGCCCGCCAGCTG

**Genomic data:**

**Note:** Genomic data for coding exons is in gil409211579:9037901-9039687 Takifugu rubripes chromosome 12

From NCBI: GI: 409211579

**Note:** Progranulin coding sequences contained within the range 9037901-9039687

**Coding exon 1 Exon type: sn**

**Note:** from start codon

ATGTCGAAGTAACTCTGTGTCTGGTGGCCGGTGCATCCTGCTGGGGGTTGTAGCCTGTGTCAAATGCC  
CCGATGGGCATCAATGCACAGACAAAGAGACTTGTGTGCAGGGGACGAAAGGCTACAACCTGTGTCCATA  
TCCAGAT

**Coding exon 2 Exon type: cn**

GCCGTGTGTTGCTCTGACAAGACCCACTGCTGCCCTTCAGGGTATACCTGTAACCTTGCCGAACAGATGT  
GTGAGAAACAGAACCTGCCGTGGTTTTAGAAATCCCCATGGTGATGGAAGAGGCGGAGAAATCGAGTGCCCTC  
CGTTCTACCCGTGTATTTCTCCCGAGGGGTTGAGGACAGCCCGTCCCAGCTGAGGAGAAGAGCTCGGTG  
CTCTGTGACAACCAATTACCGATGTCTGACGGCACCACCTGTGCAGGAACCTGGCTGGTGGCTGTTCT  
GCTGTCCATATTTCCCT

**Coding exon 3 Exon type: c**

GGCAGCTGTGTGCAGGATGGCTACCACTGTTGTCCCATGGGCTACCACTGTGACCCTACTTACCGGTACT

GTTTGCAGCAGGGCCTGAGGTATCCTTTTCACAGCCAGGAAGCAACCACCTGTAGTCCCTGCTGCCCTCAT  
TGTCGCCTCAGAGGAAAAGAAGTGGACTTCTGGAG

**Coding exon 4 Exon type: n**

AGACCAATGATGCCCTCATAAAAACTCAGCAACGACATGCAAGACGCTGGAGGTGTTTCAGTGTGATTGGA  
CCTTTGTCTGCCAGCGGACATGACGTGCTGCAAAGTCCCCAGGGCCAGTGGAGCTGTTGTCCATTTCG  
ACTG

**Coding exon 5 Exon type: c**

**Note:** up to stop codon

GGCCAGTGTGTGCGCAGATGGTTCAGCACTGCTGTGAAATATGGATAACCTGCAGCAGCTCCTCCGTGTCTT  
GCAAAAAGTCCCTTCTCACAGTAG

**Genomic sequence note:** A genomic sequence is not presented (see note 2 in header).

---

00009 **T. rubripes progranulin D** Short name: **T\_rubD or fuguD** Date entered: 2014-03

**Species:** *Takifugu rubripes (Fugu rubripes) (Japanese pufferfish)*

**Taxonomy (via NCBI):** Eukaryota; Metazoa; Chordata; Craniata; Vertebrata; Euteleostomi; Actinopterygii; Neopterygii; Teleostei; Euteleostei; Neoteleostei; Acanthomorpha; Acanthopterygii; Percomorpha; Tetraodontiformes; Tetradontoidea; Tetraodontidae; Takifugu.

**General Comment:** This short unusual progranulin is apparently most evolutionarily connected with the fish progranulin A form.

**Protein Sequence**

MLSSVLFSGVLLLVLGADQCPGGRCDCVSEQEVLCPDGKRCCPEGHLCS SDGRSCKTAVVPCSDTEACP  
DNYTCKDGDGSDKWTCCLPLQAVCCPDRNYCCPAQYRCDEQSTSCIKGDSVMSWFPKLPALRMDAGLQVA  
LRDVRCEQTSCKDQGQTCRTSPTTWGCCPSFQAVCCSDMKHCCTPGYTCSEGGQCSLKRRLRWFNWGD  
EKLI\*

**Transcript:**

**Note:** Incomplete direct cDNA sequence data. Limited est sequence data available at time of entry.

**Predicted sequence:**

**Note:**

**Derivation:** NCBI: XM\_003965021.1 GI:410903176 (also JGI: Takru4|623961|lestExt\_GW.C\_3070012)  
ATGCTGTCCAGCGTGTGTTCTCAGGGGTTCTGCTGGTGCTGGTCCGGGGCAGATCAGTGCCAGGAGGAA  
GGTGTGATGCTGCAGCGAGCAGGAAGTTCTCTGCCCTGATGGAAAACGCTGCTGTCTGAAGGTCACCT  
GTGCAGCTCGGACGGACGCTCCTGCATTA AAAACAGCTGTCGTTCCATGCAGTGACACTGAGGCGTGTCCA  
GATAATTACACCTGTTGTAAGGACGGAAAGTGACAAATGGACATGTTGTCTCTACCGCAGGCTGTGTGCT  
GCCCAGATAGGAATTACTGCTGCCCCGCCAGTACAGGTGTGACGAGCAGAGCACCTCCTGCATCAAGGG  
CGATTCAGTGATGCTCTGGTTCCCAAAGCTTCTGCTGCCCTTCGCATGGACGCCGGCTCCAGGTGGCG  
CTCCGAGACGTCCGGTGTGACGAGCAGACCAGCTGCAAAGACGGCCAGACCTGCTGCAGAACATCACCCA  
CCACCTGGGGTGCTGCCCCCTCTCCACAAGCGGTGTGCTGCAGTGACATGAAGCACTGCTGTCCCACCGG  
CTACACCTGCTCGGAAGGAGGACAATGTTCCCTGAAGACCCGCCCTTCGCTGGTTCAACTGGGGCGAC  
GAGAAGCTGATCTGA

**cDNA data:**

**From:** NCBI est: GI: 25133181

**Note:** This cDNA fragment covers all but the last 9 codons and stop codon.

CACACCAGTCCGGCCCCCTATAAGATGCTGTCCAGCGTGTGTTCTCAGGGGTTCTGCCTGTGCTGGTCTG  
GGGCAGATCAGTGCCAGGAGGAAGGTGTGATGCTGCAGCGAGCAGGAAGTTCTCTGCCCTGCTGGAAA  
ACGCTGTCTGCTGAAGGTCACCTGTGCAGCTCGGACGGACGCTCCTGCATTA AAAACAGCTGTCGTTCCA  
TGCAGTGACACTGAGGTGTGTTCCAGATAATTACACCTGTTGTAAGGACGGAAAGTGACAAATGGACATGTT  
GTCTCTACCGCAGGCTGTGTGCTGCCAGATAGGAATCACTGCTGCCCCGCCAGTACAGGTGTGACGA  
GCAGAGCACCTCCTGCATCAAGGGCGATTCAAGTGTGCTGGTTCCCAAAGCTTCTGCTGCCCTTCGC  
ATGGACGCCGGCTCCAGGTGGCGCTCCGAGACGTCCGGTGTGACGAGCAGACCAGCTGCAAAGACGGCC  
AGACCTGCTGCAGAACATCACCCACCACCTGGGGTGCTGCCCCCTCTCCACAAGCGGTGTGCTGCAGTGA  
CATGAAGCACTGCTGTCCCACCGGTACACCTGCTCGGAAGGAGGACAATGTTCCCTGAAGACCCGCCG

CTTCGCTGGTT

### Genomic data:

**Note:** Genomic data for coding exons is in gil409211586:11923025-11925211 Takifugu rubripes chromosome 5  
From NCBI: GI: 409211586

**Note:** Progranulin coding sequences contained within the range 11923025-11925211

#### Coding exon 1 Exon type: sx

**Note:** From start codon. Where x encodes 14 aa containing 3 Cys.

ATGCTGTCCAGCGTGTGTTCTCAGGGGTTCTGCTGGTGTGCTCGGGGCAGATCAGTGCCCAGGAGGAA  
GGTGTGATGCTGCAGCGAGCAG

#### Coding exon 2 Exon type: c\*

**Note:** Encodes the C-half of a 10 Cys module.

GAAGTTCTCTGCCCTGATGAAAAACGCTGCTGTCTGAAAGTACCTGTGCAGCTCGGACGGACGCTCCT  
GCATTAACACAG

#### Coding exon 3 Exon type: n

CTGTGTTCCATGCAGTGACACTGAGGCGTGTCCAGATAATTACACCTGTTGTAAGGACGGAAGTGACAA  
ATGGACATGTTGTCTCTACCGCAG

#### Coding exon 4 Exon type: cn

GCTGTGTGCTGCCAGATAGGAATTACTGCTGCCCCGCCAGTACAGGTGTGACGAGCAGAGCACCTCCT  
GCATCAAGGGCGATTTCAGTGATGCTCTGGTTCCCAAAGCTTCTGCTGCCCTTCGCAATGGACGCCGGCC  
CCAGTGGCGTCCGAGACGTCCGGTGTGACGAGCAGACCAGCTGCAAAGACGGCCAGACCTGCTGCAGA  
ACATACCCACCACCTGGGGCTGTGCCCTCTCCACAA

#### Coding exon 5 Exon type: c

**Note:** up to stop codon

GCGGTGTGCTGCAGTGACATGAAGCACTGCTGTCCCACCGGCTACACCTGCTCGGAAGGAGGACAATGTT  
CCCTGAAGACCCGCCCTTCGCTGGTTCAACTGGGGCGACGAGAAGCTGATCTGA

**Genomic sequence note:** A genomic sequence is not presented (see note 2 in header).

---

00006 **X. tropicalis progranulin** Short name: **X\_tro or frogXt** Date entered: 2014-03

**Species:** *Xenopus tropicalis* (western clawed frog)

**Taxonomy (via NCBI):** Eukaryota; Metazoa; Chordata; Craniata; Vertebrata; Euteleostomi; Amphibia; Batrachia; Anura; Mesobatrachia; Pipioidea; Pipidae; Xenopodinae; Xenopus; Silurana.

**General Comment:** Good cDNA and genomic data. But there are discrepancies within the middle repetitive section. Additional genomic sequence is provided here which is consistent with the EST contig and shows evidence of this middle repeat.

### Protein Sequence

MGPPWFLLLVVSTVVSATLCPDGSTCGEKSLLCELPKKGYGCCPAAEVVSRSLPMILSQTSCSGCPDEYS  
CVNTPEGGTACCPLESEGKSCQDGHHCSSVGSYCSDDGHYCIIPASNQSAVVCPDGRSECPILTTCMMMSDM  
SSWGCCPMPQAVCCDDMHCCPHNSECDVQQGRCISNQDHIIPWMSKLPARVKSEGLKLVGLGDEERRVPC  
LDGTFPCPDGSTCCEQVDHTYGCCSILSAVCCSDHLHCCPGGTTCDLVHKKCVSQTGEGPLLPQMPAIREE  
SANQVPCDATTSCPDKNTCCHLSSEKWGCCPYAQAVCCDDHIHCCPSGFTCSGGSCVLAEHSIPWMRKTL  
AQGLKTRVQDDTASCPEKETCCRLVSGKWGCCPVVKAVCCNDHLHCCPEGYTCSQGECSKMEHSIPWF  
TKTPALTHEARDVECDMYSCPDGQTCRLASGDWGCCP IAQAVCCDDHEHCCPPGYTCSGGSCQKGEELS  
IPWFLKTPALKQKARDVQDDMYSCADGQTCRLASGDWGCCP IAQAVCCDDHEHCCPPGYTCSGGSCQQ  
GVLSIPWFLKTPALKQNARDVQDDMYSCADGQTCRLASGDWGCCP IAQAVCCDDHEHCCPPGYTCSGG  
QQQKGEHSIPLFSKTPALKQKARDVQDEIYSCPDGQTCRLASGDWGCCP IARAVCCDDHEHCCPHGYI  
CSGGSCQQGEELSIPWFLKTPALKQKARDVQDDMYSCPDGQTCRLASGDWGCCP IAQAVCCDDHEHCCP  
PGYTCSGGCQKGEHSIPLFSKTPALRQETKYVKCDDTHSCADGQTCRLASGDWGCCP IAQAVCCDDHE  
HCCPPGYTCSGSCMIGEHSIPWFLKTPALKQKAKDVQDDMYSCADGQTCRLASGDWGCCP IAQAVCC  
DDHEHCCPPGYTCSGGCQKGEHSIPWYSKTPALKQEGNIVKDDSFACKDGYTCCRMVSGVWGCCP IEK  
AVCCSDHWHCCPQGF TCDARGTCVLGQF SIPWLTVPALPFDGTHSICDDTHTCPSGTTCPPGEGGGWRC  
CPVEEKEAIE TSPSDTSVQGLRLDYVWCDSQYACFDGQTCRGLGGVWVWCCVYTQGVCCPDMVHCCPYGY  
VCLNHGTSCSRSGSPRWGQSGSPHWDGKQSPRDGKRPPFL\*

**Transcript:**

**Note:** This database entry and our earlier assembly from EST data are in agreement.

The cDNA data define the transcript well (below), so no predicted sequence is required.

**cDNA data:**

**From:** NCBI: NM\_001078701.1 GI:118403711

**Note:** cDNA sequence data:

GGCGGGAGTAATATTCCAAAGGGTTCGAGCGGCGTCTCTGTTTTAATGGCCGGGGCCTATTCAGTTAGTGG  
CGCAATTTAGTAGCTTGATGTATATTTATGGGTGCATATGGCAGCTTTCTGCCTGGATTTGATATCCC  
AGCCCGGTGCCACCCCATCTATCAAAGTACCACAGCTCCTGTGTAGTTTATGTTCCCAGGTGCTGAGCTA  
TTTTTCTCAGTCATAGTTGTGTGAACACAAAAGGGTGGAAAGCAATCTGGTATAAAAAATTTTTTACACAT  
TCTGAAACAAAAGTCTCAGCAGACTCTGATTTTGGAGTGAGCGGGGTAAGTGGGCGGAGCGCAGCGCATA  
AACCGAGGTCAATTGCTGGGAAGCTGTACATGCACAGACTGGGCAGGATGGGTCCACCTTGGTTTTCTT  
CTGCTTGTGGTCTCCACTGTTAGTGCCACACTCTGCCCAGATGGCAGCACTTGTGGAGAAAAGAGTCTGT  
GCTGTGAACTGCCGCAAGAAAGGGGTATGGCTGTTGCCCTGCGGCAGAGGTTGTGTCTCGTCCCTTCC  
TATGATTTCTTTCCAGACCTCCTGCTCAGGCTGCCCTGATGAGTATTCCTGTGTGAATACTCCAGAAGGG  
GAAACCGCTTGTCTCCATTATCTGAGGGAAAACTTGGCAAGATGGACATCACTGCTGTTCTGTAGGCT  
GCTACTGCTCAGATGATGGCCACTACTGTATCCCAGCCTCTAACCACTGCTGCTGTAGTCTGCCCGGATGG  
AAGGTCTGAATGCCCCACTCTACCACCTGCTGTATGATGTCTGACATGTCTGTCATGGGGGTGCTGCC  
ATGCCACAGGCAGTTTGTCTGTGATGATCATATGCACTGTCTCCCATAACTCTGAGTGTGATGTCCAGC  
AAGGGCGCTGTATCTCCAACAGGACCACATTCCTGGATGAGCAAACCTCCAGCCCGTGTGAAATCAGA  
GGGCTTGAATTTAGTTGGCTTGGGAGATGAAGAAGCAGCGGTTCCATGCCCTTGATGGCACTTTCTGCCCA  
GATGGCTCTACCTGCTGTGAACAAGTAGACCACACATATGGGTGCTGCTCCATATTTGCTGTCTGTCTGCT  
GTTCTGACCATCTTCACTGTTGCCCTGGTGGTACCACATGTGACCTTGTCCATAAGAAATGTGTATCCCA  
AACTGGGGAGGGCCCCCTTATTGCCACAGATGCCAGCTATCCGGGAGGAATCAGCCAACCAAGGTCCCCTGC  
GATGCCACCACCTAGCTGCCCGGATAAGAACACCTGCTGCCACCTGTCTCATCTGAGAAAGTGGGGTTGCTGCC  
CTTATGCACAGGCAGTGTGTTGTGACGATCATATCCACTGCTGTCCCAGTGGGTTTACATGTTCTGGAGG  
CAGCTGTGTGTTGGCAGAGCACTCTATCCCTTGGATGAGGAAGACTTTGGCTCAGGGGCTGAAAACTACC  
AGAGTTTCACTGTGATGACACCGCCAGCTGCCCAGAAAAGGAAACCTGCTGTCTGCTGTTATCTGGCAAGT  
GGGGTTGCTGTCTGTAGTGAAGGCTGTGTGCTGTAATGATCATCTTCATTGCTGTCTGAAAGTTATAC  
ATGCTCCCAGGGCGAATGTCTAAAAATGGAACACTCCATCCCTTGGTTTACAAAAACTCCAGCTCTGACC  
CATGAAGCCAGAGATGTGCAATGTGATGATATGTACAGCTGCCCAGATGGACAAAACCTGCTGCCGCTTGG  
CCTCAGGCGACTGGGGATGCTGCCCAATAGCACAGGCTGTGTGCTGTGATGACCATGAACACTGCTGCC  
TCCTGGTTACACATGTTCTGGAGGAAGTTGCCAGAAGGGGGAGCTCTCTATCCCATGGTTCCCTCAAGACT  
CCAGCTTTGAAACAGAAGGCCAGAGATGTCCAGTGTGATGATATGTACAGCTGCGCAGATGGGGCAAACCT  
GCTGCCGCTGGCATCTGGGGACTGGGGATGCTGCCCTATAGCACAGGCTGTGTGCTGTGATGACCATGA  
ACACTGCTGCCCTCCTGGATACACATGCTCTGGAGGAAGTTGCCAGCAGGGGGTGTCTTCAATCCCATGG  
TTCTCAAGACTCCAGCTTTGAAACAGAATGCCAGAGATGTCCAGTGTGATGATATGTATAGCTGCGCAG  
ATGGGCAAACCTGCTGCCGCTGGCATCTGGGGACTGGGGATGCTGCCCTATTGCACAGGCTGTGTGCTG  
TGATGACCATGAGCACTGCTGCCCTCCTGGTTACACATGCTCCGGAGGACAGTGCCAGAAGGGGGAGCAC  
TCCATCCCATTGTTTCAAGACTCCAGCTTTGAAACAGAAGGCCAGAGATGTCCAGTGTGATGAAATTT  
ACAGCTGCCCAGATGGGGCAAACCTGCTGCCGCTTGGCCTCTGGCGACTGGGGATGCTGCCCAATAGCACG  
GGCTGTGTGCTGTGATGACCATGAACACTGCTGCCCTCATGGATACATATGCTCTGGAGGAAGTTGCCAG  
CAGGGGGAGCTCTCTATCCCATGGTTCCCTCAAGACTCCAGCTTTGAAACAGAAGGCCAGAGATGTCCAGT  
GTGATGATATGTACAGTTGCCCAGATGGACAAAACCTGCTGCCGCTTGGCCTCTGGTGACTGGGGATGCTG  
CCCAATAGCACAGGCTGTGTGCTGTGATGACCATGAACACTGCTGCCCTCCTGGTTACACCTGCTCTGGA  
GGACAGTGCCAGAAGGGGGAGCACTCCATCCCATTGTTTCAAGACTCCAGCTCTGAGACAGGAGACCA  
AATATGTCAAATGTGATGATACCCACAGCTGTGCAGATGGGGCAAACCTGCTGCCGCTGGCATCTGGGGGA  
CTGGGGATGCTGCCCTATAGCACAGGCTGTGTGCTGTGATGACCATGAACACTGCTGCCCTTGGATAT  
ACCTGCTCTGGGTACAGTGCATGATTGGGGAGCACTCCATCCCATTGTTTCAAGCAAGACCCCGGCTTTAA  
AACAGAAGGCCAAAGATGTCCAGTGTGATGATATGTACAGCTGCGCAGATGGGGCAAACCTGCTGCCGCTT  
GGCATCTGGGGACTGGGGATGCTGCCCTATAGCACAGGCTGTGTGTTGTGATGACCATGAACACTGCTGC  
CCTCCTGGTTACACATGCTCTGGAGGACAATGCCAGAAGGGAGAGCACTCCATCCCATGGTACAGCAAGA  
CTCCAGCTCTGAAGCAAGAAGGTAACATAGTGAATGTGATGATTCTTCGCTGTAAAGATGGTTACAC  
TTGTTGTGCGATGGTCTCTGGGGTGTGGGGATGCTGCCCTATAGAGAAGGCTGTGTGCTGCTCCGACCAC  
TGGCACTGCTGCCCCAGGGGTTTACCTGTGATGCCAGAGGTACCTGTGTAAGGCAAGTTCTCTATCC  
CATGGCTCACTAAGGTTCCAGCTTTGCCCTTTGATGGGACTCACAGTATTTGTGACGATACCCACACTTG  
CCCTTCTGGTACCACATGCTGCCCTGGAGAGGGGGAGGCTGGAGATGCTGCCCAGTGGAAAGAGAAGGAG  
GCTATCGAAACCTCCCCAGTGACACCTCTGTCCAGGGATTACGTCTGGATTATGTCTGGTGTGATTCTC

AGTATGCCTGCTTTGATGGCCAAACTTGTGTCGAGGACTCGGAGGAGTGTGGAAGTCTGTGTTTATAC  
TCAGGGGGTGTGCTGCCAGACATGGTGCAGTCTGTCCCTATGGGTATGTGTCTGAACCATGGAACG  
TCATGTAGTCGTTACAGGAAGCCACGTTGGGATGGTCAGTCGGGAAGCCACATTGGGATGAAAAACAGT  
CCCCACGGGATGGTAAACGGCCCCCTTTCCTATGAACACAATCCAAATCCACTTGATTGTTACTACTAAT  
AAGATCCTTCTAAAAGCACTGGAATAAAAATCAAATTATTTTTGTTTTATATGTTTAAAAAAAAAAAAAAAA

**Genomic data:**

**Note:** Genomic data (exons). The exons are derived from two genomic sequences. The first should cover the whole gene, since it has exons encoding the first paraganulin and five modules and the last five and a half modules including the second paraganulin. But it misses exons necessary for the four repeat modules in the centre of the assembled transcript. The second is a shorter contig which has these missing exons along with two upstream and six downstream exons. Exons are numbered according to expectations from the cDNA sequence.

From NCBI: AAMC02035398.1 GI: 428718064

**Note:** An error in assembly of AAMC02035398.1 has joined high-identity sequences at the end of coding exon 12 and between coding exons 20 and 21, thus omitting 8 exons encoding 4 highly similar modules.

**Coding exon 1 Exon type: sn**

**Note:** from start codon

ATGGGTCCACCTTGGTTTCTTCTGCTTGTGGTCTCCACTGTTAGCGCCACACTATGCCAGATGGCAGCA  
CTTGTGGAGAAAAGAGTCTGTGCTGTGAACTGCCTGGCAAGAAGGGGTATGGCTGTTGCCCTGCGGCAGA  
G

**Coding exon 2 Exon type: n\***

**Note:** \* Encodes the N-half of a 10 cys module

GTTGTGTCTCGCTCCCTTCCATGATTCTTTCCAGACCTCCTGCTCAGGCTGCCCTGATGAGTATTCCT  
GTGTGAATACTCCAGAAGGGGGAACCGCTTGTGCTCCATTAGCTGAG

**Coding exon 3 Exon type: c\***

**Note:** \* Encodes the C-half of a 10 cys module

GAAAAATCTTGCCAAGATGGACATCACTGCTGTTCTGTAGGCTCCTACTGCTCAGATGATGGCCACTACT  
GTATCCAG

**Coding exon 4 Exon type: n**

CCTCTAACCAGTCTGCTGTAGTCTGCCGGATGGAAGGTCTGAATGCCCCACTCTCACCACCTGCTGTAT  
GATGCTGCACATGTCGTCATGGGGTGTGCCCCATGCCACAG

**Coding exon 5 Exon type: c**

GCAGTTTGTGTGATGATCATATGCACTGCTGTCCCCATAACTCTGAGTGTGATGTCCAGCAAGGGCGCT  
GTATCTCCAACCAGGACCACATTCCTGGATGAGCAAACCTCCAGCCCGTGTGAAATCAGAGGGCTTGAA  
ATTAGTTGGCTTGG

**Coding exon 6 Exon type: n**

GAGATGAAGAACGACGGGTTCATGCCTTGATGGCACTTTCTGCCAGATGGCTCTACCTGCTGTGAACA  
AGTAGACCACACATATGGGTGCTGCTCCATATTGTCT

**Coding exon 7 Exon type: c**

GCTGTCTGCTGTTCTGACCATCTTCACTGTTGCCCTGGTGGTACCACATGTGACCTTGTCCATAAGAAAT  
GTGTATCCCAAACCTGGGAGGGCCCCCTTATTGCCACAGATGCCAGCTATCCGGGAGGAAT

**Coding exon 8 Exon type: n**

CAGCCAACCAGGTCCCTTGCGATGCCACCACTAGCTGCCCGGATAAGAACACCTGCTGCCACCTGTTCATC  
TGAGAAGTGGGGTTGCTGCCCTTATGCACAG

**Coding exon 9 Exon type: c**

GCAGTGTGTTGTGACGATCATATCCACTGCTGTCCAGTGGGTTACATGTTCTGGAGGCAGCTGTGTGT  
TGGCAGAGCACTCTATCCCTTGGATGAGGAAGACTTTGGCTCAGGGGCTGAAAA

**Coding exon 10 Exon type: n**

CTACCAGAGTTCAGTGTGATGACACCGCCAGCTGCCAGAAAAGGAAACCTGCTGCTCGTCTGGTATCTGG  
CAAGTGGGGTTGCTGCTCCTGTAGTGAAG

**Coding exon 11 Exon type: c**

GCTGTGTGCTGTAATGATCATCTTCATTGCTGTCTGAAAGTTATACATGCTCCCAGGGCGAATGCTCAA  
AAATGGAACTCCATCCCTTGGTTCACAAAACTCCAGCTCTGACCCATGAAG

**Coding exon 12 Exon type: n**

**Note:** The end of this exon is approximately where duplications of about 450 to 600 bases resulted in the repeat of 4 nearly identical modules in the middle of the progranulin. It is where the wrong downstream sequence was incorporated by the sequence assembly process.

CCAGAGATGTCGAATGTGATGATATGTACAGTTGCCAGATGGACAAACCTGCTGCCGCTTGGCCTCTGG  
TGA CTGGGGATGCTGCCAATAGCACAG

**Coding exon 21 Exon type: c**

**Note:** This exon wrongly assembled to follow exon 12 in AAMC02035398.1. The intervening exons are presented in the companion genomic DNA contig in this entry.

GCTGTGTGCTGTGATGACCATGAACACTGCTGCCCTCCTGGTTACACCTGCTCTGGAGGACAGTGCCAGA  
AGGGGGAGCACTCCATCCCATTGTTTCAGCAAGACTCCAGCTCTGAGACAGGAGA

**Coding exon 22 Exon type: n**

CCAAATATGTCAAATGTGATGATACCCACAGCTGTGCAGATGGGCAAACCTGCTGCCGCTTGGCATCTGG  
GGACTGGGGATGCTGCCCTATAGCACAG

**Coding exon 23 Exon type: c**

GCTGTGTGCTGTGATGACCATGAACACTGCTGCCCCCTGGATATACCTGCTCTGGGTACAGTGCAATGA  
TTGGGGAGCACTCCATCCCATTGTTTCAGCAAGACCCCGCTTTAAACAGAAGG

**Coding exon 24 Exon type: n**

CCAAAGATGTCCAGTGTGATGATATGTACAGCTGCGCAGATGGGCAAACCTGCTGCCGCTTGGCATCTGG  
GGACTGGGGATGCTGCCCTATAGCACAG

**Coding exon 25 Exon type: c**

GCTGTGTGTTGTGATGACCATGAACACTGCTGCCCTCCTGGTTACACATGCTCTGGAGGACAATGCCAGA  
AGGGAGAGCACTCCATCCCATTGTTTCAGCAAGACTCCAGCTCTGAAGCAAGAAG

**Coding exon 26 Exon type: n**

GTAACATAGTAAATGTGATGATTCCTTCGCTGTAAAGATGGTTACACTTGTGTCGATGGTCTCTGG  
GGTGTGGGGATGCTGCCCTATAGAGAAG

**Coding exon 27 Exon type: cn**

GCTGTGTGCTGCTCCGACCACTGGCACTGCTGCCCCAGGGGTTTACCTGTGATGCCAGAGGTACCTGTG  
TACTAGGCCAGTTCTCTATCCCATGGCTCACTAAGGTTCCAGCTTTGCCCTTTGATGGGACTCACAGTAT  
TTGTGACGATACCCACACTTGCCCTTCTGGTACCACATGCTGCCCTGGAGAGGGGGGAGGCTGGAGATGC  
TGCCCACTGGAAGAG

**Coding exon 28 Exon type: n**

AAGGAGGCTATCGAAACCTCCCCAGTGACACCTCTGTCCAGGGATTACGTCTGGATTATGTCTGGTGTG  
ATTCTCAGTATGCCTGCTTTGATGGCCAACTTGTGTCGAGGACTCGGAGGAGTGTGGAACCTGCTGTGT  
TTATACTCAG

**Coding exon 29 Exon type: c**

**Note:** up to the stop codon (3'ut continues in the exon)

GGGGTGTGCTGCCAGACATGGTGCCTGCTGTCCCTATGGGTATGTGTGCTGAACCATGGAACGTCAT  
GTAGTCGGTTCAGGAAGCCACGTTGGGATGGTTCAGTCCGGAAGCCACATTGGGATGGAAAACAGTCCCC  
ACGGGATGGTAAACGGCCCCCTTTCCTATGA

From NCBI Trace Archive: TI in (443961751, 422295050, 450798742, 240880237, 479158468, 415700498, 416062972, 248893834, 391890786, 243494173, 418516449, 389713143, 242525690, 408119643, 391766295, 242742823, 414002177, 412560105, 414225439, 419262832, 423416245, 584721614, 389645324, 422621756, 241665798, 249207218, 415658536, 413407419, 391890402, 389681264, 242821231, 243494269, 569866661, 430948189, 475372848, 421849771, 413358776, 552245266, 418310929, 451013482, 242525306, 417339606, 415700879, 389785261, 418505765, 391397092, 416626534, 242742439, 431156322, 241665421, 412007748, 435260900)

**Note:** A contig assembled from these Trace archive sequences (via Cap3, including quality)



**Coding exon 11 Exon type: c**

GCTGTGTGCTGTAATGATCATCTTCATTGCTGTCTGAAAGTTATACATGCTCCCAGGGCGAATGCTCAA  
AAATGGAACACTCCATCCCTTGGTTCACAAAACTCCAGCTCTGACCCATGAAG

**Coding exon 12 Exon type: n**

CCAGAGATGTCGAATGTGATGATATGTACAGTTGCCAGATGGACAAACCTGCTGCCGCTTGGCCTCTGG  
TGA CTGGGGATGCTGCCAATAGCACAG

**Coding exon 13 Exon type: c**

GCTGTGTGCTGTGATGACCATGAACACTGCTGCCCTCCTGGTTACACATGTTCTGGAGGAAGTTGCCAGA  
AGGGGGAGCTCTCTATCCCATGGTTCCTCAAGACTCCAGCTTTGAAACAGAAGG

**Coding exon 14 Exon type: n**

CCAGAGATGTCCAGTGTGATGATATGTACAGCTGCGCAGATGGGCAAACCTGCTGCCGCTTGGCATCTGG  
GGACTGGGGATGCTGCCCTATAGCACAG

**Coding exon 15 Exon type: c**

GCTGTGTGCTGTGATGACCATGAACACTGCTGCCCTCCTGGATACACATGCTCTGGAGGAAGTTGCCAGC  
AGGGGGTGCTTTCATCCCATGGTTCCTCAAGACTCCAGCTTTGAAACAGAATG

**Coding exon 16 Exon type: n**

CCAGAGATGTCCAGTGTGATGATATGTATAGCTGCGCAGATGGGCAAACCTGCTGCCGCTTGGCATCTGG  
GGACTGGGGATGCTGCCCTATAGCACAG

**Coding exon 17 Exon type: c**

GCTGTGTGCTGTGATGACCATGAGCACTGCTGCCCTCCTGGTTACACATGCTCCGGAGGACAGTGCCAGA  
AGGGGGAGCACTCCATCCCATTGTTTTCAGCAAGACTCCAGCTTTGAAACAGAAGG

**Coding exon 18 Exon type: n**

CCAGAGATGTCCAGTGTGATGAAATTTACAGCTGCCAGATGGGCAAACCTGCTGCCGCTTGGCCTCTGG  
CGACTGGGGATGCTGCCAATAGCACGG

**Coding exon 19 Exon type: c**

GCTGTGTGCTGTGATGACCATGAACACTGCTGCCCTCATGGATACATATGCTCTGGAGGAAGTTGCCAGC  
AGGGGGAGCTCTCTATCCCATGGTTCCTCAAGACTCCAGCTTTGAAACAGAAGG

**Coding exon 20 Exon type: n**

CCAGAGATGTCCAGTGTGATGATATGTACAGTTGCCAGATGGACAAACCTGCTGCCGCTTGGCCTCTGG  
TGA CTGGGGATGCTGCCAATAGCACAG

**Coding exon 21 Exon type: c**

GCTGTGTGCTGTGATGACCATGAACACTGCTGCCCTCCTGGTTACACCTGCTCTGGAGGACAGTGCCAGA  
AGGGGGAGCACTCCATCCCATTGTTTTCAGCAAGACTCCAGCTCTGAGACAGGAGA

**Coding exon 22 Exon type: n**

CCAAATATGTCAAATGTGATGATACCCACAGCTGTGCAGATGGGCAAACCTGCTGCCGCTTGGCATCTGG  
GGACTGGGGATGCTGCCCTATAGCACAG

**Coding exon 23 Exon type: c**

GCTGTGTGCTGTGATGACCATGAACACTGCTGCCCCCTGGATATACCTGCTCTGGGTCACAGTGATGA  
TTGGGGAGCACTCCATCCCATGGTTCAGCAAGACCCCGCTTTAAAACAGAAGG

**Coding exon 24 Exon type: n**

CCAAAGATGTCCAGTGTGATGATATGTACAGCTGCGCAGATGGGCAAACCTGCTGCCGCTTGGCATCTGG  
GGACTGGGGATGCTGCCCTATAGCACAG

**Coding exon 25 Exon type: c**

GCTGTGTGTTGTGATGACCATGAACACTGCTGCCCTCCTGGTTACACATGCTCTGGAGGACAATGCCAGA  
AGGGAGAGCACTCCATCCCATGGTACAGCAAGACTCCAGCTCTGAAGCAAGAAG

**Coding exon 26 Exon type: n**

GTAACATAGTAAATGTGATGATTCCCTTCGCTGTAAAGATGGTTACACTTGTGTCGCATGGTCTCTGG

GGTGTGGGGATGCTGCCCTATAGAGAAG

**Genomic sequence note:** This genomic sequence was obtained by splitting the portion of AAMC02035398.1 which contains progranulin coding exons and assembling it with the trace wgs contig specified in this entry to provide the sequence containing all predicted exons.

TGCTTTGTGTACAAGGTTTTTAACACTTTGCTGTCTGATTATTTTTCCCCCCTCAGGATGGGTCCACCTT  
GGTTTCCTCTGCTTGTGGTCTCCACTGTTAGCGCCACACTATGCCAGATGGCAGCACTTGTGGAGAAAA  
GAGTCTGTGCTGTGAACTGCCCTGGCAAGAAGGGGTATGGCTGTTGCCCTGCGGCAGAGGTAGGTAGAGGG  
AAGCATGGGGGCTGCACAACCTGCCACATAGAGTAGAAGATCTAGATAAAATACCCTCAGCTGTGGGTTTTT  
CAACATTAGGACATTATGGTGCCTAGAATGATTTATGGTGTCTGTTGAACCAAACAAAAGTGCTACAAT  
GACCTTTCTCCTTTTAGGTTGTGTCTCGCTCCCTTCCATGATTCTTTCCAGACCTCCTGCTCAGGCT  
GCCCTGATGAGTATTCCTGTGTGAATACTCCAGAAGGGGGAACCGCTTGCTGTCCATTAGCTGAGGTAAG  
CATTGGTCAATTGAATAAGGACCCTAGTGATACAGGAACTTATTTGACAGTGACCACAGCTAAAGGAAGA  
GACTCTGTTTTGGGAGTCTTGCTTTCAATAAGACTGGTTCATGGGGCAAGTTTTTCAGAAAGCCTTCATATA  
GTAGGGCTTTTTCTCTGGGCACAAAGGGGGTTCCTTAAAATTCGTTTTAAAGGCTGCTGTATCCTTATAC  
AGTGGCATGCTTGGTGGTGTTCGGTGTCTGGTGCATGAAACCTCTCGGTTTGGCTCTCAAAGGAGTG  
TACTGGTTCAGACTCCAGTTTATTGCTCTATCGTGACATCAATTGAGATGTTAGGCCAGAGGTGGCCTT  
GGGCTTTGCCATCAATATGCCCCCTGCCCTTCTTTTTTTTTTTTTTTTGTGGAATGGGTGACTGGCACCC  
TATCTTGAGACCGGCACCCATCCGGTGACAAGTATAAAAATATATGGTTAGGTTAACTTTTCAGGAAGCA  
GCAAGTCTTAACTTTCTGTAAATGACTTTTTGTTTTGTGATTTCTTGCAAACTTAGGGAAAACTTGCC  
AAGATGGACATCACTGCTGTTCTGTAGGCTCCTACTGCTCAGATGATGGCCACTACTGTATCCCAGGTTA  
GAGATCTCATCTGCTATAACTTCCCCCTCCATCTTGATAAATTTCTACTTAAACATTGTGTTTTGTTTT  
TGTTTTTTTTTACAGCCTCTAACCAGTCTGCTGTAGTCTGCCCGGATGGAAGGTCTGAATGCCCACTCT  
CACCACCTGCTGTATGATGCTGACATGTCGTCATGGGGGTGCTGCCCATGCCACAGGTAAGAGGACCC  
AGTTCCTATGCCCTACTGTTTTAAATTCCCATACTACAGACCTTGACAAAAAAAATCCGCTCCCAATAA  
CCTCTAACTGCCAAATACTGGGAGATGTAGTAAAGCTTAAAGGGTTCAGGTTGTACATGTAAGTTCAGG  
CTTGAACGGCCGCAACCGCCCCCACCCCAAGTCTTCAAGGCAAGGGGGGGGGGGGCAAGGGTCT  
CTCCATCCACCTTTCCCTAATCACCTTTCCCTAATCTGCAGCTGCCAACATGATATATTTATGAAGAGTT  
CACAGGGGGTACGTTGAGTGTCTTTTATTATTTATTTGATTATTGAAACTTGGCAGTAGCTGCTGCAT  
TCCCACCCTAGGCTTATACTCGAGTCAATAAGTTTTTCCAGTTTTCTTGGGTAAAATTAGGTACCTCGG  
CTTATATTCGGATCGGTTTATACTCGAGTATATACGGTAACTTGAATGAATAGATTTTTCCCATGACT  
CCTTAACTGACCAGAAAGCCACATGGATCTTGTGTGCCAGGGTTAATGTTCTCTCTGCTGACCATTCT  
TGCAGGCAGTTTGTGTGATGATCATAATGCACTGCTGTCCCATAACTCTGAGTGTGATGTCCAGCAAGG  
GCGCTGTATCTCAACCAGGACCACATTCCTGGATGAGCAAACCTCCAGCCCGTGTGAAATCAGAGGGC  
TTGAAATTAGTTGGCTTGGGTAAGCTTACCAACTTGTTACAACCTACCAACTTTTTATTCTGTGGGGCCAA  
GGTTTTCATAACTTCTTCTTGACAACCTGGACTGACATAGATAATCTGCTTAAAATATGCTATTTATTTAA  
AATTTAATATCATAGTACATTTAAGGCTTATGCGTTTGGTGCCTATACTGGGCACTTAAATCATAGGCCA  
AGGATATAGGTATAGACCTCATAGTCAAGGTCACCTTTTTATTTTAGAGAAGCTTTCATTAAAGGAGAAG  
GAAAGGCTAATAAAGAGTTAATCTCAAGCTGCATGCATACCTTCAGTTCCTCAATAGTGCCTTAAAGTC  
TCCCATAATTTCTCCATTCAGATGATCAGAAGCTCATAGGAAAAAAAATACTCTGAGCTGTGTAAG  
AAATGCCCTGCTCCTGCACCAAGACCAAGACTGGTGTACATGCTCAGTGTGTAAGACTATATGATAAAGC  
TTCTGTGATTGGCTCAGATCACACATTCCTAAGGGGGGGAGGGAGTTCTTGGCATTCTTGAGGGAGGG  
GGGGAGCAGGAGAGAGGAGAGAGCTGCGTGTCTTGGCAGAGGAAAACAAACAGACAATAAATCCTGTAT  
CTTTTGAAGAGAACTCCAGTGCAGCGTTTCTGTGTGTGCTTATGGCTGTATTTACATAGGCCCTTCTGA  
TAAAGCTTACTAAAGGTCCCCATACACGGGCGGATTATAGCTGCCGATATCGGTCCCTTGGACCGATTCTG  
GCAGCTTATCGGCTCGTGTAGGGGCGAACCAGGGGCTGGCCGACCGATATCTGGCTGAAATGGGGC  
AGATATCGATCGGCCAGGTTAGAAAATCCAGTCCGATCGGGGACCGCATGGGCTCGTGCATGCGGTCCCC  
GAACCGACTGCCCCATTGCCACGTGTAGAATTCGATCCTTTGGCCCCAGGGCCAAACTATCGAATTCGCC  
TACATGCCCTCCCCGATATCGCCACCCGTAGGTGGGGCTATCGGGTGAAGATCGCCAAGCGAGCGGATCT  
GGCCGTGTATGGCCAGCTTTAGTTTTTACCTTTCTTCTCTTTTAAAATATAAGGAATAAGGGGCGAATTG  
GAACTTAGTGTACTCAGCAGTACTGCTATTTTATTTCTTTCTGGCATGTAGGAGATGAAGAACGACG  
GGTTCATGCCCTTGATGGCACTTTCTGCCAGATGGCTCTACCTGCTGTGAACAAGTAGACCACACATAT  
GGGTGCTGCTCCATATTGTCTGTAAGTGTTCCTCATTGCTTTATTAATATGTGCATAGAAACCTTTTCC  
TCTGGTTAGTCCATAAGTACACTTTGCAATGCAATTAAGGGGAAGTTCACCTTTTAGTATGTCATAGATG  
ACTTTATCTAAGTACTTTAGAAATGTATACCCCTTTAAAAGAAAAATATATCATGGTTTAAGCCCTGGG  
CTGCCGACTACCTGTGTCTTTTTGGCTTTTTAAATCTGATTATCTAGTGTAAAGGGTTCAGGACCACAACA  
GATGAAAATCTGCACAAATGCACAAATCTTTTCAGAAATGTATGTAATTCCTGGAAAGCGTGATTTTTT  
GTCATTACTGCTTGTATTTAAATTAAGGCAAGGAGTACAGCCCTTCTCGCTGGCTTTGTGTGGTCTAGT  
AACCCAGCAGTACAAAGTACCAAAATCTAGGAAATGCTCGTCAATCAGCCACATAGTTCTCAATGAGAAC  
ATGTTGCCACAATCCTGTAACCTCAAAGCAAACCAATCGGATGTTTGATTTCATGTGGTTATCTGGGCTGC

TATGGGCTACTGCACCAAGGCCAACATTTCTTGTAAATGCTACATAACTCCCACAGTGGTAGCCCTTCATT  
TCAGGTTAACTGCACTTTTACCTGATTGATGGTCATGGTATGTTTTCTTTTAGGCTGTCTGCTGTTCTGAC  
CATCTTCACTGTTGCCCTGGTGGTACCACATGTGACCTTGTCCATAAGAAAATGTGTATCCCAAACCTGGGG  
AGGGCCCTTATTGCCACAGATGCCAGCTATCCGGGAGGAATGTAAGTCCGTGTGGGGTTTAAATTGCCCA  
GTTTACGGCGCTTTAACTGAATTTCTTTAGTACTTTGCATGCACTTGTGGCAGGGGAAGAAAAGGTAGGG  
GAAGAGGCACACAGGGGTTAAGATCTGTAGATTGAAAATCCATATAGGCCAATGAGAGAAAACCACTGTTT  
TAATTCCTAAAACCTGTGGCAGAAATGGGCAATACCCAGATGTTTTGCTATTAACCTGTAACCATGTTACAAGC  
TTAGGGGACCTCCACCAAAGATGCCAAAGATGGACCTCCATGGGAGGGGAGGGCTTGAAATTTAAACCTT  
TGACAACCTATTGGATTAATGGAATTTAAAATGCAAGATGTTTTGCCCTGCAAGGCATTGAGGCAAAGTAATT  
TTGTTTTGTGGGAGTGTGGCACCTTGGGTACCTGTGGTTTTGGGTGTGGCAGAGCATTCCGATCTACTGTAA  
ATTTAGCACCCTTCTTCTTCTTCTCAGCTGCTGCAACCTGCAATTACATGGCAGATATCTCTGTATG  
TACCATGACTGTCCAGAACAAATTTGGACTACACAGGGAAAATAGCGTGGTTAGCTTTGATAGATCATGTAT  
ATGGCCAAAATAGCAGGATTTAATATTATGAGAGCTGACTCTTAAAGTGGTGTAAATGGTTACAACGCTATAA  
AGATAGTAGCTTGTCTCCTTGGGAGTGTAGAAGAAAATGTAGTGCCTTCATGGATGAATTGTCTCCGT  
CTCAGCAGCCAACCAGGTCCTTGCATGCCACCACTAGCTGCCCGGATAAGAACACCTGCTGCCACCTG  
TCATCTGAGAAAGTGGGGTTGCTGCCCTTATGCACAGGTATAAACTAATGAAAGTCTGCTGGTTCTTACGGC  
TTAATAGTGTGAACATTCAGAGCTACAATACTGAGACATGTTCAATCTCCTGTCCCCACTTAGGCAGTGT  
GTTGTGACGATCATATCCACTGCTGTCCAGTGGGTTACATGTTCTGGAGGCAGCTGTGTGTTGGCAGA  
GCACTCTATCCCTTGGATGAGGAAGACTTTGGCTCAGGGGCTGAAAAGTATGTAGTCATAACATTCATCC  
CTCTCTAGCTCTAACTTTAAGTGTGAGGCCATGTAAGATTTTTGAGTCTAACCTTTTTCTTTTTTTTTTT  
TTTTTGTAGCTACCAGAGTTTCACTGTGATGACACCGCCAGCTGCCAGAAAAGGAAAACCTGCTGTCTGT  
CTGGTATCTGGCAAGTGGGGTTGCTGTCTGTAGTGAAGGTGCAATGCCTTGTATTTGTTTTTCAGAAAT  
TGTATGATTTGCATACTCCTTGGCCTCCTGCTTTCTGGAATTTGGACTAGCTTTTCTTTGCAAAGTCTC  
CATGATATGCTGTAAATGTCTCCAACACAGAGTAGAAGTAGCCAACGTCATTCCAACCATATGAAGTGT  
TAAAGGTTAAATGTTGGGCTTGTCTCAGTTTGGTAGTTCCAATGACAGATCATCTTATCTGAGCAGGAA  
TATATATCTACATCATGACCTGTTATGGAGCTGCATTATATGGTCAGGCAGTTTCACTGAGTAATAGTCT  
GATCTTATTGATATAGTCTTAAAGTTCTGCATGCTCATAACTGGCAGCAACAGCCCTCCCATCAGCAAGT  
GGATCGTATTTAAAACCTTTCTATTGGTACTTTGTCCCAATTTACAATATCCAGGCTGAGTACAGCAAAT  
TCCCTTATAGTTGCTGCCTTTAGTCTAGTGTACTCATGGAATTTAGGTAACCTTGTGACTTCCCAGCAG  
GCTTGGACTGGCAGTTTTTGGATTTTGGCAAATGCCAGTGGGGCTGCTATAATTTGCCGTAAACGGTCC  
TATGATTTGGGCTGTGGCGGGCTGTTGAGCTTTTGTGACTTCAACTGCCAGAAAATTTTTGAATCC  
CAACCAGACTTGTCTTCCGCAAGATAAGACATGGTCATGGTCATTTAAAAATAAAAAATTTCTTACAATA  
CCTCCCTTAAATTTGCAAAATGCACTTATCTGTAGCCACATAATGTAATAATGTTTGCACCTTACATCTTTT  
TTTGAGAAATTTATTAGCAACTTGGAGGGAAAAGCCTCTATGTAGTCTGGTTTTCTTATTAATTCCTTATAT  
GAAATGTTTTATTTAGTCATTTTCTCCTTTCCAGGCTGTGTGCTGTAATGATCATCTTCATTGCTGTC  
CTGAAGGTTATACATGCTCCAGGGCGAATGCTCAAAAAATGGAACACTCCATCCCTTGGTTACAAAAAC  
TCCAGCTCTGACCCATGAAGGTAAGTGGTAAAATTTGGGTTGGAGTGTGAAAGGGTCTTCCAATCTGCAG  
GTGTTAACCTAAAATTTGGCTTACATGGCAATATGCCTGAGAAATGGTATAGAGAGATCAGTTGATGCACT  
GTTTGTGCTGGAGCAATCTACTAATTACATTATGGACTTGGGCAGGTGGTAAATATGGAACCTCTTTG  
TACCTTTTGCATTTGTACTATACAAGACCAAGCTACAATAGCAGCCAAGGTGAATAGTAAGGGCATTGGA  
CCAGCAGTATGGAATAAATCTAAGAAAATGGCAGTGGCTGCCATACTAGATGGTTTTCTTCTCTCACT  
TTCCCTTCTCTCCATTTCTCCTGTTGTATCTGTAGCCAGAGATGTCGAATGTGATGATATGTACAGCTGC  
CCAGATGGACAAAACCTGCTGCCGCTTGGCCTCAGGCGACTGGGGATGCTGCCCAATAGCACAGGTATGAC  
AGCTTGTGTTGGTACCAACCAACCAGAAGTCTCTCGCCCTCTGAGGGAAAGAGTGTGTGGTTACTATATGTT  
GTATATCTTAATCCCTTTCCAACAATTTCTTTTTGTTCCACCCAGGCTGTGTGCTGTGATGACCATGAAC  
ACTGCTGCCCTCCTGGTTACACATGTTCTGGAGGAAGTTGCCAGAAGGGGGAGCTCTCTATCCCATGGTT  
CCTCAAGACTCCAGCTTTGAAACAGAAGGGTAAAGTGGCAAAAATCAGGATCTAGACTTCATGTGTGTTGCA  
AAACACACAAAATAGGAGAATCCAAGACATTTTATAAGACATGGCCATTAAACATGTTCTCTAGTGGTT  
TTGTTTTTTCTTATGATTGACTCTCCTTTCCAATCCCTGTTTTCTATAGCCAGAGATGTCAGTGTGAT  
GATATGTACAGCTGCGCAGATGGGCAAACCTGCTGCCGCTGGCATCTGGGGACTGGGGATGCTGCCCTA  
TAGCACAGGTGTGAGAAATTTGCGGTCTTATATTATAATTTCTCAAGAGTCAACTTTTTGTCAACCTGTCC  
TTGGCTTCCACTTCTGACCCATTCCAAGACTTCCAATTCACCTTTACTTTACAACATTAACCTTCTCTCAC  
CCTCTGAGGAAAAGAGTGTGTGGTCACTATATGTTGTATATCTTGTTCCTTTTCCAACAATTTCTTTTTGTT  
CCCACCCAGGCTGTGTGCTGTGATGACCATGAACACTGCTGCCCTCCTGGATACACATGCTCTGGAGGA  
AGTTGCCAGCAGGGGGTGTCTTCAATCCCATGGTTCTCAAGACTCCAGCTTTGAAACAGAATGGTAAAGT  
GGCGAAAATCAGGGGAGACTGGATCTAGACTTCATGTGTGTGACAAAACACACAAAATAGGAGAATCCAAGA  
CCATTTTACAAGACATGGCCATTAAACATGTTCTCTAGTGGCTTTGTGTTTTCTTATGGTTGACCCTC  
CTTTCCAATCCCGTTTTCTGTAGCCAGAGATGTCAGTGTGATGATATGTATAGCTGCGCAGATGGGCA  
AACCTGCTGCCGCTGGCATCTGGGGACTGGGGATGCTGCCCTATTGCACAGGTATGAACACTTGTTAGG  
TACCAACCCATAAATCGCTCGCTTTCTGAGGGAAAGAGTGTGTGGTCACTATGTGTATCTGTTCAAATAA

TTTCTTCTGTCCCCACCCAGGCTGTGTGCTGTGATGACCATGAGCACTGCTGCCCTCCTGGTTACACAT  
GCTCCGGAGGACAGTGCCAGAAGGGGGAGCACTCCATCCCATTGTTTCAGCAAGACTCCAGCTTTGAAACA  
GAAGGGTAAGTGGCGAAATCAGGATCTAGACTTCATGTGTGTTGCAAAAACACACAAAATAGGAGAATCCAA  
GACCATATTACAAGACATGGCCATTAAACATGTTCACTAGTGGTTTTGTTTTCTTCATGAATGACCC  
TCCTTTCCAATCCCCATTTTCAATAGCCAGAGATGTCCAGTGTGATGAAATTTACAGCTGCCAGATGGG  
CAAACCTGTGCCGCTTGGCCTCTGGCGACTGGGGATGTGCCAATAGCACGGGTATGACAGCTTGT  
GTTACCAACCCATAAGTCTCTCGCCCTCTGATGGAAAGAGTGGGTGGTCACTTTATGTATCCTGTTCCAAC  
AATTTCTCCGTCTCCACCCAGGCTGTGTGCTGTGATGACCATGAACACTGCTGCCCTCATGGATACAT  
ATGCTCTGGAGGAAGTTGCCAGCAGGGGGAGCTCTCTATCCCATGGTTCCCTCAAGACTCCAGCTTTGAAA  
CAGAAGGGTAAGTGGCAAAAATCAGGGGAGACTGGATCTAGACTTAATGAGTGTACAAAACACACACAAA  
TAGGAGATTCCAAGACCATTTTACAAGACATGGCCATTAAACATGTTCTCTAGTGGCTTTGTTTTTCT  
TCATGATTGACTCTCTTTCCATTTCCCATTTTCAATAGCCAGAGATGTCCAGTGTGATGATATGTACAG  
TTGCCAGATGGACAAAACCTGCTGCCGCTTGGCCTCTGGTACTGGGGATGTGCCAATAGCACAGGTA  
TGACAGCTTGTGGTACCAACCCATAAGTCTCTTGGCCTCTGAGGGAACAGTGGGTGGTCACTATATGT  
ATCCTGTTCCAACAATTTCTTCTGTCCCACCCAGGCTGTGTGCTGTGATGACCATGAACACTGCTGCC  
CTCCTGGTTACACCTGCTCTGGAGGACAGTGCCAGAAGGGGGAGCACTCCATCCCATTGTTTCAGCAAGAC  
TCCAGCTCTGAGACAGGAGAGTAAGTCTGAAAACCTTTTACATTAGTTTATCAGGTGCCTGGGATTAG  
TTCTCCAAAACAGAAGTTCCCAAACCTTGTCTGGTATCCTTGTACATGGGATTTATTGTGATTTATTG  
TGTGATGTGAATGATGTATAATCATGTGTGGGTGAGCAAAATAAATAGGATCACATGAGGATCAGTATGTG  
CTTGGCGCATTAAATTTCTGGTGAAGCTTCTGTGTTTACCAGTCGGGCTGTTACTGAACTACTTACCTGT  
GTAGACAACCAAAATATCACGCTCAAGTCTATAAAACATGACCAGTATATCTGGCAATGAAATCGCCAAA  
TTCTAATGGTAGCTGCCGTGTCAGAAAGATGTGGTGTGATGAATATCCATTTCTCTGTGCCACTTTTT  
CTCTCCCTTCTATCTGCTTTTTTCTGTAGCCAAATATGTCAAATGTGATGATACCCACAGCTGTGCAGAT  
GGGCAAACCTGCTGCCGCTGGCATCTGGGGACTGGGGATGTGCCCTATAGCACAGGTATGCGAATTTG  
GTAGTCTTTCTCAAGTCCAACCTCCATTTTGTAGACTTGCATTGGCTTCCGCTTGTGAAACATTCCAAG  
ACTTCCAATTCAGCTTTACTTTACAACATTAACCTCATCTGTCCTGCTCCAGGCTGTGTGCTGTGATGA  
CCATGAACACTGCTGCCCCCTGGATATACCTGCTCTGGGTACAGTGCATGATTGGGGAGCACTCCATC  
CCATGGTTTCAGCAAGACCCCGCTTTAAAACAGAAGGGTAAGTGGCAAAAATCATGGGAGACAGGATCTAG  
ACTACATGTGTGTTTACAAAACACACAAAATAGGAGAAAAGACTGGCCATTAAACATGTTCTCTAGTGG  
CTTTGTTTTTCTTTATGATTGACTCTTCTTTCCAATCCCCGTTTTCTATAGCCAAAAGATGTCCAGTGTG  
ATGATATGTACAGCTGCGCAGATGGGCAAACCTGCTGCCGCTTGGCATCTGGGGACTGGGGATGTGCC  
TATAGCACAGGTGTGAGAAATTTGGTCTTATATTGTAATTTCTCAAGAGTCAACTTTTTGCCAACCTCT  
TCTTGGCTTCCACTTCTGACCCATTCTAAGACTTCCAATTCAACTTTACTTTACAACATTAACCTCATCT  
GTCCCTGCTCCAGGCTGTGTGTTGTGATGACCATGAACACTGCTGCCCTCCTGGTTACACATGCTCTGGA  
GGACAATGCCAGAAGGGAGAGCACTCCATCCATGGTACAGCAAGACTCCAGCTCTGAAGCAAGAAGGTA  
AGTGTAGACCGGGTAAAGGAAAAGACCAGGCCTACAAAAGCCGTAGCTTGTACACTGCCTGGAAAAGCGTT  
TAGTTATCAGCTGACTTGGCAGTTACTGGTGATATGGCATCAATTGTAAACATGTTTATGTCTCTTGAGA  
CATCAGTAGAATTTGGCAGCCAATTATCTCATTGCACCAATTTTCATAAGGCAATTTGGCTAACACTCCT  
GTCAATGTTTTTGCAGGTAACATAGTGAATGTGATGATTCCCTTCGCTGTAAAGATGGTTACACTTGT  
GTCGCATGGTCTCTGGGGTGTGGGGATGTGCCCTATAGAGAAGGTATGAGCTGGCGTCATTAACCTACA  
GAAGGGGATATCCAATATGGTTATGAAAACCTTTCATGTGAAAAGTTCATACTGAGAGGATGGAACACAT  
CGTATTCTTGTCTAATTTGGGATGCACCGAATCCAAAATTTCTGCCAAGATTCTGTCTTTTTTCAGCAGGAT  
ATGGAGTCGGTGAATCCACGCTCCTGGCCAATCCGAATCCCTAAAATCATGTGACTTTGTACACACTT  
TTTTTCGCCAAATGCTTTGCACATGCAAATTAGGATTCAGGTTTGGTATTCGGCCAAATTTTTTACAAAAG  
TATTCGGGGTTGAATCCAAAATAGTGGATTGGTTCCTCCGACTCTGAACATTCTAATACTCTGGCTG  
CAGATATGCTTTAGTCTGGCCACCTAAAAGTTGGCTACACAGTCATGTATACCCCATAAAAAAAAGATT  
GAAAAGAATCTGGGTAAGCAGAATGAGTCAAGGTACAGCTGCTTGTGAAGTCTTAAATTAAGCATTGGC  
CTTTGTACATATCAGATGTGTAAGATACCTTATCTTATTAATGTGACTGGATCATTAGGTATCAATTCCT  
TCCGGAACAAGCTTTCTGAGCCCTTCTGTCCCTGTGGTCACTACTGTCCCTTCTTGTCAATGTTTT  
CCTCTGTTCTCAGTCTGTACATCCTTAAAGTACTTTTTCCATAGTTTGTTTTTCATTTGGTCCCCCAA  
ATCCACACACATAACCCAACAGTGTGCCCTGCAAGATCCCTAGGATGCAGTCAGAGGGTGGCCTTCAGG  
TCTAAACAGGGAGTCAAAAATAGGCCATGGAATTTCAAGTACATAGAGGCCAAAACAGCCCAATAAATAA  
TGACTGTCTATGGCATTGCCAGAACCACAGATTAGGCCAGTCCAGGCCTGGTGGGAGTCAAAAAGTTT  
AAGTTCAAGACACATAGGAAGATTAGTTTTAAAACGACTAATCGTGTGATTTTGTACCATAGATTAAT  
ATACAAGTCGGTGCAACTCATACCCTTTGTGTCTTCACTAGTGTGATGAGCGAATCTGAATCTGTTTTATT  
GCTTCGCATAAAAATTCGCAAAAACGGCGAAAACGCATTTGACGCGCTTATATTTTTTTTTGACGCGACTGCG  
CCCTTTTACGCAATCGCGCCGTTTTGACACGCAACAATTTTTTTTTCCGAGTGAATTTTACAGAAAGT  
TTCACGAAAACAATACGCCAATGGCGAAAATGTGGAAAATTCGTTCTTCACTAGTCTTACCCTATAAAGTGA  
GACACAGAGCAGCTGGTCACTTCCACCCCTCCAACCTCTGTTTCCCTGCCTGACATCACTGTCTGCGTGG  
AAAATATTAATATAATCCCAGTTCACACGCTCGTGTCTAGGAGTCACATTTGACTCTGCTCTCTTTCA

CTCCCCACATTCAAACACACTCTAAATCCTGTCGATTTACCTCAAAAACATTGCATGCATTTCGACCTCC  
CCTCACTCATGAGACTGCCAAAATTCTCATCCACGCCCTTGTCACTCGCTAAGACTACTGCAACTCACT  
GCTCTGTGGGCTTCCCCTATCTAAACTGACCCCACTCCAATCCATCATGAACAGTGCTGCCAGACTCATA  
CACCTCTCCTTCCGCTCCAAAAGTGCTGCCCTCTCTGCCAATCCTTGCACTGGCTACCTGTCACGTACA  
GGATTCAAGTTCAAGATTCTTGCACTCGCTTCAAAGCACTCACTGGTGCCGCACCGCTCTATTTAACCAC  
CCTAATCCCCAAGTACCCCCAGACGCAACCTTCGCTCAACGCATAACCTCCTTCTCTCCTCCTCACTC  
ATCACTTCTCTCATTCCCGCATCCAGGACTTCTCACGTGCTGCACCCATCCTCTGGAACGCCCTTCCCA  
GTCCATTAGGTATTGCCAGACTCTCCAAGCCTTTAAATGGTCTCTTAAAACACTCACCTTTTCACTCAAAC  
CTATAACCTAAACCCCCAAACATTCACTAACCACCAGTTTTTACCTCTCACTTACTGTCACCTTTACACAC  
CTACATGAACTCTAATGCCATGCTAGTTACCCTAACCTTATGTCTCACCCCTCCCTTTAGAAATGTAAGC  
TTTGCGAGCAGGGCCCTCCCCTAGTGTCTCCGATCCTCATCCAATGCAACTGCAAACCATTTTTGTGAA  
CTGCTTATATGTACATGTTAACGGTTATGTCTTTTGTACCCCTCTATTCTGTAAAAGCGTGCCTAAAATTG  
ATGGCGCTATATAAATAATAAATAAGACAACCTGTTTGTGTGTTTTAGCTGATGCAGTATTATCCGTAAA  
TGATCAACATTGTCTATTTTTGTAGCCATGACAAGTAGCTGCTACTAGTAGCTCCGTGTGTCTTACCCT  
AAATCTGCCTCTGAAAGGGTACTTGACCTTTTGGTTTGTCTTGTATTGTGTTAGATTGCTCTGTTAGAAA  
TGTACCCTATAGCTGAGAGGAAAACAGATTGTGATGCTGTCTTTCCCTCCTTAGGCTGTGTGCTGCTCCGA  
CCACTGGCACTGCTGCCCCAGGGGTTTACCTGTGATGCCAGAGGTACCTGTGTACTAGGCCAGTTCTCT  
ATCCCATGGCTCACTAAGGTTCCAGCTTTGCCCTTTGATGGGACTCACAGTATTTGTGACGATACCCACA  
CTTGCCCTTCTGGTACCACATGCTGCCCTGGAGAGGGGGGAGGCTGGAGATGCTGCCAGTGGAAAGAGGT  
CAGCAAAATGGTTAAACGAACTGTTATTTTTATTGGCTACAGCTTGTATTGTAACCCTTGTATCTTTTAGC  
TTTTGCCCTGATATTATTATTATTATGCCTTGCAGAAGGAGGCTATCGAAACCTCCCCAGTGACACCT  
CTGTCCAGGGATTACGTCTGGATTATGTCTGGTGTGATTCTCAGTATGCCTGCTTTGATGGCCAAACTTG  
TTGTCGAGGACTCGGAGGAGTGTGGAACCTGCTGTGTTTATACTCAGGTGAGCCCCACTGCAAGCTGACAG  
TTCTGTCATGGATATATGTGCCTATTGTAACCTTAGAGCAACCTATACTGGCACTGTGTAGCAGAGAATGC  
AGCTCTTATTCCACATGCAATGTCTTCCCTGCAGGGGGTGTGCTGCCAGACATGGTGCCTGCTGTCCC  
TATGGGTATGTGTGCTGAACCATGGAACGTCATGTAGTCGGTCAGGAAGCCCACGTTGGGATGGTCAGT  
CGGGAAGCCACATTGGGATGGAAAACAGTCCCCACGGGATGGTAAACGGCCCCCTTTCCTATGAACACA  
ATCCAAATCCACTTGATTGTTACTACTAAGATCCTTCTAAAAGCACTGGAATAAAATCAAATTTTTTTG  
TTTTATATGTTTAAACTAATGAGTTTTTTTTTTTTGTGCTGGGGGGGGGGGTGAAAGCTCACTTGCCTTTT  
ATTTATTTCTTTAAAAAGAGCCTCTGGGCCAAACGCTTGGGTTCTACTTGATATCCTAT

---

— Compiled, scripted, styled, and updated by R.G.E. Palfree —
